# Supplementary material for: Infectious Bronchitis Virus: A Comprehensive Multilocus Genomic Analysis to Compare DMV/1639 and QX Strains
Source: Preprints.org preprint supplement (doi:10.20944/preprints202208.0057.v1), 2022-08-02
Supplement: Supplementary file 1 [file supplementary]

## Sheet: 1a
Table S1a. Nucleotide identities between sequences in the QX dataset (n=101). Gene 1a.
	KR822424 TCoV/080385d/08 France	OM525802 D532/9/CH/05	KX219797 ck/CH/LXJ/02I/16 China	KX252772 ck/CH/LSHH/03II/16 China	KX252778 ck/CH/LJL/05I/16 China	HQ848267 GX-YL5/05 China	KF411041 CK/CH/LGX/091109/13 China	KP118886 ck/CH/LSD/111235/14 China	KX185058 ck/CH/LGS/08I/16 China	KX219791 ck/CH/LHLJ/07I/16 China	KX219792 ck/CH/LGS/06I/16 China	KX375805 ck/CH/LJS/07V/16 China	KX252789 ck/CH/LHLJ/090605/16 China	KX252777 ck/CH/LSD/07I/16 China	KX364293 ck/CH/LJL/07III/16 China	KX219794 ck/CH/LJS/101109/16 China	KX236009 ck/CH/LSX/130132/16 China	KX259250 ck/CH/LJS/101113/16 China	KX302862 ck/CH/LJS/101111/16 China	KX364299 ck/CH/LSD/101223/16 China	KX236007 ck/CH/LSD/100408/16 China	KX219801 ck/CH/LSD/120437/16 China	MK032181 gCoV/ck/Chi/I0347/11 China	KX275391 ck/CH/LHLJ/140927/16 China	KX219800 ck/CH/LSD/130611/16 China	KX252787 ck/CH/LLN/131040/16/ China	KX252785 ck/CH/LSD/100311/16 China	KY407556 gCoV/ck/Chi/I0114/14 China	MK618759 K047-12/12 Korea	HM245924 CQ04-1/04 China	KX252779 ck/CH/LLN/06I/16 China	MK032177 gCoV/ck/Chi/I0724/17 China	MK032179 gCoV/ck/Chi/I0922/17 China	MK032180 gCoV/ck/China/I0737/17 China	OM525803 D535/4/FR/05	KY933089 1148-A/field/17 UK	MN548289 QX UK	KY933090 L1148/vaccine/17 UK	MK581205 gCoV/Ck/Pol/548/04 Poland	OM525806 D722/SK/06	OM525804 D591/2/GR/05	KX272465 AR251-15/14 Sudan	FN430414 ITA/90254/05 Italy	JQ088078 CK/SWE/065/8946/10 Sweden	KT886454 gCoV/Ck/Pol/74/09 Poland	MK581206 gCoV/Ck/Pol/195/12 Poland	OM525805 D683/HU/06	KX236001 ck/CH/LSD/03I/16 China	KP662631 ck/ZA/3665/11 South Africa
KR822424 TCoV/080385d/08 France		84.686	84.79	84.849	84.959	84.766	84.908	85.035	84.866	84.774	84.95	84.908	84.891	84.816	85.018	84.866	84.858	84.807	84.533	84.832	84.841	85.043	84.799	84.925	85.018	85.026	85.624	85.464	84.782	86.188	85.085	85.447	84.849	84.925	89.602	89.602	89.602	89.56	88.758	89.44	89.802	89.266	92.279	90.983	89.188	89.453	92.321	86.548	89.171
OM525802 D532/9/CH/05	84.686		94.474	95.064	94.28	92.443	92.442	92.409	92.248	92.594	92.914	92.83	92.94	93.909	93.024	92.737	92.746	92.712	92.36	92.729	92.687	92.948	92.392	92.611	93.42	92.99	92.425	92.476	92.569	89.062	92.366	91.894	92.577	92.661	87.904	87.93	87.93	87.921	85.613	84.863	84.677	84.277	85.385	84.495	84.231	84.926	84.896	89.413	85.015
KX219797 ck/CH/LXJ/02I/16 China	84.79	94.474		95.363	94.352	92.944	92.624	92.775	93.171	93.197	93.568	93.509	93.214	94.621	93.315	93.534	93.542	93.492	93.165	93.5	93.416	93.281	92.674	92.86	92.278	92.202	93.467	92.742	92.86	90.078	92.986	92.084	93.079	93.138	88.515	88.515	88.515	88.507	85.76	84.749	84.555	84.235	85.204	84.499	83.906	84.926	85.078	89.055	84.859
KX252772 ck/CH/LSHH/03II/16 China	84.849	95.064	95.363		95.97	94.791	94.571	94.571	94.116	93.315	93.585	93.542	93.222	94.664	93.694	93.829	93.837	93.795	93.477	93.77	93.483	94.166	94.605	94.444	92.674	92.101	93.138	94.655	94.731	90.196	93.5	91.831	92.961	93.02	89.981	89.973	89.973	89.965	85.929	84.926	84.707	84.176	85.389	84.482	84.21	84.981	85.162	90.074	85.053
KX252778 ck/CH/LJL/05I/16 China	84.959	94.28	94.352	95.97		94.209	93.93	93.955	93.896	92.75	93.079	93.087	93.121	93.778	93.888	93.492	93.551	93.467	93.131	93.433	92.927	93.559	94.107	93.913	93.171	92.716	92.843	93.812	94.133	90.33	93.07	92.548	93.669	93.753	89.08	89.063	89.063	89.055	85.929	84.825	84.892	84.117	85.533	84.583	84.403	85.09	85.195	89.754	85.137
HQ848267 GX-YL5/05 China	84.766	92.443	92.944	94.791	94.209		97.96	97.463	97.21	96.316	96.67	96.603	96.266	94.765	96.738	96.805	96.847	96.771	96.46	96.814	96.367	96.822	97.8	97.8	95.903	95.136	93.771	96.814	97.277	93.071	91.613	94.942	96.106	96.181	89.426	89.435	89.435	89.426	85.584	84.91	84.624	84.236	85.34	84.601	84.388	84.7	84.969	88.061	85.063
KF411041 CK/CH/LGX/091109/13 China	84.908	92.442	92.624	94.571	93.93	97.96		97.64	96.99	96.097	96.417	96.333	96.198	94.52	96.468	96.426	96.485	96.4	96.106	96.383	96.139	96.662	97.42	97.53	95.802	95.515	93.669	97.151	97.319	92.75	91.502	94.815	95.962	96.055	89.358	89.366	89.366	89.358	85.735	84.951	84.69	84.336	85.271	84.625	84.319	84.821	85.111	88.01	85.045
KP118886 ck/CH/LSD/111235/14 China	85.035	92.409	92.775	94.571	93.955	97.463	97.64		96.594	96.131	96.468	96.392	95.962	94.849	96.324	96.552	96.577	96.535	96.216	96.544	96.114	97.783	98.213	97.226	95.532	95.439	93.585	97.302	96.839	92.564	91.367	94.36	95.507	95.599	89.543	89.569	89.569	89.552	85.819	84.917	84.74	84.521	85.364	84.886	84.235	84.795	85.221	88.077	85.239
KX185058 ck/CH/LGS/08I/16 China	84.866	92.248	93.171	94.116	93.896	97.21	96.99	96.594		96.442	96.763	96.678	96.417	95.127	96.982	97.016	97.058	96.982	96.671	96.982	96.712	96.299	96.78	96.931	95.819	95.448	93.972	95.903	96.291	93.315	91.654	95.338	96.392	96.485	89.35	89.358	89.358	89.35	85.777	84.943	84.816	84.538	85.221	84.844	84.454	84.867	84.976	88.086	85.146
KX219791 ck/CH/LHLJ/07I/16 China	84.774	92.594	93.197	93.315	92.75	96.316	96.097	96.131	96.442		99.309	99.208	98.542	96.308	97.488	97.353	97.378	97.311	97.008	97.378	98.204	96.215	95.903	96.021	95.228	94.959	94.082	94.967	95.397	93.23	91.435	94.773	95.886	95.962	88.953	88.979	88.979	88.97	85.65	84.906	84.783	84.513	85.229	84.693	84.434	84.795	85.027	88	85.263
KX219792 ck/CH/LGS/06I/16 China	84.95	92.914	93.568	93.585	93.079	96.67	96.417	96.468	96.763	99.309		99.646	98.845	96.645	97.833	97.682	97.707	97.656	97.337	97.69	98.542	96.535	96.257	96.375	95.574	95.245	94.419	95.237	95.76	93.585	91.738	95.102	96.232	96.308	89.156	89.164	89.164	89.156	85.827	85.111	84.951	84.665	85.406	84.869	84.437	84.905	85.204	88.17	85.416
KX375805 ck/CH/LJS/07V/16 China	84.908	92.83	93.509	93.542	93.087	96.603	96.333	96.392	96.678	99.208	99.646		98.727	96.586	97.749	97.564	97.623	97.521	97.236	97.572	98.44	96.501	96.198	96.274	95.549	95.195	94.369	95.195	95.675	93.517	91.688	95.077	96.181	96.274	89.088	89.097	89.097	89.088	85.819	85.103	84.884	84.614	85.398	84.861	84.395	84.896	85.212	88.086	85.373
KX252789 ck/CH/LHLJ/090605/16 China	84.891	92.94	93.214	93.222	93.121	96.266	96.198	95.962	96.417	98.542	98.845	98.727		95.886	97.901	97.193	97.218	97.151	96.848	97.218	97.833	96.071	95.92	96.147	95.658	95.313	94.208	94.976	95.515	93.382	91.587	95.085	96.181	96.257	88.701	88.709	88.709	88.701	85.752	85.061	84.858	84.521	85.364	84.794	84.403	84.795	85.069	88.119	85.239
KX252777 ck/CH/LSD/07I/16 China	84.816	93.909	94.621	94.664	93.778	94.765	94.52	94.849	95.127	96.308	96.645	96.586	95.886		95.321	95.49	95.549	95.448	95.162	95.498	95.76	95.127	94.756	94.596	93.703	93.45	94.495	94.402	94.647	91.898	92.05	93.171	94.276	94.369	89.173	89.198	89.198	89.189	85.878	84.909	84.673	84.285	85.347	84.676	84.159	84.88	85.145	88.541	85.07
KX364293 ck/CH/LJL/07III/16 China	85.018	93.024	93.315	93.694	93.888	96.738	96.468	96.324	96.982	97.488	97.833	97.749	97.901	95.321		97.766	97.842	97.724	97.413	97.791	97.64	96.341	96.265	96.426	95.987	95.802	94.208	95.338	95.903	93.374	91.949	95.81	96.915	97.007	88.996	89.004	89.004	88.996	85.819	85.035	85.061	84.69	85.533	84.853	84.513	84.93	85.103	88.06	85.323
KX219794 ck/CH/LJS/101109/16 China	84.866	92.737	93.534	93.829	93.492	96.805	96.426	96.552	97.016	97.353	97.682	97.564	97.193	95.49	97.766		99.874	99.874	99.545	99.806	98.128	96.594	96.409	97.058	96.063	95.911	94.225	95.422	95.844	93.053	91.949	96.383	97.53	97.606	89.147	89.156	89.156	89.147	85.693	84.875	84.774	84.505	85.364	84.802	84.319	84.799	84.917	87.984	85.18
KX236009 ck/CH/LSX/130132/16 China	84.858	92.746	93.542	93.837	93.551	96.847	96.485	96.577	97.058	97.378	97.707	97.623	97.218	95.549	97.842	99.874		99.831	99.52	99.798	98.137	96.636	96.434	97.083	96.105	95.937	94.251	95.448	95.886	93.087	91.958	96.459	97.589	97.682	89.173	89.164	89.164	89.173	85.65	84.867	84.749	84.513	85.356	84.81	84.294	84.766	84.901	88.018	85.171
KX259250 ck/CH/LJS/101113/16 China	84.807	92.712	93.492	93.795	93.467	96.771	96.4	96.535	96.982	97.311	97.656	97.521	97.151	95.448	97.724	99.874	99.831		99.503	99.764	98.086	96.56	96.375	97.033	96.021	95.869	94.166	95.389	95.81	93.02	91.915	96.341	97.488	97.564	89.088	89.097	89.097	89.088	85.634	84.816	84.698	84.446	85.313	84.751	84.269	84.732	84.867	87.951	85.121
KX302862 ck/CH/LJS/101111/16 China	84.533	92.36	93.165	93.477	93.131	96.46	96.106	96.216	96.671	97.008	97.337	97.236	96.848	95.162	97.413	99.545	99.52	99.503		99.435	97.8	96.249	96.064	96.721	95.718	95.558	93.873	95.061	95.508	92.735	91.614	96.03	97.16	97.252	88.796	88.805	88.805	88.796	85.385	84.567	84.458	84.197	85.064	84.494	84.02	84.466	84.601	87.659	84.888
KX364299 ck/CH/LSD/101223/16 China	84.832	92.729	93.5	93.77	93.433	96.814	96.383	96.544	96.982	97.378	97.69	97.572	97.218	95.498	97.791	99.806	99.798	99.764	99.435		98.086	96.586	96.383	97.033	96.038	95.878	94.175	95.397	95.835	93.045	91.873	96.35	97.496	97.572	89.105	89.114	89.114	89.105	85.642	84.875	84.74	84.488	85.356	84.785	84.302	84.74	84.909	87.959	85.154
KX236007 ck/CH/LSD/100408/16 China	84.841	92.687	93.416	93.483	92.927	96.367	96.139	96.114	96.712	98.204	98.542	98.44	97.833	95.76	97.64	98.128	98.137	98.086	97.8	98.086		96.265	95.894	96.122	95.389	95.06	94.225	95.001	95.524	93.121	91.603	95.009	96.139	96.232	89.08	89.071	89.071	89.063	85.785	85.019	84.875	84.597	85.356	84.81	84.37	84.846	85.069	88.018	85.154
KX219801 ck/CH/LSD/120437/16 China	85.043	92.948	93.281	94.166	93.559	96.822	96.662	97.783	96.299	96.215	96.535	96.501	96.071	95.127	96.341	96.594	96.636	96.56	96.249	96.586	96.265		97.783	96.611	95.869	95.456	93.821	96.206	96.063	92.556	91.334	95.068	96.131	96.223	89.164	89.164	89.164	89.156	85.979	85.229	84.833	84.665	85.533	85.004	84.446	85.056	85.33	88.052	85.289
MK032181 gCoV/ck/Chi/I0347/11 China	84.799	92.392	92.674	94.605	94.107	97.8	97.42	98.213	96.78	95.903	96.257	96.198	95.92	94.756	96.265	96.409	96.434	96.375	96.064	96.383	95.894	97.783		97.741	95.684	95.11	93.618	97.226	96.974	92.548	91.435	94.765	95.894	95.97	89.442	89.442	89.442	89.434	85.844	85.044	84.639	84.294	85.28	84.532	84.353	84.871	85.103	87.9	85.087
KX275391 ck/CH/LHLJ/140927/16 China	84.925	92.611	92.86	94.444	93.913	97.8	97.53	97.226	96.931	96.021	96.375	96.274	96.147	94.596	96.426	97.058	97.083	97.033	96.721	97.033	96.122	96.611	97.741		96.215	95.363	93.694	96.754	96.974	92.767	91.435	95.456	96.493	96.586	89.164	89.173	89.173	89.164	85.785	85.019	84.766	84.387	85.474	84.701	84.446	84.867	85.103	87.883	85.196
KX219800 ck/CH/LSD/130611/16 China	85.018	93.42	92.278	92.674	93.171	95.903	95.802	95.532	95.819	95.228	95.574	95.549	95.658	93.703	95.987	96.063	96.105	96.021	95.718	96.038	95.389	95.869	95.684	96.215		97.623	93.365	94.908	95.254	92.345	90.845	96.56	97.378	97.479	87.715	87.723	87.723	87.715	85.693	85.204	84.825	84.538	85.541	84.954	84.69	85.137	85.061	87.698	85.373
KX252787 ck/CH/LLN/131040/16/ China	85.026	92.99	92.202	92.101	92.716	95.136	95.515	95.439	95.448	94.959	95.245	95.195	95.313	93.45	95.802	95.911	95.937	95.869	95.558	95.878	95.06	95.456	95.11	95.363	97.623		92.969	94.925	94.571	92	90.878	96.619	97.378	97.462	87.647	87.673	87.673	87.647	85.608	85.061	84.917	84.698	85.608	84.937	84.555	85.048	85.246	87.622	85.34
KX252785 ck/CH/LSD/100311/16 China	85.624	92.425	93.467	93.138	92.843	93.771	93.669	93.585	93.972	94.082	94.419	94.369	94.208	94.495	94.208	94.225	94.251	94.166	93.873	94.175	94.225	93.821	93.618	93.694	93.365	92.969		93.509	93.416	91.865	91.46	92.716	93.787	93.88	87.909	87.917	87.917	87.909	86.527	85.709	85.28	85.861	85.878	85.619	84.833	85.604	85.642	88.979	85.483
KY407556 gCoV/ck/Chi/I0114/14 China	85.464	92.476	92.742	94.655	93.812	96.814	97.151	97.302	95.903	94.967	95.237	95.195	94.976	94.402	95.338	95.422	95.448	95.389	95.061	95.397	95.001	96.206	97.226	96.754	94.908	94.925	93.509		96.367	91.764	91.544	93.703	94.866	94.942	90.007	90.015	90.015	90.007	86.274	85.592	85.592	85.398	85.617	85.703	84.648	85.276	85.777	88.145	86.107
MK618759 K047-12/12 Korea	84.782	92.569	92.86	94.731	94.133	97.277	97.319	96.839	96.291	95.397	95.76	95.675	95.515	94.647	95.903	95.844	95.886	95.81	95.508	95.835	95.524	96.063	96.974	96.974	95.254	94.571	93.416	96.367		92.489	91.839	94.09	95.237	95.33	89.232	89.257	89.257	89.248	85.743	84.943	84.53	84.244	85.347	84.381	84.252	84.854	85.061	88.077	85.036
HM245924 CQ04-1/04 China	86.188	89.062	90.078	90.196	90.33	93.071	92.75	92.564	93.315	93.23	93.585	93.517	93.382	91.898	93.374	93.053	93.087	93.02	92.735	93.045	93.121	92.556	92.548	92.767	92.345	92	91.865	91.764	92.489		88.805	91.561	92.733	92.817	88.482	88.498	88.498	88.473	87.117	86.594	86.493	86.198	86.729	86.184	85.937	86.228	86.434	90.866	86.79
KX252779 ck/CH/LLN/06I/16 China	85.085	92.366	92.986	93.5	93.07	91.613	91.502	91.367	91.654	91.435	91.738	91.688	91.587	92.05	91.949	91.949	91.958	91.915	91.614	91.873	91.603	91.334	91.435	91.435	90.845	90.878	91.46	91.544	91.839	88.805		90.685	91.637	91.713	87.605	87.614	87.614	87.605	85.802	84.968	85.103	84.517	85.853	84.869	84.184	85.158	85.347	88.869	85.761
MK032177 gCoV/ck/Chi/I0724/17 China	85.447	91.894	92.084	91.831	92.548	94.942	94.815	94.36	95.338	94.773	95.102	95.077	95.085	93.171	95.81	96.383	96.459	96.341	96.03	96.35	95.009	95.068	94.765	95.456	96.56	96.619	92.716	93.703	94.09	91.561	90.685		98.533	98.617	87.041	87.049	87.049	87.058	85.878	85.65	85.297	85.44	85.954	85.341	85.035	85.752	85.667	86.999	86.141
MK032179 gCoV/ck/Chi/I0922/17 China	84.849	92.577	93.079	92.961	93.669	96.106	95.962	95.507	96.392	95.886	96.232	96.181	96.181	94.276	96.915	97.53	97.589	97.488	97.16	97.496	96.139	96.131	95.894	96.493	97.378	97.378	93.787	94.866	95.237	92.733	91.637	98.533		99.882	88.17	88.161	88.161	88.17	85.886	85.01	84.749	84.412	85.305	84.743	84.462	84.934	85.027	88.145	85.264
MK032180 gCoV/ck/China/I0737/17 China	84.925	92.661	93.138	93.02	93.753	96.181	96.055	95.599	96.485	95.962	96.308	96.274	96.257	94.369	97.007	97.606	97.682	97.564	97.252	97.572	96.232	96.223	95.97	96.586	97.479	97.462	93.88	94.942	95.33	92.817	91.713	98.617	99.882		88.246	88.237	88.237	88.246	85.962	85.086	84.825	84.505	85.406	84.819	84.53	84.993	85.103	88.22	85.365
OM525803 D535/4/FR/05	89.602	87.904	88.515	89.981	89.08	89.426	89.358	89.543	89.35	88.953	89.156	89.088	88.701	89.173	88.996	89.147	89.173	89.088	88.796	89.105	89.08	89.164	89.442	89.164	87.715	87.647	87.909	90.007	89.232	88.482	87.605	87.041	88.17	88.246		99.806	99.806	99.755	90.823	89.465	87.433	87.449	88.428	87.512	89.229	89.001	89.204	88.395	87.316
KY933089 1148-A/field/17 UK	89.602	87.93	88.515	89.973	89.063	89.435	89.366	89.569	89.358	88.979	89.164	89.097	88.709	89.198	89.004	89.156	89.164	89.097	88.805	89.114	89.071	89.164	89.442	89.173	87.723	87.673	87.917	90.015	89.257	88.498	87.614	87.049	88.161	88.237	99.806		100	99.932	90.798	89.457	87.433	87.475	88.445	87.52	89.229	89.001	89.212	88.404	87.341
MN548289 QX UK	89.602	87.93	88.515	89.973	89.063	89.435	89.366	89.569	89.358	88.979	89.164	89.097	88.709	89.198	89.004	89.156	89.164	89.097	88.805	89.114	89.071	89.164	89.442	89.173	87.723	87.673	87.917	90.015	89.257	88.498	87.614	87.049	88.161	88.237	99.806	100		99.932	90.798	89.457	87.433	87.475	88.445	87.52	89.229	89.001	89.212	88.404	87.341
KY933090 L1148/vaccine/17 UK	89.56	87.921	88.507	89.965	89.055	89.426	89.358	89.552	89.35	88.97	89.156	89.088	88.701	89.189	88.996	89.147	89.173	89.088	88.796	89.105	89.063	89.156	89.434	89.164	87.715	87.647	87.909	90.007	89.248	88.473	87.605	87.058	88.17	88.246	99.755	99.932	99.932		90.756	89.432	87.416	87.441	88.403	87.486	89.178	88.942	89.195	88.395	87.332
MK581205 gCoV/Ck/Pol/548/04 Poland	88.758	85.613	85.76	85.929	85.929	85.584	85.735	85.819	85.777	85.65	85.827	85.819	85.752	85.878	85.819	85.693	85.65	85.634	85.385	85.642	85.785	85.979	85.844	85.785	85.693	85.608	86.527	86.274	85.743	87.117	85.802	85.878	85.886	85.962	90.823	90.798	90.798	90.756		93.082	88.425	88.082	88.611	88.233	91.42	94.541	89.555	87.721	88.08
OM525806 D722/SK/06	89.44	84.863	84.749	84.926	84.825	84.91	84.951	84.917	84.943	84.906	85.111	85.103	85.061	84.909	85.035	84.875	84.867	84.816	84.567	84.875	85.019	85.229	85.044	85.019	85.204	85.061	85.709	85.592	84.943	86.594	84.968	85.65	85.01	85.086	89.465	89.457	89.457	89.432	93.082		89.302	89.119	88.982	89.026	92.643	92.534	90.212	86.91	88.921
OM525804 D591/2/GR/05	89.802	84.677	84.555	84.707	84.892	84.624	84.69	84.74	84.816	84.783	84.951	84.884	84.858	84.673	85.061	84.774	84.749	84.698	84.458	84.74	84.875	84.833	84.639	84.766	84.825	84.917	85.28	85.592	84.53	86.493	85.103	85.297	84.749	84.825	87.433	87.433	87.433	87.416	88.425	89.302		94.574	90.01	91.47	88.897	89.037	89.805	86.718	92.666
KX272465 AR251-15/14 Sudan	89.266	84.277	84.235	84.176	84.117	84.236	84.336	84.521	84.538	84.513	84.665	84.614	84.521	84.285	84.69	84.505	84.513	84.446	84.197	84.488	84.597	84.665	84.294	84.387	84.538	84.698	85.861	85.398	84.244	86.198	84.517	85.44	84.412	84.505	87.449	87.475	87.475	87.441	88.082	89.119	94.574		89.515	92.947	89.018	89.098	89.356	86.322	92.094
FN430414 ITA/90254/05 Italy	92.279	85.385	85.204	85.389	85.533	85.34	85.271	85.364	85.221	85.229	85.406	85.398	85.364	85.347	85.533	85.364	85.356	85.313	85.064	85.356	85.356	85.533	85.28	85.474	85.541	85.608	85.878	85.617	85.347	86.729	85.853	85.954	85.305	85.406	88.428	88.445	88.445	88.403	88.611	88.982	90.01	89.515		91.285	89.091	89.669	91.148	86.904	90.508
JQ088078 CK/SWE/065/8946/10 Sweden	90.983	84.495	84.499	84.482	84.583	84.601	84.625	84.886	84.844	84.693	84.869	84.861	84.794	84.676	84.853	84.802	84.81	84.751	84.494	84.785	84.81	85.004	84.532	84.701	84.954	84.937	85.619	85.703	84.381	86.184	84.869	85.341	84.743	84.819	87.512	87.52	87.52	87.486	88.233	89.026	91.47	92.947	91.285		91.065	89.009	89.961	86.072	90.737
KT886454 gCoV/Ck/Pol/74/09 Poland	89.188	84.231	83.906	84.21	84.403	84.388	84.319	84.235	84.454	84.434	84.437	84.395	84.403	84.159	84.513	84.319	84.294	84.269	84.02	84.302	84.37	84.446	84.353	84.446	84.69	84.555	84.833	84.648	84.252	85.937	84.184	85.035	84.462	84.53	89.229	89.229	89.229	89.178	91.42	92.643	88.897	89.018	89.091	91.065		91.631	88.4	86.044	87.978
MK581206 gCoV/Ck/Pol/195/12 Poland	89.453	84.926	84.926	84.981	85.09	84.7	84.821	84.795	84.867	84.795	84.905	84.896	84.795	84.88	84.93	84.799	84.766	84.732	84.466	84.74	84.846	85.056	84.871	84.867	85.137	85.048	85.604	85.276	84.854	86.228	85.158	85.752	84.934	84.993	89.001	89.001	89.001	88.942	94.541	92.534	89.037	89.098	89.669	89.009	91.631		89.825	86.739	89.011
OM525805 D683/HU/06	92.321	84.896	85.078	85.162	85.195	84.969	85.111	85.221	84.976	85.027	85.204	85.212	85.069	85.145	85.103	84.917	84.901	84.867	84.601	84.909	85.069	85.33	85.103	85.103	85.061	85.246	85.642	85.777	85.061	86.434	85.347	85.667	85.027	85.103	89.204	89.212	89.212	89.195	89.555	90.212	89.805	89.356	91.148	89.961	88.4	89.825		86.98	89.42
KX236001 ck/CH/LSD/03I/16 China	86.548	89.413	89.055	90.074	89.754	88.061	88.01	88.077	88.086	88	88.17	88.086	88.119	88.541	88.06	87.984	88.018	87.951	87.659	87.959	88.018	88.052	87.9	87.883	87.698	87.622	88.979	88.145	88.077	90.866	88.869	86.999	88.145	88.22	88.395	88.404	88.404	88.395	87.721	86.91	86.718	86.322	86.904	86.072	86.044	86.739	86.98		87.824
KP662631 ck/ZA/3665/11 South Africa	89.171	85.015	84.859	85.053	85.137	85.063	85.045	85.239	85.146	85.263	85.416	85.373	85.239	85.07	85.323	85.18	85.171	85.121	84.888	85.154	85.154	85.289	85.087	85.196	85.373	85.34	85.483	86.107	85.036	86.79	85.761	86.141	85.264	85.365	87.316	87.341	87.341	87.332	88.08	88.921	92.666	92.094	90.508	90.737	87.978	89.011	89.42	87.824
KF377577 4/91 vaccine China	89.266	84.345	84.26	84.285	84.294	84.32	84.378	84.673	84.673	84.462	84.631	84.614	84.488	84.403	84.597	84.589	84.58	84.521	84.264	84.555	84.623	84.791	84.353	84.454	84.74	84.791	85.962	85.507	84.294	86.013	84.602	85.853	84.479	84.572	87.449	87.458	87.458	87.424	88.2	88.892	92.328	95.579	89.145	95.584	90.857	88.963	88.942	86.002	90.518
KP118881 ck/CH/LBJ/140413/14 China	89.283	84.362	84.277	84.302	84.311	84.337	84.395	84.673	84.69	84.479	84.648	84.631	84.505	84.42	84.614	84.606	84.597	84.538	84.281	84.572	84.639	84.808	84.37	84.471	84.757	84.808	85.979	85.524	84.311	86.03	84.619	85.87	84.496	84.589	87.466	87.475	87.475	87.441	88.217	88.909	92.345	95.595	89.161	95.601	90.874	88.98	88.959	86.019	90.535
KP118880 ck/CH/LHB/130927/14 China	89.258	84.336	84.252	84.277	84.277	84.312	84.37	84.648	84.665	84.454	84.623	84.606	84.479	84.395	84.58	84.58	84.572	84.513	84.256	84.547	84.614	84.783	84.344	84.446	84.732	84.799	85.945	85.499	84.286	86.004	84.585	85.844	84.471	84.564	87.441	87.449	87.449	87.416	88.183	88.875	92.312	95.562	89.136	95.576	90.84	88.947	88.934	85.994	90.501
KP118888 ck/CH/LLN/130102/15 China	89.275	84.353	84.269	84.294	84.302	84.329	84.387	84.665	84.681	84.471	84.639	84.623	84.496	84.412	84.606	84.597	84.589	84.53	84.273	84.564	84.631	84.799	84.361	84.462	84.749	84.799	85.971	85.516	84.303	86.021	84.61	85.861	84.488	84.58	87.458	87.466	87.466	87.433	88.209	88.9	92.337	95.587	89.153	95.593	90.865	88.972	88.951	86.01	90.527
MZ367369 IBV/Ck/Bel/4134_001/19 Belgium	89.283	84.362	84.277	84.302	84.311	84.337	84.395	84.673	84.69	84.479	84.648	84.631	84.505	84.42	84.614	84.606	84.597	84.538	84.281	84.572	84.639	84.808	84.37	84.471	84.757	84.808	85.979	85.524	84.311	86.03	84.619	85.87	84.496	84.589	87.466	87.475	87.475	87.441	88.217	88.909	92.345	95.595	89.161	95.601	90.874	88.98	88.959	86.019	90.535
KP118884 ck/CH/LSD/110651/15 China	89.258	84.336	84.26	84.285	84.294	84.32	84.378	84.656	84.673	84.462	84.631	84.614	84.488	84.403	84.597	84.589	84.58	84.521	84.264	84.555	84.623	84.791	84.353	84.454	84.74	84.791	85.962	85.507	84.294	86.013	84.602	85.87	84.496	84.572	87.441	87.449	87.449	87.416	88.192	88.883	92.32	95.57	89.153	95.576	90.849	88.955	88.934	86.002	90.51
KP118882 ck/CH/LBJ/140402/14 China	89.266	84.345	84.26	84.285	84.294	84.32	84.378	84.656	84.673	84.462	84.631	84.614	84.488	84.403	84.597	84.589	84.58	84.521	84.264	84.555	84.623	84.791	84.353	84.454	84.74	84.791	85.962	85.507	84.294	86.013	84.602	85.853	84.479	84.572	87.449	87.458	87.458	87.424	88.2	88.892	92.328	95.579	89.145	95.584	90.857	88.963	88.942	86.002	90.518
KP118892 ck/CH/LLN/120101 China	89.266	84.345	84.26	84.285	84.294	84.32	84.378	84.69	84.673	84.462	84.631	84.614	84.488	84.403	84.597	84.589	84.58	84.521	84.264	84.555	84.623	84.791	84.353	84.454	84.74	84.791	85.962	85.524	84.311	86.013	84.585	85.853	84.479	84.572	87.449	87.458	87.458	87.424	88.183	88.892	92.328	95.562	89.128	95.568	90.84	88.947	88.925	86.002	90.518
KP118891 ck/CH/LHLJ/111246/14 China	89.241	84.328	84.26	84.269	84.277	84.32	84.378	84.639	84.673	84.462	84.631	84.614	84.488	84.387	84.597	84.589	84.58	84.521	84.264	84.555	84.623	84.774	84.336	84.454	84.74	84.791	85.962	85.49	84.294	86.013	84.602	85.853	84.479	84.572	87.441	87.449	87.449	87.416	88.158	88.85	92.303	95.553	89.102	95.559	90.815	88.921	88.917	86.002	90.485
KP118893 ck/CH/LSD/110410/14 China	89.249	84.328	84.243	84.269	84.277	84.304	84.361	84.639	84.656	84.446	84.614	84.597	84.471	84.387	84.58	84.572	84.564	84.505	84.247	84.538	84.606	84.774	84.336	84.437	84.724	84.774	85.962	85.49	84.278	85.996	84.585	85.836	84.462	84.555	87.433	87.441	87.441	87.407	88.183	88.892	92.312	95.579	89.128	95.584	90.857	88.963	88.925	85.985	90.501
KP036503 ck/CH/LHB/121010 China	89.317	84.378	84.277	84.302	84.328	84.337	84.395	84.673	84.69	84.479	84.648	84.631	84.505	84.42	84.614	84.606	84.597	84.538	84.281	84.572	84.639	84.808	84.37	84.471	84.757	84.791	85.979	85.524	84.311	86.03	84.602	85.853	84.496	84.589	87.466	87.475	87.475	87.441	88.2	88.892	92.328	95.562	89.178	95.568	90.857	88.947	88.959	86.053	90.535
KP036504 ck/CH/LHB/130630 China	89.266	84.345	84.26	84.285	84.294	84.304	84.361	84.639	84.656	84.446	84.614	84.597	84.471	84.403	84.58	84.572	84.564	84.505	84.247	84.538	84.606	84.774	84.336	84.437	84.724	84.774	85.962	85.49	84.294	86.013	84.602	85.836	84.462	84.555	87.433	87.441	87.441	87.407	88.183	88.875	92.312	95.562	89.153	95.584	90.84	88.947	88.925	86.002	90.501
KP118883 ck/CH/LHB/121041 China	89.207	84.336	84.243	84.285	84.294	84.312	84.37	84.631	84.665	84.437	84.606	84.589	84.462	84.387	84.572	84.564	84.555	84.496	84.239	84.53	84.597	84.766	84.361	84.462	84.732	84.783	85.945	85.499	84.294	85.962	84.602	85.844	84.471	84.564	87.399	87.407	87.407	87.373	88.133	88.824	92.261	95.511	89.094	95.517	90.789	88.896	88.875	85.943	90.451
KP118887 ck/CH/LHB/140532/14 China	89.218	84.315	84.23	84.256	84.264	84.291	84.365	84.626	84.643	84.433	84.601	84.601	84.458	84.374	84.567	84.559	84.551	84.492	84.251	84.525	84.593	84.761	84.323	84.441	84.711	84.761	85.932	85.477	84.265	85.966	84.572	85.823	84.449	84.542	87.402	87.41	87.41	87.377	88.152	88.844	92.28	95.529	89.097	95.535	90.809	88.916	88.895	85.955	90.47
KP118885 ck/CH/LSD/110857/14 China	89.552	84.429	84.403	84.42	84.429	84.506	84.58	84.774	84.825	84.656	84.825	84.808	84.673	84.572	84.749	84.707	84.698	84.639	84.382	84.673	84.74	84.917	84.505	84.623	84.783	84.858	86.131	85.642	84.446	86.19	84.871	85.87	84.639	84.732	87.593	87.601	87.601	87.567	88.352	89.313	92.768	96.112	89.406	95.787	91.27	89.512	89.372	86.12	91.066
KP036502 ck/CH/LHLJ/140906 China	89.435	84.311	84.311	84.328	84.336	84.405	84.437	84.648	84.724	84.555	84.724	84.707	84.547	84.505	84.623	84.606	84.597	84.538	84.281	84.572	84.639	84.783	84.387	84.538	84.656	84.698	85.861	85.499	84.32	86.063	85.023	85.76	84.513	84.606	87.517	87.525	87.525	87.492	88.284	89.136	92.65	95.858	89.541	95.568	91.135	89.394	89.238	86.019	91.218
KJ135013 IBVUkr27/11 Ukraine	89.308	84.353	84.277	84.319	84.319	84.438	84.479	84.681	84.715	84.564	84.732	84.715	84.555	84.505	84.648	84.623	84.597	84.555	84.298	84.589	84.681	84.833	84.412	84.547	84.623	84.749	85.903	85.533	84.396	86.114	85.032	85.76	84.513	84.606	87.5	87.525	87.525	87.492	88.268	89.119	93.004	96.061	89.743	95.197	90.832	89.377	89.322	85.985	91.53
KJ425496 ck/CH/LHB/130573 China	89.401	84.598	84.589	84.715	84.665	84.7	84.707	84.783	84.766	84.757	84.909	84.867	84.732	84.614	84.816	84.648	84.623	84.572	84.332	84.606	84.724	84.842	84.631	84.698	84.732	84.884	85.313	85.709	84.564	86.392	85.47	85.962	84.74	84.816	87.635	87.66	87.66	87.643	88.301	89.204	95.125	95.723	89.76	91.464	88.259	89.242	89.6	86.878	94.471
KP343691 ck/CH/LGX/130530 China	89.418	84.564	84.564	84.698	84.648	84.683	84.707	84.766	84.749	84.74	84.892	84.85	84.715	84.597	84.799	84.631	84.606	84.555	84.323	84.589	84.707	84.825	84.614	84.681	84.69	84.842	85.313	85.693	84.547	86.375	85.453	85.954	84.707	84.783	87.618	87.643	87.643	87.627	88.31	89.221	95.133	95.765	89.76	91.464	88.276	89.292	89.583	86.862	94.522
KT736032 ck/CHLDL150434-II/16 China	89.409	84.572	84.538	84.707	84.673	84.716	84.757	84.816	84.783	84.774	84.909	84.884	84.749	84.614	84.842	84.665	84.639	84.589	84.348	84.623	84.74	84.858	84.648	84.715	84.724	84.892	85.33	85.743	84.564	86.409	85.445	85.971	84.74	84.816	87.635	87.66	87.66	87.643	88.318	89.246	95.066	95.714	89.743	91.413	88.284	89.275	89.575	86.853	94.488
KU356856 ck/CH/SCYB/140913/25 China	89.35	84.244	84.285	84.446	84.344	84.599	84.648	84.69	84.715	84.656	84.825	84.791	84.597	84.496	84.732	84.58	84.572	84.505	84.264	84.547	84.681	84.749	84.547	84.698	84.597	84.842	85.246	85.625	84.471	86.367	85.091	85.861	84.614	84.69	87.416	87.466	87.466	87.449	88.057	89.018	95.201	96.722	90.038	92.669	88.892	89.065	89.735	86.398	93.08
MT505388 CK/CH/SCMY/160315/20 China	89.447	84.298	84.382	84.492	84.408	84.636	84.686	84.719	84.762	84.711	84.88	84.846	84.652	84.593	84.762	84.644	84.635	84.568	84.327	84.61	84.745	84.787	84.576	84.745	84.669	84.863	85.318	85.722	84.48	86.405	85.188	85.857	84.652	84.728	87.487	87.521	87.521	87.504	88.128	89.098	95.079	96.625	90	92.9	89.174	89.17	89.723	86.402	92.933
KJ425497 ck/CH/LHB/130598/14 China	89.435	84.598	84.597	84.732	84.681	84.716	84.74	84.799	84.783	84.774	84.926	84.884	84.749	84.631	84.833	84.665	84.639	84.589	84.348	84.623	84.74	84.858	84.648	84.715	84.724	84.875	85.33	85.726	84.581	86.409	85.487	85.988	84.74	84.816	87.652	87.677	87.677	87.66	88.343	89.254	95.15	95.799	89.794	91.497	88.31	89.326	89.617	86.895	94.555
FN430415 NGA/A116E7/06 Nigeria	91.698	84.926	84.875	85.145	85.187	84.868	84.943	84.901	84.867	84.757	84.968	84.909	84.858	84.934	84.985	84.985	84.96	84.926	84.677	84.976	84.934	85.052	84.816	84.976	85.111	85.019	85.524	85.305	84.799	86.468	85.204	85.608	84.968	85.044	88.757	88.757	88.757	88.748	88.746	89.133	91.03	89.878	92.084	89.919	88.965	89.445	91.131	87.055	90.558
KR231009 B1648/84 Belgium	91.959	84.93	85.212	85.094	85.002	84.986	85.052	85.12	84.993	85.057	85.179	85.17	85.019	85.061	85.069	85.061	85.052	85.002	84.753	85.044	85.061	85.28	85.035	85.204	85.288	85.313	85.777	85.777	84.968	86.619	85.153	85.684	85.103	85.179	88.673	88.664	88.664	88.639	88.459	89.386	90.137	90.038	92.312	90.754	89.108	89.315	90.777	86.912	90.035
MN548285 CR88 (4/91)/88 France	93.128	85.031	85.28	85.195	85.103	85.138	85.221	85.229	85.195	85.12	85.305	85.254	85.111	85.195	85.238	85.035	85.052	84.993	84.744	85.035	85.204	85.423	85.111	85.137	85.305	85.406	86.004	85.903	85.153	86.872	85.499	85.718	85.162	85.238	88.832	88.823	88.823	88.823	88.569	89.808	91.721	90.906	91.882	90.543	88.805	89.382	91.595	87.359	90.98
MN548288 Italy02/02 Italy	93.079	85.495	85.271	85.507	85.693	85.365	85.364	85.423	85.28	85.179	85.381	85.322	85.364	85.339	85.465	85.271	85.297	85.212	84.947	85.246	85.271	85.465	85.254	85.406	85.49	85.575	86.03	85.634	85.271	86.687	85.575	85.861	85.28	85.364	89.119	89.119	89.119	89.094	88.838	89.403	90.263	89.263	93.155	90.669	89.386	89.698	91.688	87.098	89.723
MG021194 gCoV/Ck/IT/624I/96 Italy	90.982	85.292	85.356	85.44	85.684	85.416	85.431	85.516	85.356	85.457	85.667	85.676	85.465	85.448	85.541	85.457	85.474	85.398	85.166	85.431	85.457	85.541	85.448	85.617	85.625	85.659	85.726	85.962	85.585	87.074	86.02	86.038	85.49	85.575	88.04	88.032	88.032	88.032	88.307	89.268	90.76	90.075	93.281	90.433	89.091	89.1	90.811	87.241	91.469
KU900739 QIA-03342/03 Korea	91.31	85.309	85.448	85.423	85.482	85.399	85.516	85.566	85.499	85.339	85.549	85.516	85.482	85.457	85.516	85.364	85.356	85.305	85.031	85.339	85.398	85.642	85.389	85.431	85.533	85.634	86.072	86.047	85.305	86.906	85.777	85.886	85.398	85.482	88.512	88.512	88.512	88.47	88.796	89.218	90.322	89.296	90.912	90.341	88.906	89.58	90.642	87.165	89.842
KU900744 QIA-Q43/06 Korea	90.847	85.065	85.195	85.17	85.229	85.028	85.094	85.12	85.153	85.002	85.212	85.179	85.187	85.137	85.212	85.044	85.061	85.002	84.711	85.019	85.086	85.322	84.934	85.052	85.212	85.372	85.752	85.583	84.909	86.544	85.533	85.608	85.145	85.221	88.234	88.226	88.226	88.192	88.493	88.855	90.111	89.17	90.558	90.029	88.594	89.171	90.339	87.039	89.53
KJ425504 ck/CH/LHJL/091205 China	89.988	85.284	85.204	85.406	85.381	85.256	85.297	85.339	85.541	85.398	85.592	85.558	85.499	85.322	85.524	85.499	85.49	85.448	85.182	85.474	85.583	85.533	85.254	85.33	85.575	85.65	85.811	85.533	85.313	87.032	85.608	85.844	85.448	85.524	87.796	87.804	87.804	87.779	88.248	88.459	88.746	88.091	90.052	89.304	88.636	88.762	89.091	87.241	88.442
MH539771 IBV/SES/15AB-01 Canada	90.013	85.309	85.221	85.431	85.406	85.298	85.339	85.372	85.566	85.44	85.634	85.6	85.541	85.347	85.566	85.541	85.533	85.49	85.224	85.516	85.625	85.575	85.297	85.372	85.6	85.676	85.819	85.575	85.356	87.083	85.634	85.87	85.474	85.549	87.855	87.863	87.863	87.838	88.29	88.501	88.796	88.133	90.078	89.329	88.661	88.805	89.133	87.266	88.501
MH539772 IBV/SES/15SK-02 Canada	89.979	85.292	85.195	85.406	85.381	85.273	85.313	85.347	85.541	85.415	85.608	85.575	85.516	85.322	85.541	85.516	85.507	85.465	85.199	85.49	85.6	85.549	85.271	85.347	85.575	85.65	85.802	85.549	85.33	87.058	85.608	85.827	85.448	85.524	87.83	87.838	87.838	87.813	88.257	88.476	88.762	88.108	90.035	89.295	88.636	88.779	89.091	87.241	88.476
MK937830 M41/19 China	89.971	85.267	85.17	85.381	85.356	85.247	85.288	85.322	85.516	85.389	85.583	85.549	85.49	85.297	85.516	85.49	85.482	85.44	85.174	85.465	85.575	85.524	85.246	85.322	85.549	85.625	85.777	85.524	85.305	87.032	85.583	85.819	85.423	85.499	87.804	87.813	87.813	87.788	88.248	88.476	88.754	88.091	90.027	89.287	88.619	88.762	89.083	87.216	88.451
MW446887 IBV/M41/Y192 China	89.988	85.284	85.187	85.398	85.372	85.264	85.305	85.339	85.533	85.406	85.6	85.566	85.507	85.313	85.533	85.507	85.499	85.457	85.191	85.482	85.592	85.541	85.263	85.339	85.566	85.642	85.794	85.541	85.322	87.049	85.6	85.836	85.44	85.516	87.821	87.83	87.83	87.804	88.265	88.493	88.771	88.108	90.044	89.304	88.636	88.779	89.1	87.232	88.467
MW429061 IBV/M41/Y28 China	89.971	85.267	85.187	85.398	85.356	85.247	85.288	85.322	85.516	85.389	85.583	85.549	85.49	85.297	85.516	85.49	85.482	85.44	85.174	85.465	85.575	85.524	85.246	85.322	85.549	85.625	85.777	85.524	85.305	87.032	85.583	85.819	85.423	85.499	87.804	87.813	87.813	87.788	88.248	88.476	88.771	88.091	90.027	89.287	88.619	88.762	89.083	87.216	88.467
MW446888 IBV/M41/Y27 China	89.988	85.276	85.187	85.389	85.364	85.256	85.297	85.339	85.524	85.398	85.592	85.558	85.499	85.305	85.524	85.499	85.49	85.448	85.182	85.474	85.583	85.541	85.263	85.33	85.541	85.625	85.785	85.541	85.313	87.016	85.575	85.811	85.415	85.49	87.813	87.821	87.821	87.796	88.248	88.442	88.737	88.091	90.035	89.295	88.619	88.779	89.066	87.199	88.434
MW429062 IBV/M41/N56 China	89.979	85.276	85.179	85.389	85.364	85.256	85.297	85.33	85.524	85.398	85.592	85.558	85.499	85.305	85.524	85.499	85.49	85.448	85.182	85.474	85.583	85.533	85.254	85.33	85.558	85.634	85.785	85.533	85.313	87.041	85.592	85.827	85.431	85.507	87.821	87.83	87.83	87.804	88.257	88.467	88.762	88.099	90.035	89.295	88.628	88.771	89.091	87.224	88.459
MK728875 M41-CK/17 UK	90.005	85.301	85.204	85.415	85.389	85.281	85.322	85.356	85.549	85.423	85.617	85.583	85.524	85.33	85.549	85.524	85.516	85.474	85.208	85.499	85.608	85.558	85.28	85.356	85.583	85.659	85.811	85.558	85.339	87.066	85.617	85.853	85.457	85.533	87.838	87.847	87.847	87.821	88.282	88.493	88.788	88.125	90.061	89.321	88.653	88.796	89.117	87.249	88.484
KJ435286 ck/CH/LSD/1112150 China	89.988	85.208	85.12	85.305	85.28	85.188	85.238	85.263	85.431	85.297	85.524	85.474	85.415	85.204	85.457	85.44	85.423	85.406	85.123	85.415	85.499	85.448	85.17	85.263	85.49	85.583	85.709	85.448	85.229	86.99	85.541	85.76	85.372	85.44	87.754	87.762	87.762	87.737	88.189	88.417	88.695	88.108	90.019	89.278	88.594	88.712	89.074	87.165	88.383
KY047602 gCoV/Ck/Pol/G052/16 Poland	89.971	84.669	84.58	84.631	84.69	84.75	84.766	84.774	84.791	84.808	85.027	84.96	84.917	84.707	84.993	84.766	84.757	84.707	84.458	84.724	84.917	84.968	84.681	84.783	84.917	85.01	85.406	85.372	84.639	86.569	85.086	85.356	84.85	84.943	87.955	87.947	87.947	87.922	89.876	91.04	91.504	90.764	89.454	89.548	89.96	90.323	89.85	86.811	90.389
MK581207 gCoV/Ck/Pol/G103/16 Poland	89.963	84.677	84.564	84.631	84.681	84.716	84.732	84.757	84.774	84.791	84.985	84.934	84.901	84.69	84.968	84.766	84.757	84.707	84.458	84.724	84.875	84.951	84.665	84.749	84.892	84.968	85.423	85.356	84.589	86.544	85.094	85.313	84.808	84.901	87.947	87.939	87.939	87.913	89.851	91.023	91.471	90.756	89.428	89.514	89.969	90.306	89.816	86.794	90.356
MK581208 gCoV/Ck/Pol/G225/17 Poland	89.817	84.846	84.74	84.985	84.943	84.902	84.85	84.85	84.774	84.816	85.035	85.01	84.96	85.002	84.951	84.884	84.875	84.825	84.551	84.85	84.85	85.103	84.85	84.909	85.111	84.867	85.524	85.263	84.943	86.375	85.212	85.389	84.892	84.985	88.705	88.688	88.688	88.629	92.474	92.23	88.931	88.757	89.336	89.43	91.361	93.74	89.58	86.634	88.923
MK581202 gCoV/Ck/Pol/80/89 Poland	88.009	84.719	84.707	84.791	84.901	84.919	84.892	84.783	84.766	84.707	84.943	84.917	84.816	84.648	85.01	84.816	84.842	84.766	84.5	84.766	84.791	84.85	84.858	84.901	85.027	85.044	85.347	85.128	84.808	86.333	85.086	85.372	84.951	85.019	88.116	88.141	88.141	88.116	91.403	90.829	88.416	87.787	88.341	87.812	90.281	91.015	88.366	86.525	87.818
MK581203 gCoV/Ck/Pol/162/97 Poland	87.941	85.09	84.934	85.271	85.254	84.995	85.111	85.01	84.968	84.926	85.153	85.044	85.035	85.027	85.094	84.858	84.875	84.816	84.559	84.858	85.061	85.094	84.976	85.061	85.179	85.103	85.65	85.415	85.035	86.535	85.209	85.221	84.901	84.968	87.433	87.458	87.458	87.441	91.555	91.15	88.172	87.784	88.105	87.702	89.792	91.551	88.653	86.87	87.692
MK581204 gCoV/Ck/Pol/255/97 Poland	88.059	84.812	84.58	84.783	84.833	84.742	84.732	84.724	84.69	84.681	84.867	84.892	84.833	84.766	84.917	84.707	84.732	84.665	84.399	84.673	84.724	85.052	84.85	84.799	85.145	84.917	85.212	85.17	84.74	86.358	84.69	85.482	84.799	84.884	87.424	87.441	87.441	87.433	91.302	92.356	88.467	88.251	88.442	88.073	91.167	91.808	88.569	86.474	88.644
MT591566 CK/DE/IB80/16 Germany	90.4	84.416	84.429	84.319	84.446	84.388	84.429	84.69	84.757	84.53	84.715	84.665	84.606	84.505	84.707	84.639	84.631	84.572	84.315	84.606	84.673	84.799	84.395	84.462	84.808	84.858	85.474	85.431	84.302	85.971	84.639	85.549	84.547	84.623	87.804	87.812	87.812	87.778	88.501	89.176	92.479	94.339	89.901	96.359	91.302	89.264	89.51	86.078	90.777
MN987231 IBV/ck/EGY-Monuf/USC-3/13 Egypt	86.128	83.354	83.631	83.531	83.791	83.725	83.615	83.64	83.623	83.589	83.774	83.774	83.774	83.531	83.833	83.682	83.69	83.631	83.359	83.665	83.732	83.866	83.615	83.598	83.757	83.69	84.211	83.774	83.699	85.1	83.501	84.127	83.707	83.774	85.388	85.363	85.363	85.304	86.267	86.754	86.794	87.059	86.336	85.885	86.325	86.62	86.519	85.207	86.059
KR608272 LDT3-A/03 China	83.062	89.156	89.429	89.261	88.548	87.735	87.759	87.826	87.876	88.38	88.472	88.43	88.187	88.271	88.137	88.204	88.17	88.162	87.854	88.145	88.598	87.969	87.709	87.851	87.642	87.65	87.734	87.918	87.625	85.217	89.387	87.004	87.675	87.734	85.887	85.904	85.904	85.895	83.388	83.036	83.401	82.955	83.455	82.829	82.549	83.262	83.199	85.545	82.851
MK574042 ck/CH/LHB/110615/19 China	84.917	94.439	94.908	94.984	94.537	93.948	93.644	94.031	94.158	94.655	95.009	94.95	94.461	94.773	94.562	94.925	94.933	94.883	94.547	94.917	94.723	94.023	93.837	93.821	92.961	92.607	93.837	93.618	93.382	90.685	93.239	92.446	93.618	93.694	89.164	89.173	89.173	89.164	85.836	84.951	84.85	84.475	85.364	84.684	84.21	84.896	84.951	89.467	85.129
MK574043 ck/CH/LHB/110627/19 China	84.908	94.439	94.891	94.967	94.529	93.931	93.627	94.015	94.141	94.655	94.992	94.933	94.444	94.773	94.546	94.908	94.917	94.866	94.53	94.9	94.689	94.006	93.821	93.804	92.944	92.59	93.804	93.585	93.349	90.668	93.239	92.43	93.601	93.677	89.181	89.189	89.189	89.181	85.853	84.926	84.842	84.467	85.356	84.684	84.226	84.888	84.943	89.467	85.112
MN548286 D1466/84 UK	88.39	84.787	84.656	84.648	84.825	84.624	84.791	84.867	84.783	84.791	84.976	84.968	84.833	84.884	84.766	84.698	84.707	84.639	84.382	84.673	84.816	84.951	84.681	84.766	84.892	84.96	85.221	85.28	84.639	86.308	84.96	85.229	84.648	84.732	87.061	87.061	87.061	87.028	87.939	88.352	90.444	91.526	89.22	89.526	87.902	88.559	88.4	86.693	89.642
[truncated: 52 more columns]

## Sheet: 1ab
Table S1b. Nucleotide identities between sequences in the QX dataset (n=101). Gene 1ab.
	KR822424 TCoV/080385d/08 France	OM525802 D532/9/CH/05	KX219797 ck/CH/LXJ/02I/16 China	KX252772 ck/CH/LSHH/03II/16 China	KX252778 ck/CH/LJL/05I/16 China	HQ848267 GX-YL5/05 China	KF411041 CK/CH/LGX/091109/13 China	KP118886 ck/CH/LSD/111235/14 China	KX185058 ck/CH/LGS/08I/16 China	KX219791 ck/CH/LHLJ/07I/16 China	KX219792 ck/CH/LGS/06I/16 China	KX375805 ck/CH/LJS/07V/16 China	KX252789 ck/CH/LHLJ/090605/16 China	KX252777 ck/CH/LSD/07I/16 China	KX364293 ck/CH/LJL/07III/16 China	KX219794 ck/CH/LJS/101109/16 China	KX236009 ck/CH/LSX/130132/16 China	KX259250 ck/CH/LJS/101113/16 China	KX302862 ck/CH/LJS/101111/16 China	KX364299 ck/CH/LSD/101223/16 China	KX236007 ck/CH/LSD/100408/16 China	KX219801 ck/CH/LSD/120437/16 China	MK032181 gCoV/ck/Chi/I0347/11 China	KX275391 ck/CH/LHLJ/140927/16 China	KX219800 ck/CH/LSD/130611/16 China	KX252787 ck/CH/LLN/131040/16/ China	KX252785 ck/CH/LSD/100311/16 China	KY407556 gCoV/ck/Chi/I0114/14 China	MK618759 K047-12/12 Korea	HM245924 CQ04-1/04 China	KX252779 ck/CH/LLN/06I/16 China	MK032177 gCoV/ck/Chi/I0724/17 China	MK032179 gCoV/ck/Chi/I0922/17 China	MK032180 gCoV/ck/China/I0737/17 China	OM525803 D535/4/FR/05	KY933089 1148-A/field/17 UK	MN548289 QX UK	KY933090 L1148/vaccine/17 UK	MK581205 gCoV/Ck/Pol/548/04 Poland	OM525806 D722/SK/06	OM525804 D591/2/GR/05	KX272465 AR251-15/14 Sudan	FN430414 ITA/90254/05 Italy	JQ088078 CK/SWE/065/8946/10 Sweden	KT886454 gCoV/Ck/Pol/74/09 Poland	MK581206 gCoV/Ck/Pol/195/12 Poland	OM525805 D683/HU/06	KX236001 ck/CH/LSD/03I/16 China	KP662631 ck/ZA/3665/11 South Africa
KR822424 TCoV/080385d/08 France		86.42	86.382	86.538	86.688	86.398	86.457	86.588	86.417	86.437	86.563	86.548	86.513	86.482	86.573	86.774	86.754	86.708	86.57	86.734	86.503	86.628	86.367	86.523	86.508	86.628	86.884	86.754	87.015	87.175	86.543	86.774	86.437	86.487	89.392	89.395	89.395	89.38	88.875	90.095	90.788	90.514	92.175	91.543	90.502	90.937	91.266	87.561	90.03
OM525802 D532/9/CH/05	86.42		95.564	95.816	94.77	93.971	94.293	94.408	93.78	94.137	94.348	94.308	94.333	94.951	94.886	94.192	94.202	94.157	93.992	94.187	94.429	94.74	94.288	94.308	94.811	94.378	93.911	94.303	92.891	92.111	94.348	93.891	94.308	94.373	91.53	91.542	91.542	91.527	90.169	88.245	87.712	86.982	88.411	87.533	87.481	86.619	89.21	92.169	86.975
KX219797 ck/CH/LXJ/02I/16 China	86.382	95.564		96.326	95.074	94.346	94.466	94.557	94.024	94.567	94.798	94.773	94.567	95.426	94.788	94.341	94.341	94.285	94.135	94.31	95.064	94.572	94.361	93.999	93.702	93.732	94.687	94.255	93.275	92.787	94.27	93.712	94.315	94.366	92.1	92.087	92.087	92.082	90.443	88.127	87.785	87.052	88.484	87.55	87.253	86.629	89.308	92.177	86.917
KX252772 ck/CH/LSHH/03II/16 China	86.538	95.816	96.326		96.632	95.411	95.547	95.863	94.863	95.029	95.2	95.195	94.964	95.833	95.029	94.838	94.838	94.788	94.643	94.793	95.456	95.351	95.642	95.019	94.004	93.868	94.627	95.351	94.501	92.903	94.667	93.627	94.3	94.351	93.502	93.494	93.494	93.479	91.071	88.624	88.147	87.057	88.896	87.786	87.675	86.632	89.679	93.327	87.063
KX252778 ck/CH/LJL/05I/16 China	86.688	94.77	95.074	96.632		94.597	94.723	94.939	94.285	94.109	94.315	94.331	94.341	94.738	94.692	94.175	94.215	94.14	93.98	94.14	94.697	94.436	94.798	94.265	93.853	93.788	93.868	94.421	93.572	92.501	93.843	93.667	94.346	94.411	92.592	92.58	92.58	92.565	90.699	88.659	88.484	87.182	89.107	87.987	87.941	86.898	89.348	92.785	87.314
HQ848267 GX-YL5/05 China	86.398	93.971	94.346	95.411	94.597		97.834	97.125	96.708	96.371	96.597	96.557	96.331	95.482	96.678	96.442	96.462	96.391	96.256	96.437	96.326	96.527	97.1	97.02	96.125	95.512	94.949	96.844	95.778	94.828	93.517	95.633	96.336	96.396	92.336	92.329	92.329	92.314	90.037	88.142	87.414	86.766	88.163	87.285	87.248	86.5	89.052	91.398	87.013
KF411041 CK/CH/LGX/091109/13 China	86.457	94.293	94.466	95.547	94.723	97.834		97.321	96.763	96.14	96.351	96.301	96.185	95.24	96.854	96.115	96.13	96.054	95.929	96.07	96.452	96.602	97.17	97.185	96.366	96.16	94.833	97.587	95.818	94.924	93.667	95.964	96.658	96.728	92.592	92.585	92.585	92.57	90.418	88.182	87.72	87.112	88.363	87.555	87.484	86.557	89.448	91.564	87.023
KP118886 ck/CH/LSD/111235/14 China	86.588	94.408	94.557	95.863	94.939	97.125	97.321		96.16	96.889	97.11	97.075	96.793	96.17	96.532	96.532	96.542	96.492	96.352	96.517	96.808	97.904	98.256	96.698	95.959	95.507	95.089	96.889	95.808	94.245	93.421	95.009	95.713	95.773	92.783	92.796	92.796	92.776	90.559	88.549	87.896	87.036	88.609	87.776	87.448	86.521	89.318	91.669	87.103
KX185058 ck/CH/LGS/08I/16 China	86.417	93.78	94.024	94.863	94.285	96.708	96.763	96.16		96.366	96.587	96.547	96.356	95.652	97.04	96.296	96.321	96.251	96.115	96.281	96.175	96.22	96.678	96.894	96.286	96.065	94.959	96.155	95.049	94.16	93.637	96.039	96.678	96.748	91.964	91.957	91.957	91.952	89.83	88.062	87.268	86.74	87.8	87.219	87.087	86.479	88.81	91.121	86.902
KX219791 ck/CH/LHLJ/07I/16 China	86.437	94.137	94.567	95.029	94.109	96.371	96.14	96.889	96.366		99.457	99.427	98.985	97.638	97.18	97.15	97.165	97.1	96.97	97.16	97.995	96.768	96.683	95.763	95.672	95.265	95.969	95.27	95.175	94.351	93.451	95.301	95.964	96.024	92.185	92.198	92.198	92.183	90.202	88.372	87.649	86.765	88.268	87.43	87.308	86.416	88.951	91.518	86.992
KX219792 ck/CH/LGS/06I/16 China	86.563	94.348	94.798	95.2	94.315	96.597	96.351	97.11	96.587	99.457		99.719	99.186	97.859	97.401	97.356	97.371	97.316	97.176	97.356	98.211	96.964	96.899	95.999	95.894	95.446	96.17	95.446	95.431	94.582	93.632	95.517	96.2	96.261	92.321	92.324	92.324	92.308	90.333	88.539	87.805	86.896	88.418	87.585	87.348	86.516	89.066	91.634	87.138
KX375805 ck/CH/LJS/07V/16 China	86.548	94.308	94.773	95.195	94.331	96.557	96.301	97.075	96.547	99.427	99.719		99.146	97.834	97.351	97.291	97.326	97.241	97.131	97.291	98.155	96.954	96.874	95.939	95.879	95.416	96.18	95.421	95.361	94.542	93.622	95.512	96.17	96.24	92.291	92.293	92.293	92.278	90.333	88.514	87.75	86.856	88.398	87.56	87.303	86.511	89.081	91.594	87.103
KX252789 ck/CH/LHLJ/090605/16 China	86.513	94.333	94.567	94.964	94.341	96.331	96.185	96.793	96.356	98.985	99.186	99.146		97.371	97.412	97.04	97.055	96.989	96.859	97.05	97.763	96.663	96.683	95.828	95.919	95.456	96.044	95.265	95.24	94.426	93.521	95.476	96.13	96.19	92.02	92.022	92.022	92.007	90.252	88.463	87.705	86.79	88.348	87.5	87.288	86.436	88.966	91.574	87.017
KX252777 ck/CH/LSD/07I/16 China	86.482	94.951	95.426	95.833	94.738	95.482	95.24	96.17	95.652	97.638	97.859	97.834	97.371		95.889	96.029	96.065	95.979	95.859	96.029	96.537	96.14	96.049	94.974	94.818	94.421	96.256	94.979	94.723	93.627	93.848	94.381	95.059	95.12	92.361	92.374	92.374	92.359	90.398	88.408	87.624	86.685	88.373	87.455	87.177	86.526	89.071	91.87	86.917
KX364293 ck/CH/LJL/07III/16 China	86.573	94.886	94.788	95.029	94.692	96.678	96.854	96.532	97.04	97.18	97.401	97.351	97.412	95.889		97.185	97.236	97.14	97.005	97.2	97.497	96.678	96.688	96.793	96.467	96.441	95.27	96.17	95.1	94.697	94.341	96.743	97.412	97.482	92.105	92.097	92.097	92.092	90.217	88.227	87.82	87.248	88.398	87.641	87.554	86.592	89.237	91.348	87.113
KX219794 ck/CH/LJS/101109/16 China	86.774	94.192	94.341	94.838	94.175	96.442	96.115	96.532	96.296	97.15	97.356	97.291	97.04	96.029	97.185		99.905	99.879	99.678	99.864	97.874	96.431	96.235	96.346	95.788	95.592	94.979	95.441	95.125	94.054	93.632	96.07	96.763	96.823	91.909	91.912	91.912	91.886	89.835	88.172	87.398	86.74	88.056	87.314	87.132	86.705	88.71	91.162	87.364
KX236009 ck/CH/LSX/130132/16 China	86.754	94.202	94.341	94.838	94.215	96.462	96.13	96.542	96.321	97.165	97.371	97.326	97.055	96.065	97.236	99.905		99.864	99.663	99.859	97.879	96.447	96.251	96.351	95.803	95.597	94.994	95.436	95.15	94.054	93.632	96.11	96.793	96.864	91.929	91.922	91.922	91.907	89.815	88.162	87.378	86.74	88.051	87.314	87.117	86.68	88.705	91.177	87.354
KX259250 ck/CH/LJS/101113/16 China	86.708	94.157	94.285	94.788	94.14	96.391	96.054	96.492	96.251	97.1	97.316	97.241	96.989	95.979	97.14	99.879	99.864		99.628	99.814	97.834	96.376	96.19	96.296	95.728	95.542	94.919	95.381	95.084	93.989	93.582	96.014	96.708	96.768	91.854	91.856	91.856	91.831	89.78	88.112	87.328	86.68	88.006	87.264	87.087	86.64	88.659	91.111	87.304
KX302862 ck/CH/LJS/101111/16 China	86.57	93.992	94.135	94.643	93.98	96.256	95.929	96.352	96.115	96.97	97.176	97.131	96.859	95.859	97.005	99.678	99.663	99.628		99.613	97.698	96.241	96.055	96.166	95.603	95.387	94.794	95.231	94.929	93.869	93.452	95.884	96.568	96.638	91.724	91.727	91.727	91.702	89.676	87.988	87.214	86.551	87.872	87.125	86.948	86.516	88.546	90.982	87.195
KX364299 ck/CH/LSD/101223/16 China	86.734	94.187	94.31	94.793	94.14	96.437	96.07	96.517	96.281	97.16	97.356	97.291	97.05	96.029	97.2	99.864	99.859	99.814	99.613		97.849	96.411	96.215	96.331	95.763	95.572	94.944	95.406	95.115	94.029	93.577	96.044	96.738	96.798	91.884	91.886	91.886	91.861	89.805	88.162	87.368	86.72	88.041	87.294	87.112	86.66	88.705	91.137	87.339
KX236007 ck/CH/LSD/100408/16 China	86.503	94.429	95.064	95.456	94.697	96.326	96.452	96.808	96.175	97.995	98.211	98.155	97.763	96.537	97.497	97.874	97.879	97.834	97.698	97.849		96.648	96.447	95.949	95.617	95.482	95.356	95.542	95.064	94.632	93.551	95.567	96.251	96.321	92.738	92.73	92.73	92.715	90.76	88.629	88.237	87.383	88.875	87.982	87.745	86.532	89.458	91.855	87.168
KX219801 ck/CH/LSD/120437/16 China	86.628	94.74	94.572	95.351	94.436	96.527	96.602	97.904	96.22	96.768	96.964	96.954	96.663	96.14	96.678	96.431	96.447	96.376	96.241	96.411	96.648		97.99	96.517	96.426	95.813	95.175	96.251	95.331	94.074	93.541	95.708	96.361	96.421	92.18	92.178	92.178	92.163	90.287	88.393	87.655	87.057	88.388	87.701	87.418	86.607	89.252	91.287	86.972
MK032181 gCoV/ck/Chi/I0347/11 China	86.367	94.288	94.361	95.642	94.798	97.1	97.17	98.256	96.678	96.683	96.899	96.874	96.683	96.049	96.688	96.235	96.251	96.19	96.055	96.215	96.447	97.99		97.291	96.467	95.637	95.25	96.834	96.019	93.989	93.617	95.582	96.276	96.326	92.376	92.374	92.374	92.369	90.237	88.252	87.524	86.7	88.232	87.274	87.217	86.461	89.031	91.217	86.892
KX275391 ck/CH/LHLJ/140927/16 China	86.523	94.308	93.999	95.019	94.265	97.02	97.185	96.698	96.894	95.763	95.999	95.939	95.828	94.974	96.793	96.346	96.351	96.296	96.166	96.331	95.949	96.517	97.291		96.849	96.276	94.471	96.798	95.371	94.165	93.521	96.276	96.914	96.974	91.894	91.886	91.886	91.871	89.875	87.966	87.338	86.825	88.102	87.294	87.248	86.499	88.931	90.9	86.907
KX219800 ck/CH/LSD/130611/16 China	86.508	94.811	93.702	94.004	93.853	96.125	96.366	95.959	96.286	95.672	95.894	95.879	95.919	94.818	96.467	95.788	95.803	95.728	95.603	95.763	95.617	96.426	96.467	96.849		97.688	94.622	95.743	94.496	94.124	93.22	96.974	97.472	97.547	91.075	91.068	91.068	91.042	89.875	88.087	87.423	86.876	88.152	87.41	87.363	86.574	88.911	90.86	86.997
KX252787 ck/CH/LLN/131040/16/ China	86.628	94.378	93.732	93.868	93.788	95.512	96.16	95.507	96.065	95.265	95.446	95.416	95.456	94.421	96.441	95.592	95.597	95.542	95.387	95.572	95.482	95.813	95.637	96.276	97.688		94.15	95.758	94.034	93.918	93.109	96.954	97.417	97.482	91.171	91.173	91.173	91.158	89.951	88.067	87.665	87.152	88.363	87.565	87.499	86.677	89.167	90.961	87.063
KX252785 ck/CH/LSD/100311/16 China	86.884	93.911	94.687	94.627	93.868	94.949	94.833	95.089	94.959	95.969	96.17	96.18	96.044	96.256	95.27	94.979	94.994	94.919	94.794	94.944	95.356	95.175	95.25	94.471	94.622	94.15		94.552	93.938	93.592	93.506	94.145	94.793	94.853	91.301	91.294	91.294	91.289	90.468	88.604	87.71	87.569	88.418	87.776	87.338	86.949	89.182	91.815	87.098
KY407556 gCoV/ck/Chi/I0114/14 China	86.754	94.303	94.255	95.351	94.421	96.844	97.587	96.889	96.155	95.27	95.446	95.421	95.265	94.979	96.17	95.441	95.436	95.381	95.231	95.406	95.542	96.251	96.834	96.798	95.743	95.758	94.552		95.074	93.969	93.667	95.296	96.009	96.06	92.728	92.72	92.72	92.705	90.488	88.453	88.087	87.69	88.373	88.078	87.559	86.763	89.689	91.428	87.5
MK618759 K047-12/12 Korea	87.015	92.891	93.275	94.501	93.572	95.778	95.818	95.808	95.049	95.175	95.431	95.361	95.24	94.723	95.1	95.125	95.15	95.084	94.929	95.115	95.064	95.331	96.019	95.371	94.496	94.034	93.938	95.074		92.767	92.541	93.944	94.637	94.707	90.985	90.997	90.997	90.972	88.901	88.056	87.062	86.661	87.84	86.852	86.71	87.029	87.815	90.242	87.304
HM245924 CQ04-1/04 China	87.175	92.111	92.787	92.903	92.501	94.828	94.924	94.245	94.16	94.351	94.582	94.542	94.426	93.627	94.697	94.054	94.054	93.989	93.869	94.029	94.632	94.074	93.989	94.165	94.124	93.918	93.592	93.969	92.767		91.722	93.682	94.401	94.456	92.01	92.017	92.017	91.992	91.192	89.162	88.87	88.207	89.267	88.54	88.504	87.31	90.212	93.202	87.942
KX252779 ck/CH/LLN/06I/16 China	86.543	94.348	94.27	94.667	93.843	93.517	93.667	93.421	93.637	93.451	93.632	93.622	93.521	93.848	94.341	93.632	93.632	93.582	93.452	93.577	93.551	93.541	93.617	93.521	93.22	93.109	93.506	93.667	92.541	91.722		93.265	93.833	93.893	90.939	90.932	90.932	90.927	89.86	88.122	87.544	86.864	88.262	87.344	87.062	86.627	89.036	91.468	87.244
MK032177 gCoV/ck/Chi/I0724/17 China	86.774	93.891	93.712	93.627	93.667	95.633	95.964	95.009	96.039	95.301	95.517	95.512	95.476	94.381	96.743	96.07	96.11	96.014	95.884	96.044	95.567	95.708	95.582	96.276	96.974	96.954	94.145	95.296	93.944	93.682	93.265		99.085	99.151	90.849	90.841	90.841	90.826	90.162	88.524	87.805	87.549	88.519	87.811	87.675	86.961	89.453	90.644	87.505
MK032179 gCoV/ck/Chi/I0922/17 China	86.437	94.308	94.315	94.3	94.346	96.336	96.658	95.713	96.678	95.964	96.2	96.17	96.13	95.059	97.412	96.763	96.793	96.708	96.568	96.738	96.251	96.361	96.276	96.914	97.472	97.417	94.793	96.009	94.637	94.401	93.833	99.085		99.915	91.542	91.525	91.525	91.51	90.187	88.162	87.499	86.956	88.152	87.475	87.353	86.494	89.092	91.338	87.002
MK032180 gCoV/ck/China/I0737/17 China	86.487	94.373	94.366	94.351	94.411	96.396	96.728	95.773	96.748	96.024	96.261	96.24	96.19	95.12	97.482	96.823	96.864	96.768	96.638	96.798	96.321	96.421	96.326	96.974	97.547	97.482	94.853	96.06	94.707	94.456	93.893	99.151	99.915		91.593	91.575	91.575	91.56	90.237	88.212	87.549	87.016	88.217	87.525	87.398	86.534	89.142	91.398	87.068
OM525803 D535/4/FR/05	89.392	91.53	92.1	93.502	92.592	92.336	92.592	92.783	91.964	92.185	92.321	92.291	92.02	92.361	92.105	91.909	91.929	91.854	91.724	91.884	92.738	92.18	92.376	91.894	91.075	91.171	91.301	92.728	90.985	92.01	90.939	90.849	91.542	91.593		99.867	99.867	99.816	94.403	91.517	90.029	89.255	90.978	89.869	90.939	89.175	92.471	92.657	88.642
KY933089 1148-A/field/17 UK	89.395	91.542	92.087	93.494	92.58	92.329	92.585	92.796	91.957	92.198	92.324	92.293	92.022	92.374	92.097	91.912	91.922	91.856	91.727	91.886	92.73	92.178	92.374	91.886	91.068	91.173	91.294	92.72	90.997	92.017	90.932	90.841	91.525	91.575	99.867		100	99.94	94.385	91.51	90.032	89.263	90.991	89.876	90.931	89.167	92.488	92.659	88.649
MN548289 QX UK	89.395	91.542	92.087	93.494	92.58	92.329	92.585	92.796	91.957	92.198	92.324	92.293	92.022	92.374	92.097	91.912	91.922	91.856	91.727	91.886	92.73	92.178	92.374	91.886	91.068	91.173	91.294	92.72	90.997	92.017	90.932	90.841	91.525	91.575	99.867	100		99.94	94.385	91.51	90.032	89.263	90.991	89.876	90.931	89.167	92.488	92.659	88.649
KY933090 L1148/vaccine/17 UK	89.38	91.527	92.082	93.479	92.565	92.314	92.57	92.776	91.952	92.183	92.308	92.278	92.007	92.359	92.092	91.886	91.907	91.831	91.702	91.861	92.715	92.163	92.369	91.871	91.042	91.158	91.289	92.705	90.972	91.992	90.927	90.826	91.51	91.56	99.816	99.94	99.94		94.34	91.484	90.012	89.232	90.956	89.846	90.901	89.142	92.468	92.634	88.654
MK581205 gCoV/Ck/Pol/548/04 Poland	88.875	90.169	90.443	91.071	90.699	90.037	90.418	90.559	89.83	90.202	90.333	90.333	90.252	90.398	90.217	89.835	89.815	89.78	89.676	89.805	90.76	90.287	90.237	89.875	89.875	89.951	90.468	90.488	88.901	91.192	89.86	90.162	90.187	90.237	94.403	94.385	94.385	94.34		93.669	90.617	89.608	91.074	90.275	92.216	92.488	92.667	92.251	89.073
OM525806 D722/SK/06	90.095	88.245	88.127	88.624	88.659	88.142	88.182	88.549	88.062	88.372	88.539	88.514	88.463	88.408	88.227	88.172	88.162	88.112	87.988	88.162	88.629	88.393	88.252	87.966	88.087	88.067	88.604	88.453	88.056	89.162	88.122	88.524	88.162	88.212	91.517	91.51	91.51	91.484	93.669		91.522	90.598	91.556	91.12	93.181	92.09	91.043	89.868	89.967
OM525804 D591/2/GR/05	90.788	87.712	87.785	88.147	88.484	87.414	87.72	87.896	87.268	87.649	87.805	87.75	87.705	87.624	87.82	87.398	87.378	87.328	87.214	87.368	88.237	87.655	87.524	87.338	87.423	87.665	87.71	88.087	87.062	88.87	87.544	87.805	87.499	87.549	90.029	90.032	90.032	90.012	90.617	91.522		94.574	92.667	93.236	91.753	90.579	91.138	89.342	92.35
KX272465 AR251-15/14 Sudan	90.514	86.982	87.052	87.057	87.182	86.766	87.112	87.036	86.74	86.765	86.896	86.856	86.79	86.685	87.248	86.74	86.74	86.68	86.551	86.72	87.383	87.057	86.7	86.825	86.876	87.152	87.569	87.69	86.661	88.207	86.864	87.549	86.956	87.016	89.255	89.263	89.263	89.232	89.608	90.598	94.574		91.512	94.141	91.996	90.279	90.644	88.317	91.949
FN430414 ITA/90254/05 Italy	92.175	88.411	88.484	88.896	89.107	88.163	88.363	88.609	87.8	88.268	88.418	88.398	88.348	88.373	88.398	88.056	88.051	88.006	87.872	88.041	88.875	88.388	88.232	88.102	88.152	88.363	88.418	88.373	87.84	89.267	88.262	88.519	88.152	88.217	90.978	90.991	90.991	90.956	91.074	91.556	92.667	91.512		93.291	91.913	90.523	91.923	89.779	90.953
JQ088078 CK/SWE/065/8946/10 Sweden	91.543	87.533	87.55	87.786	87.987	87.285	87.555	87.776	87.219	87.43	87.585	87.56	87.5	87.455	87.641	87.314	87.314	87.264	87.125	87.294	87.982	87.701	87.274	87.294	87.41	87.565	87.776	88.078	86.852	88.54	87.344	87.811	87.475	87.525	89.869	89.876	89.876	89.846	90.275	91.12	93.236	94.141	93.291		93.673	89.994	91.165	88.725	91.044
KT886454 gCoV/Ck/Pol/74/09 Poland	90.502	87.481	87.253	87.675	87.941	87.248	87.484	87.448	87.087	87.308	87.348	87.303	87.288	87.177	87.554	87.132	87.117	87.087	86.948	87.112	87.745	87.418	87.217	87.248	87.363	87.499	87.338	87.559	86.71	88.504	87.062	87.675	87.353	87.398	90.939	90.931	90.931	90.901	92.216	93.181	91.753	91.996	91.913	93.673		91.653	90.486	88.764	89.546
MK581206 gCoV/Ck/Pol/195/12 Poland	90.937	86.619	86.629	86.632	86.898	86.5	86.557	86.521	86.479	86.416	86.516	86.511	86.436	86.526	86.592	86.705	86.68	86.64	86.516	86.66	86.532	86.607	86.461	86.499	86.574	86.677	86.949	86.763	87.029	87.31	86.627	86.961	86.494	86.534	89.175	89.167	89.167	89.142	92.488	92.09	90.579	90.279	90.523	89.994	91.653		89.847	87.827	90.232
OM525805 D683/HU/06	91.266	89.21	89.308	89.679	89.348	89.052	89.448	89.318	88.81	88.951	89.066	89.081	88.966	89.071	89.237	88.71	88.705	88.659	88.546	88.705	89.458	89.252	89.031	88.931	88.911	89.167	89.182	89.689	87.815	90.212	89.036	89.453	89.092	89.142	92.471	92.488	92.488	92.468	92.667	91.043	91.138	90.644	91.923	91.165	90.486	89.847		90.854	89.928
KX236001 ck/CH/LSD/03I/16 China	87.561	92.169	92.177	93.327	92.785	91.398	91.564	91.669	91.121	91.518	91.634	91.594	91.574	91.87	91.348	91.162	91.177	91.111	90.982	91.137	91.855	91.287	91.217	90.9	90.86	90.961	91.815	91.428	90.242	93.202	91.468	90.644	91.338	91.398	92.657	92.659	92.659	92.634	92.251	89.868	89.342	88.317	89.779	88.725	88.764	87.827	90.854		88.907
KP662631 ck/ZA/3665/11 South Africa	90.03	86.975	86.917	87.063	87.314	87.013	87.023	87.103	86.902	86.992	87.138	87.103	87.017	86.917	87.113	87.364	87.354	87.304	87.195	87.339	87.168	86.972	86.892	86.907	86.997	87.063	87.098	87.5	87.304	87.942	87.244	87.505	87.002	87.068	88.642	88.649	88.649	88.654	89.073	89.967	92.35	91.949	90.953	91.044	89.546	90.232	89.928	88.907
KF377577 4/91 vaccine China	90.915	86.047	85.896	85.991	86.142	86.042	86.117	86.253	86.228	86.177	86.313	86.288	86.192	86.167	86.172	86.82	86.8	86.745	86.621	86.78	86.212	86.293	86.006	86.182	86.258	86.363	87.031	86.71	86.656	86.996	86.19	86.956	86.157	86.217	87.958	87.956	87.956	87.935	88.401	89.583	92.396	93.901	89.904	93.689	91.051	90.852	89.075	87.05	90.904
KP118881 ck/CH/LBJ/140413/14 China	90.946	86.067	85.916	86.011	86.162	86.062	86.137	86.263	86.248	86.202	86.338	86.313	86.217	86.192	86.192	86.846	86.825	86.77	86.647	86.805	86.233	86.313	86.027	86.192	86.278	86.383	87.057	86.73	86.656	87.016	86.2	86.976	86.177	86.238	87.978	87.976	87.976	87.956	88.421	89.583	92.406	93.936	89.914	93.699	91.061	90.867	89.115	87.07	90.924
KP118880 ck/CH/LHB/130927/14 China	90.93	86.032	85.881	85.976	86.122	86.027	86.102	86.217	86.212	86.157	86.293	86.268	86.172	86.147	86.142	86.81	86.79	86.735	86.611	86.77	86.197	86.268	85.981	86.167	86.243	86.358	87.006	86.695	86.62	86.981	86.16	86.941	86.142	86.202	87.943	87.94	87.94	87.92	88.381	89.558	92.38	93.906	89.899	93.684	91.041	90.842	89.085	87.035	90.904
KP118888 ck/CH/LLN/130102/15 China	90.946	86.052	85.901	85.996	86.147	86.047	86.122	86.238	86.233	86.177	86.313	86.288	86.192	86.167	86.167	86.83	86.81	86.755	86.631	86.79	86.217	86.288	86.001	86.187	86.263	86.368	87.031	86.715	86.641	87.001	86.185	86.961	86.162	86.222	87.963	87.961	87.961	87.94	88.406	89.578	92.406	93.926	89.914	93.699	91.061	90.867	89.105	87.055	90.924
MZ367369 IBV/Ck/Bel/4134_001/19 Belgium	90.956	86.062	85.911	86.006	86.157	86.057	86.132	86.248	86.243	86.187	86.323	86.298	86.202	86.177	86.177	86.841	86.82	86.765	86.642	86.8	86.228	86.298	86.011	86.197	86.273	86.378	87.042	86.725	86.651	87.011	86.195	86.971	86.172	86.233	87.973	87.971	87.971	87.951	88.416	89.588	92.416	93.936	89.924	93.709	91.071	90.877	89.115	87.065	90.934
KP118884 ck/CH/LSD/110651/15 China	90.915	86.037	85.891	85.986	86.137	86.037	86.112	86.238	86.222	86.177	86.313	86.288	86.192	86.167	86.172	86.82	86.8	86.745	86.621	86.78	86.207	86.288	86.001	86.182	86.258	86.348	87.031	86.705	86.63	86.991	86.185	86.966	86.167	86.217	87.948	87.946	87.946	87.925	88.391	89.563	92.386	93.906	89.904	93.679	91.041	90.837	89.085	87.045	90.894
KP118882 ck/CH/LBJ/140402/14 China	90.925	86.062	85.911	86.006	86.157	86.057	86.132	86.248	86.243	86.187	86.323	86.298	86.202	86.177	86.177	86.841	86.82	86.765	86.642	86.8	86.228	86.298	86.011	86.197	86.273	86.383	87.042	86.725	86.646	87.011	86.195	86.971	86.172	86.233	87.973	87.971	87.971	87.951	88.416	89.583	92.406	93.916	89.914	93.699	91.061	90.862	89.095	87.065	90.914
KP118892 ck/CH/LLN/120101 China	90.93	86.047	85.896	85.991	86.142	86.042	86.117	86.253	86.228	86.172	86.308	86.283	86.187	86.162	86.162	86.825	86.805	86.75	86.626	86.785	86.212	86.283	85.996	86.182	86.258	86.363	87.026	86.72	86.646	86.996	86.17	86.956	86.157	86.217	87.958	87.956	87.956	87.935	88.391	89.573	92.401	93.906	89.899	93.684	91.046	90.852	89.08	87.05	90.919
KP118891 ck/CH/LHLJ/111246/14 China	90.9	86.037	85.896	85.981	86.132	86.032	86.107	86.222	86.217	86.172	86.308	86.283	86.187	86.142	86.162	86.825	86.805	86.75	86.626	86.785	86.222	86.273	85.986	86.172	86.248	86.353	87.026	86.69	86.636	86.986	86.18	86.946	86.147	86.207	87.943	87.94	87.94	87.92	88.366	89.542	92.38	93.886	89.879	93.674	91.026	90.827	89.055	87.04	90.889
KP118893 ck/CH/LSD/110410/14 China	90.905	86.032	85.881	85.976	86.127	86.027	86.102	86.217	86.212	86.157	86.293	86.268	86.172	86.147	86.147	86.81	86.79	86.735	86.611	86.77	86.207	86.268	85.981	86.167	86.243	86.348	87.021	86.695	86.62	86.981	86.165	86.941	86.142	86.202	87.943	87.94	87.94	87.92	88.386	89.558	92.375	93.901	89.884	93.679	91.041	90.847	89.075	87.035	90.894
KP036503 ck/CH/LHB/121010 China	90.956	86.062	85.901	86.006	86.157	86.047	86.122	86.238	86.243	86.187	86.323	86.298	86.202	86.177	86.167	86.83	86.81	86.755	86.631	86.79	86.217	86.298	86.011	86.187	86.273	86.368	87.042	86.725	86.651	87.001	86.175	86.961	86.172	86.233	87.963	87.961	87.961	87.94	88.396	89.568	92.396	93.891	89.924	93.679	91.051	90.842	89.095	87.075	90.914
KP036504 ck/CH/LHB/130630 China	90.895	86.032	85.871	85.976	86.127	86.007	86.082	86.207	86.192	86.147	86.283	86.258	86.162	86.147	86.127	86.8	86.78	86.725	86.601	86.76	86.187	86.258	85.961	86.157	86.233	86.328	87.001	86.675	86.62	86.971	86.155	86.931	86.132	86.192	87.943	87.94	87.94	87.91	88.376	89.548	92.375	93.881	89.899	93.679	91.031	90.822	89.055	87.035	90.874
KP118883 ck/CH/LHB/121041 China	90.89	86.032	85.876	85.981	86.132	86.017	86.092	86.207	86.202	86.147	86.283	86.258	86.162	86.132	86.137	86.8	86.78	86.725	86.601	86.76	86.187	86.258	85.991	86.167	86.233	86.338	87.006	86.685	86.625	86.946	86.17	86.931	86.132	86.192	87.908	87.905	87.905	87.885	88.341	89.517	92.345	93.866	89.864	93.639	91.001	90.807	89.04	86.995	90.869
KP118887 ck/CH/LHB/140532/14 China	90.907	86.029	85.878	85.973	86.124	86.024	86.109	86.215	86.209	86.154	86.29	86.275	86.169	86.144	86.144	86.807	86.787	86.732	86.618	86.767	86.194	86.265	85.978	86.174	86.24	86.345	87.008	86.692	86.617	86.968	86.162	86.938	86.139	86.199	87.93	87.927	87.927	87.907	88.373	89.544	92.367	93.882	89.875	93.66	91.012	90.823	89.067	87.022	90.885
KP118885 ck/CH/LSD/110857/14 China	91.242	86.112	86.016	86.067	86.177	86.143	86.248	86.343	86.253	86.313	86.449	86.423	86.323	86.283	86.283	86.941	86.921	86.866	86.737	86.901	86.323	86.378	86.117	86.217	86.258	86.368	87.152	86.815	86.781	87.087	86.336	86.961	86.248	86.308	88.033	88.031	88.031	88.011	88.482	90.156	92.652	94.325	90.236	93.95	91.297	91.119	89.306	87.095	91.371
KP036502 ck/CH/LHLJ/140906 China	91.021	86.148	86.072	86.122	86.233	86.218	86.278	86.383	86.303	86.378	86.504	86.469	86.358	86.373	86.333	87.042	87.021	86.966	86.827	87.001	86.378	86.428	86.152	86.308	86.318	86.378	87.102	86.851	86.872	87.157	86.542	87.011	86.288	86.348	88.089	88.096	88.096	88.076	88.567	90.161	92.401	94.325	90.442	94.01	91.448	90.902	89.593	87.151	91.502
KJ135013 IBVUkr27/11 Ukraine	91.011	86.112	85.981	86.032	86.147	86.153	86.243	86.308	86.248	86.288	86.423	86.388	86.278	86.273	86.263	86.896	86.866	86.82	86.687	86.856	86.318	86.368	86.077	86.243	86.212	86.338	87.052	86.8	86.786	87.097	86.467	86.941	86.217	86.278	88.023	88.031	88.031	88.011	88.477	90.04	92.743	94.4	90.482	93.724	91.156	90.963	89.377	87.06	91.683
KJ425496 ck/CH/LHB/130573 China	90.996	86.489	86.388	86.444	86.524	86.54	86.574	86.614	86.459	86.574	86.67	86.619	86.529	86.514	86.574	86.685	86.655	86.604	86.476	86.64	86.524	86.599	86.459	86.484	86.499	86.589	86.876	87.092	87.254	87.489	86.944	87.202	86.494	86.544	88.28	88.297	88.297	88.287	88.708	90.342	93.86	94.35	90.668	91.644	89.849	90.721	89.97	87.774	93.331
KP343691 ck/CH/LGX/130530 China	90.343	86.881	86.941	86.961	87.001	87.183	87.097	87.142	86.981	87.187	87.318	87.273	87.182	87.147	87.132	86.886	86.861	86.81	86.692	86.846	87.001	87.077	87.016	87.122	87.006	87.082	87.584	87.685	86.907	88.006	87.502	87.845	87.122	87.172	88.808	88.815	88.815	88.805	89.236	90.82	94.394	94.778	91.221	92.176	90.427	90.385	90.332	88.211	93.447
KT736032 ck/CHLDL150434-II/16 China	90.89	86.58	86.519	86.544	86.614	86.716	86.74	86.77	86.584	86.66	86.77	86.735	86.645	86.619	86.68	86.75	86.725	86.675	86.546	86.71	86.624	86.71	86.574	86.715	86.604	86.71	86.991	87.248	87.364	87.634	86.994	87.323	86.609	86.66	88.405	88.423	88.423	88.413	88.844	90.473	93.951	94.471	90.804	91.749	90	90.867	90.106	87.879	93.507
KU356856 ck/CH/SCYB/140913/25 China	90.624	86.494	86.534	86.579	86.619	86.856	86.79	86.886	86.685	86.936	87.077	87.036	86.906	86.866	86.81	86.614	86.599	86.539	86.415	86.579	86.795	86.785	86.66	86.856	86.655	86.805	87.253	87.368	86.882	87.745	87.004	87.494	86.77	86.82	88.466	88.488	88.488	88.478	88.849	90.488	94.534	95.242	91.165	92.674	90.488	90.586	90.131	87.714	92.412
MT505388 CK/CH/SCMY/160315/20 China	90.134	86.788	86.928	86.923	86.933	87.21	87.129	87.2	87.029	87.25	87.391	87.351	87.215	87.215	87.155	86.938	86.923	86.863	86.74	86.903	87.109	87.114	87.054	87.195	87.054	87.155	87.647	87.763	86.957	88.069	87.389	87.823	87.124	87.175	88.815	88.828	88.828	88.818	89.208	90.832	94.235	95.063	91.444	92.927	90.737	90.131	90.118	88.023	92.424
KJ425497 ck/CH/LHB/130598/14 China	91.046	86.519	86.423	86.484	86.564	86.58	86.614	86.655	86.489	86.604	86.7	86.65	86.559	86.544	86.604	86.725	86.695	86.645	86.516	86.68	86.564	86.629	86.489	86.514	86.514	86.604	86.906	87.132	87.294	87.529	86.984	87.237	86.514	86.564	88.32	88.338	88.338	88.328	88.763	90.402	93.905	94.425	90.718	91.684	89.91	90.812	90.01	87.814	93.412
FN430415 NGA/A116E7/06 Nigeria	92.064	86.74	86.67	86.815	86.946	86.695	86.77	86.75	86.594	86.725	86.876	86.825	86.785	86.835	86.73	86.906	86.876	86.835	86.697	86.881	86.755	86.815	86.675	86.77	86.81	86.705	87.172	86.951	87.197	87.594	86.83	87.072	86.71	86.76	89.029	89.021	89.021	89.026	89.013	90.083	91.204	90.944	91.898	90.672	90.234	90.39	90.732	87.985	90.777
KR231009 B1648/84 Belgium	92.627	86.532	86.725	86.635	86.67	86.585	86.609	86.67	86.469	86.643	86.74	86.72	86.629	86.675	86.604	87.082	87.062	87.011	86.893	87.052	86.619	86.715	86.554	86.715	86.66	86.7	87.016	87.021	87.087	87.454	86.604	86.936	86.609	86.66	88.808	88.795	88.795	88.78	88.656	90.124	90.847	91.045	91.953	91.195	90.38	90.538	90.31	87.704	90.606
MN548285 CR88 (4/91)/88 France	93.485	86.858	86.886	86.896	86.941	86.821	86.941	86.891	86.851	86.835	86.971	86.916	86.825	86.906	86.916	86.966	86.961	86.911	86.777	86.946	86.896	86.946	86.72	86.876	86.846	86.996	87.323	87.323	87.474	87.84	87.067	87.132	86.82	86.871	89.094	89.091	89.091	89.101	88.953	90.501	91.812	91.758	91.893	91.326	90.48	90.568	91.084	88.186	91.229
MN548288 Italy02/02 Italy	93.873	87.009	86.815	86.996	87.162	86.957	86.971	86.961	86.79	86.815	86.951	86.901	86.921	86.921	86.931	87.047	87.047	86.981	86.848	87.011	86.841	86.946	86.81	86.976	86.901	87.026	87.338	87.077	87.634	87.634	86.981	87.157	86.82	86.876	89.2	89.192	89.192	89.177	89.008	90.209	91.059	90.783	92.868	91.612	90.822	90.847	90.983	87.93	90.365
MG021194 gCoV/Ck/IT/624I/96 Italy	91.959	87.034	86.966	87.016	87.253	87.087	87.062	87.147	86.941	87.117	87.258	87.248	87.117	87.137	87.102	87.308	87.308	87.242	87.129	87.273	87.112	87.132	87.047	87.162	87.172	87.187	87.242	87.358	87.722	88.026	87.362	87.348	87.042	87.097	88.622	88.619	88.619	88.619	88.797	90.159	91.39	91.193	93.049	91.316	90.717	90.39	90.601	88.08	91.345
KU900739 QIA-03342/03 Korea	91.884	87.195	87.177	87.132	87.308	87.183	87.258	87.268	87.162	87.092	87.253	87.222	87.182	87.182	87.207	87.242	87.227	87.177	87.028	87.212	87.122	87.293	87.082	87.212	87.162	87.293	87.514	87.584	88.624	88.001	87.353	87.454	87.182	87.237	89.099	89.102	89.102	89.066	89.274	90.295	91.229	90.678	91.42	91.19	90.355	90.656	90.692	88.261	90.571
KU900744 QIA-Q43/06 Korea	91.572	87.009	87.057	86.981	87.162	87.012	87.042	86.956	86.951	86.846	87.006	86.966	86.971	86.936	87.102	87.087	87.092	87.036	86.878	87.062	86.966	87.067	86.76	86.966	86.966	87.117	87.288	87.328	88.268	87.815	87.242	87.318	87.062	87.112	88.943	88.941	88.941	88.921	89.103	90.063	91.109	90.618	91.204	90.979	90.184	90.362	90.501	88.201	90.395
KJ425504 ck/CH/LHJL/091205 China	90.994	86.863	86.67	86.841	86.936	86.741	86.846	86.815	86.881	86.876	87.001	86.981	86.931	86.856	86.946	87.152	87.127	87.082	86.973	87.117	87.001	86.971	86.69	86.881	86.941	86.991	87.102	86.966	87.358	87.79	86.996	87.097	86.881	86.931	88.345	88.343	88.343	88.328	88.621	89.395	89.772	89.346	90.335	90.024	89.792	89.847	89.37	87.97	89.41
MH539771 IBV/SES/15AB-01 Canada	90.999	86.878	86.68	86.856	86.951	86.766	86.871	86.835	86.896	86.901	87.026	87.006	86.956	86.871	86.971	87.177	87.152	87.107	86.998	87.142	87.026	86.996	86.715	86.906	86.956	87.006	87.107	86.991	87.373	87.82	87.011	87.112	86.896	86.946	88.381	88.378	88.378	88.363	88.646	89.425	89.802	89.366	90.345	90.034	89.802	89.862	89.395	87.985	89.445
MH539772 IBV/SES/15SK-02 Canada	90.974	86.868	86.665	86.841	86.936	86.741	86.856	86.81	86.871	86.876	87.001	86.981	86.931	86.846	86.946	87.152	87.127	87.082	86.973	87.117	87.011	86.971	86.69	86.881	86.931	86.981	87.087	86.966	87.353	87.805	86.996	87.077	86.871	86.921	88.365	88.363	88.363	88.348	88.626	89.4	89.782	89.356	90.32	90.014	89.787	89.842	89.37	87.96	89.44
MK937830 M41/19 China	90.969	86.843	86.64	86.815	86.911	86.726	86.83	86.795	86.856	86.861	86.986	86.966	86.916	86.83	86.931	87.137	87.112	87.067	86.958	87.102	86.986	86.956	86.675	86.866	86.916	86.966	87.072	86.951	87.338	87.78	86.971	87.072	86.856	86.906	88.34	88.338	88.338	88.323	88.611	89.39	89.767	89.336	90.305	89.999	89.767	89.832	89.355	87.945	89.415
MW446887 IBV/M41/Y192 China	90.984	86.858	86.655	86.83	86.926	86.741	86.846	86.81	86.871	86.876	87.001	86.981	86.931	86.846	86.946	87.152	87.127	87.082	86.973	87.117	87.001	86.971	86.69	86.881	86.931	86.981	87.087	86.966	87.353	87.795	86.986	87.087	86.871	86.921	88.355	88.353	88.353	88.338	88.626	89.405	89.782	89.351	90.32	90.014	89.782	89.847	89.37	87.96	89.43
MW429061 IBV/M41/Y28 China	90.969	86.838	86.655	86.82	86.906	86.721	86.825	86.79	86.851	86.856	86.981	86.961	86.911	86.825	86.926	87.132	87.107	87.062	86.953	87.097	86.981	86.951	86.67	86.861	86.911	86.961	87.067	86.946	87.338	87.775	86.966	87.067	86.851	86.901	88.335	88.333	88.333	88.318	88.606	89.395	89.772	89.331	90.3	89.994	89.762	89.827	89.35	87.94	89.42
MW446888 IBV/M41/Y27 China	90.984	86.853	86.655	86.825	86.921	86.736	86.841	86.81	86.866	86.871	86.996	86.976	86.926	86.841	86.941	87.147	87.122	87.077	86.968	87.112	86.996	86.971	86.69	86.876	86.916	86.971	87.082	86.966	87.348	87.775	86.971	87.072	86.856	86.906	88.35	88.348	88.348	88.333	88.616	89.375	89.762	89.341	90.315	90.009	89.772	89.847	89.35	87.94	89.41
MW429062 IBV/M41/N56 China	90.979	86.853	86.65	86.825	86.921	86.736	86.841	86.805	86.866	86.871	86.996	86.976	86.926	86.841	86.941	87.147	87.122	87.077	86.968	87.112	86.996	86.966	86.685	86.876	86.926	86.976	87.082	86.961	87.348	87.79	86.981	87.082	86.866	86.916	88.355	88.353	88.353	88.338	88.621	89.39	89.777	89.346	90.315	90.009	89.777	89.842	89.365	87.955	89.425
MK728875 M41-CK/17 UK	90.989	86.883	86.67	86.846	86.941	86.756	86.861	86.835	86.886	86.881	87.016	86.996	86.946	86.861	86.961	87.157	87.132	87.087	86.978	87.122	87.016	86.976	86.695	86.886	86.936	86.986	87.102	86.981	87.368	87.81	87.001	87.102	86.886	86.936	88.381	88.378	88.378	88.363	88.651	89.42	89.807	89.366	90.345	90.039	89.797	89.862	89.385	87.985	89.455
KJ435286 ck/CH/LSD/1112150 China	90.954	86.783	86.584	86.745	86.841	86.665	86.775	86.735	86.78	86.77	86.916	86.886	86.835	86.74	86.871	87.072	87.042	87.011	86.893	87.036	86.916	86.886	86.604	86.805	86.856	86.916	86.996	86.881	87.278	87.73	86.921	87.011	86.8	86.846	88.285	88.283	88.283	88.268	88.55	89.345	89.706	89.321	90.279	89.974	89.742	89.777	89.324	87.889	89.33
KY047602 gCoV/Ck/Pol/G052/16 Poland	91.497	86.959	86.8	86.991	87.152	86.746	86.941	87.057	86.815	86.941	87.092	87.026	86.996	86.881	87.031	86.856	86.835	86.79	86.657	86.81	87.132	87.097	86.805	86.961	86.926	87.021	87.187	87.278	87.152	87.991	87.102	87.207	86.926	86.986	89.049	89.046	89.046	89.041	90.2	91.643	92.281	91.83	90.852	91.009	91.417	91.205	90.445	88.181	90.928
MK581207 gCoV/Ck/Pol/G103/16 Poland	91.492	86.949	86.77	86.976	87.132	86.711	86.916	87.031	86.79	86.916	87.052	86.996	86.971	86.856	87.001	86.841	86.82	86.775	86.642	86.795	87.092	87.072	86.78	86.926	86.896	86.981	87.182	87.253	87.107	87.961	87.092	87.167	86.886	86.946	89.029	89.026	89.026	89.021	90.169	91.638	92.256	91.805	90.842	90.984	91.406	91.185	90.405	88.156	90.888
MK581208 gCoV/Ck/Pol/G225/17 Poland	91.636	87.059	86.876	87.152	87.237	86.836	86.991	87.072	86.75	86.926	87.077	87.036	87.001	87.036	87.001	86.881	86.861	86.815	86.667	86.841	87.057	87.167	86.906	87.036	87.042	86.961	87.237	87.172	87.318	87.866	87.132	87.222	86.946	87.006	89.451	89.443	89.443	89.418	91.703	92.251	90.733	90.825	90.862	91.225	92.477	93.252	90.219	88.03	89.882
MK581202 gCoV/Ck/Pol/80/89 Poland	89.457	86.532	86.469	86.574	86.624	86.655	86.725	86.544	86.524	86.554	86.72	86.67	86.609	86.509	86.755	86.705	86.7	86.65	86.506	86.655	86.579	86.65	86.574	86.745	86.755	86.735	86.946	86.846	86.941	87.423	86.815	86.966	86.745	86.78	88.566	88.574	88.574	88.569	90.516	90.637	89.35	89.125	89.264	88.939	90.521	91.386	88.998	87.663	88.842
MK581203 gCoV/Ck/Pol/162/97 Poland	89.744	86.793	86.67	86.881	86.936	86.615	86.866	86.715	86.594	86.619	86.79	86.7	86.7	86.68	86.775	86.785	86.775	86.72	86.586	86.765	86.755	86.77	86.629	86.81	86.73	86.765	87.016	86.961	87.177	87.569	86.758	86.825	86.655	86.7	88.204	88.212	88.212	88.212	90.667	91.15	89.536	89.496	89.37	89.19	90.501	92.198	89.239	87.905	89.048
MK581204 gCoV/Ck/Pol/255/97 Poland	89.894	86.562	86.388	86.489	86.584	86.505	86.569	86.439	86.509	86.509	86.635	86.635	86.589	86.549	86.645	87.016	87.011	86.951	86.807	86.976	86.474	86.67	86.524	86.695	86.725	86.68	86.795	86.8	86.981	87.368	86.469	87.001	86.594	86.66	88.104	88.106	88.106	88.111	90.421	91.753	89.471	89.548	89.405	89.155	91.054	92.241	88.943	87.492	89.777
MT591566 CK/DE/IB80/16 Germany	91.441	87.16	87.147	87.323	87.539	86.876	87.217	87.268	87.021	87.006	87.137	87.082	87.031	87.001	87.323	86.956	86.936	86.881	86.752	86.916	87.549	87.323	86.931	86.991	87.142	87.413	87.398	87.76	86.504	88.142	87.016	87.73	87.152	87.202	89.562	89.569	89.569	89.549	89.983	90.718	93.381	94.796	91.772	96.241	93.433	90.016	90.841	88.276	90.852
MN987231 IBV/ck/EGY-Monuf/USC-3/13 Egypt	88.427	85.457	85.587	85.582	85.837	85.608	85.597	85.602	85.446	85.577	85.717	85.717	85.692	85.577	85.632	85.853	85.853	85.802	85.669	85.827	85.682	85.732	85.507	85.592	85.602	85.642	85.913	85.667	86.079	86.439	85.414	85.822	85.592	85.637	86.726	86.714	86.714	86.669	87.237	87.964	88.2	88.757	87.749	87.595	87.974	88.37	87.628	86.648	87.764
KR608272 LDT3-A/03 China	85.124	90.585	90.874	90.653	89.816	89.917	89.806	89.846	89.751	90.292	90.382	90.332	90.157	90.262	90.017	89.866	89.836	89.806	89.662	89.821	90.227	89.836	89.746	89.981	89.731	89.701	89.926	89.916	89.009	88.182	90.718	89.315	89.736	89.776	88.681	88.678	88.678	88.673	87.204	86.127	85.986	85.62	86.242	85.642	85.605	85.35	86.661	88.323	85.556
MK574042 ck/CH/LHB/110615/19 China	86.513	95.373	95.512	95.642	94.843	94.884	94.753	95.306	94.461	95.461	95.708	95.662	95.336	95.572	95.215	95.376	95.381	95.326	95.171	95.366	95.522	95.12	95.034	94.376	93.999	93.642	94.964	94.461	93.677	92.994	94.28	93.697	94.406	94.466	92.105	92.108	92.108	92.092	90.132	88.273	87.554	86.748	88.212	87.339	87.062	86.632	88.855	92.443	86.947
MK574043 ck/CH/LHB/110627/19 China	86.513	95.378	95.507	95.632	94.838	94.874	94.743	95.296	94.456	95.461	95.698	95.652	95.326	95.572	95.205	95.366	95.371	95.316	95.161	95.356	95.502	95.11	95.024	94.371	93.989	93.637	94.944	94.441	93.657	92.984	94.285	93.687	94.396	94.456	92.115	92.118	92.118	92.102	90.142	88.257	87.554	86.748	88.212	87.344	87.077	86.632	88.85	92.443	86.937
MN548286 D1466/84 UK	89.976	86.386	86.238	86.202	86.333	86.238	86.393	86.388	86.308	86.323	86.469	86.439	86.353	86.428	86.318	86.534	86.524	86.464	86.32	86.499	86.338	86.418	86.263	86.423	86.418	86.434	86.574	86.71	86.695	87.187	86.479	86.589	86.263	86.318	87.687	87.679	87.679	87.659	88.225	89.422	90.695	91.515	89.798	90.096	89.289	89.927	88.943	87.437	90.185
[truncated: 52 more columns]

## Sheet: Spike
Table S1c. Nucleotide identities between sequences in the QX dataset (n=101). Spike gene.
	KR822424 TCoV/080385d/08 France	OM525802 D532/9/CH/05	KX219797 ck/CH/LXJ/02I/16 China	KX252772 ck/CH/LSHH/03II/16 China	KX252778 ck/CH/LJL/05I/16 China	HQ848267 GX-YL5/05 China	KF411041 CK/CH/LGX/091109/13 China	KP118886 ck/CH/LSD/111235/14 China	KX185058 ck/CH/LGS/08I/16 China	KX219791 ck/CH/LHLJ/07I/16 China	KX219792 ck/CH/LGS/06I/16 China	KX375805 ck/CH/LJS/07V/16 China	KX252789 ck/CH/LHLJ/090605/16 China	KX252777 ck/CH/LSD/07I/16 China	KX364293 ck/CH/LJL/07III/16 China	KX219794 ck/CH/LJS/101109/16 China	KX236009 ck/CH/LSX/130132/16 China	KX259250 ck/CH/LJS/101113/16 China	KX302862 ck/CH/LJS/101111/16 China	KX364299 ck/CH/LSD/101223/16 China	KX236007 ck/CH/LSD/100408/16 China	KX219801 ck/CH/LSD/120437/16 China	MK032181 gCoV/ck/Chi/I0347/11 China	KX275391 ck/CH/LHLJ/140927/16 China	KX219800 ck/CH/LSD/130611/16 China	KX252787 ck/CH/LLN/131040/16/ China	KX252785 ck/CH/LSD/100311/16 China	KY407556 gCoV/ck/Chi/I0114/14 China	MK618759 K047-12/12 Korea	HM245924 CQ04-1/04 China	KX252779 ck/CH/LLN/06I/16 China	MK032177 gCoV/ck/Chi/I0724/17 China	MK032179 gCoV/ck/Chi/I0922/17 China	MK032180 gCoV/ck/China/I0737/17 China	OM525803 D535/4/FR/05	KY933089 1148-A/field/17 UK	MN548289 QX UK	KY933090 L1148/vaccine/17 UK	MK581205 gCoV/Ck/Pol/548/04 Poland	OM525806 D722/SK/06	OM525804 D591/2/GR/05	KX272465 AR251-15/14 Sudan	FN430414 ITA/90254/05 Italy	JQ088078 CK/SWE/065/8946/10 Sweden	KT886454 gCoV/Ck/Pol/74/09 Poland	MK581206 gCoV/Ck/Pol/195/12 Poland	OM525805 D683/HU/06	KX236001 ck/CH/LSD/03I/16 China	KP662631 ck/ZA/3665/11 South Africa
KR822424 TCoV/080385d/08 France	47.728	47.715	47.586	47.612	46.975	47.053	46.898	47.637	47.833	47.689	47.452	47.586	47.767	47.612	47.844	47.767	47.87	47.818	47.87	47.818	47.818	47.452	47.767	47.741	47.844	47.715	46.768	47.663	47.104	47.069	46.889	46.837	46.398	48.154	48.206	48.206	48.206	48.128	47.418	47.586	47.612	48.154	47.87	48.154	47.857	47.947	48.051	47.359	46.287
OM525802 D532/9/CH/05	47.728		97.184	95.326	96.326	86.811	88.519	86.331	96.555	96.844	96.984	96.961	96.955	96.812	97.613	95.755	95.669	95.698	95.726	95.783	95.154	96.069	96.356	95.24	96.412	95.84	96.441	87.539	93.982	86.189	95.469	84.863	84.806	82.09	96.441	96.469	96.441	96.241	96.412	93.882	95.326	94.154	96.126	95.64	95.983	95.354	95.64	96.212	92.81
KX219797 ck/CH/LXJ/02I/16 China	47.715	97.184		96.369	94.254	86.173	87.241	85.166	94.74	95.144	95.34	95.304	95.312	95.026	96.055	93.939	93.911	93.939	93.911	93.968	93.882	94.74	94.699	94.111	94.74	94.14	94.854	86.701	92.853	85.251	95.197	84.734	84.677	82.018	96.627	96.655	96.627	96.427	96.541	93.925	95.455	93.796	96.255	95.769	96.026	95.44	95.197	96.341	92.424
KX252772 ck/CH/LSHH/03II/16 China	47.586	95.326	96.369		94.94	86.059	87.553	85.649	94.654	94.973	94.911	94.814	95.512	95.054	95.483	94.74	94.654	94.683	94.711	94.768	94.425	94.483	94.555	94.025	94.826	94.54	94.654	86.928	93.213	85.394	94.454	84.677	84.677	82.104	96.77	96.741	96.712	96.512	96.712	94.154	95.655	93.882	96.398	95.969	96.083	95.612	95.283	96.541	92.481
KX252778 ck/CH/LJL/05I/16 China	47.612	96.326	94.254	94.94		86.655	88.69	86.843	95.569	95.601	95.655	95.592	96.255	95.655	96.569	97.227	97.141	97.17	97.198	97.256	96.827	95.397	95.218	96.083	95.455	96.541	95.312	88.065	93.053	86.473	93.997	85.049	84.991	82.647	95.712	95.74	95.769	95.569	95.655	93.439	94.94	93.768	95.483	94.94	95.026	94.383	95.169	95.512	92.31
HQ848267 GX-YL5/05 China	46.975	86.811	86.173	86.059	86.655		91.66	90.35	87.734	87.716	87.791	87.84	87.28	87.933	87.138	87.507	87.422	87.394	87.422	87.535	87.734	87.677	87.582	88.075	87.819	87.848	87.649	93.932	87.961	92.058	85.747	82.056	82.056	80.977	86.059	86.031	86.002	85.804	86.059	84.824	85.207	84.412	86.173	85.463	85.718	85.416	85.52	85.917	83.945
KF411041 CK/CH/LGX/091109/13 China	47.053	88.519	87.241	87.553	88.69	91.66		92.009	89.656	89.779	89.94	89.863	89.059	89.798	88.974	89.969	89.827	89.855	89.883	89.94	89.997	89.685	89.462	89.997	89.713	90.026	89.628	91.282	88.235	95.519	86.814	82.353	82.353	81.5	87.639	87.553	87.525	87.326	87.525	86.402	86.786	85.592	87.496	87.013	87.241	87.148	86.871	87.468	85.442
KP118886 ck/CH/LSD/111235/14 China	46.898	86.331	85.166	85.649	86.843	90.35	92.009		87.468	87.677	87.781	87.572	87.07	87.724	86.957	87.496	87.411	87.44	87.468	87.582	87.695	87.752	87.342	87.837	87.639	87.582	87.553	91.709	87.61	93.436	85.053	86.331	86.331	85.564	85.848	85.763	85.791	85.592	85.592	85.919	84.91	84.115	85.735	85.251	85.536	85.497	85.081	85.706	83.789
KX185058 ck/CH/LGS/08I/16 China	47.637	96.555	94.74	94.654	95.569	87.734	89.656	87.468		98.743	98.513	98.502	97.656	99.085	97.57	97.17	97.084	97.113	97.141	97.198	96.112	97.77	98.444	96.398	98.342	97.513	98.599	88.86	95.597	87.212	94.082	85.249	85.192	82.59	94.883	94.911	94.883	94.683	94.797	92.353	93.911	92.71	94.654	94.168	94.34	93.668	94.14	94.683	91.195
KX219791 ck/CH/LHLJ/07I/16 China	47.833	96.844	95.144	94.973	95.601	87.716	89.779	87.677	98.743		99.257	99.194	97.886	99.143	97.972	97.544	97.458	97.486	97.515	97.572	96.315	97.772	98.503	96.801	98.458	97.972	98.715	88.813	95.887	87.223	94.459	85.547	85.49	82.662	95.173	95.144	95.116	94.916	95.03	92.645	94.087	92.916	94.887	94.43	94.602	93.987	94.373	94.859	91.517
KX219792 ck/CH/LGS/06I/16 China	47.689	96.984	95.34	94.911	95.655	87.791	89.94	87.781	98.513	99.257		99.539	97.656	99.028	98.313	97.513	97.427	97.456	97.484	97.541	96.341	97.742	98.415	96.569	98.399	97.97	98.485	88.946	95.912	87.326	94.597	85.763	85.706	82.819	95.026	94.997	94.969	94.768	94.883	92.581	94.054	92.967	94.826	94.282	94.454	93.839	94.311	94.797	91.567
KX375805 ck/CH/LJS/07V/16 China	47.452	96.961	95.304	94.814	95.592	87.84	89.863	87.572	98.502	99.194	99.539		97.609	98.848	98.271	97.494	97.407	97.436	97.465	97.522	96.255	97.666	98.531	96.543	98.358	97.897	98.415	88.946	95.621	87.257	94.497	85.624	85.566	82.599	94.987	94.958	94.929	94.728	94.843	92.409	93.95	92.797	94.814	94.238	94.468	93.763	94.267	94.699	91.443
KX252789 ck/CH/LHLJ/090605/16 China	47.586	96.955	95.312	95.512	96.255	87.28	89.059	87.07	97.656	97.886	97.656	97.609		97.885	97.913	96.712	96.627	96.655	96.684	96.741	95.483	96.655	97.234	95.883	97.341	97.084	97.456	88.349	94.826	86.473	95.026	85.42	85.363	82.619	95.712	95.683	95.712	95.512	95.597	93.153	94.626	93.568	95.426	94.969	95.026	94.411	94.94	95.483	91.995
KX252777 ck/CH/LSD/07I/16 China	47.767	96.812	95.026	95.054	95.655	87.933	89.798	87.724	99.085	99.143	99.028	98.848	97.885		97.856	97.427	97.341	97.37	97.399	97.456	96.427	98.056	98.79	96.741	98.742	97.97	99.028	89.116	96.026	87.241	94.397	85.792	85.735	82.933	95.111	95.14	95.111	94.911	95.026	92.667	94.14	92.967	94.883	94.368	94.54	93.982	94.425	94.911	91.481
KX364293 ck/CH/LJL/07III/16 China	47.612	97.613	96.055	95.483	96.569	87.138	88.974	86.957	97.57	97.972	98.313	98.271	97.913	97.856		96.369	96.284	96.312	96.341	96.398	95.312	96.827	97.378	95.626	97.427	96.741	97.456	88.122	94.654	86.587	95.026	85.878	85.82	82.905	95.712	95.74	95.712	95.512	95.569	93.268	94.654	93.625	95.683	94.969	95.169	94.411	94.969	95.426	92.11
KX219794 ck/CH/LJS/101109/16 China	47.844	95.755	93.939	94.74	97.227	87.507	89.969	87.496	97.17	97.544	97.513	97.494	96.712	97.427	96.369		99.8	99.828	99.857	99.914	98.485	96.427	96.975	97.341	96.998	98.856	97.084	89.315	94.425	87.212	93.711	85.077	85.02	82.533	94.997	94.969	94.997	94.797	94.94	92.581	93.997	92.796	94.74	94.311	94.425	93.725	94.168	94.826	91.452
KX236009 ck/CH/LSX/130132/16 China	47.767	95.669	93.911	94.654	97.141	87.422	89.827	87.411	97.084	97.458	97.427	97.407	96.627	97.341	96.284	99.8		99.8	99.771	99.828	98.399	96.341	96.889	97.256	96.913	98.771	96.998	89.23	94.34	87.07	93.625	84.991	84.934	82.447	94.911	94.883	94.911	94.768	94.854	92.496	93.911	92.71	94.654	94.225	94.34	93.639	94.082	94.74	91.366
KX259250 ck/CH/LJS/101113/16 China	47.87	95.698	93.939	94.683	97.17	87.394	89.855	87.44	97.113	97.486	97.456	97.436	96.655	97.37	96.312	99.828	99.8		99.8	99.857	98.428	96.369	96.917	97.284	96.941	98.799	97.027	89.201	94.368	87.099	93.654	85.02	84.963	82.476	94.94	94.911	94.94	94.74	94.883	92.524	93.939	92.739	94.683	94.254	94.368	93.668	94.111	94.768	91.395
KX302862 ck/CH/LJS/101111/16 China	47.818	95.726	93.911	94.711	97.198	87.422	89.883	87.468	97.141	97.515	97.484	97.465	96.684	97.399	96.341	99.857	99.771	99.8		99.886	98.456	96.398	96.946	97.313	96.97	98.828	97.055	89.23	94.397	87.127	93.682	85.049	84.991	82.561	94.969	94.94	94.969	94.768	94.911	92.553	93.968	92.767	94.711	94.282	94.397	93.696	94.14	94.797	91.424
KX364299 ck/CH/LSD/101223/16 China	47.87	95.783	93.968	94.768	97.256	87.535	89.94	87.582	97.198	97.572	97.541	97.522	96.741	97.456	96.398	99.914	99.828	99.857	99.886		98.513	96.455	97.061	97.37	97.027	98.885	97.113	89.287	94.511	87.241	93.739	85.106	85.049	82.561	95.026	94.997	95.026	94.826	94.969	92.61	94.025	92.824	94.768	94.34	94.454	93.754	94.197	94.854	91.481
KX236007 ck/CH/LSD/100408/16 China	47.818	95.154	93.882	94.425	96.827	87.734	89.997	87.695	96.112	96.315	96.341	96.255	95.483	96.427	95.312	98.485	98.399	98.428	98.456	98.513		97.084	95.88	98.313	96.055	97.57	96.026	89.315	93.997	87.582	93.625	85.363	85.306	82.819	94.826	94.854	94.883	94.74	94.826	92.982	93.911	92.624	94.568	94.14	94.397	93.725	93.997	94.711	91.395
KX219801 ck/CH/LSD/120437/16 China	47.818	96.069	94.74	94.483	95.397	87.677	89.685	87.752	97.77	97.772	97.742	97.666	96.655	98.056	96.827	96.427	96.341	96.369	96.398	96.455	97.084		97.926	97.17	98.399	96.998	97.684	88.804	95.197	87.411	94.025	85.535	85.535	82.762	94.711	94.74	94.711	94.511	94.568	92.524	93.654	92.739	94.397	93.968	94.311	93.725	94.025	94.397	91.252
MK032181 gCoV/ck/Chi/I0347/11 China	47.452	96.356	94.699	94.555	95.218	87.582	89.462	87.342	98.444	98.503	98.415	98.531	97.234	98.79	97.378	96.975	96.889	96.917	96.946	97.061	95.88	97.926		96.111	98.617	97.551	98.588	88.66	95.477	86.999	93.835	85.364	85.307	82.426	94.555	94.584	94.555	94.353	94.468	92.092	93.518	92.509	94.353	93.806	94.036	93.388	93.95	94.296	91.011
KX275391 ck/CH/LHLJ/140927/16 China	47.767	95.24	94.111	94.025	96.083	88.075	89.997	87.837	96.398	96.801	96.569	96.543	95.883	96.741	95.626	97.341	97.256	97.284	97.313	97.37	98.313	97.17	96.111		96.312	97.627	96.398	89.372	94.254	87.695	93.796	85.735	85.678	82.847	94.74	94.768	94.74	94.54	94.626	92.61	93.711	92.596	94.454	93.997	94.254	93.582	93.882	94.397	91.252
KX219800 ck/CH/LSD/130611/16 China	47.741	96.412	94.74	94.826	95.455	87.819	89.713	87.639	98.342	98.458	98.399	98.358	97.341	98.742	97.427	96.998	96.913	96.941	96.97	97.027	96.055	98.399	98.617	96.312		97.827	98.37	89.088	95.912	87.269	94.054	85.62	85.62	82.79	94.854	94.883	94.854	94.654	94.711	92.439	93.796	92.767	94.626	94.111	94.282	93.782	94.111	94.54	91.281
KX252787 ck/CH/LLN/131040/16/ China	47.844	95.84	94.14	94.54	96.541	87.848	90.026	87.582	97.513	97.972	97.97	97.897	97.084	97.97	96.741	98.856	98.771	98.799	98.828	98.885	97.57	96.998	97.551	97.627	97.827		97.456	89.656	94.854	87.269	93.854	85.535	85.535	82.647	94.768	94.74	94.711	94.511	94.654	92.324	93.796	92.71	94.483	94.025	94.197	93.696	94.025	94.425	91.309
KX252785 ck/CH/LSD/100311/16 China	47.715	96.441	94.854	94.654	95.312	87.649	89.628	87.553	98.599	98.715	98.485	98.415	97.456	99.028	97.456	97.084	96.998	97.027	97.055	97.113	96.026	97.684	98.588	96.398	98.37	97.456		88.832	95.512	87.099	94.054	85.592	85.535	82.847	94.768	94.854	94.826	94.626	94.683	92.524	93.854	92.739	94.54	94.025	94.197	93.696	94.14	94.511	91.195
KY407556 gCoV/ck/Chi/I0114/14 China	46.768	87.539	86.701	86.928	88.065	93.932	91.282	91.709	88.86	88.813	88.946	88.946	88.349	89.116	88.122	89.315	89.23	89.201	89.23	89.287	89.315	88.804	88.66	89.372	89.088	89.656	88.832		88.349	92.279	85.962	82.808	82.808	81.643	87.155	87.155	87.127	86.928	87.07	85.408	86.218	85.109	87.241	86.53	86.729	86.342	86.417	87.07	84.729
MK618759 K047-12/12 Korea	47.663	93.982	92.853	93.213	93.053	87.961	88.235	87.61	95.597	95.887	95.912	95.621	94.826	96.026	94.654	94.425	94.34	94.368	94.397	94.511	93.997	95.197	95.477	94.254	95.912	94.854	95.512	88.349		88.065	91.852	85.62	85.62	82.933	93.025	92.996	92.996	92.796	92.853	91.209	91.91	91.138	92.939	92.453	92.653	92.196	92.31	92.767	89.651
HM245924 CQ04-1/04 China	47.104	86.189	85.251	85.394	86.473	92.058	95.519	93.436	87.212	87.223	87.326	87.257	86.473	87.241	86.587	87.212	87.07	87.099	87.127	87.241	87.582	87.411	86.999	87.695	87.269	87.269	87.099	92.279	88.065		84.598	82.58	82.58	81.756	85.394	85.365	85.337	85.138	85.28	84.356	84.456	83.575	85.394	84.939	85.109	84.87	84.712	85.223	83.333
KX252779 ck/CH/LLN/06I/16 China	47.069	95.469	95.197	94.454	93.997	85.747	86.814	85.053	94.082	94.459	94.597	94.497	95.026	94.397	95.026	93.711	93.625	93.654	93.682	93.739	93.625	94.025	93.835	93.796	94.054	93.854	94.054	85.962	91.852	84.598		84.763	84.706	82.104	95.283	95.312	95.283	95.083	95.226	93.954	94.969	93.682	95.054	94.568	94.626	94.154	94.654	95.026	91.852
MK032177 gCoV/ck/Chi/I0724/17 China	46.889	84.863	84.734	84.677	85.049	82.056	82.353	86.331	85.249	85.547	85.763	85.624	85.42	85.792	85.878	85.077	84.991	85.02	85.049	85.106	85.363	85.535	85.364	85.735	85.62	85.535	85.592	82.808	85.62	82.58	84.763		99.943	96.884	85.02	85.106	85.077	84.877	84.877	87.521	85.792	84.877	85.077	84.563	85.106	84.377	84.877	84.82	83.791
MK032179 gCoV/ck/Chi/I0922/17 China	46.837	84.806	84.677	84.677	84.991	82.056	82.353	86.331	85.192	85.49	85.706	85.566	85.363	85.735	85.82	85.02	84.934	84.963	84.991	85.049	85.306	85.535	85.307	85.678	85.62	85.535	85.535	82.808	85.62	82.58	84.706	99.943		96.884	84.963	85.049	85.02	84.82	84.877	87.521	85.735	84.82	85.02	84.505	85.049	84.377	84.82	84.763	83.734
MK032180 gCoV/ck/China/I0737/17 China	46.398	82.09	82.018	82.104	82.647	80.977	81.5	85.564	82.59	82.662	82.819	82.599	82.619	82.933	82.905	82.533	82.447	82.476	82.561	82.561	82.819	82.762	82.426	82.847	82.79	82.647	82.847	81.643	82.933	81.756	82.104	96.884	96.884		82.533	82.561	82.533	82.333	82.39	85.063	83.333	82.304	82.561	82.018	82.504	81.904	82.304	82.361	82.075
OM525803 D535/4/FR/05	48.154	96.441	96.627	96.77	95.712	86.059	87.639	85.848	94.883	95.173	95.026	94.987	95.712	95.111	95.712	94.997	94.911	94.94	94.969	95.026	94.826	94.711	94.555	94.74	94.854	94.768	94.768	87.155	93.025	85.394	95.283	85.02	84.963	82.533		99.8	99.771	99.571	99.6	96.641	98.228	96.226	99.4	98.971	98.971	98.013	97.827	99.257	94.826
KY933089 1148-A/field/17 UK	48.206	96.469	96.655	96.741	95.74	86.031	87.553	85.763	94.911	95.144	94.997	94.958	95.683	95.14	95.74	94.969	94.883	94.911	94.94	94.997	94.854	94.74	94.584	94.768	94.883	94.74	94.854	87.155	92.996	85.365	95.312	85.106	85.049	82.561	99.8		99.971	99.771	99.628	96.67	98.256	96.198	99.428	99.057	99.057	98.099	97.97	99.285	94.768
MN548289 QX UK	48.206	96.441	96.627	96.712	95.769	86.002	87.525	85.791	94.883	95.116	94.969	94.929	95.712	95.111	95.712	94.997	94.911	94.94	94.969	95.026	94.883	94.711	94.555	94.74	94.854	94.711	94.826	87.127	92.996	85.337	95.283	85.077	85.02	82.533	99.771	99.971		99.8	99.6	96.641	98.228	96.169	99.4	99.028	99.028	98.07	97.942	99.314	94.74
KY933090 L1148/vaccine/17 UK	48.206	96.241	96.427	96.512	95.569	85.804	87.326	85.592	94.683	94.916	94.768	94.728	95.512	94.911	95.512	94.797	94.768	94.74	94.768	94.826	94.74	94.511	94.353	94.54	94.654	94.511	94.626	86.928	92.796	85.138	95.083	84.877	84.82	82.333	99.571	99.771	99.8		99.4	96.498	98.027	95.969	99.2	98.828	98.828	97.87	97.742	99.114	94.54
MK581205 gCoV/Ck/Pol/548/04 Poland	48.128	96.412	96.541	96.712	95.655	86.059	87.525	85.592	94.797	95.03	94.883	94.843	95.597	95.026	95.569	94.94	94.854	94.883	94.911	94.969	94.826	94.568	94.468	94.626	94.711	94.654	94.683	87.07	92.853	85.28	95.226	84.877	84.877	82.39	99.6	99.628	99.6	99.4		96.727	98.228	96.055	99.228	98.742	98.742	97.956	97.827	99.285	94.626
OM525806 D722/SK/06	47.418	93.882	93.925	94.154	93.439	84.824	86.402	85.919	92.353	92.645	92.581	92.409	93.153	92.667	93.268	92.581	92.496	92.524	92.553	92.61	92.982	92.524	92.092	92.61	92.439	92.324	92.524	85.408	91.209	84.356	93.954	87.521	87.521	85.063	96.641	96.67	96.641	96.498	96.727		97.241	94.983	96.441	95.783	96.355	95.54	95.955	96.355	93.925
OM525804 D591/2/GR/05	47.586	95.326	95.455	95.655	94.94	85.207	86.786	84.91	93.911	94.087	94.054	93.95	94.626	94.14	94.654	93.997	93.911	93.939	93.968	94.025	93.911	93.654	93.518	93.711	93.796	93.796	93.854	86.218	91.91	84.456	94.969	85.792	85.735	83.333	98.228	98.256	98.228	98.027	98.228	97.241		95.855	97.97	97.37	97.427	96.898	97.599	97.97	94.94
KX272465 AR251-15/14 Sudan	47.612	94.154	93.796	93.882	93.768	84.412	85.592	84.115	92.71	92.916	92.967	92.797	93.568	92.967	93.625	92.796	92.71	92.739	92.767	92.824	92.624	92.739	92.509	92.596	92.767	92.71	92.739	85.109	91.138	83.575	93.682	84.877	84.82	82.304	96.226	96.198	96.169	95.969	96.055	94.983	95.855		95.969	95.597	96.055	95.097	96.255	95.769	95.54
FN430414 ITA/90254/05 Italy	48.154	96.126	96.255	96.398	95.483	86.173	87.496	85.735	94.654	94.887	94.826	94.814	95.426	94.883	95.683	94.74	94.654	94.683	94.711	94.768	94.568	94.397	94.353	94.454	94.626	94.483	94.54	87.241	92.939	85.394	95.054	85.077	85.02	82.561	99.4	99.428	99.4	99.2	99.228	96.441	97.97	95.969		98.656	98.628	97.756	97.627	98.885	94.597
JQ088078 CK/SWE/065/8946/10 Sweden	47.87	95.64	95.769	95.969	94.94	85.463	87.013	85.251	94.168	94.43	94.282	94.238	94.969	94.368	94.969	94.311	94.225	94.254	94.282	94.34	94.14	93.968	93.806	93.997	94.111	94.025	94.025	86.53	92.453	84.939	94.568	84.563	84.505	82.018	98.971	99.057	99.028	98.828	98.742	95.783	97.37	95.597	98.656		98.428	97.327	97.17	98.513	94.054
KT886454 gCoV/Ck/Pol/74/09 Poland	48.154	95.983	96.026	96.083	95.026	85.718	87.241	85.536	94.34	94.602	94.454	94.468	95.026	94.54	95.169	94.425	94.34	94.368	94.397	94.454	94.397	94.311	94.036	94.254	94.282	94.197	94.197	86.729	92.653	85.109	94.626	85.106	85.049	82.504	98.971	99.057	99.028	98.828	98.742	96.355	97.427	96.055	98.628	98.428		97.813	97.37	98.542	94.654
MK581206 gCoV/Ck/Pol/195/12 Poland	47.857	95.354	95.44	95.612	94.383	85.416	87.148	85.497	93.668	93.987	93.839	93.763	94.411	93.982	94.411	93.725	93.639	93.668	93.696	93.754	93.725	93.725	93.388	93.582	93.782	93.696	93.696	86.342	92.196	84.87	94.154	84.377	84.377	81.904	98.013	98.099	98.07	97.87	97.956	95.54	96.898	95.097	97.756	97.327	97.813		96.641	97.756	93.754
OM525805 D683/HU/06	47.947	95.64	95.197	95.283	95.169	85.52	86.871	85.081	94.14	94.373	94.311	94.267	94.94	94.425	94.969	94.168	94.082	94.111	94.14	94.197	93.997	94.025	93.95	93.882	94.111	94.025	94.14	86.417	92.31	84.712	94.654	84.877	84.82	82.304	97.827	97.97	97.942	97.742	97.827	95.955	97.599	96.255	97.627	97.17	97.37	96.641		97.57	94.768
KX236001 ck/CH/LSD/03I/16 China	48.051	96.212	96.341	96.541	95.512	85.917	87.468	85.706	94.683	94.859	94.797	94.699	95.483	94.911	95.426	94.826	94.74	94.768	94.797	94.854	94.711	94.397	94.296	94.397	94.54	94.425	94.511	87.07	92.767	85.223	95.026	84.82	84.763	82.361	99.257	99.285	99.314	99.114	99.285	96.355	97.97	95.769	98.885	98.513	98.542	97.756	97.57		94.425
KP662631 ck/ZA/3665/11 South Africa	47.359	92.81	92.424	92.481	92.31	83.945	85.442	83.789	91.195	91.517	91.567	91.443	91.995	91.481	92.11	91.452	91.366	91.395	91.424	91.481	91.395	91.252	91.011	91.252	91.281	91.309	91.195	84.729	89.651	83.333	91.852	83.791	83.734	82.075	94.826	94.768	94.74	94.54	94.626	93.925	94.94	95.54	94.597	94.054	94.654	93.754	94.768	94.425
KF377577 4/91 vaccine China	46.287	81.221	81.136	81.307	81.792	80.187	81.078	85.191	81.707	81.722	81.821	81.622	81.735	82.021	81.963	81.764	81.678	81.707	81.735	81.792	82.049	81.878	81.507	81.906	81.878	81.735	81.963	80.851	81.992	81.362	81.25	95.947	95.947	98.659	81.764	81.792	81.764	81.564	81.621	84.318	82.62	81.478	81.792	81.25	81.735	81.377	81.564	81.621	81.447
KP118881 ck/CH/LBJ/140413/14 China	46.287	81.193	81.107	81.279	81.764	80.159	81.05	85.163	81.678	81.694	81.792	81.593	81.707	81.992	81.935	81.735	81.65	81.678	81.707	81.764	82.021	81.849	81.478	81.878	81.849	81.707	81.963	80.823	81.935	81.39	81.221	95.89	95.89	98.545	81.735	81.764	81.735	81.535	81.592	84.289	82.591	81.45	81.764	81.193	81.707	81.334	81.535	81.592	81.418
KP118880 ck/CH/LHB/130927/14 China	46.287	81.25	81.164	81.336	81.821	80.215	81.106	85.22	81.735	81.751	81.849	81.651	81.764	82.049	81.992	81.792	81.707	81.735	81.764	81.821	82.078	81.906	81.536	81.935	81.906	81.764	81.992	80.879	82.021	81.39	81.279	95.976	95.976	98.687	81.792	81.821	81.792	81.592	81.65	84.346	82.648	81.507	81.821	81.279	81.764	81.405	81.592	81.65	81.475
KP118888 ck/CH/LLN/130102/15 China	46.338	81.164	81.079	81.307	81.849	80.187	81.106	85.163	81.707	81.722	81.764	81.565	81.735	82.049	81.906	81.821	81.735	81.764	81.792	81.849	82.106	81.878	81.507	81.963	81.878	81.792	81.963	80.908	81.992	81.39	81.193	95.89	95.89	98.545	81.764	81.792	81.764	81.564	81.621	84.318	82.62	81.478	81.792	81.25	81.735	81.377	81.564	81.592	81.418
MZ367369 IBV/Ck/Bel/4134_001/19 Belgium	46.325	81.236	81.15	81.378	81.864	80.201	81.149	85.262	81.778	81.794	81.835	81.636	81.807	82.092	81.978	81.835	81.749	81.778	81.807	81.864	82.12	81.949	81.579	81.978	81.949	81.807	82.035	80.95	82.092	81.433	81.264	95.905	95.905	98.616	81.835	81.864	81.835	81.635	81.692	84.389	82.691	81.55	81.864	81.321	81.807	81.448	81.635	81.664	81.489
KP118884 ck/CH/LSD/110651/15 China	46.287	81.307	81.221	81.393	81.878	80.244	81.135	85.277	81.792	81.808	81.906	81.708	81.821	82.106	82.049	81.849	81.764	81.792	81.821	81.878	82.135	81.963	81.593	81.992	81.963	81.821	82.049	80.965	82.049	81.418	81.336	95.947	95.947	98.659	81.849	81.878	81.849	81.65	81.707	84.404	82.705	81.564	81.878	81.336	81.821	81.462	81.65	81.707	81.504
KP118882 ck/CH/LBJ/140402/14 China	46.235	81.193	81.107	81.279	81.764	80.13	81.05	85.135	81.678	81.694	81.792	81.593	81.707	81.992	81.935	81.735	81.65	81.678	81.764	81.764	82.021	81.849	81.478	81.878	81.849	81.707	81.935	80.794	81.963	81.305	81.279	95.833	95.833	98.659	81.735	81.764	81.735	81.535	81.592	84.289	82.591	81.507	81.764	81.221	81.707	81.348	81.592	81.592	81.418
KP118892 ck/CH/LLN/120101 China	46.287	81.193	81.107	81.279	81.764	80.215	81.05	85.22	81.678	81.694	81.792	81.593	81.764	81.992	81.935	81.735	81.65	81.678	81.707	81.764	82.021	81.849	81.478	81.878	81.849	81.707	81.935	80.879	81.963	81.39	81.221	95.862	95.862	98.63	81.735	81.764	81.735	81.535	81.592	84.289	82.591	81.45	81.764	81.221	81.707	81.348	81.535	81.592	81.418
KP118891 ck/CH/LHLJ/111246/14 China	46.287	81.279	81.193	81.364	81.849	80.187	81.106	85.22	81.764	81.779	81.878	81.68	81.792	82.078	82.021	81.821	81.735	81.764	81.792	81.849	82.106	81.935	81.565	81.963	81.935	81.792	82.021	80.908	82.049	81.39	81.307	96.005	96.005	98.659	81.821	81.849	81.821	81.621	81.678	84.375	82.677	81.535	81.849	81.307	81.792	81.434	81.621	81.678	81.475
KP118893 ck/CH/LSD/110410/14 China	46.313	81.221	81.136	81.307	81.792	80.13	81.05	85.22	81.707	81.722	81.821	81.622	81.792	82.021	81.963	81.764	81.678	81.707	81.735	81.792	82.049	81.878	81.507	81.906	81.878	81.735	81.963	80.908	82.049	81.418	81.25	95.89	95.89	98.545	81.764	81.792	81.764	81.564	81.621	84.318	82.62	81.478	81.792	81.25	81.735	81.377	81.564	81.592	81.389
KP036503 ck/CH/LHB/121010 China	46.313	81.221	81.136	81.307	81.792	80.187	81.106	85.277	81.707	81.722	81.821	81.622	81.792	82.021	81.963	81.764	81.678	81.707	81.735	81.792	82.049	81.878	81.507	81.906	81.878	81.735	81.963	80.965	82.049	81.447	81.25	95.89	95.89	98.602	81.764	81.792	81.764	81.564	81.621	84.318	82.62	81.478	81.792	81.25	81.735	81.377	81.564	81.621	81.418
KP036504 ck/CH/LHB/130630 China	46.338	81.193	81.107	81.279	81.764	80.102	81.078	85.191	81.678	81.694	81.792	81.593	81.707	81.992	81.935	81.735	81.65	81.678	81.707	81.764	82.021	81.849	81.478	81.878	81.849	81.707	81.935	80.908	82.021	81.362	81.221	95.919	95.919	98.573	81.735	81.764	81.735	81.535	81.592	84.289	82.591	81.45	81.764	81.221	81.707	81.348	81.535	81.592	81.389
KP118883 ck/CH/LHB/121041 China	46.287	81.279	81.193	81.364	81.849	80.187	81.106	85.22	81.764	81.779	81.878	81.68	81.792	82.078	82.021	81.821	81.735	81.764	81.792	81.849	82.106	81.935	81.565	81.963	81.935	81.792	82.021	80.908	82.049	81.39	81.307	96.005	96.005	98.659	81.821	81.849	81.821	81.621	81.678	84.375	82.677	81.535	81.849	81.307	81.792	81.434	81.621	81.678	81.475
KP118887 ck/CH/LHB/140532/14 China	46.235	81.136	81.05	81.279	81.764	80.102	81.021	85.163	81.678	81.694	81.735	81.536	81.707	81.992	81.878	81.735	81.65	81.678	81.707	81.764	82.021	81.849	81.478	81.878	81.849	81.707	81.935	80.851	81.963	81.333	81.164	95.833	95.833	98.487	81.735	81.764	81.735	81.535	81.592	84.289	82.591	81.45	81.764	81.193	81.707	81.348	81.535	81.564	81.418
KP118885 ck/CH/LSD/110857/14 China	46.313	81.279	81.193	81.364	81.849	80.187	81.078	85.191	81.764	81.779	81.878	81.68	81.792	82.078	82.021	81.821	81.735	81.764	81.792	81.849	82.106	81.935	81.565	81.963	81.935	81.792	82.021	80.908	81.963	81.362	81.307	95.947	95.947	98.602	81.821	81.849	81.821	81.621	81.678	84.375	82.677	81.535	81.849	81.307	81.792	81.42	81.621	81.678	81.504
KP036502 ck/CH/LHLJ/140906 China	46.501	81.818	81.647	81.761	82.133	80.579	81.245	85.024	82.047	82.291	82.361	82.138	82.161	82.476	82.447	82.161	82.075	82.104	82.133	82.19	82.447	82.333	81.965	82.504	82.333	82.161	82.447	81.358	82.504	81.415	81.675	95.712	95.712	95.283	82.276	82.333	82.304	82.104	82.104	84.806	83.105	82.161	82.419	81.818	82.333	81.931	82.218	82.104	82.159
KJ135013 IBVUkr27/11 Ukraine	46.57	81.707	81.507	81.592	81.963	80.811	81.39	85.39	81.906	82.036	82.163	81.881	82.049	82.334	82.22	81.963	81.878	81.906	81.935	81.992	82.306	82.249	81.737	82.306	82.192	82.078	82.249	81.447	82.192	81.589	81.65	95.947	95.947	96.661	82.163	82.22	82.192	81.992	81.992	84.746	82.991	81.992	82.22	81.678	82.163	81.819	81.992	82.021	81.933
KJ425496 ck/CH/LHB/130573 China	47.199	85.849	85.077	84.963	85.82	87.677	87.241	87.269	86.392	86.432	86.564	86.373	85.792	86.564	85.963	86.449	86.364	86.335	86.364	86.478	87.736	87.45	86.142	87.536	86.564	86.421	86.449	88.15	87.479	89.656	84.534	82.361	82.361	81.904	85.363	85.42	85.392	85.249	85.249	84.663	84.391	83.619	85.563	84.963	85.106	84.678	84.563	85.134	83.247
KP343691 ck/CH/LGX/130530 China	47.328	89.151	88.393	88.736	89.594	90.63	90.935	89.372	89.994	90.06	90.08	89.974	89.423	90.252	89.565	90.166	90.137	90.109	90.08	90.194	91.452	90.966	89.83	91.224	90.166	90.194	89.88	90.537	90.995	93.464	87.793	85.306	85.306	82.905	88.736	88.765	88.736	88.593	88.651	87.922	87.793	86.764	88.708	88.222	88.451	87.664	88.05	88.536	85.42
KT736032 ck/CHLDL150434-II/16 China	47.25	89.008	88.25	88.593	89.451	90.488	90.793	89.23	89.851	89.917	89.937	89.83	89.337	90.109	89.423	90.023	89.994	89.966	89.937	90.051	91.309	90.823	89.686	91.081	90.023	90.051	89.737	90.395	90.852	93.322	87.65	85.163	85.163	82.762	88.593	88.622	88.593	88.451	88.508	87.779	87.65	86.621	88.565	88.079	88.308	87.55	87.965	88.393	85.277
KU356856 ck/CH/SCYB/140913/25 China	47.018	87.007	86.392	86.85	87.507	88.501	88.662	87.155	88.022	88.089	88.107	88.044	87.45	88.279	87.593	88.193	88.165	88.136	88.107	88.222	88.822	88.593	87.929	88.651	88.308	88.25	88.022	88.633	89.194	91.191	86.478	87.822	87.822	85.449	86.993	86.964	86.935	86.735	86.85	87.664	87.736	85.992	86.964	86.364	86.678	85.949	86.85	86.735	85.163
MT505388 CK/CH/SCMY/160315/20 China	47.483	87.75	87.193	87.593	88.193	89.239	89.628	87.98	88.593	88.66	88.679	88.62	88.022	88.851	88.165	88.765	88.679	88.651	88.679	88.794	89.708	89.423	88.505	89.594	88.851	88.794	88.479	89.372	89.88	92.1	86.564	86.878	86.878	84.477	87.764	87.793	87.764	87.564	87.679	86.893	86.821	85.935	87.736	87.193	87.507	86.721	87.078	87.564	84.591
KJ425497 ck/CH/LHB/130598/14 China	46.889	81.475	81.161	81.332	81.389	82.624	82.268	81.103	81.79	81.834	81.904	81.821	81.675	81.99	81.818	81.875	81.79	81.761	81.79	81.904	82.075	81.99	81.619	82.104	82.018	81.79	81.875	82.467	82.762	82.921	80.932	83.819	83.819	83.333	81.847	81.904	81.875	81.675	81.732	81.947	81.475	81.218	82.133	81.532	81.904	81.502	81.618	81.618	80.871
FN430415 NGA/A116E7/06 Nigeria	45.736	80.867	80.42	80.478	80.766	79.754	80.195	80.738	80.91	81.041	81.14	81.14	80.766	81.227	81.111	80.996	80.91	80.939	80.967	81.025	80.996	80.91	81.083	80.881	81.169	80.91	81.255	80.195	81.428	80.624	80.248	86.237	86.294	86.035	80.967	81.025	80.996	80.795	80.852	81.615	81.399	81.083	81.054	80.651	80.967	80.504	81.198	81.025	81.083
KR231009 B1648/84 Belgium	47.353	81.109	80.753	80.667	81.038	79.637	80.385	81.746	81.18	81.282	81.409	81.207	81.18	81.466	81.352	81.323	81.238	81.266	81.323	81.409	81.523	81.494	81.063	81.466	81.38	81.352	81.295	80.244	81.637	80.697	81.123	85.6	85.6	85.572	81.437	81.494	81.494	81.295	81.295	82.022	81.694	81.694	81.523	81.123	81.466	80.922	81.409	81.466	81.209
MN548285 CR88 (4/91)/88 France	45.502	80.996	80.823	80.708	81.313	79.497	80.509	84.316	81.083	81.099	81.284	81.255	81.054	81.342	81.371	81.227	81.14	81.169	81.198	81.255	81.255	81.198	81.054	80.996	81.284	81.227	81.227	80.109	81.313	80.853	81.083	92.197	92.197	94.616	81.025	80.996	80.967	80.766	80.823	82.566	81.428	81.255	81.054	80.449	80.651	80.36	81.083	80.881	80.852
MN548288 Italy02/02 Italy	46.656	81.193	80.965	80.793	81.107	79.96	80.766	82.752	81.605	81.352	81.564	81.392	81.307	81.707	81.478	81.478	81.393	81.421	81.45	81.507	81.65	81.45	81.219	81.507	81.621	81.564	81.393	80.567	81.735	80.823	80.365	87.3	87.272	87.757	81.592	81.678	81.678	81.478	81.564	81.921	81.279	81.421	81.764	81.307	81.592	81.148	81.992	81.507	80.337
MG021194 gCoV/Ck/IT/624I/96 Italy	45.933	79.809	79.424	79.509	79.566	79.365	79.631	80.369	80.108	79.954	80.166	80.04	79.966	80.28	80.108	79.937	79.795	79.823	79.852	79.909	80.108	80.166	79.81	80.08	80.108	80.051	79.966	80.028	80.08	80.113	80.023	84.161	84.161	84.446	79.994	79.994	79.966	79.766	79.909	80.294	80.137	80.251	80.166	79.652	80.051	79.477	80.108	80.08	79.195
KU900739 QIA-03342/03 Korea	48.206	96.555	96.684	96.827	95.769	86.229	87.667	85.791	94.94	95.173	95.026	94.987	95.74	95.169	95.712	95.083	94.997	95.026	95.054	95.111	94.997	94.74	94.613	94.797	94.854	94.797	94.826	87.241	92.996	85.45	95.369	85.077	85.02	82.533	99.571	99.6	99.571	99.371	99.686	96.727	98.256	96.141	99.2	98.714	98.828	98.07	97.913	99.371	94.597
KU900744 QIA-Q43/06 Korea	47.405	91.552	91.624	91.166	90.966	88.463	86.957	87.269	91.595	91.888	91.852	91.703	91.195	91.824	91.395	91.824	91.738	91.767	91.795	91.91	91.995	91.624	91.443	91.767	91.767	91.567	91.681	88.538	93.282	89.258	90.194	84.848	84.791	82.304	92.138	92.167	92.138	91.938	92.11	90.923	91.052	89.823	91.995	91.624	91.652	90.921	91.081	91.91	88.279
KJ425504 ck/CH/LHJL/091205 China	46.94	81.475	81.332	81.675	81.532	82.879	82.552	81.586	81.732	81.891	81.99	81.907	81.818	81.933	81.904	81.875	81.79	81.761	81.79	81.904	82.19	82.047	81.648	82.218	81.961	81.847	81.818	82.58	82.704	83.291	81.161	83.934	83.934	83.562	82.104	82.104	82.075	81.875	82.018	82.061	81.618	81.475	82.333	81.761	82.19	81.588	81.847	81.818	81.042
MH539771 IBV/SES/15AB-01 Canada	46.94	81.504	81.361	81.704	81.532	82.851	82.552	81.643	81.761	81.919	82.018	81.936	81.847	81.961	81.933	81.875	81.79	81.761	81.79	81.904	82.19	82.075	81.677	82.218	81.99	81.847	81.847	82.609	82.733	83.262	81.189	83.934	83.934	83.562	82.133	82.133	82.104	81.904	81.99	82.09	81.647	81.504	82.361	81.79	82.218	81.617	81.875	81.847	81.042
MH539772 IBV/SES/15SK-02 Canada	46.62	81.36	81.216	81.562	81.389	82.747	82.474	81.472	81.59	81.75	81.85	81.936	81.734	81.792	81.763	81.734	81.648	81.619	81.648	81.763	82.051	81.907	81.677	82.08	81.85	81.706	81.677	82.474	82.57	83.162	81.014	83.78	83.78	83.405	81.965	81.965	81.936	81.734	81.821	81.922	81.475	81.331	82.195	81.619	82.051	81.445	81.706	81.677	80.895
MK937830 M41/19 China	46.62	81.389	81.245	81.59	81.417	82.804	82.474	81.472	81.619	81.779	81.878	81.965	81.706	81.821	81.792	81.763	81.677	81.648	81.677	81.792	82.08	81.936	81.706	82.109	81.878	81.734	81.706	82.474	82.599	83.162	81.043	83.838	83.838	83.463	81.994	81.994	81.965	81.763	81.85	81.95	81.504	81.36	82.224	81.648	82.08	81.473	81.734	81.706	80.924
MW446887 IBV/M41/Y192 China	46.62	81.389	81.245	81.59	81.417	82.804	82.474	81.472	81.619	81.779	81.878	81.965	81.706	81.821	81.792	81.763	81.677	81.648	81.677	81.792	82.08	81.936	81.706	82.109	81.878	81.734	81.706	82.474	82.599	83.162	81.043	83.838	83.838	83.463	81.994	81.994	81.965	81.763	81.85	81.95	81.504	81.36	82.224	81.648	82.08	81.473	81.734	81.706	80.924
MW429061 IBV/M41/Y28 China	46.62	81.389	81.245	81.59	81.417	82.804	82.474	81.472	81.619	81.779	81.878	81.965	81.706	81.821	81.792	81.763	81.677	81.648	81.677	81.792	82.08	81.936	81.706	82.109	81.878	81.734	81.706	82.474	82.599	83.162	81.043	83.838	83.838	83.463	81.994	81.994	81.965	81.763	81.85	81.95	81.504	81.36	82.224	81.648	82.08	81.473	81.734	81.706	80.924
MW446888 IBV/M41/Y27 China	46.594	81.36	81.216	81.562	81.389	82.775	82.446	81.443	81.59	81.75	81.85	81.936	81.677	81.792	81.763	81.734	81.648	81.619	81.648	81.763	82.051	81.907	81.677	82.08	81.85	81.706	81.677	82.446	82.57	83.133	81.014	83.809	83.809	83.434	81.965	81.965	81.936	81.734	81.821	81.922	81.475	81.331	82.195	81.619	82.051	81.445	81.706	81.677	80.895
MW429062 IBV/M41/N56 China	46.62	81.389	81.245	81.59	81.417	82.804	82.474	81.472	81.619	81.779	81.878	81.965	81.706	81.821	81.792	81.763	81.677	81.648	81.677	81.792	82.08	81.936	81.706	82.109	81.878	81.734	81.706	82.474	82.599	83.162	81.043	83.838	83.838	83.463	81.994	81.994	81.965	81.763	81.85	81.95	81.504	81.36	82.224	81.648	82.08	81.473	81.734	81.706	80.924
MK728875 M41-CK/17 UK	46.62	81.273	81.129	81.475	81.302	82.661	82.36	81.386	81.504	81.664	81.763	81.85	81.59	81.706	81.677	81.648	81.562	81.533	81.562	81.677	81.965	81.821	81.59	81.994	81.763	81.619	81.59	82.388	82.483	83.047	80.928	83.693	83.693	83.319	81.878	81.878	81.85	81.648	81.734	81.835	81.417	81.245	82.138	81.533	81.965	81.387	81.619	81.59	80.808
KJ435286 ck/CH/LSD/1112150 China	46.966	81.532	81.389	81.732	81.589	82.879	82.58	81.614	81.818	81.977	82.047	81.994	81.904	82.018	81.961	81.933	81.847	81.818	81.847	81.961	82.247	82.133	81.706	82.304	82.047	81.933	81.904	82.609	82.79	83.291	81.218	83.934	83.934	83.562	82.161	82.161	82.133	81.933	82.018	82.118	81.675	81.532	82.39	81.818	82.247	81.645	81.904	81.875	81.1
KY047602 gCoV/Ck/Pol/G052/16 Poland	47.276	83.662	83.705	83.391	83.305	82.396	82.836	83.461	83.605	83.548	83.533	83.434	83.676	83.734	83.533	83.705	83.562	83.591	83.619	83.734	83.562	83.562	83.521	83.505	83.819	83.848	83.762	83.291	83.819	83.205	82.018	83.305	83.276	83.676	84.391	84.391	84.42	84.22	84.334	83.062	83.19	83.047	84.42	83.848	84.019	83.648	83.791	84.334	82.304
MK581207 gCoV/Ck/Pol/G103/16 Poland	47.328	83.719	83.734	83.419	83.333	82.51	82.95	83.575	83.691	83.633	83.619	83.521	83.705	83.819	83.562	83.791	83.648	83.676	83.705	83.819	83.648	83.591	83.607	83.591	83.848	83.934	83.848	83.376	83.905	83.319	82.047	83.391	83.362	83.762	84.391	84.42	84.448	84.248	84.362	83.09	83.219	83.076	84.448	83.877	84.105	83.677	83.819	84.362	82.333
MK581208 gCoV/Ck/Pol/G225/17 Poland	47.224	83.634	83.619	83.305	83.276	82.453	82.836	83.461	83.577	83.519	83.505	83.405	83.648	83.705	83.505	83.676	83.533	83.562	83.591	83.705	83.533	83.533	83.492	83.533	83.791	83.819	83.734	83.319	83.734	83.205	81.933	83.19	83.162	83.591	84.277	84.305	84.334	84.134	84.248	82.976	83.105	82.962	84.334	83.762	83.934	83.562	83.705	84.248	82.218
MK581202 gCoV/Ck/Pol/80/89 Poland	46.785	80.131	80.017	80.017	80.131	80.407	80.673	80.872	80.513	80.575	80.786	80.608	80.501	80.558	80.501	80.643	80.558	80.586	80.615	80.672	80.615	80.529	80.149	80.501	80.473	80.786	80.501	80.956	80.786	81.013	80.501	82.551	82.551	82.921	80.558	80.615	80.586	80.387	80.529	80.714	80.757	80.416	80.615	80.387	80.473	80.328	80.473	80.501	79.391
MK581203 gCoV/Ck/Pol/162/97 Poland	46.217	79.903	79.619	79.818	79.789	80.266	79.655	80.589	80.159	80.29	80.473	80.436	80.245	80.273	80.245	80.387	80.302	80.273	80.302	80.359	80.387	80.558	80.149	80.302	80.473	80.359	80.359	80.645	80.444	80.221	79.989	81.981	81.981	82.465	80.302	80.302	80.273	80.074	80.273	80.401	80.387	80.216	80.444	80.017	80.33	80.1	80.33	80.302	79.049
MK581204 gCoV/Ck/Pol/255/97 Poland	46.192	81.468	81.268	81.325	81.725	80.289	81.152	84.36	81.982	81.912	82.039	81.871	81.753	82.125	82.182	81.896	81.81	81.839	81.868	81.925	82.125	82.096	81.842	82.125	82.067	81.982	82.01	80.727	82.182	81.635	81.496	90.948	91.005	93.232	81.525	81.496	81.468	81.268	81.439	83.31	82.067	81.696	81.582	80.982	81.325	81.037	81.582	81.382	81.468
MT591566 CK/DE/IB80/16 Germany	44.326	67.139	67.28	67.139	67.252	67.061	66.986	67.635	67.365	67.761	67.819	67.571	67.507	67.62	67.45	67.45	67.45	67.394	67.45	67.479	67.479	67.564	67.314	67.564	67.507	67.535	67.535	67.023	67.819	67.296	66.997	68.13	68.074	67.649	67.62	67.62	67.592	67.479	67.62	67.72	67.762	68.272	67.535	67.167	67.875	67.641	67.79	67.394	67.45
MN987231 IBV/ck/EGY-Monuf/USC-3/13 Egypt	46.785	83.948	84.648	84.791	83.934	83.419	83.66	84.314	84.263	84.233	84.22	84.068	84.334	84.42	84.191	84.334	84.191	84.22	84.248	84.362	84.563	84.362	84.097	84.448	84.391	84.391	84.362	84.058	84.42	84.143	83.877	82.075	82.047	82.39	85.878	85.906	85.935	85.735	85.963	85.549	85.163	84.191	85.963	85.334	85.706	85.451	85.106	85.849	83.391
KR608272 LDT3-A/03 China	47.25	89.037	88.336	88.622	89.48	90.517	90.878	89.287	89.909	90.031	89.994	89.888	89.337	90.166	89.48	90.08	90.051	90.023	89.994	90.109	91.338	90.852	89.744	91.109	90.08	90.109	89.794	90.452	90.881	93.35	87.736	85.22	85.22	82.819	88.679	88.708	88.679	88.536	88.593	87.864	87.736	86.65	88.651	88.165	88.393	87.636	87.993	88.479	85.306
MK574042 ck/CH/LHB/110615/19 China	43.894	70.83	70.901	70.759	70.986	70.113	70.254	69.944	71.018	71.096	71.242	70.962	70.872	71.299	70.986	71.128	71.043	71.071	71.1	71.157	71.1	71.043	70.676	70.986	71.1	71.014	71.213	70.395	70.503	70.028	72.208	70.872	70.872	71.213	71.071	71.213	71.185	70.986	71.071	71	71.071	70.929	71.157	70.673	70.759	70.205	71.128	71.043	69.878
MK574043 ck/CH/LHB/110627/19 China	43.868	70.83	70.901	70.759	70.986	70.113	70.254	69.944	71.018	71.096	71.242	70.962	70.872	71.299	70.986	71.128	71.043	71.071	71.1	71.157	71.1	71.043	70.676	70.986	71.1	71.014	71.213	70.395	70.503	70.028	72.208	70.872	70.872	71.213	71.071	71.213	71.185	70.986	71.071	71	71.071	70.929	71.157	70.673	70.759	70.205	71.128	71.043	69.878
MN548286 D1466/84 UK	42.872	66.571	66.571	66.6	66.6	66.6	66.989	67.416	66.743	66.714	67.029	67.086	66.714	66.857	66.886	66.886	66.829	66.914	66.914	66.971	66.686	66.886	66.771	66.714	66.886	66.771	66.514	66.742	66.657	67.103	66.686	67.229	67.2	67.114	66.486	66.514	66.514	66.4	66.486	66.871	66.714	67.4	66.629	66.257	66.743	66.433	66.571	66.457	66.229
[truncated: 52 more columns]

## Sheet: 3a
Table S1d. Nucleotide identities between sequences in the QX dataset (n=101). Gene 3a.
	KR822424 TCoV/080385d/08 France	OM525802 D532/9/CH/05	KX219797 ck/CH/LXJ/02I/16 China	KX252772 ck/CH/LSHH/03II/16 China	KX252778 ck/CH/LJL/05I/16 China	HQ848267 GX-YL5/05 China	KF411041 CK/CH/LGX/091109/13 China	KP118886 ck/CH/LSD/111235/14 China	KX185058 ck/CH/LGS/08I/16 China	KX219791 ck/CH/LHLJ/07I/16 China	KX219792 ck/CH/LGS/06I/16 China	KX375805 ck/CH/LJS/07V/16 China	KX252789 ck/CH/LHLJ/090605/16 China	KX252777 ck/CH/LSD/07I/16 China	KX364293 ck/CH/LJL/07III/16 China	KX219794 ck/CH/LJS/101109/16 China	KX236009 ck/CH/LSX/130132/16 China	KX259250 ck/CH/LJS/101113/16 China	KX302862 ck/CH/LJS/101111/16 China	KX364299 ck/CH/LSD/101223/16 China	KX236007 ck/CH/LSD/100408/16 China	KX219801 ck/CH/LSD/120437/16 China	MK032181 gCoV/ck/Chi/I0347/11 China	KX275391 ck/CH/LHLJ/140927/16 China	KX219800 ck/CH/LSD/130611/16 China	KX252787 ck/CH/LLN/131040/16/ China	KX252785 ck/CH/LSD/100311/16 China	KY407556 gCoV/ck/Chi/I0114/14 China	MK618759 K047-12/12 Korea	HM245924 CQ04-1/04 China	KX252779 ck/CH/LLN/06I/16 China	MK032177 gCoV/ck/Chi/I0724/17 China	MK032179 gCoV/ck/Chi/I0922/17 China	MK032180 gCoV/ck/China/I0737/17 China	OM525803 D535/4/FR/05	KY933089 1148-A/field/17 UK	MN548289 QX UK	KY933090 L1148/vaccine/17 UK	MK581205 gCoV/Ck/Pol/548/04 Poland	OM525806 D722/SK/06	OM525804 D591/2/GR/05	KX272465 AR251-15/14 Sudan	FN430414 ITA/90254/05 Italy	JQ088078 CK/SWE/065/8946/10 Sweden	KT886454 gCoV/Ck/Pol/74/09 Poland	MK581206 gCoV/Ck/Pol/195/12 Poland	OM525805 D683/HU/06	KX236001 ck/CH/LSD/03I/16 China	KP662631 ck/ZA/3665/11 South Africa
KR822424 TCoV/080385d/08 France	83.333	83.333	83.333	81.034	85.632	81.034	84.483	81.609	80.46	81.034	81.034	81.609	82.759	81.609	80.46	80.46	81.034	80.46	80.46	83.908	83.908	80.46	83.908	81.609	80.46	81.609	84.483	86.207	84.483	82.759	93.678	93.678	93.678	82.184	82.184	82.184	82.184	83.333	85.632	82.759	94.828	82.759	81.609	94.828	93.103	89.655	63.218	95.977	93.678
OM525802 D532/9/CH/05	83.333		98.276	91.954	92.529	88.506	83.908	86.207	84.483	83.333	83.908	83.908	84.483	85.632	84.483	83.333	83.333	83.908	83.333	83.333	97.701	97.701	83.333	97.701	84.483	83.333	84.483	86.782	86.207	86.782	83.333	86.782	86.782	86.782	95.402	95.402	95.402	95.402	93.678	87.931	95.977	85.632	95.402	94.828	85.057	86.207	86.207	73.563	85.057
KX219797 ck/CH/LXJ/02I/16 China	83.333	98.276		91.954	93.103	88.506	84.483	86.782	85.057	83.908	84.483	84.483	85.057	86.207	85.057	83.908	83.908	84.483	83.908	83.908	98.276	98.276	83.908	98.276	85.057	83.908	85.057	87.356	86.207	87.356	83.333	86.782	86.782	86.782	95.977	95.977	95.977	95.977	93.678	87.931	96.552	84.483	95.402	95.402	85.057	86.207	86.207	74.138	85.057
KX252772 ck/CH/LSHH/03II/16 China	83.333	91.954	91.954		90.805	86.207	83.333	84.483	82.759	81.609	82.184	82.184	82.759	83.908	82.759	81.609	81.609	82.184	81.609	81.609	93.678	93.678	81.609	93.678	82.759	81.609	82.759	85.632	86.207	85.057	82.759	85.632	85.632	85.632	91.954	91.954	91.954	91.954	90.805	87.356	92.529	85.632	92.529	91.379	86.207	85.057	87.356	68.966	86.207
KX252778 ck/CH/LJL/05I/16 China	81.034	92.529	93.103	90.805		88.506	86.782	86.207	86.207	85.057	85.632	85.632	86.207	87.356	86.207	86.207	86.207	85.632	86.207	86.207	94.828	94.828	85.057	94.828	86.207	86.207	86.207	86.782	83.908	86.782	81.609	84.483	84.483	84.483	92.529	92.529	92.529	92.529	90.805	85.632	93.103	82.759	91.954	91.954	83.333	83.908	84.483	70.115	83.333
HQ848267 GX-YL5/05 China	85.632	88.506	88.506	86.207	88.506		91.954	93.103	92.529	91.379	91.954	91.954	92.529	93.678	92.529	91.379	91.379	91.954	91.379	91.379	90.23	90.23	91.379	90.23	92.529	91.379	92.529	93.678	81.609	93.678	85.632	89.08	89.08	89.08	87.931	87.931	87.931	87.931	86.207	88.506	88.506	87.356	87.356	87.356	87.356	88.506	87.356	66.667	87.356
KF411041 CK/CH/LGX/091109/13 China	81.034	83.908	84.483	83.333	86.782	91.954		91.954	99.425	98.276	98.851	98.851	99.425	98.276	99.425	98.276	98.276	98.851	98.276	98.276	86.207	86.207	98.276	86.207	99.425	98.276	99.425	90.23	78.736	92.529	81.609	83.908	83.908	83.908	83.908	83.908	83.908	83.908	81.034	84.483	84.483	81.609	83.333	84.483	82.184	83.333	82.759	61.494	82.184
KP118886 ck/CH/LSD/111235/14 China	84.483	86.207	86.782	84.483	86.207	93.103	91.954		92.529	91.379	91.954	91.954	92.529	92.529	92.529	91.379	91.379	91.954	91.379	91.379	88.506	88.506	91.379	88.506	92.529	91.379	92.529	96.552	81.034	98.851	83.333	86.782	86.782	86.782	86.207	86.207	86.207	86.207	83.333	86.207	86.782	84.483	85.632	86.782	85.632	86.207	85.057	64.368	85.057
KX185058 ck/CH/LGS/08I/16 China	81.609	84.483	85.057	82.759	86.207	92.529	99.425	92.529		98.851	99.425	99.425	100	98.851	100	98.851	98.851	99.425	98.851	98.851	86.782	86.782	98.851	86.782	100	98.851	100	90.805	79.31	93.103	81.609	84.483	84.483	84.483	84.483	84.483	84.483	84.483	81.609	83.908	85.057	82.184	83.908	85.057	82.759	83.908	83.333	61.494	82.759
KX219791 ck/CH/LHLJ/07I/16 China	80.46	83.333	83.908	81.609	85.057	91.379	98.276	91.379	98.851		99.425	99.425	98.851	97.701	98.851	98.851	98.851	99.425	98.851	98.851	85.632	85.632	98.851	85.632	98.851	98.851	98.851	89.655	78.161	91.954	81.034	83.333	83.333	83.333	83.333	83.333	83.333	83.333	80.46	82.759	83.908	81.034	82.759	83.908	81.609	82.759	82.184	60.345	81.609
KX219792 ck/CH/LGS/06I/16 China	81.034	83.908	84.483	82.184	85.632	91.954	98.851	91.954	99.425	99.425		100	99.425	98.276	99.425	99.425	99.425	100	99.425	99.425	86.207	86.207	98.276	86.207	99.425	99.425	99.425	90.23	78.736	92.529	81.034	83.908	83.908	83.908	83.908	83.908	83.908	83.908	81.034	83.333	84.483	81.609	83.333	84.483	82.184	83.333	82.759	60.92	82.184
KX375805 ck/CH/LJS/07V/16 China	81.034	83.908	84.483	82.184	85.632	91.954	98.851	91.954	99.425	99.425	100		99.425	98.276	99.425	99.425	99.425	100	99.425	99.425	86.207	86.207	98.276	86.207	99.425	99.425	99.425	90.23	78.736	92.529	81.034	83.908	83.908	83.908	83.908	83.908	83.908	83.908	81.034	83.333	84.483	81.609	83.333	84.483	82.184	83.333	82.759	60.92	82.184
KX252789 ck/CH/LHLJ/090605/16 China	81.609	84.483	85.057	82.759	86.207	92.529	99.425	92.529	100	98.851	99.425	99.425		98.851	100	98.851	98.851	99.425	98.851	98.851	86.782	86.782	98.851	86.782	100	98.851	100	90.805	79.31	93.103	81.609	84.483	84.483	84.483	84.483	84.483	84.483	84.483	81.609	83.908	85.057	82.184	83.908	85.057	82.759	83.908	83.333	61.494	82.759
KX252777 ck/CH/LSD/07I/16 China	82.759	85.632	86.207	83.908	87.356	93.678	98.276	92.529	98.851	97.701	98.276	98.276	98.851		98.851	97.701	97.701	98.276	97.701	97.701	87.931	87.931	97.701	87.931	98.851	97.701	98.851	91.954	80.46	93.103	82.759	85.632	85.632	85.632	85.632	85.632	85.632	85.632	82.759	85.057	86.207	83.333	85.057	85.057	83.908	85.057	84.483	62.644	83.908
KX364293 ck/CH/LJL/07III/16 China	81.609	84.483	85.057	82.759	86.207	92.529	99.425	92.529	100	98.851	99.425	99.425	100	98.851		98.851	98.851	99.425	98.851	98.851	86.782	86.782	98.851	86.782	100	98.851	100	90.805	79.31	93.103	81.609	84.483	84.483	84.483	84.483	84.483	84.483	84.483	81.609	83.908	85.057	82.184	83.908	85.057	82.759	83.908	83.333	61.494	82.759
KX219794 ck/CH/LJS/101109/16 China	80.46	83.333	83.908	81.609	86.207	91.379	98.276	91.379	98.851	98.851	99.425	99.425	98.851	97.701	98.851		100	99.425	100	100	85.632	85.632	97.701	85.632	98.851	100	98.851	89.655	78.161	91.954	81.609	83.333	83.333	83.333	83.333	83.333	83.333	83.333	80.46	82.759	83.908	81.034	82.759	83.908	81.609	82.759	82.184	60.345	81.609
KX236009 ck/CH/LSX/130132/16 China	80.46	83.333	83.908	81.609	86.207	91.379	98.276	91.379	98.851	98.851	99.425	99.425	98.851	97.701	98.851	100		99.425	100	100	85.632	85.632	97.701	85.632	98.851	100	98.851	89.655	78.161	91.954	81.609	83.333	83.333	83.333	83.333	83.333	83.333	83.333	80.46	82.759	83.908	81.034	82.759	83.908	81.609	82.759	82.184	60.345	81.609
KX259250 ck/CH/LJS/101113/16 China	81.034	83.908	84.483	82.184	85.632	91.954	98.851	91.954	99.425	99.425	100	100	99.425	98.276	99.425	99.425	99.425		99.425	99.425	86.207	86.207	98.276	86.207	99.425	99.425	99.425	90.23	78.736	92.529	81.034	83.908	83.908	83.908	83.908	83.908	83.908	83.908	81.034	83.333	84.483	81.609	83.333	84.483	82.184	83.333	82.759	60.92	82.184
KX302862 ck/CH/LJS/101111/16 China	80.46	83.333	83.908	81.609	86.207	91.379	98.276	91.379	98.851	98.851	99.425	99.425	98.851	97.701	98.851	100	100	99.425		100	85.632	85.632	97.701	85.632	98.851	100	98.851	89.655	78.161	91.954	81.609	83.333	83.333	83.333	83.333	83.333	83.333	83.333	80.46	82.759	83.908	81.034	82.759	83.908	81.609	82.759	82.184	60.345	81.609
KX364299 ck/CH/LSD/101223/16 China	80.46	83.333	83.908	81.609	86.207	91.379	98.276	91.379	98.851	98.851	99.425	99.425	98.851	97.701	98.851	100	100	99.425	100		85.632	85.632	97.701	85.632	98.851	100	98.851	89.655	78.161	91.954	81.609	83.333	83.333	83.333	83.333	83.333	83.333	83.333	80.46	82.759	83.908	81.034	82.759	83.908	81.609	82.759	82.184	60.345	81.609
KX236007 ck/CH/LSD/100408/16 China	83.908	97.701	98.276	93.678	94.828	90.23	86.207	88.506	86.782	85.632	86.207	86.207	86.782	87.931	86.782	85.632	85.632	86.207	85.632	85.632		100	85.632	100	86.782	85.632	86.782	89.08	86.782	89.08	82.759	87.356	87.356	87.356	97.701	97.701	97.701	97.701	94.828	88.506	98.276	85.632	97.126	97.126	86.207	86.782	86.782	74.138	86.207
KX219801 ck/CH/LSD/120437/16 China	83.908	97.701	98.276	93.678	94.828	90.23	86.207	88.506	86.782	85.632	86.207	86.207	86.782	87.931	86.782	85.632	85.632	86.207	85.632	85.632	100		85.632	100	86.782	85.632	86.782	89.08	86.782	89.08	82.759	87.356	87.356	87.356	97.701	97.701	97.701	97.701	94.828	88.506	98.276	85.632	97.126	97.126	86.207	86.782	86.782	74.138	86.207
MK032181 gCoV/ck/Chi/I0347/11 China	80.46	83.333	83.908	81.609	85.057	91.379	98.276	91.379	98.851	98.851	98.276	98.276	98.851	97.701	98.851	97.701	97.701	98.276	97.701	97.701	85.632	85.632		85.632	98.851	97.701	98.851	89.655	78.161	91.954	81.034	83.333	83.333	83.333	83.333	83.333	83.333	83.333	80.46	82.759	83.908	81.034	82.759	83.908	81.609	82.759	82.184	60.345	81.609
KX275391 ck/CH/LHLJ/140927/16 China	83.908	97.701	98.276	93.678	94.828	90.23	86.207	88.506	86.782	85.632	86.207	86.207	86.782	87.931	86.782	85.632	85.632	86.207	85.632	85.632	100	100	85.632		86.782	85.632	86.782	89.08	86.782	89.08	82.759	87.356	87.356	87.356	97.701	97.701	97.701	97.701	94.828	88.506	98.276	85.632	97.126	97.126	86.207	86.782	86.782	74.138	86.207
KX219800 ck/CH/LSD/130611/16 China	81.609	84.483	85.057	82.759	86.207	92.529	99.425	92.529	100	98.851	99.425	99.425	100	98.851	100	98.851	98.851	99.425	98.851	98.851	86.782	86.782	98.851	86.782		98.851	100	90.805	79.31	93.103	81.609	84.483	84.483	84.483	84.483	84.483	84.483	84.483	81.609	83.908	85.057	82.184	83.908	85.057	82.759	83.908	83.333	61.494	82.759
KX252787 ck/CH/LLN/131040/16/ China	80.46	83.333	83.908	81.609	86.207	91.379	98.276	91.379	98.851	98.851	99.425	99.425	98.851	97.701	98.851	100	100	99.425	100	100	85.632	85.632	97.701	85.632	98.851		98.851	89.655	78.161	91.954	81.609	83.333	83.333	83.333	83.333	83.333	83.333	83.333	80.46	82.759	83.908	81.034	82.759	83.908	81.609	82.759	82.184	60.345	81.609
KX252785 ck/CH/LSD/100311/16 China	81.609	84.483	85.057	82.759	86.207	92.529	99.425	92.529	100	98.851	99.425	99.425	100	98.851	100	98.851	98.851	99.425	98.851	98.851	86.782	86.782	98.851	86.782	100	98.851		90.805	79.31	93.103	81.609	84.483	84.483	84.483	84.483	84.483	84.483	84.483	81.609	83.908	85.057	82.184	83.908	85.057	82.759	83.908	83.333	61.494	82.759
KY407556 gCoV/ck/Chi/I0114/14 China	84.483	86.782	87.356	85.632	86.782	93.678	90.23	96.552	90.805	89.655	90.23	90.23	90.805	91.954	90.805	89.655	89.655	90.23	89.655	89.655	89.08	89.08	89.655	89.08	90.805	89.655	90.805		81.034	97.701	84.483	86.782	86.782	86.782	86.782	86.782	86.782	86.782	83.908	86.207	87.356	84.483	86.207	86.207	85.632	86.207	85.632	64.943	85.057
MK618759 K047-12/12 Korea	86.207	86.207	86.207	86.207	83.908	81.609	78.736	81.034	79.31	78.161	78.736	78.736	79.31	80.46	79.31	78.161	78.161	78.736	78.161	78.161	86.782	86.782	78.161	86.782	79.31	78.161	79.31	81.034		81.034	79.31	88.506	88.506	88.506	84.483	84.483	84.483	84.483	84.483	85.632	85.057	86.207	85.057	83.908	86.207	87.931	86.207	64.368	87.356
HM245924 CQ04-1/04 China	84.483	86.782	87.356	85.057	86.782	93.678	92.529	98.851	93.103	91.954	92.529	92.529	93.103	93.103	93.103	91.954	91.954	92.529	91.954	91.954	89.08	89.08	91.954	89.08	93.103	91.954	93.103	97.701	81.034		83.908	86.782	86.782	86.782	86.782	86.782	86.782	86.782	83.908	86.207	87.356	84.483	86.207	87.356	85.632	86.207	85.632	64.943	85.057
KX252779 ck/CH/LLN/06I/16 China	82.759	83.333	83.333	82.759	81.609	85.632	81.609	83.333	81.609	81.034	81.034	81.034	81.609	82.759	81.609	81.609	81.609	81.034	81.609	81.609	82.759	82.759	81.034	82.759	81.609	81.609	81.609	84.483	79.31	83.908		85.632	85.632	85.632	80.46	80.46	80.46	80.46	81.609	82.184	81.034	83.333	81.034	79.885	85.057	85.057	81.034	62.644	83.908
MK032177 gCoV/ck/Chi/I0724/17 China	93.678	86.782	86.782	85.632	84.483	89.08	83.908	86.782	84.483	83.333	83.908	83.908	84.483	85.632	84.483	83.333	83.333	83.908	83.333	83.333	87.356	87.356	83.333	87.356	84.483	83.333	84.483	86.782	88.506	86.782	85.632		100	100	85.057	85.057	85.057	85.057	86.207	87.931	85.632	94.253	85.632	84.483	94.253	99.425	90.805	64.943	95.402
MK032179 gCoV/ck/Chi/I0922/17 China	93.678	86.782	86.782	85.632	84.483	89.08	83.908	86.782	84.483	83.333	83.908	83.908	84.483	85.632	84.483	83.333	83.333	83.908	83.333	83.333	87.356	87.356	83.333	87.356	84.483	83.333	84.483	86.782	88.506	86.782	85.632	100		100	85.057	85.057	85.057	85.057	86.207	87.931	85.632	94.253	85.632	84.483	94.253	99.425	90.805	64.943	95.402
MK032180 gCoV/ck/China/I0737/17 China	93.678	86.782	86.782	85.632	84.483	89.08	83.908	86.782	84.483	83.333	83.908	83.908	84.483	85.632	84.483	83.333	83.333	83.908	83.333	83.333	87.356	87.356	83.333	87.356	84.483	83.333	84.483	86.782	88.506	86.782	85.632	100	100		85.057	85.057	85.057	85.057	86.207	87.931	85.632	94.253	85.632	84.483	94.253	99.425	90.805	64.943	95.402
OM525803 D535/4/FR/05	82.184	95.402	95.977	91.954	92.529	87.931	83.908	86.207	84.483	83.333	83.908	83.908	84.483	85.632	84.483	83.333	83.333	83.908	83.333	83.333	97.701	97.701	83.333	97.701	84.483	83.333	84.483	86.782	84.483	86.782	80.46	85.057	85.057	85.057		100	100	100	93.678	86.207	99.425	83.908	99.425	97.701	84.483	84.483	85.057	74.713	84.483
KY933089 1148-A/field/17 UK	82.184	95.402	95.977	91.954	92.529	87.931	83.908	86.207	84.483	83.333	83.908	83.908	84.483	85.632	84.483	83.333	83.333	83.908	83.333	83.333	97.701	97.701	83.333	97.701	84.483	83.333	84.483	86.782	84.483	86.782	80.46	85.057	85.057	85.057	100		100	100	93.678	86.207	99.425	83.908	99.425	97.701	84.483	84.483	85.057	74.713	84.483
MN548289 QX UK	82.184	95.402	95.977	91.954	92.529	87.931	83.908	86.207	84.483	83.333	83.908	83.908	84.483	85.632	84.483	83.333	83.333	83.908	83.333	83.333	97.701	97.701	83.333	97.701	84.483	83.333	84.483	86.782	84.483	86.782	80.46	85.057	85.057	85.057	100	100		100	93.678	86.207	99.425	83.908	99.425	97.701	84.483	84.483	85.057	74.713	84.483
KY933090 L1148/vaccine/17 UK	82.184	95.402	95.977	91.954	92.529	87.931	83.908	86.207	84.483	83.333	83.908	83.908	84.483	85.632	84.483	83.333	83.333	83.908	83.333	83.333	97.701	97.701	83.333	97.701	84.483	83.333	84.483	86.782	84.483	86.782	80.46	85.057	85.057	85.057	100	100	100		93.678	86.207	99.425	83.908	99.425	97.701	84.483	84.483	85.057	74.713	84.483
MK581205 gCoV/Ck/Pol/548/04 Poland	83.333	93.678	93.678	90.805	90.805	86.207	81.034	83.333	81.609	80.46	81.034	81.034	81.609	82.759	81.609	80.46	80.46	81.034	80.46	80.46	94.828	94.828	80.46	94.828	81.609	80.46	81.609	83.908	84.483	83.908	81.609	86.207	86.207	86.207	93.678	93.678	93.678	93.678		89.655	94.253	85.632	94.253	92.529	86.207	85.632	86.207	72.414	86.207
OM525806 D722/SK/06	85.632	87.931	87.931	87.356	85.632	88.506	84.483	86.207	83.908	82.759	83.333	83.333	83.908	85.057	83.908	82.759	82.759	83.333	82.759	82.759	88.506	88.506	82.759	88.506	83.908	82.759	83.908	86.207	85.632	86.207	82.184	87.931	87.931	87.931	86.207	86.207	86.207	86.207	89.655		86.782	85.632	86.782	85.632	86.207	87.356	89.08	65.517	86.207
OM525804 D591/2/GR/05	82.759	95.977	96.552	92.529	93.103	88.506	84.483	86.782	85.057	83.908	84.483	84.483	85.057	86.207	85.057	83.908	83.908	84.483	83.908	83.908	98.276	98.276	83.908	98.276	85.057	83.908	85.057	87.356	85.057	87.356	81.034	85.632	85.632	85.632	99.425	99.425	99.425	99.425	94.253	86.782		84.483	98.851	97.126	85.057	85.057	85.632	75.287	85.057
KX272465 AR251-15/14 Sudan	94.828	85.632	84.483	85.632	82.759	87.356	81.609	84.483	82.184	81.034	81.609	81.609	82.184	83.333	82.184	81.034	81.034	81.609	81.034	81.034	85.632	85.632	81.034	85.632	82.184	81.034	82.184	84.483	86.207	84.483	83.333	94.253	94.253	94.253	83.908	83.908	83.908	83.908	85.632	85.632	84.483		84.483	83.333	98.276	93.678	89.08	64.943	98.851
FN430414 ITA/90254/05 Italy	82.759	95.402	95.402	92.529	91.954	87.356	83.333	85.632	83.908	82.759	83.333	83.333	83.908	85.057	83.908	82.759	82.759	83.333	82.759	82.759	97.126	97.126	82.759	97.126	83.908	82.759	83.908	86.207	85.057	86.207	81.034	85.632	85.632	85.632	99.425	99.425	99.425	99.425	94.253	86.782	98.851	84.483		97.126	85.057	85.057	85.632	74.138	85.057
JQ088078 CK/SWE/065/8946/10 Sweden	81.609	94.828	95.402	91.379	91.954	87.356	84.483	86.782	85.057	83.908	84.483	84.483	85.057	85.057	85.057	83.908	83.908	84.483	83.908	83.908	97.126	97.126	83.908	97.126	85.057	83.908	85.057	86.207	83.908	87.356	79.885	84.483	84.483	84.483	97.701	97.701	97.701	97.701	92.529	85.632	97.126	83.333	97.126		83.908	83.908	84.483	73.563	83.908
KT886454 gCoV/Ck/Pol/74/09 Poland	94.828	85.057	85.057	86.207	83.333	87.356	82.184	85.632	82.759	81.609	82.184	82.184	82.759	83.908	82.759	81.609	81.609	82.184	81.609	81.609	86.207	86.207	81.609	86.207	82.759	81.609	82.759	85.632	86.207	85.632	85.057	94.253	94.253	94.253	84.483	84.483	84.483	84.483	86.207	86.207	85.057	98.276	85.057	83.908		93.678	89.655	64.943	98.851
MK581206 gCoV/Ck/Pol/195/12 Poland	93.103	86.207	86.207	85.057	83.908	88.506	83.333	86.207	83.908	82.759	83.333	83.333	83.908	85.057	83.908	82.759	82.759	83.333	82.759	82.759	86.782	86.782	82.759	86.782	83.908	82.759	83.908	86.207	87.931	86.207	85.057	99.425	99.425	99.425	84.483	84.483	84.483	84.483	85.632	87.356	85.057	93.678	85.057	83.908	93.678		90.23	64.368	94.828
OM525805 D683/HU/06	89.655	86.207	86.207	87.356	84.483	87.356	82.759	85.057	83.333	82.184	82.759	82.759	83.333	84.483	83.333	82.184	82.184	82.759	82.184	82.184	86.782	86.782	82.184	86.782	83.333	82.184	83.333	85.632	86.207	85.632	81.034	90.805	90.805	90.805	85.057	85.057	85.057	85.057	86.207	89.08	85.632	89.08	85.632	84.483	89.655	90.23		64.368	90.23
KX236001 ck/CH/LSD/03I/16 China	63.218	73.563	74.138	68.966	70.115	66.667	61.494	64.368	61.494	60.345	60.92	60.92	61.494	62.644	61.494	60.345	60.345	60.92	60.345	60.345	74.138	74.138	60.345	74.138	61.494	60.345	61.494	64.943	64.368	64.943	62.644	64.943	64.943	64.943	74.713	74.713	74.713	74.713	72.414	65.517	75.287	64.943	74.138	73.563	64.943	64.368	64.368		64.943
KP662631 ck/ZA/3665/11 South Africa	95.977	85.057	85.057	86.207	83.333	87.356	82.184	85.057	82.759	81.609	82.184	82.184	82.759	83.908	82.759	81.609	81.609	82.184	81.609	81.609	86.207	86.207	81.609	86.207	82.759	81.609	82.759	85.057	87.356	85.057	83.908	95.402	95.402	95.402	84.483	84.483	84.483	84.483	86.207	86.207	85.057	98.851	85.057	83.908	98.851	94.828	90.23	64.943
KF377577 4/91 vaccine China	93.678	86.782	86.782	85.632	84.483	89.08	83.908	86.782	84.483	83.333	83.908	83.908	84.483	85.632	84.483	83.333	83.333	83.908	83.333	83.333	87.356	87.356	83.333	87.356	84.483	83.333	84.483	86.782	88.506	86.782	85.632	100	100	100	85.057	85.057	85.057	85.057	86.207	87.931	85.632	94.253	85.632	84.483	94.253	99.425	90.805	64.943	95.402
KP118881 ck/CH/LBJ/140413/14 China	93.678	86.782	86.782	85.632	84.483	89.08	83.908	86.782	84.483	83.333	83.908	83.908	84.483	85.632	84.483	83.333	83.333	83.908	83.333	83.333	87.356	87.356	83.333	87.356	84.483	83.333	84.483	86.782	88.506	86.782	85.632	100	100	100	85.057	85.057	85.057	85.057	86.207	87.931	85.632	94.253	85.632	84.483	94.253	99.425	90.805	64.943	95.402
KP118880 ck/CH/LHB/130927/14 China	93.678	86.782	86.782	85.632	84.483	89.08	83.908	86.782	84.483	83.333	83.908	83.908	84.483	85.632	84.483	83.333	83.333	83.908	83.333	83.333	87.356	87.356	83.333	87.356	84.483	83.333	84.483	86.782	88.506	86.782	85.632	100	100	100	85.057	85.057	85.057	85.057	86.207	87.931	85.632	94.253	85.632	84.483	94.253	99.425	90.805	64.943	95.402
KP118888 ck/CH/LLN/130102/15 China	93.678	86.782	86.782	85.632	84.483	89.08	83.908	86.782	84.483	83.333	83.908	83.908	84.483	85.632	84.483	83.333	83.333	83.908	83.333	83.333	87.356	87.356	83.333	87.356	84.483	83.333	84.483	86.782	88.506	86.782	85.632	100	100	100	85.057	85.057	85.057	85.057	86.207	87.931	85.632	94.253	85.632	84.483	94.253	99.425	90.805	64.943	95.402
MZ367369 IBV/Ck/Bel/4134_001/19 Belgium	93.678	86.782	86.782	85.632	84.483	89.08	83.908	86.782	84.483	83.333	83.908	83.908	84.483	85.632	84.483	83.333	83.333	83.908	83.333	83.333	87.356	87.356	83.333	87.356	84.483	83.333	84.483	86.782	88.506	86.782	85.632	100	100	100	85.057	85.057	85.057	85.057	86.207	87.931	85.632	94.253	85.632	84.483	94.253	99.425	90.805	64.943	95.402
KP118884 ck/CH/LSD/110651/15 China	93.678	86.782	86.782	85.632	84.483	89.08	83.908	86.782	84.483	83.333	83.908	83.908	84.483	85.632	84.483	83.333	83.333	83.908	83.333	83.333	87.356	87.356	83.333	87.356	84.483	83.333	84.483	86.782	88.506	86.782	85.632	100	100	100	85.057	85.057	85.057	85.057	86.207	87.931	85.632	94.253	85.632	84.483	94.253	99.425	90.805	64.943	95.402
KP118882 ck/CH/LBJ/140402/14 China	93.678	86.782	86.782	85.632	84.483	89.08	83.908	86.782	84.483	83.333	83.908	83.908	84.483	85.632	84.483	83.333	83.333	83.908	83.333	83.333	87.356	87.356	83.333	87.356	84.483	83.333	84.483	86.782	88.506	86.782	85.632	100	100	100	85.057	85.057	85.057	85.057	86.207	87.931	85.632	94.253	85.632	84.483	94.253	99.425	90.805	64.943	95.402
KP118892 ck/CH/LLN/120101 China	93.678	86.782	86.782	85.632	84.483	89.08	83.908	86.782	84.483	83.333	83.908	83.908	84.483	85.632	84.483	83.333	83.333	83.908	83.333	83.333	87.356	87.356	83.333	87.356	84.483	83.333	84.483	86.782	88.506	86.782	85.632	100	100	100	85.057	85.057	85.057	85.057	86.207	87.931	85.632	94.253	85.632	84.483	94.253	99.425	90.805	64.943	95.402
KP118891 ck/CH/LHLJ/111246/14 China	93.678	86.782	86.782	85.632	84.483	89.08	83.908	86.782	84.483	83.333	83.908	83.908	84.483	85.632	84.483	83.333	83.333	83.908	83.333	83.333	87.356	87.356	83.333	87.356	84.483	83.333	84.483	86.782	88.506	86.782	85.632	100	100	100	85.057	85.057	85.057	85.057	86.207	87.931	85.632	94.253	85.632	84.483	94.253	99.425	90.805	64.943	95.402
KP118893 ck/CH/LSD/110410/14 China	94.253	86.207	86.207	85.057	83.908	89.08	83.908	86.782	84.483	83.333	83.908	83.908	84.483	85.632	84.483	83.333	83.333	83.908	83.333	83.333	86.782	86.782	83.333	86.782	84.483	83.333	84.483	86.782	89.08	86.782	85.057	99.425	99.425	99.425	84.483	84.483	84.483	84.483	85.632	88.506	85.057	93.678	85.057	83.908	93.678	98.851	91.379	64.368	94.828
KP036503 ck/CH/LHB/121010 China	93.678	86.782	86.782	85.632	84.483	89.08	83.908	86.782	84.483	83.333	83.908	83.908	84.483	85.632	84.483	83.333	83.333	83.908	83.333	83.333	87.356	87.356	83.333	87.356	84.483	83.333	84.483	86.782	88.506	86.782	85.632	100	100	100	85.057	85.057	85.057	85.057	86.207	87.931	85.632	94.253	85.632	84.483	94.253	99.425	90.805	64.943	95.402
KP036504 ck/CH/LHB/130630 China	93.678	86.782	86.782	85.632	84.483	89.08	83.908	86.782	84.483	83.333	83.908	83.908	84.483	85.632	84.483	83.333	83.333	83.908	83.333	83.333	87.356	87.356	83.333	87.356	84.483	83.333	84.483	86.782	88.506	86.782	85.632	100	100	100	85.057	85.057	85.057	85.057	86.207	87.931	85.632	94.253	85.632	84.483	94.253	99.425	90.805	64.943	95.402
KP118883 ck/CH/LHB/121041 China	93.678	86.782	86.782	85.632	84.483	89.08	83.908	86.782	84.483	83.333	83.908	83.908	84.483	85.632	84.483	83.333	83.333	83.908	83.333	83.333	87.356	87.356	83.333	87.356	84.483	83.333	84.483	86.782	88.506	86.782	85.632	100	100	100	85.057	85.057	85.057	85.057	86.207	87.931	85.632	94.253	85.632	84.483	94.253	99.425	90.805	64.943	95.402
KP118887 ck/CH/LHB/140532/14 China	93.678	86.782	86.782	85.632	84.483	89.08	83.908	86.782	84.483	83.333	83.908	83.908	84.483	85.632	84.483	83.333	83.333	83.908	83.333	83.333	87.356	87.356	83.333	87.356	84.483	83.333	84.483	86.782	88.506	86.782	85.632	100	100	100	85.057	85.057	85.057	85.057	86.207	87.931	85.632	94.253	85.632	84.483	94.253	99.425	90.805	64.943	95.402
KP118885 ck/CH/LSD/110857/14 China	93.678	86.782	86.782	85.632	84.483	89.08	83.908	86.782	84.483	83.333	83.908	83.908	84.483	85.632	84.483	83.333	83.333	83.908	83.333	83.333	87.356	87.356	83.333	87.356	84.483	83.333	84.483	86.782	88.506	86.782	85.632	100	100	100	85.057	85.057	85.057	85.057	86.207	87.931	85.632	94.253	85.632	84.483	94.253	99.425	90.805	64.943	95.402
KP036502 ck/CH/LHLJ/140906 China	93.678	86.782	86.782	85.632	84.483	89.08	83.908	86.782	84.483	83.333	83.908	83.908	84.483	85.632	84.483	83.333	83.333	83.908	83.333	83.333	87.356	87.356	83.333	87.356	84.483	83.333	84.483	86.782	88.506	86.782	85.632	100	100	100	85.057	85.057	85.057	85.057	86.207	87.931	85.632	94.253	85.632	84.483	94.253	99.425	90.805	64.943	95.402
KJ135013 IBVUkr27/11 Ukraine	93.103	86.207	86.207	85.057	83.908	88.506	83.333	86.207	83.908	82.759	83.333	83.333	83.908	85.057	83.908	82.759	82.759	83.333	82.759	82.759	86.782	86.782	82.759	86.782	83.908	82.759	83.908	86.207	87.931	86.207	85.057	99.425	99.425	99.425	84.483	84.483	84.483	84.483	85.632	87.356	85.057	93.678	85.057	83.908	93.678	98.851	90.23	64.368	94.828
KJ425496 ck/CH/LHB/130573 China	83.908	97.701	98.276	93.678	94.828	90.23	86.207	88.506	86.782	85.632	86.207	86.207	86.782	87.931	86.782	85.632	85.632	86.207	85.632	85.632	100	100	85.632	100	86.782	85.632	86.782	89.08	86.782	89.08	82.759	87.356	87.356	87.356	97.701	97.701	97.701	97.701	94.828	88.506	98.276	85.632	97.126	97.126	86.207	86.782	86.782	74.138	86.207
KP343691 ck/CH/LGX/130530 China	83.908	97.701	98.276	93.678	94.828	90.23	86.207	88.506	86.782	85.632	86.207	86.207	86.782	87.931	86.782	85.632	85.632	86.207	85.632	85.632	100	100	85.632	100	86.782	85.632	86.782	89.08	86.782	89.08	82.759	87.356	87.356	87.356	97.701	97.701	97.701	97.701	94.828	88.506	98.276	85.632	97.126	97.126	86.207	86.782	86.782	74.138	86.207
KT736032 ck/CHLDL150434-II/16 China	83.908	97.701	98.276	93.678	94.828	90.23	86.207	88.506	86.782	85.632	86.207	86.207	86.782	87.931	86.782	85.632	85.632	86.207	85.632	85.632	100	100	85.632	100	86.782	85.632	86.782	89.08	86.782	89.08	82.759	87.356	87.356	87.356	97.701	97.701	97.701	97.701	94.828	88.506	98.276	85.632	97.126	97.126	86.207	86.782	86.782	74.138	86.207
KU356856 ck/CH/SCYB/140913/25 China	84.483	97.126	97.701	93.103	94.253	89.655	85.632	87.931	86.207	85.057	85.632	85.632	86.207	87.356	86.207	85.057	85.057	85.632	85.057	85.057	99.425	99.425	85.057	99.425	86.207	85.057	86.207	88.506	86.207	88.506	82.184	86.782	86.782	86.782	97.126	97.126	97.126	97.126	94.253	87.931	97.701	85.057	96.552	96.552	85.632	86.207	86.207	73.563	85.632
MT505388 CK/CH/SCMY/160315/20 China	83.333	97.126	97.701	93.103	94.253	89.655	85.632	87.931	86.207	85.632	85.632	85.632	86.207	87.356	86.207	85.057	85.057	85.632	85.057	85.057	99.425	99.425	85.632	99.425	86.207	85.057	86.207	88.506	86.207	88.506	83.333	86.782	86.782	86.782	97.126	97.126	97.126	97.126	94.253	87.931	97.701	85.057	96.552	96.552	85.632	86.207	86.207	73.563	85.632
KJ425497 ck/CH/LHB/130598/14 China	83.333	81.609	81.034	81.034	81.034	83.908	82.184	80.46	82.759	81.609	82.184	82.184	82.759	83.908	82.759	81.609	81.609	82.184	81.609	81.609	82.759	82.759	81.609	82.759	82.759	81.609	82.759	80.46	81.034	80.46	77.586	85.057	85.057	85.057	81.034	81.034	81.034	81.034	81.034	85.057	81.034	84.483	81.609	80.46	83.908	84.483	83.333	60.345	84.483
FN430415 NGA/A116E7/06 Nigeria	85.632	83.333	82.759	82.759	80.46	86.207	83.333	83.333	83.908	82.759	83.333	83.333	83.908	83.908	83.908	82.759	82.759	83.333	82.759	82.759	83.333	83.333	82.759	83.333	83.908	82.759	83.908	82.184	80.46	83.333	79.885	87.931	87.931	87.931	81.609	81.609	81.609	81.609	82.759	85.632	82.184	86.782	82.184	82.759	86.782	87.356	87.356	63.218	86.782
KR231009 B1648/84 Belgium	93.678	86.782	86.782	86.207	85.057	89.655	84.483	87.356	85.057	83.908	84.483	84.483	85.057	86.207	85.057	83.908	83.908	84.483	83.908	83.908	87.931	87.931	83.908	87.931	85.057	83.908	85.057	87.356	88.506	87.356	85.632	98.851	98.851	98.851	85.632	85.632	85.632	85.632	87.356	87.931	86.207	95.402	86.207	85.057	95.402	98.276	90.805	65.517	96.552
MN548285 CR88 (4/91)/88 France	91.954	85.632	85.632	84.483	84.483	87.931	83.908	85.632	84.483	83.333	83.908	83.908	84.483	85.632	84.483	84.483	84.483	83.908	84.483	84.483	86.207	86.207	83.333	86.207	84.483	84.483	84.483	85.632	86.207	85.632	85.632	96.552	96.552	96.552	83.908	83.908	83.908	83.908	85.057	86.782	84.483	91.954	84.483	83.333	92.529	95.977	89.655	63.218	93.103
MN548288 Italy02/02 Italy	83.908	83.908	83.908	86.207	83.333	87.356	82.184	83.908	82.759	81.609	82.184	82.184	82.759	83.908	82.759	81.609	81.609	82.184	81.609	81.609	85.632	85.632	81.609	85.632	82.759	81.609	82.759	84.483	82.759	84.483	78.736	85.057	85.057	85.057	83.908	83.908	83.908	83.908	83.333	85.632	84.483	85.632	83.333	84.483	85.632	84.483	93.103	64.368	85.632
MG021194 gCoV/Ck/IT/624I/96 Italy	87.931	86.207	85.632	85.632	84.483	90.23	83.333	85.057	83.908	82.759	83.333	83.333	83.908	85.057	83.908	82.759	82.759	83.333	82.759	82.759	87.356	87.356	82.759	87.356	83.908	82.759	83.908	85.057	85.632	85.057	83.333	91.954	91.954	91.954	85.057	85.057	85.057	85.057	85.632	86.782	85.632	90.23	85.632	85.632	90.23	91.379	86.207	64.368	90.23
KU900739 QIA-03342/03 Korea	87.356	86.782	86.782	87.931	84.483	83.908	79.885	82.184	80.46	79.31	79.885	79.885	80.46	81.609	80.46	79.31	79.31	79.885	79.31	79.31	88.506	88.506	79.31	88.506	80.46	79.31	80.46	82.184	94.253	82.184	81.034	90.805	90.805	90.805	86.207	86.207	86.207	86.207	86.782	85.057	86.782	89.08	86.782	85.632	89.08	90.23	87.356	65.517	90.23
KU900744 QIA-Q43/06 Korea	87.356	86.782	86.782	87.931	84.483	83.908	79.885	82.184	80.46	79.31	79.885	79.885	80.46	81.609	80.46	79.31	79.31	79.885	79.31	79.31	88.506	88.506	79.31	88.506	80.46	79.31	80.46	82.184	94.253	82.184	81.034	90.805	90.805	90.805	86.207	86.207	86.207	86.207	86.782	85.057	86.782	89.08	86.782	85.632	89.08	90.23	87.356	65.517	90.23
KJ425504 ck/CH/LHJL/091205 China	85.632	85.057	84.483	83.333	83.333	85.632	82.759	82.184	83.333	82.184	82.759	82.759	83.333	84.483	83.333	82.184	82.184	82.759	82.184	82.184	85.057	85.057	82.184	85.057	83.333	82.184	83.333	82.184	82.184	82.184	80.46	88.506	88.506	88.506	82.759	82.759	82.759	82.759	85.057	87.356	83.333	87.356	83.333	82.184	86.782	87.931	85.632	63.793	87.356
MH539771 IBV/SES/15AB-01 Canada	85.632	85.057	84.483	83.333	83.333	85.632	82.759	82.184	83.333	82.184	82.759	82.759	83.333	84.483	83.333	82.184	82.184	82.759	82.184	82.184	85.057	85.057	82.184	85.057	83.333	82.184	83.333	82.184	82.184	82.184	80.46	88.506	88.506	88.506	82.759	82.759	82.759	82.759	85.057	87.356	83.333	87.356	83.333	82.184	86.782	87.931	85.632	63.793	87.356
MH539772 IBV/SES/15SK-02 Canada	85.632	85.057	84.483	83.333	83.333	85.632	82.759	82.184	83.333	82.184	82.759	82.759	83.333	84.483	83.333	82.184	82.184	82.759	82.184	82.184	85.057	85.057	82.184	85.057	83.333	82.184	83.333	82.184	82.184	82.184	80.46	88.506	88.506	88.506	82.759	82.759	82.759	82.759	85.057	87.356	83.333	87.356	83.333	82.184	86.782	87.931	85.632	63.793	87.356
MK937830 M41/19 China	85.632	85.057	84.483	83.333	83.333	85.632	82.759	82.184	83.333	82.184	82.759	82.759	83.333	84.483	83.333	82.184	82.184	82.759	82.184	82.184	85.057	85.057	82.184	85.057	83.333	82.184	83.333	82.184	82.184	82.184	80.46	88.506	88.506	88.506	82.759	82.759	82.759	82.759	85.057	87.356	83.333	87.356	83.333	82.184	86.782	87.931	85.632	63.793	87.356
MW446887 IBV/M41/Y192 China	85.632	85.057	84.483	83.333	83.333	85.632	82.759	82.184	83.333	82.184	82.759	82.759	83.333	84.483	83.333	82.184	82.184	82.759	82.184	82.184	85.057	85.057	82.184	85.057	83.333	82.184	83.333	82.184	82.184	82.184	80.46	88.506	88.506	88.506	82.759	82.759	82.759	82.759	85.057	87.356	83.333	87.356	83.333	82.184	86.782	87.931	85.632	63.793	87.356
MW429061 IBV/M41/Y28 China	85.632	85.057	84.483	83.333	83.333	85.632	82.759	82.184	83.333	82.184	82.759	82.759	83.333	84.483	83.333	82.184	82.184	82.759	82.184	82.184	85.057	85.057	82.184	85.057	83.333	82.184	83.333	82.184	82.184	82.184	80.46	88.506	88.506	88.506	82.759	82.759	82.759	82.759	85.057	87.356	83.333	87.356	83.333	82.184	86.782	87.931	85.632	63.793	87.356
MW446888 IBV/M41/Y27 China	85.632	85.057	84.483	83.333	83.333	85.632	82.759	82.184	83.333	82.184	82.759	82.759	83.333	84.483	83.333	82.184	82.184	82.759	82.184	82.184	85.057	85.057	82.184	85.057	83.333	82.184	83.333	82.184	82.184	82.184	80.46	88.506	88.506	88.506	82.759	82.759	82.759	82.759	85.057	87.356	83.333	87.356	83.333	82.184	86.782	87.931	85.632	63.793	87.356
MW429062 IBV/M41/N56 China	85.632	85.057	84.483	83.333	83.333	85.632	82.759	82.184	83.333	82.184	82.759	82.759	83.333	84.483	83.333	82.184	82.184	82.759	82.184	82.184	85.057	85.057	82.184	85.057	83.333	82.184	83.333	82.184	82.184	82.184	80.46	88.506	88.506	88.506	82.759	82.759	82.759	82.759	85.057	87.356	83.333	87.356	83.333	82.184	86.782	87.931	85.632	63.793	87.356
MK728875 M41-CK/17 UK	85.632	85.057	84.483	83.333	83.333	85.632	82.759	82.184	83.333	82.184	82.759	82.759	83.333	84.483	83.333	82.184	82.184	82.759	82.184	82.184	85.057	85.057	82.184	85.057	83.333	82.184	83.333	82.184	82.184	82.184	80.46	88.506	88.506	88.506	82.759	82.759	82.759	82.759	85.057	87.356	83.333	87.356	83.333	82.184	86.782	87.931	85.632	63.793	87.356
KJ435286 ck/CH/LSD/1112150 China	85.632	85.057	84.483	83.333	83.333	85.632	82.759	82.184	83.333	82.184	82.759	82.759	83.333	84.483	83.333	82.184	82.184	82.759	82.184	82.184	85.057	85.057	82.184	85.057	83.333	82.184	83.333	82.184	82.184	82.184	80.46	88.506	88.506	88.506	82.759	82.759	82.759	82.759	85.057	87.356	83.333	87.356	83.333	82.184	86.782	87.931	85.632	63.793	87.356
KY047602 gCoV/Ck/Pol/G052/16 Poland	86.782	86.207	86.207	85.057	85.057	86.782	82.759	83.908	83.333	82.184	82.759	82.759	83.333	84.483	83.333	82.184	82.184	82.759	82.184	82.184	86.782	86.782	82.184	86.782	83.333	82.184	83.333	83.908	83.333	83.908	83.333	90.805	90.805	90.805	84.483	84.483	84.483	84.483	87.931	87.356	85.057	88.506	85.057	83.908	88.506	90.23	89.655	63.793	88.506
MK581207 gCoV/Ck/Pol/G103/16 Poland	86.782	86.207	86.207	85.057	85.057	86.782	82.759	83.908	83.333	82.184	82.759	82.759	83.333	84.483	83.333	82.184	82.184	82.759	82.184	82.184	86.782	86.782	82.184	86.782	83.333	82.184	83.333	83.908	83.333	83.908	83.333	90.805	90.805	90.805	84.483	84.483	84.483	84.483	87.931	87.356	85.057	88.506	85.057	83.908	88.506	90.23	89.655	63.793	88.506
MK581208 gCoV/Ck/Pol/G225/17 Poland	86.782	86.207	86.207	85.057	85.057	86.782	82.759	83.908	83.333	82.184	82.759	82.759	83.333	84.483	83.333	82.184	82.184	82.759	82.184	82.184	86.782	86.782	82.184	86.782	83.333	82.184	83.333	83.908	83.333	83.908	83.333	90.805	90.805	90.805	84.483	84.483	84.483	84.483	87.931	87.356	85.057	88.506	85.057	83.908	88.506	90.23	89.655	63.793	88.506
MK581202 gCoV/Ck/Pol/80/89 Poland	87.356	86.782	87.356	86.207	86.207	87.356	83.333	84.483	83.908	82.759	83.333	83.333	83.908	85.057	83.908	82.759	82.759	83.333	82.759	82.759	87.931	87.931	82.759	87.931	83.908	82.759	83.908	84.483	86.207	84.483	82.184	90.23	90.23	90.23	85.632	85.632	85.632	85.632	86.782	87.931	86.207	87.356	85.057	85.057	87.931	89.655	90.805	63.793	87.931
MK581203 gCoV/Ck/Pol/162/97 Poland	90.23	87.356	87.356	85.632	84.483	87.931	82.759	86.207	83.333	82.184	82.759	82.759	83.333	84.483	83.333	82.184	82.184	82.759	82.184	82.184	88.506	88.506	82.184	88.506	83.333	82.184	83.333	86.207	89.08	86.207	82.759	92.529	92.529	92.529	86.207	86.207	86.207	86.207	87.931	92.529	86.782	90.805	86.782	85.632	90.805	91.954	91.379	66.092	91.954
MK581204 gCoV/Ck/Pol/255/97 Poland	92.529	86.782	87.356	85.632	84.483	89.08	83.908	86.207	84.483	83.333	83.908	83.908	84.483	85.632	84.483	83.333	83.333	83.908	83.333	83.333	87.356	87.356	83.333	87.356	84.483	83.333	84.483	86.207	87.356	86.207	85.057	97.701	97.701	97.701	85.057	85.057	85.057	85.057	86.207	87.931	85.632	93.103	85.632	84.483	93.678	97.126	90.805	65.517	94.253
MT591566 CK/DE/IB80/16 Germany	93.678	85.057	83.908	85.057	83.333	86.782	81.034	83.908	81.609	80.46	81.034	81.034	81.609	82.759	81.609	80.46	80.46	81.034	80.46	80.46	85.057	85.057	80.46	85.057	81.609	80.46	81.609	83.908	86.207	83.908	82.759	94.253	94.253	94.253	83.333	83.333	83.333	83.333	85.057	85.057	83.908	97.701	83.908	82.759	96.552	93.678	90.23	64.368	97.701
MN987231 IBV/ck/EGY-Monuf/USC-3/13 Egypt	92.529	85.632	84.483	86.782	83.908	87.356	82.759	84.483	82.184	81.034	81.609	81.609	82.184	83.333	82.184	81.034	81.034	81.609	81.034	81.034	85.632	85.632	81.034	85.632	82.184	81.034	82.184	84.483	87.931	84.483	83.333	95.402	95.402	95.402	83.908	83.908	83.908	83.908	85.632	86.782	84.483	95.402	84.483	83.333	94.253	94.828	89.655	64.943	95.402
KR608272 LDT3-A/03 China	83.908	97.701	98.276	93.678	94.828	90.23	86.207	88.506	86.782	85.632	86.207	86.207	86.782	87.931	86.782	85.632	85.632	86.207	85.632	85.632	100	100	85.632	100	86.782	85.632	86.782	89.08	86.782	89.08	82.759	87.356	87.356	87.356	97.701	97.701	97.701	97.701	94.828	88.506	98.276	85.632	97.126	97.126	86.207	86.782	86.782	74.138	86.207
MK574042 ck/CH/LHB/110615/19 China	82.184	82.759	82.759	82.184	82.184	86.207	82.184	83.908	82.184	81.609	81.609	81.609	82.184	83.333	82.184	82.184	82.184	81.609	82.184	82.184	82.184	82.184	81.609	82.184	82.184	82.184	82.184	85.057	78.736	84.483	99.425	85.057	85.057	85.057	79.885	79.885	79.885	79.885	81.034	81.609	80.46	82.759	80.46	79.31	84.483	84.483	80.46	62.644	83.333
MK574043 ck/CH/LHB/110627/19 China	82.184	82.759	82.759	82.184	82.184	86.207	82.184	83.908	82.184	81.609	81.609	81.609	82.184	83.333	82.184	82.184	82.184	81.609	82.184	82.184	82.184	82.184	81.609	82.184	82.184	82.184	82.184	85.057	78.736	84.483	99.425	85.057	85.057	85.057	79.885	79.885	79.885	79.885	81.034	81.609	80.46	82.759	80.46	79.31	84.483	84.483	80.46	62.644	83.333
MN548286 D1466/84 UK	85.057	82.759	82.759	81.609	81.609	84.483	79.31	81.609	79.885	78.736	79.31	79.31	79.885	81.034	79.885	78.736	78.736	79.31	78.736	78.736	83.333	83.333	78.736	83.333	79.885	78.736	79.885	82.184	81.609	82.184	81.609	87.931	87.931	87.931	81.034	81.034	81.034	81.034	82.184	85.057	81.609	85.632	81.609	80.46	86.207	87.356	87.931	62.069	86.207
[truncated: 52 more columns]

## Sheet: 3b
Table S1e. Nucleotide identities between sequences in the QX dataset (n=101). Gene 3b.
	KR822424 TCoV/080385d/08 France	OM525802 D532/9/CH/05	KX219797 ck/CH/LXJ/02I/16 China	KX252772 ck/CH/LSHH/03II/16 China	KX252778 ck/CH/LJL/05I/16 China	HQ848267 GX-YL5/05 China	KF411041 CK/CH/LGX/091109/13 China	KP118886 ck/CH/LSD/111235/14 China	KX185058 ck/CH/LGS/08I/16 China	KX219791 ck/CH/LHLJ/07I/16 China	KX219792 ck/CH/LGS/06I/16 China	KX375805 ck/CH/LJS/07V/16 China	KX252789 ck/CH/LHLJ/090605/16 China	KX252777 ck/CH/LSD/07I/16 China	KX364293 ck/CH/LJL/07III/16 China	KX219794 ck/CH/LJS/101109/16 China	KX236009 ck/CH/LSX/130132/16 China	KX259250 ck/CH/LJS/101113/16 China	KX302862 ck/CH/LJS/101111/16 China	KX364299 ck/CH/LSD/101223/16 China	KX236007 ck/CH/LSD/100408/16 China	KX219801 ck/CH/LSD/120437/16 China	MK032181 gCoV/ck/Chi/I0347/11 China	KX275391 ck/CH/LHLJ/140927/16 China	KX219800 ck/CH/LSD/130611/16 China	KX252787 ck/CH/LLN/131040/16/ China	KX252785 ck/CH/LSD/100311/16 China	KY407556 gCoV/ck/Chi/I0114/14 China	MK618759 K047-12/12 Korea	HM245924 CQ04-1/04 China	KX252779 ck/CH/LLN/06I/16 China	MK032177 gCoV/ck/Chi/I0724/17 China	MK032179 gCoV/ck/Chi/I0922/17 China	MK032180 gCoV/ck/China/I0737/17 China	OM525803 D535/4/FR/05	KY933089 1148-A/field/17 UK	MN548289 QX UK	KY933090 L1148/vaccine/17 UK	MK581205 gCoV/Ck/Pol/548/04 Poland	OM525806 D722/SK/06	OM525804 D591/2/GR/05	KX272465 AR251-15/14 Sudan	FN430414 ITA/90254/05 Italy	JQ088078 CK/SWE/065/8946/10 Sweden	KT886454 gCoV/Ck/Pol/74/09 Poland	MK581206 gCoV/Ck/Pol/195/12 Poland	OM525805 D683/HU/06	KX236001 ck/CH/LSD/03I/16 China	KP662631 ck/ZA/3665/11 South Africa
KR822424 TCoV/080385d/08 France		72.308	71.282	74.479	72.821	68.444	72.396	75.521	72.917	72.917	72.917	72.917	72.917	72.396	72.917	72.917	72.396	72.396	72.396	76.042	74.872	67.708	72.396	77.436	72.917	72.396	72.917	79.487	73.438	80	78.462	88.718	88.205	88.718	75.385	75.385	75.385	75.385	81.538	73.333	74.872	79.487	75.385	75.385	79.487	88.462	86.154	75.385	79.487
OM525802 D532/9/CH/05	72.308		95.313	87.302	89.583	64.414	89.418	87.831	89.947	89.947	89.947	89.947	91.005	89.418	89.947	89.418	89.418	89.418	89.418	86.243	89.063	80.952	90.476	90.625	89.947	89.418	89.947	76.563	89.418	76.042	73.958	71.795	71.795	71.795	92.708	92.188	92.188	92.188	78.974	92.188	92.188	88.021	92.708	91.146	90.104	70.513	76.923	92.188	90.104
KX219797 ck/CH/LXJ/02I/16 China	71.282	95.313		86.772	93.229	64.414	88.889	87.302	89.418	89.418	89.418	89.418	90.476	88.889	89.418	88.889	88.889	88.889	88.889	84.656	89.583	79.365	89.947	91.146	89.418	88.889	89.418	76.563	88.889	76.042	75	71.282	71.282	71.282	89.063	89.583	89.583	89.583	80	88.542	89.063	86.458	89.063	88.542	86.458	71.026	76.923	89.583	86.458
KX252772 ck/CH/LSHH/03II/16 China	74.479	87.302	86.772		91.005	64.84	92.063	94.709	92.593	92.593	92.593	92.593	92.593	92.593	92.593	92.063	92.063	92.063	92.063	93.122	91.005	85.185	92.063	92.063	92.593	92.063	92.593	77.249	92.063	76.72	74.603	71.354	71.354	71.354	89.418	89.947	89.947	89.947	76.563	86.243	89.418	88.36	89.418	88.889	87.831	70.052	77.604	89.947	87.831
KX252778 ck/CH/LJL/05I/16 China	72.821	89.583	93.229	91.005		63.964	86.772	88.889	87.302	87.302	87.302	87.302	87.302	87.302	87.302	86.772	86.772	86.772	86.772	86.772	91.146	80.952	86.772	92.708	87.302	86.772	87.302	76.042	86.772	75.521	73.438	71.282	71.282	71.282	90.104	90.625	90.625	90.625	77.436	86.979	90.104	89.063	90.104	89.583	88.542	71.026	75.897	90.625	88.542
HQ848267 GX-YL5/05 China	68.444	64.414	64.414	64.84	63.964		65.753	67.58	66.21	66.21	66.21	66.21	66.21	65.753	66.21	65.753	66.21	66.21	66.21	63.47	68.468	64.815	65.753	68.468	66.21	66.21	66.21	80.822	66.667	81.735	73.059	67.111	66.667	67.111	69.369	69.369	69.369	69.369	71.111	65.315	68.468	67.117	69.369	68.919	67.117	66	70.222	68.468	67.117
KF411041 CK/CH/LGX/091109/13 China	72.396	89.418	88.889	92.063	86.772	65.753		95.238	99.471	99.471	99.471	99.471	98.413	98.413	99.471	98.942	98.942	98.942	98.942	91.534	91.534	85.714	97.884	92.593	99.471	98.942	99.471	76.72	98.942	77.249	76.72	71.875	71.875	71.875	91.534	92.063	92.063	92.063	79.167	88.889	91.534	86.772	91.534	91.005	86.772	70.573	78.646	92.063	86.772
KP118886 ck/CH/LSD/111235/14 China	75.521	87.831	87.302	94.709	88.889	67.58	95.238		95.767	95.767	95.767	95.767	94.709	95.238	95.767	95.238	95.238	95.238	95.238	93.122	95.238	89.418	94.18	96.296	95.767	95.238	95.767	80.423	95.238	79.894	75.661	72.917	72.917	72.917	92.063	92.593	92.593	92.593	79.688	87.831	92.063	89.947	92.063	91.534	89.947	71.615	80.208	92.593	89.947
KX185058 ck/CH/LGS/08I/16 China	72.917	89.947	89.418	92.593	87.302	66.21	99.471	95.767		100	100	100	98.942	98.942	100	99.471	99.471	99.471	99.471	92.063	92.063	86.243	98.413	93.122	100	99.471	100	77.249	99.471	77.778	77.249	72.396	72.396	72.396	92.063	92.593	92.593	92.593	79.688	89.418	92.063	87.302	92.063	91.534	87.302	71.094	79.167	92.593	87.302
KX219791 ck/CH/LHLJ/07I/16 China	72.917	89.947	89.418	92.593	87.302	66.21	99.471	95.767	100		100	100	98.942	98.942	100	99.471	99.471	99.471	99.471	92.063	92.063	86.243	98.413	93.122	100	99.471	100	77.249	99.471	77.778	77.249	72.396	72.396	72.396	92.063	92.593	92.593	92.593	79.688	89.418	92.063	87.302	92.063	91.534	87.302	71.094	79.167	92.593	87.302
KX219792 ck/CH/LGS/06I/16 China	72.917	89.947	89.418	92.593	87.302	66.21	99.471	95.767	100	100		100	98.942	98.942	100	99.471	99.471	99.471	99.471	92.063	92.063	86.243	98.413	93.122	100	99.471	100	77.249	99.471	77.778	77.249	72.396	72.396	72.396	92.063	92.593	92.593	92.593	79.688	89.418	92.063	87.302	92.063	91.534	87.302	71.094	79.167	92.593	87.302
KX375805 ck/CH/LJS/07V/16 China	72.917	89.947	89.418	92.593	87.302	66.21	99.471	95.767	100	100	100		98.942	98.942	100	99.471	99.471	99.471	99.471	92.063	92.063	86.243	98.413	93.122	100	99.471	100	77.249	99.471	77.778	77.249	72.396	72.396	72.396	92.063	92.593	92.593	92.593	79.688	89.418	92.063	87.302	92.063	91.534	87.302	71.094	79.167	92.593	87.302
KX252789 ck/CH/LHLJ/090605/16 China	72.917	91.005	90.476	92.593	87.302	66.21	98.413	94.709	98.942	98.942	98.942	98.942		97.884	98.942	98.413	98.413	98.413	98.413	91.005	91.005	85.185	99.471	92.063	98.942	98.413	98.942	77.249	98.413	77.778	77.249	72.396	72.396	72.396	92.063	92.593	92.593	92.593	78.646	89.418	92.063	87.302	92.063	91.534	87.302	71.094	79.167	92.593	87.302
KX252777 ck/CH/LSD/07I/16 China	72.396	89.418	88.889	92.593	87.302	65.753	98.413	95.238	98.942	98.942	98.942	98.942	97.884		98.942	98.413	98.413	98.413	98.413	91.534	91.534	85.714	97.354	92.593	98.942	98.413	98.942	76.72	98.413	77.249	76.19	71.875	71.875	71.875	91.005	91.534	91.534	91.534	79.167	88.36	91.005	86.772	91.005	90.476	86.772	70.573	78.646	91.534	86.772
KX364293 ck/CH/LJL/07III/16 China	72.917	89.947	89.418	92.593	87.302	66.21	99.471	95.767	100	100	100	100	98.942	98.942		99.471	99.471	99.471	99.471	92.063	92.063	86.243	98.413	93.122	100	99.471	100	77.249	99.471	77.778	77.249	72.396	72.396	72.396	92.063	92.593	92.593	92.593	79.688	89.418	92.063	87.302	92.063	91.534	87.302	71.094	79.167	92.593	87.302
KX219794 ck/CH/LJS/101109/16 China	72.917	89.418	88.889	92.063	86.772	65.753	98.942	95.238	99.471	99.471	99.471	99.471	98.413	98.413	99.471		98.942	98.942	98.942	91.534	91.534	85.714	97.884	92.593	99.471	98.942	99.471	76.72	98.942	77.249	77.249	72.396	72.396	72.396	91.534	92.063	92.063	92.063	80.208	88.889	91.534	86.772	91.534	91.005	86.772	71.094	79.167	92.063	86.772
KX236009 ck/CH/LSX/130132/16 China	72.396	89.418	88.889	92.063	86.772	66.21	98.942	95.238	99.471	99.471	99.471	99.471	98.413	98.413	99.471	98.942		98.942	100	91.534	91.534	85.714	97.884	92.593	99.471	100	99.471	77.249	98.942	77.778	76.72	71.875	71.875	71.875	91.534	92.063	92.063	92.063	79.167	89.947	91.534	86.772	91.534	91.005	86.772	70.573	78.646	92.063	86.772
KX259250 ck/CH/LJS/101113/16 China	72.396	89.418	88.889	92.063	86.772	66.21	98.942	95.238	99.471	99.471	99.471	99.471	98.413	98.413	99.471	98.942	98.942		98.942	91.534	91.534	86.243	97.884	92.593	99.471	98.942	99.471	77.249	98.942	77.778	77.249	71.875	71.875	71.875	91.534	92.063	92.063	92.063	79.167	88.889	91.534	86.772	91.534	91.005	86.772	70.573	78.646	92.063	86.772
KX302862 ck/CH/LJS/101111/16 China	72.396	89.418	88.889	92.063	86.772	66.21	98.942	95.238	99.471	99.471	99.471	99.471	98.413	98.413	99.471	98.942	100	98.942		91.534	91.534	85.714	97.884	92.593	99.471	100	99.471	77.249	98.942	77.778	76.72	71.875	71.875	71.875	91.534	92.063	92.063	92.063	79.167	89.947	91.534	86.772	91.534	91.005	86.772	70.573	78.646	92.063	86.772
KX364299 ck/CH/LSD/101223/16 China	76.042	86.243	84.656	93.122	86.772	63.47	91.534	93.122	92.063	92.063	92.063	92.063	91.005	91.534	92.063	91.534	91.534	91.534	91.534		89.418	83.598	91.534	90.476	92.063	91.534	92.063	74.603	91.534	74.074	74.074	75	75	75	86.243	86.772	86.772	86.772	77.604	85.714	86.243	89.947	86.243	85.714	89.418	73.698	81.771	86.772	89.418
KX236007 ck/CH/LSD/100408/16 China	74.872	89.063	89.583	91.005	91.146	68.468	91.534	95.238	92.063	92.063	92.063	92.063	91.005	91.534	92.063	91.534	91.534	91.534	91.534	89.418		89.785	90.476	97.396	92.063	91.534	92.063	81.25	91.534	80.729	77.083	73.846	73.846	73.846	93.229	93.75	93.75	93.75	81.538	89.583	93.229	91.146	93.229	92.708	91.146	72.564	80	93.75	91.146
KX219801 ck/CH/LSD/120437/16 China	67.708	80.952	79.365	85.185	80.952	64.815	85.714	89.418	86.243	86.243	86.243	86.243	85.185	85.714	86.243	85.714	85.714	86.243	85.714	83.598	89.785		84.656	88.36	86.243	85.714	86.243	77.419	85.714	76.882	72.043	65.625	65.625	65.625	85.185	85.185	85.185	85.185	72.396	81.481	85.185	83.069	85.185	84.656	83.069	64.323	72.396	85.185	83.069
MK032181 gCoV/ck/Chi/I0347/11 China	72.396	90.476	89.947	92.063	86.772	65.753	97.884	94.18	98.413	98.413	98.413	98.413	99.471	97.354	98.413	97.884	97.884	97.884	97.884	91.534	90.476	84.656		91.534	98.413	97.884	98.413	76.72	97.884	77.249	76.72	71.875	71.875	71.875	91.534	92.063	92.063	92.063	78.125	88.889	91.534	86.772	91.534	91.005	86.772	70.573	78.646	92.063	86.772
KX275391 ck/CH/LHLJ/140927/16 China	77.436	90.625	91.146	92.063	92.708	68.468	92.593	96.296	93.122	93.122	93.122	93.122	92.063	92.593	93.122	92.593	92.593	92.593	92.593	90.476	97.396	88.36	91.534		93.122	92.593	93.122	81.25	92.593	80.729	77.083	74.872	74.872	74.872	94.792	95.313	95.313	95.313	81.538	90.625	94.792	92.708	94.792	94.271	92.708	74.615	81.538	95.313	92.708
KX219800 ck/CH/LSD/130611/16 China	72.917	89.947	89.418	92.593	87.302	66.21	99.471	95.767	100	100	100	100	98.942	98.942	100	99.471	99.471	99.471	99.471	92.063	92.063	86.243	98.413	93.122		99.471	100	77.249	99.471	77.778	77.249	72.396	72.396	72.396	92.063	92.593	92.593	92.593	79.688	89.418	92.063	87.302	92.063	91.534	87.302	71.094	79.167	92.593	87.302
KX252787 ck/CH/LLN/131040/16/ China	72.396	89.418	88.889	92.063	86.772	66.21	98.942	95.238	99.471	99.471	99.471	99.471	98.413	98.413	99.471	98.942	100	98.942	100	91.534	91.534	85.714	97.884	92.593	99.471		99.471	77.249	98.942	77.778	76.72	71.875	71.875	71.875	91.534	92.063	92.063	92.063	79.167	89.947	91.534	86.772	91.534	91.005	86.772	70.573	78.646	92.063	86.772
KX252785 ck/CH/LSD/100311/16 China	72.917	89.947	89.418	92.593	87.302	66.21	99.471	95.767	100	100	100	100	98.942	98.942	100	99.471	99.471	99.471	99.471	92.063	92.063	86.243	98.413	93.122	100	99.471		77.249	99.471	77.778	77.249	72.396	72.396	72.396	92.063	92.593	92.593	92.593	79.688	89.418	92.063	87.302	92.063	91.534	87.302	71.094	79.167	92.593	87.302
KY407556 gCoV/ck/Chi/I0114/14 China	79.487	76.563	76.563	77.249	76.042	80.822	76.72	80.423	77.249	77.249	77.249	77.249	77.249	76.72	77.249	76.72	77.249	77.249	77.249	74.603	81.25	77.419	76.72	81.25	77.249	77.249	77.249		77.778	98.413	87.302	78.462	77.949	78.462	80.729	80.729	80.729	80.729	84.103	77.083	79.688	78.646	80.729	80.208	78.646	77.179	82.051	80.729	78.646
MK618759 K047-12/12 Korea	73.438	89.418	88.889	92.063	86.772	66.667	98.942	95.238	99.471	99.471	99.471	99.471	98.413	98.413	99.471	98.942	98.942	98.942	98.942	91.534	91.534	85.714	97.884	92.593	99.471	98.942	99.471	77.778		78.307	77.778	72.917	72.917	72.917	91.534	92.063	92.063	92.063	79.167	88.889	91.534	86.772	91.534	91.005	86.772	71.615	78.646	92.063	86.772
HM245924 CQ04-1/04 China	80	76.042	76.042	76.72	75.521	81.735	77.249	79.894	77.778	77.778	77.778	77.778	77.778	77.249	77.778	77.249	77.778	77.778	77.778	74.074	80.729	76.882	77.249	80.729	77.778	77.778	77.778	98.413	78.307		86.243	78.462	77.949	78.462	81.25	81.25	81.25	81.25	84.615	77.083	80.208	78.125	81.25	80.729	78.125	77.179	82.564	81.25	78.125
KX252779 ck/CH/LLN/06I/16 China	78.462	73.958	75	74.603	73.438	73.059	76.72	75.661	77.249	77.249	77.249	77.249	77.249	76.19	77.249	77.249	76.72	77.249	76.72	74.074	77.083	72.043	76.72	77.083	77.249	76.72	77.249	87.302	77.778	86.243		80	79.487	80	75.521	75.521	75.521	75.521	84.615	76.042	75.521	73.438	75.521	76.042	73.438	78.718	84.103	76.042	73.438
MK032177 gCoV/ck/Chi/I0724/17 China	88.718	71.795	71.282	71.354	71.282	67.111	71.875	72.917	72.396	72.396	72.396	72.396	72.396	71.875	72.396	72.396	71.875	71.875	71.875	75	73.846	65.625	71.875	74.872	72.396	71.875	72.396	78.462	72.917	78.462	80		99.487	100	74.359	74.359	74.359	74.359	84.103	74.872	73.333	78.974	74.359	73.333	78.974	98.718	87.179	73.846	78.974
MK032179 gCoV/ck/Chi/I0922/17 China	88.205	71.795	71.282	71.354	71.282	66.667	71.875	72.917	72.396	72.396	72.396	72.396	72.396	71.875	72.396	72.396	71.875	71.875	71.875	75	73.846	65.625	71.875	74.872	72.396	71.875	72.396	77.949	72.917	77.949	79.487	99.487		99.487	74.359	74.359	74.359	74.359	83.59	74.872	73.333	78.974	74.359	73.333	78.974	98.205	86.667	73.846	78.974
MK032180 gCoV/ck/China/I0737/17 China	88.718	71.795	71.282	71.354	71.282	67.111	71.875	72.917	72.396	72.396	72.396	72.396	72.396	71.875	72.396	72.396	71.875	71.875	71.875	75	73.846	65.625	71.875	74.872	72.396	71.875	72.396	78.462	72.917	78.462	80	100	99.487		74.359	74.359	74.359	74.359	84.103	74.872	73.333	78.974	74.359	73.333	78.974	98.718	87.179	73.846	78.974
OM525803 D535/4/FR/05	75.385	92.708	89.063	89.418	90.104	69.369	91.534	92.063	92.063	92.063	92.063	92.063	92.063	91.005	92.063	91.534	91.534	91.534	91.534	86.243	93.229	85.185	91.534	94.792	92.063	91.534	92.063	80.729	91.534	81.25	75.521	74.359	74.359	74.359		99.479	99.479	99.479	78.974	93.75	98.438	92.708	100	97.396	94.792	73.077	77.949	98.438	94.792
KY933089 1148-A/field/17 UK	75.385	92.188	89.583	89.947	90.625	69.369	92.063	92.593	92.593	92.593	92.593	92.593	92.593	91.534	92.593	92.063	92.063	92.063	92.063	86.772	93.75	85.185	92.063	95.313	92.593	92.063	92.593	80.729	92.063	81.25	75.521	74.359	74.359	74.359	99.479		100	100	78.974	93.229	97.917	92.188	99.479	97.917	94.271	73.077	77.949	98.958	94.271
MN548289 QX UK	75.385	92.188	89.583	89.947	90.625	69.369	92.063	92.593	92.593	92.593	92.593	92.593	92.593	91.534	92.593	92.063	92.063	92.063	92.063	86.772	93.75	85.185	92.063	95.313	92.593	92.063	92.593	80.729	92.063	81.25	75.521	74.359	74.359	74.359	99.479	100		100	78.974	93.229	97.917	92.188	99.479	97.917	94.271	73.077	77.949	98.958	94.271
KY933090 L1148/vaccine/17 UK	75.385	92.188	89.583	89.947	90.625	69.369	92.063	92.593	92.593	92.593	92.593	92.593	92.593	91.534	92.593	92.063	92.063	92.063	92.063	86.772	93.75	85.185	92.063	95.313	92.593	92.063	92.593	80.729	92.063	81.25	75.521	74.359	74.359	74.359	99.479	100	100		78.974	93.229	97.917	92.188	99.479	97.917	94.271	73.077	77.949	98.958	94.271
MK581205 gCoV/Ck/Pol/548/04 Poland	81.538	78.974	80	76.563	77.436	71.111	79.167	79.688	79.688	79.688	79.688	79.688	78.646	79.167	79.688	80.208	79.167	79.167	79.167	77.604	81.538	72.396	78.125	81.538	79.688	79.167	79.688	84.103	79.167	84.615	84.615	84.103	83.59	84.103	78.974	78.974	78.974	78.974		81.538	78.974	77.436	78.974	77.949	77.436	82.821	92.308	80	77.436
OM525806 D722/SK/06	73.333	92.188	88.542	86.243	86.979	65.315	88.889	87.831	89.418	89.418	89.418	89.418	89.418	88.36	89.418	88.889	89.947	88.889	89.947	85.714	89.583	81.481	88.889	90.625	89.418	89.947	89.418	77.083	88.889	77.083	76.042	74.872	74.872	74.872	93.75	93.229	93.229	93.229	81.538		93.229	89.063	93.75	91.146	91.146	73.59	78.462	93.229	91.146
OM525804 D591/2/GR/05	74.872	92.188	89.063	89.418	90.104	68.468	91.534	92.063	92.063	92.063	92.063	92.063	92.063	91.005	92.063	91.534	91.534	91.534	91.534	86.243	93.229	85.185	91.534	94.792	92.063	91.534	92.063	79.688	91.534	80.208	75.521	73.333	73.333	73.333	98.438	97.917	97.917	97.917	78.974	93.229		91.667	98.438	95.833	93.229	72.051	77.949	97.917	93.229
KX272465 AR251-15/14 Sudan	79.487	88.021	86.458	88.36	89.063	67.117	86.772	89.947	87.302	87.302	87.302	87.302	87.302	86.772	87.302	86.772	86.772	86.772	86.772	89.947	91.146	83.069	86.772	92.708	87.302	86.772	87.302	78.646	86.772	78.125	73.438	78.974	78.974	78.974	92.708	92.188	92.188	92.188	77.436	89.063	91.667		92.708	91.146	97.917	77.692	81.026	91.146	97.917
FN430414 ITA/90254/05 Italy	75.385	92.708	89.063	89.418	90.104	69.369	91.534	92.063	92.063	92.063	92.063	92.063	92.063	91.005	92.063	91.534	91.534	91.534	91.534	86.243	93.229	85.185	91.534	94.792	92.063	91.534	92.063	80.729	91.534	81.25	75.521	74.359	74.359	74.359	100	99.479	99.479	99.479	78.974	93.75	98.438	92.708		97.396	94.792	73.077	77.949	98.438	94.792
JQ088078 CK/SWE/065/8946/10 Sweden	75.385	91.146	88.542	88.889	89.583	68.919	91.005	91.534	91.534	91.534	91.534	91.534	91.534	90.476	91.534	91.005	91.005	91.005	91.005	85.714	92.708	84.656	91.005	94.271	91.534	91.005	91.534	80.208	91.005	80.729	76.042	73.333	73.333	73.333	97.396	97.917	97.917	97.917	77.949	91.146	95.833	91.146	97.396		92.188	72.051	76.923	96.875	92.188
KT886454 gCoV/Ck/Pol/74/09 Poland	79.487	90.104	86.458	87.831	88.542	67.117	86.772	89.947	87.302	87.302	87.302	87.302	87.302	86.772	87.302	86.772	86.772	86.772	86.772	89.418	91.146	83.069	86.772	92.708	87.302	86.772	87.302	78.646	86.772	78.125	73.438	78.974	78.974	78.974	94.792	94.271	94.271	94.271	77.436	91.146	93.229	97.917	94.792	92.188		77.692	81.026	93.229	100
MK581206 gCoV/Ck/Pol/195/12 Poland	88.462	70.513	71.026	70.052	71.026	66	70.573	71.615	71.094	71.094	71.094	71.094	71.094	70.573	71.094	71.094	70.573	70.573	70.573	73.698	72.564	64.323	70.573	74.615	71.094	70.573	71.094	77.179	71.615	77.179	78.718	98.718	98.205	98.718	73.077	73.077	73.077	73.077	82.821	73.59	72.051	77.692	73.077	72.051	77.692		85.897	72.564	77.692
OM525805 D683/HU/06	86.154	76.923	76.923	77.604	75.897	70.222	78.646	80.208	79.167	79.167	79.167	79.167	79.167	78.646	79.167	79.167	78.646	78.646	78.646	81.771	80	72.396	78.646	81.538	79.167	78.646	79.167	82.051	78.646	82.564	84.103	87.179	86.667	87.179	77.949	77.949	77.949	77.949	92.308	78.462	77.949	81.026	77.949	76.923	81.026	85.897		78.974	81.026
KX236001 ck/CH/LSD/03I/16 China	75.385	92.188	89.583	89.947	90.625	68.468	92.063	92.593	92.593	92.593	92.593	92.593	92.593	91.534	92.593	92.063	92.063	92.063	92.063	86.772	93.75	85.185	92.063	95.313	92.593	92.063	92.593	80.729	92.063	81.25	76.042	73.846	73.846	73.846	98.438	98.958	98.958	98.958	80	93.229	97.917	91.146	98.438	96.875	93.229	72.564	78.974		93.229
KP662631 ck/ZA/3665/11 South Africa	79.487	90.104	86.458	87.831	88.542	67.117	86.772	89.947	87.302	87.302	87.302	87.302	87.302	86.772	87.302	86.772	86.772	86.772	86.772	89.418	91.146	83.069	86.772	92.708	87.302	86.772	87.302	78.646	86.772	78.125	73.438	78.974	78.974	78.974	94.792	94.271	94.271	94.271	77.436	91.146	93.229	97.917	94.792	92.188	100	77.692	81.026	93.229
KF377577 4/91 vaccine China	88.718	71.795	71.282	71.354	71.282	67.111	71.875	72.917	72.396	72.396	72.396	72.396	72.396	71.875	72.396	72.396	71.875	71.875	71.875	75	73.846	65.625	71.875	74.872	72.396	71.875	72.396	78.462	72.917	78.462	80	100	99.487	100	74.359	74.359	74.359	74.359	84.103	74.872	73.333	78.974	74.359	73.333	78.974	98.718	87.179	73.846	78.974
KP118881 ck/CH/LBJ/140413/14 China	88.718	71.795	71.282	71.354	71.282	67.111	71.875	72.917	72.396	72.396	72.396	72.396	72.396	71.875	72.396	72.396	71.875	71.875	71.875	75	73.846	65.625	71.875	74.872	72.396	71.875	72.396	78.462	72.917	78.462	80	100	99.487	100	74.359	74.359	74.359	74.359	84.103	74.872	73.333	78.974	74.359	73.333	78.974	98.718	87.179	73.846	78.974
KP118880 ck/CH/LHB/130927/14 China	88.718	71.795	71.282	71.354	71.282	67.111	71.875	72.917	72.396	72.396	72.396	72.396	72.396	71.875	72.396	72.396	71.875	71.875	71.875	75	73.846	65.625	71.875	74.872	72.396	71.875	72.396	78.462	72.917	78.462	80	100	99.487	100	74.359	74.359	74.359	74.359	84.103	74.872	73.333	78.974	74.359	73.333	78.974	98.718	87.179	73.846	78.974
KP118888 ck/CH/LLN/130102/15 China	88.718	71.795	71.282	71.354	71.282	67.111	71.875	72.917	72.396	72.396	72.396	72.396	72.396	71.875	72.396	72.396	71.875	71.875	71.875	75	73.846	65.625	71.875	74.872	72.396	71.875	72.396	78.462	72.917	78.462	80	100	99.487	100	74.359	74.359	74.359	74.359	84.103	74.872	73.333	78.974	74.359	73.333	78.974	98.718	87.179	73.846	78.974
MZ367369 IBV/Ck/Bel/4134_001/19 Belgium	88.718	71.795	71.282	71.354	71.282	67.111	71.875	72.917	72.396	72.396	72.396	72.396	72.396	71.875	72.396	72.396	71.875	71.875	71.875	75	73.846	65.625	71.875	74.872	72.396	71.875	72.396	78.462	72.917	78.462	80	100	99.487	100	74.359	74.359	74.359	74.359	84.103	74.872	73.333	78.974	74.359	73.333	78.974	98.718	87.179	73.846	78.974
KP118884 ck/CH/LSD/110651/15 China	88.718	71.795	71.282	71.354	71.282	67.111	71.875	72.917	72.396	72.396	72.396	72.396	72.396	71.875	72.396	72.396	71.875	71.875	71.875	75	73.846	65.625	71.875	74.872	72.396	71.875	72.396	78.462	72.917	78.462	80	100	99.487	100	74.359	74.359	74.359	74.359	84.103	74.872	73.333	78.974	74.359	73.333	78.974	98.718	87.179	73.846	78.974
KP118882 ck/CH/LBJ/140402/14 China	88.718	71.795	71.282	71.354	71.282	67.111	71.875	72.917	72.396	72.396	72.396	72.396	72.396	71.875	72.396	72.396	71.875	71.875	71.875	75	73.846	65.625	71.875	74.872	72.396	71.875	72.396	78.462	72.917	78.462	80	100	99.487	100	74.359	74.359	74.359	74.359	84.103	74.872	73.333	78.974	74.359	73.333	78.974	98.718	87.179	73.846	78.974
KP118892 ck/CH/LLN/120101 China	88.718	71.795	71.282	71.354	71.282	67.111	71.875	72.917	72.396	72.396	72.396	72.396	72.396	71.875	72.396	72.396	71.875	71.875	71.875	75	73.846	65.625	71.875	74.872	72.396	71.875	72.396	78.462	72.917	78.462	80	100	99.487	100	74.359	74.359	74.359	74.359	84.103	74.872	73.333	78.974	74.359	73.333	78.974	98.718	87.179	73.846	78.974
KP118891 ck/CH/LHLJ/111246/14 China	88.718	71.795	71.282	71.354	71.282	67.111	71.875	72.917	72.396	72.396	72.396	72.396	72.396	71.875	72.396	72.396	71.875	71.875	71.875	75	73.846	65.625	71.875	74.872	72.396	71.875	72.396	78.462	72.917	78.462	80	100	99.487	100	74.359	74.359	74.359	74.359	84.103	74.872	73.333	78.974	74.359	73.333	78.974	98.718	87.179	73.846	78.974
KP118893 ck/CH/LSD/110410/14 China	88.718	71.795	71.282	71.354	71.282	67.111	71.875	72.917	72.396	72.396	72.396	72.396	72.396	71.875	72.396	72.396	71.875	71.875	71.875	75	73.846	65.625	71.875	74.872	72.396	71.875	72.396	78.462	72.917	78.462	80	100	99.487	100	74.359	74.359	74.359	74.359	84.103	74.872	73.333	78.974	74.359	73.333	78.974	98.718	87.179	73.846	78.974
KP036503 ck/CH/LHB/121010 China	88.718	71.795	71.282	71.354	71.282	67.111	71.875	72.917	72.396	72.396	72.396	72.396	72.396	71.875	72.396	72.396	71.875	71.875	71.875	75	73.846	65.625	71.875	74.872	72.396	71.875	72.396	78.462	72.917	78.462	80	100	99.487	100	74.359	74.359	74.359	74.359	84.103	74.872	73.333	78.974	74.359	73.333	78.974	98.718	87.179	73.846	78.974
KP036504 ck/CH/LHB/130630 China	88.718	71.795	71.282	71.354	71.282	67.111	71.875	72.917	72.396	72.396	72.396	72.396	72.396	71.875	72.396	72.396	71.875	71.875	71.875	75	73.846	65.625	71.875	74.872	72.396	71.875	72.396	78.462	72.917	78.462	80	100	99.487	100	74.359	74.359	74.359	74.359	84.103	74.872	73.333	78.974	74.359	73.333	78.974	98.718	87.179	73.846	78.974
KP118883 ck/CH/LHB/121041 China	88.718	71.795	71.282	71.354	71.282	67.111	71.875	72.917	72.396	72.396	72.396	72.396	72.396	71.875	72.396	72.396	71.875	71.875	71.875	75	73.846	65.625	71.875	74.872	72.396	71.875	72.396	78.462	72.917	78.462	80	100	99.487	100	74.359	74.359	74.359	74.359	84.103	74.872	73.333	78.974	74.359	73.333	78.974	98.718	87.179	73.846	78.974
KP118887 ck/CH/LHB/140532/14 China	88.718	71.795	71.282	71.354	71.282	67.111	71.875	72.917	72.396	72.396	72.396	72.396	72.396	71.875	72.396	72.396	71.875	71.875	71.875	75	73.846	65.625	71.875	74.872	72.396	71.875	72.396	78.462	72.917	78.462	80	100	99.487	100	74.359	74.359	74.359	74.359	84.103	74.872	73.333	78.974	74.359	73.333	78.974	98.718	87.179	73.846	78.974
KP118885 ck/CH/LSD/110857/14 China	88.718	71.795	71.282	71.354	71.282	67.111	71.875	72.917	72.396	72.396	72.396	72.396	72.396	71.875	72.396	72.396	71.875	71.875	71.875	75	73.846	65.625	71.875	74.872	72.396	71.875	72.396	78.462	72.917	78.462	80	100	99.487	100	74.359	74.359	74.359	74.359	84.103	74.872	73.333	78.974	74.359	73.333	78.974	98.718	87.179	73.846	78.974
KP036502 ck/CH/LHLJ/140906 China	88.718	71.795	71.282	71.354	71.282	67.111	71.875	72.917	72.396	72.396	72.396	72.396	72.396	71.875	72.396	72.396	71.875	71.875	71.875	75	73.846	65.625	71.875	74.872	72.396	71.875	72.396	78.462	72.917	78.462	80	100	99.487	100	74.359	74.359	74.359	74.359	84.103	74.872	73.333	78.974	74.359	73.333	78.974	98.718	87.179	73.846	78.974
KJ135013 IBVUkr27/11 Ukraine	90.769	72.308	70.256	71.354	70.256	67.556	71.875	72.917	72.396	72.396	72.396	72.396	72.396	71.875	72.396	72.396	71.875	71.875	71.875	75	72.821	65.104	71.875	74.359	72.396	71.875	72.396	78.974	72.917	78.974	78.974	94.872	94.359	94.872	74.872	74.872	74.872	74.872	81.538	75.385	73.333	78.462	74.872	73.846	79.487	93.59	86.154	74.359	79.487
KJ425496 ck/CH/LHB/130573 China	74.872	86.154	87.692	88.021	89.231	66.222	88.542	92.188	89.063	89.063	89.063	89.063	88.021	88.542	89.063	88.542	88.542	88.542	88.542	86.458	96.875	86.772	87.5	94.872	89.063	88.542	89.063	78.462	88.542	77.949	74.359	73.333	73.333	73.333	90.256	90.769	90.769	90.769	81.026	86.667	90.256	88.718	90.256	89.744	88.205	72.564	79.487	90.769	88.205
KP343691 ck/CH/LGX/130530 China	74.872	86.154	87.692	88.021	89.231	66.222	88.542	92.188	89.063	89.063	89.063	89.063	88.021	88.542	89.063	88.542	88.542	88.542	88.542	86.458	96.875	86.772	87.5	94.872	89.063	88.542	89.063	78.462	88.542	77.949	74.359	73.333	73.333	73.333	90.256	90.769	90.769	90.769	81.026	86.667	90.256	88.718	90.256	89.744	88.205	72.564	79.487	90.769	88.205
KT736032 ck/CHLDL150434-II/16 China	74.872	86.154	87.692	88.021	89.231	66.222	88.542	92.188	89.063	89.063	89.063	89.063	88.021	88.542	89.063	88.542	88.542	88.542	88.542	86.458	96.875	86.772	87.5	94.872	89.063	88.542	89.063	78.462	88.542	77.949	74.359	73.333	73.333	73.333	90.256	90.769	90.769	90.769	81.026	86.667	90.256	88.718	90.256	89.744	88.205	72.564	79.487	90.769	88.205
KU356856 ck/CH/SCYB/140913/25 China	74.872	86.154	87.692	88.021	89.231	66.222	88.542	92.188	89.063	89.063	89.063	89.063	88.021	88.542	89.063	88.542	88.542	88.542	88.542	86.458	96.875	86.772	87.5	94.872	89.063	88.542	89.063	78.462	88.542	77.949	74.359	73.333	73.333	73.333	90.256	90.769	90.769	90.769	81.026	86.667	90.256	88.718	90.256	89.744	88.205	72.564	79.487	90.769	88.205
MT505388 CK/CH/SCMY/160315/20 China	77.436	87.692	88.205	88.542	89.744	66.222	88.021	91.667	88.542	88.542	88.542	88.542	88.542	88.021	88.542	88.021	88.021	88.021	88.021	85.938	94.301	85.263	88.021	94.872	88.542	88.021	88.542	78.462	88.542	77.949	75.385	73.846	73.846	73.846	91.795	92.308	92.308	92.308	79.487	87.692	91.795	88.718	91.795	91.282	89.744	73.59	78.974	92.308	89.744
KJ425497 ck/CH/LHB/130598/14 China	85.128	76.923	76.41	79.688	77.436	69.333	77.083	78.646	77.604	77.604	77.604	77.604	77.604	77.083	77.604	77.604	77.083	77.083	77.083	85.417	78.462	70.313	78.125	80	77.604	77.083	77.604	81.026	77.604	81.538	82.564	85.641	85.128	85.641	76.923	77.436	77.436	77.436	87.692	76.923	76.923	80.513	76.923	76.41	80	84.359	92.821	78.462	80
FN430415 NGA/A116E7/06 Nigeria	82.051	78.462	77.949	76.563	74.872	64.889	75.521	75	76.042	76.042	76.042	76.042	77.083	75.521	76.042	76.042	75.521	75.521	75.521	79.167	75.385	67.708	76.563	76.923	76.042	75.521	76.042	75.385	76.563	75.897	79.487	84.615	85.128	84.615	74.872	74.872	74.872	74.872	82.564	76.41	74.872	78.974	74.872	73.846	78.462	83.333	87.179	74.872	78.462
KR231009 B1648/84 Belgium	93.333	70.769	70.769	71.354	70.769	65.778	70.833	71.875	71.354	71.354	71.354	71.354	71.354	70.833	71.354	71.354	70.833	70.833	70.833	73.958	72.308	64.063	70.833	73.846	71.354	70.833	71.354	76.923	71.875	76.923	78.974	91.795	91.282	91.795	72.308	72.308	72.308	72.308	81.026	72.821	71.282	76.923	72.308	72.308	76.923	92.051	84.615	71.795	76.923
MN548285 CR88 (4/91)/88 France	90.769	71.795	71.795	71.354	72.308	64.889	71.354	72.396	71.875	71.875	71.875	71.875	71.875	71.354	71.875	71.875	71.354	71.354	71.354	74.479	72.821	64.583	71.354	74.359	71.875	71.354	71.875	75.897	72.396	75.897	78.974	90.256	89.744	90.256	71.795	71.795	71.795	71.795	82.564	73.333	71.795	76.41	71.795	71.795	76.41	90	84.615	72.308	76.41
MN548288 Italy02/02 Italy	90.769	72.308	72.308	72.396	71.282	67.556	71.875	72.917	72.396	72.396	72.396	72.396	72.396	71.875	72.396	72.396	71.875	71.875	71.875	75	74.359	65.625	71.875	74.359	72.396	71.875	72.396	78.974	72.917	78.974	82.051	91.282	90.769	91.282	72.821	72.821	72.821	72.821	84.615	74.359	72.821	77.436	72.821	71.795	77.436	90	86.667	73.333	77.436
MG021194 gCoV/Ck/IT/624I/96 Italy	91.282	70.769	70.256	71.875	70.769	65.778	71.875	72.917	72.396	72.396	72.396	72.396	72.396	71.875	72.396	72.396	71.875	71.875	71.875	75	72.308	67.196	71.875	74.872	72.396	71.875	72.396	76.923	72.917	76.923	77.949	89.744	89.231	89.744	72.821	72.821	72.821	72.821	80	73.333	71.795	77.436	72.821	71.795	77.436	89.487	84.615	72.308	77.436
KU900739 QIA-03342/03 Korea	88.718	71.795	71.795	70.833	71.795	68	71.875	72.917	72.396	72.396	72.396	72.396	72.396	71.875	72.396	72.396	72.917	71.875	72.917	73.958	74.359	65.625	71.875	74.359	72.396	72.917	72.396	79.487	72.917	78.974	81.538	90.769	90.256	90.769	72.821	72.821	72.821	72.821	82.564	74.359	72.821	75.897	72.821	72.308	75.897	89.487	86.154	73.333	75.897
KU900744 QIA-Q43/06 Korea	88.718	71.795	71.795	70.833	71.795	68	71.875	72.917	72.396	72.396	72.396	72.396	72.396	71.875	72.396	72.396	72.917	71.875	72.917	73.958	74.359	65.625	71.875	74.359	72.396	72.917	72.396	79.487	72.917	78.974	81.538	90.769	90.256	90.769	72.821	72.821	72.821	72.821	82.564	74.359	72.821	75.897	72.821	72.308	75.897	89.487	86.154	73.333	75.897
KJ425504 ck/CH/LHJL/091205 China	85.128	76.923	76.41	79.167	77.436	69.333	77.083	78.646	77.604	77.604	77.604	77.604	77.604	77.083	77.604	77.604	77.083	77.083	77.083	84.896	78.462	70.313	78.125	80	77.604	77.083	77.604	81.026	77.604	81.538	82.051	86.154	85.641	86.154	76.923	77.436	77.436	77.436	88.205	77.436	76.923	81.026	76.923	76.41	80.513	84.872	93.333	78.462	80.513
MH539771 IBV/SES/15AB-01 Canada	85.128	76.923	76.41	79.167	77.436	69.333	77.083	78.646	77.604	77.604	77.604	77.604	77.604	77.083	77.604	77.604	77.083	77.083	77.083	84.896	78.462	70.313	78.125	80	77.604	77.083	77.604	81.026	77.604	81.538	82.051	86.154	85.641	86.154	76.923	77.436	77.436	77.436	88.205	77.436	76.923	81.026	76.923	76.41	80.513	84.872	93.333	78.462	80.513
MH539772 IBV/SES/15SK-02 Canada	85.128	76.923	76.41	79.167	77.436	69.333	77.083	78.646	77.604	77.604	77.604	77.604	77.604	77.083	77.604	77.604	77.083	77.083	77.083	84.896	78.462	70.313	78.125	80	77.604	77.083	77.604	81.026	77.604	81.538	82.051	86.154	85.641	86.154	76.923	77.436	77.436	77.436	88.205	77.436	76.923	81.026	76.923	76.41	80.513	84.872	93.333	78.462	80.513
MK937830 M41/19 China	85.128	76.923	76.41	79.167	77.436	69.333	77.083	78.646	77.604	77.604	77.604	77.604	77.604	77.083	77.604	77.604	77.083	77.083	77.083	84.896	78.462	70.313	78.125	80	77.604	77.083	77.604	81.026	77.604	81.538	82.051	86.154	85.641	86.154	76.923	77.436	77.436	77.436	88.205	77.436	76.923	81.026	76.923	76.41	80.513	84.872	93.333	78.462	80.513
MW446887 IBV/M41/Y192 China	85.128	76.923	76.41	79.167	77.436	69.333	77.083	78.646	77.604	77.604	77.604	77.604	77.604	77.083	77.604	77.604	77.083	77.083	77.083	84.896	78.462	70.313	78.125	80	77.604	77.083	77.604	81.026	77.604	81.538	82.051	86.154	85.641	86.154	76.923	77.436	77.436	77.436	88.205	77.436	76.923	81.026	76.923	76.41	80.513	84.872	93.333	78.462	80.513
MW429061 IBV/M41/Y28 China	85.128	76.923	76.41	79.167	77.436	69.333	77.083	78.646	77.604	77.604	77.604	77.604	77.604	77.083	77.604	77.604	77.083	77.083	77.083	84.896	78.462	70.313	78.125	80	77.604	77.083	77.604	81.026	77.604	81.538	82.051	86.154	85.641	86.154	76.923	77.436	77.436	77.436	88.205	77.436	76.923	81.026	76.923	76.41	80.513	84.872	93.333	78.462	80.513
MW446888 IBV/M41/Y27 China	85.128	76.923	76.41	79.167	77.436	69.333	77.083	78.646	77.604	77.604	77.604	77.604	77.604	77.083	77.604	77.604	77.083	77.083	77.083	84.896	78.462	70.313	78.125	80	77.604	77.083	77.604	81.026	77.604	81.538	82.051	86.154	85.641	86.154	76.923	77.436	77.436	77.436	88.205	77.436	76.923	81.026	76.923	76.41	80.513	84.872	93.333	78.462	80.513
MW429062 IBV/M41/N56 China	85.128	76.923	76.41	79.167	77.436	69.333	77.083	78.646	77.604	77.604	77.604	77.604	77.604	77.083	77.604	77.604	77.083	77.083	77.083	84.896	78.462	70.313	78.125	80	77.604	77.083	77.604	81.026	77.604	81.538	82.051	86.154	85.641	86.154	76.923	77.436	77.436	77.436	88.205	77.436	76.923	81.026	76.923	76.41	80.513	84.872	93.333	78.462	80.513
MK728875 M41-CK/17 UK	85.128	76.923	76.41	79.167	77.436	69.333	77.083	78.646	77.604	77.604	77.604	77.604	77.604	77.083	77.604	77.604	77.083	77.083	77.083	84.896	78.462	70.313	78.125	80	77.604	77.083	77.604	81.026	77.604	81.538	82.051	86.154	85.641	86.154	76.923	77.436	77.436	77.436	88.205	77.436	76.923	81.026	76.923	76.41	80.513	84.872	93.333	78.462	80.513
KJ435286 ck/CH/LSD/1112150 China	85.128	76.923	76.41	79.167	77.436	69.333	77.083	78.646	77.604	77.604	77.604	77.604	77.604	77.083	77.604	77.604	77.083	77.083	77.083	84.896	78.462	70.313	78.125	80	77.604	77.083	77.604	81.026	77.604	81.538	82.051	86.154	85.641	86.154	76.923	77.436	77.436	77.436	88.205	77.436	76.923	81.026	76.923	76.41	80.513	84.872	93.333	78.462	80.513
KY047602 gCoV/Ck/Pol/G052/16 Poland	82.564	73.958	73.958	74.074	74.479	68.919	73.545	75.132	74.074	74.074	74.074	74.074	75.132	73.545	74.074	74.074	73.545	74.074	73.545	76.72	75	69.841	74.603	76.042	74.074	73.545	74.074	81.25	74.603	81.25	79.167	83.59	83.077	83.59	75	75	75	75	81.538	73.438	73.958	77.083	75	73.958	76.563	82.308	84.615	75	76.563
MK581207 gCoV/Ck/Pol/G103/16 Poland	83.077	73.438	73.438	74.603	73.958	69.369	74.074	75.661	74.603	74.603	74.603	74.603	75.661	74.074	74.603	74.603	74.074	74.603	74.074	77.249	75.521	70.37	75.132	76.563	74.603	74.074	74.603	81.771	75.132	81.771	79.688	84.103	83.59	84.103	75.521	75.521	75.521	75.521	81.026	73.958	74.479	77.604	75.521	74.479	77.083	82.821	85.128	75.521	77.083
MK581208 gCoV/Ck/Pol/G225/17 Poland	82.051	73.438	73.438	73.545	73.958	68.468	73.016	74.603	73.545	73.545	73.545	73.545	74.603	74.074	73.545	73.545	73.016	73.545	73.016	76.19	74.479	69.312	74.074	75.521	73.545	73.016	73.545	80.729	74.074	80.729	78.646	83.077	82.564	83.077	74.479	74.479	74.479	74.479	81.026	72.917	73.438	76.563	74.479	73.438	76.042	81.795	84.103	74.479	76.042
MK581202 gCoV/Ck/Pol/80/89 Poland	83.077	74.872	75.385	74.479	74.872	66.667	77.083	77.083	77.083	77.083	77.083	77.083	76.042	76.563	77.083	77.083	77.604	76.563	77.604	78.125	77.949	69.271	75.521	78.462	77.083	77.604	77.083	78.974	77.604	77.949	81.026	85.128	84.615	85.128	76.41	76.41	76.41	76.41	87.692	76.923	75.897	77.949	76.41	75.385	77.949	83.846	87.692	76.41	77.949
MK581203 gCoV/Ck/Pol/162/97 Poland	91.795	72.308	72.308	71.354	70.256	65.333	72.917	71.875	72.396	72.396	72.396	72.396	72.396	71.875	72.396	72.396	71.875	71.875	71.875	73.958	71.795	64.063	71.875	74.359	72.396	71.875	72.396	76.41	72.917	76.41	79.487	89.744	89.231	89.744	72.308	72.308	72.308	72.308	81.538	72.821	71.795	76.923	72.308	72.308	76.923	90	86.154	72.308	76.923
MK581204 gCoV/Ck/Pol/255/97 Poland	92.821	72.821	71.795	72.917	71.795	64.889	72.396	73.438	72.917	72.917	72.917	72.917	72.917	72.396	72.917	72.917	72.396	72.396	72.396	75.521	73.333	65.625	72.396	75.897	72.917	72.396	72.917	75.897	73.438	75.897	77.949	91.282	90.769	91.282	73.333	73.333	73.333	73.333	81.026	74.872	73.333	77.949	73.333	72.308	77.949	91.026	85.641	73.846	77.949
MT591566 CK/DE/IB80/16 Germany	88.718	70.769	70.769	70.833	70.769	67.556	71.354	72.396	71.875	71.875	71.875	71.875	71.875	71.354	71.875	71.875	71.354	71.354	71.354	74.479	73.846	65.104	71.354	73.846	71.875	71.354	71.875	78.974	72.396	78.974	81.538	95.897	95.385	95.897	73.333	73.333	73.333	73.333	84.103	73.846	72.308	77.949	73.333	72.308	77.949	94.615	86.154	72.821	77.949
MN987231 IBV/ck/EGY-Monuf/USC-3/13 Egypt	90.769	71.282	70.769	71.875	71.795	65.333	72.396	73.438	72.917	72.917	72.917	72.917	72.917	72.396	72.917	72.917	72.396	72.396	72.396	74.479	73.333	67.725	72.396	75.897	72.917	72.396	72.917	76.923	73.438	76.41	78.974	89.744	89.231	89.744	72.821	72.821	72.821	72.821	82.051	74.359	72.821	76.41	72.821	71.795	76.41	89.487	85.128	73.333	76.41
KR608272 LDT3-A/03 China	74.872	89.063	89.583	91.005	91.146	68.468	91.534	95.238	92.063	92.063	92.063	92.063	91.005	91.534	92.063	91.534	91.534	91.534	91.534	89.418	100	89.785	90.476	97.396	92.063	91.534	92.063	81.25	91.534	80.729	77.083	73.846	73.846	73.846	93.229	93.75	93.75	93.75	81.538	89.583	93.229	91.146	93.229	92.708	91.146	72.564	80	93.75	91.146
MK574042 ck/CH/LHB/110615/19 China	77.949	76.563	77.604	75.661	74.479	71.689	77.249	77.249	77.778	77.778	77.778	77.778	77.778	77.249	77.778	77.778	77.249	77.778	77.249	75.661	78.125	73.118	77.249	78.646	77.778	77.249	77.778	86.772	78.307	85.714	97.354	79.487	78.974	79.487	76.042	76.042	76.042	76.042	84.103	77.604	76.042	75	76.042	76.563	75	78.205	83.59	76.563	75
MK574043 ck/CH/LHB/110627/19 China	77.949	76.563	77.604	75.661	74.479	71.689	77.249	77.249	77.778	77.778	77.778	77.778	77.778	77.249	77.778	77.778	77.249	77.778	77.249	75.661	78.125	73.118	77.249	78.646	77.778	77.249	77.778	86.772	78.307	85.714	97.354	79.487	78.974	79.487	76.042	76.042	76.042	76.042	84.103	77.604	76.042	75	76.042	76.563	75	78.205	83.59	76.563	75
MN548286 D1466/84 UK	82.564	76.41	75.897	76.042	75.385	69.778	76.563	78.125	77.083	77.083	77.083	77.083	77.083	76.563	77.083	77.083	76.563	76.563	76.563	77.604	78.462	70.313	76.563	79.487	77.083	76.563	77.083	81.538	77.083	82.051	83.077	83.077	82.564	83.077	77.436	77.949	77.949	77.949	90.256	77.949	76.923	77.436	77.436	78.462	78.462	81.795	91.282	78.974	78.462
[truncated: 52 more columns]

## Sheet: Envelope
Table S1f. Nucleotide identities between sequences in the QX dataset (n=101). Envelope gene.
	KR822424 TCoV/080385d/08 France	OM525802 D532/9/CH/05	KX219797 ck/CH/LXJ/02I/16 China	KX252772 ck/CH/LSHH/03II/16 China	KX252778 ck/CH/LJL/05I/16 China	HQ848267 GX-YL5/05 China	KF411041 CK/CH/LGX/091109/13 China	KP118886 ck/CH/LSD/111235/14 China	KX185058 ck/CH/LGS/08I/16 China	KX219791 ck/CH/LHLJ/07I/16 China	KX219792 ck/CH/LGS/06I/16 China	KX375805 ck/CH/LJS/07V/16 China	KX252789 ck/CH/LHLJ/090605/16 China	KX252777 ck/CH/LSD/07I/16 China	KX364293 ck/CH/LJL/07III/16 China	KX219794 ck/CH/LJS/101109/16 China	KX236009 ck/CH/LSX/130132/16 China	KX259250 ck/CH/LJS/101113/16 China	KX302862 ck/CH/LJS/101111/16 China	KX364299 ck/CH/LSD/101223/16 China	KX236007 ck/CH/LSD/100408/16 China	KX219801 ck/CH/LSD/120437/16 China	MK032181 gCoV/ck/Chi/I0347/11 China	KX275391 ck/CH/LHLJ/140927/16 China	KX219800 ck/CH/LSD/130611/16 China	KX252787 ck/CH/LLN/131040/16/ China	KX252785 ck/CH/LSD/100311/16 China	KY407556 gCoV/ck/Chi/I0114/14 China	MK618759 K047-12/12 Korea	HM245924 CQ04-1/04 China	KX252779 ck/CH/LLN/06I/16 China	MK032177 gCoV/ck/Chi/I0724/17 China	MK032179 gCoV/ck/Chi/I0922/17 China	MK032180 gCoV/ck/China/I0737/17 China	OM525803 D535/4/FR/05	KY933089 1148-A/field/17 UK	MN548289 QX UK	KY933090 L1148/vaccine/17 UK	MK581205 gCoV/Ck/Pol/548/04 Poland	OM525806 D722/SK/06	OM525804 D591/2/GR/05	KX272465 AR251-15/14 Sudan	FN430414 ITA/90254/05 Italy	JQ088078 CK/SWE/065/8946/10 Sweden	KT886454 gCoV/Ck/Pol/74/09 Poland	MK581206 gCoV/Ck/Pol/195/12 Poland	OM525805 D683/HU/06	KX236001 ck/CH/LSD/03I/16 China	KP662631 ck/ZA/3665/11 South Africa
KR822424 TCoV/080385d/08 France	76.855	75.298	74.551	76.558	74.85	74.775	74.775	74.775	75.075	75.075	74.474	75.375	75.075	75.075	75.375	75.075	75.375	75.375	75.075	75.075	74.775	75.375	76.786	75.075	75.375	75.075	73.874	76.048	70.914	77.742	77.538	77.231	77.538	76.855	76.855	76.855	76.558	76.647	76.855	76.261	76.558	76.855	78.042	76.558	76.558	79.08	76.577	75.668	77.538
OM525802 D532/9/CH/05	76.855		90.991	92.424	95.195	90.303	91.212	91.212	91.212	91.515	91.515	90.909	91.212	91.515	91.515	91.212	90.909	91.212	91.212	90.909	90.909	91.212	91.515	92.192	91.515	91.515	91.515	86.364	95.152	83.056	85.113	82.583	82.282	82.583	98.799	98.799	98.799	98.498	97.273	98.799	97.598	97.297	98.799	89.79	98.498	92.192	86.336	97.273	96.997
KX219797 ck/CH/LXJ/02I/16 China	75.298	90.991		88.485	92.793	83.939	96.024	96.024	95.719	96.33	96.33	95.719	96.024	96.33	96.33	96.024	95.719	96.024	96.024	95.719	95.719	96.024	96.33	96.061	96.33	95.719	96.33	92.049	89.697	77.222	83.495	81.024	80.723	81.024	90.691	90.691	90.691	90.39	90.909	90.691	90.09	90.991	90.691	85.586	90.39	87.087	82.733	93.578	88.889
KX252772 ck/CH/LSHH/03II/16 China	74.551	92.424	88.485		93.939	87.879	90.303	90.303	90	90.606	90.606	90	90.303	90.606	90.606	90.303	90	90.303	90.303	90.606	87.273	90.303	90.606	90	90.606	90	90	85.152	93.333	80.833	81.877	81.212	80.909	81.212	93.03	93.03	93.03	92.727	92.121	93.03	92.121	91.515	93.03	86.061	92.727	88.182	82.576	90.606	92.121
KX252778 ck/CH/LJL/05I/16 China	76.558	95.195	92.793	93.939		89.091	90.606	90.606	90.303	90.909	90.909	90.303	90.606	90.909	90.909	90.606	90.303	90.606	90.606	90.909	90.606	90.606	91.212	93.093	90.909	90.303	90.909	87.576	94.242	81.944	83.819	82.583	82.282	82.583	95.796	95.796	95.796	95.495	95.455	95.796	95.195	94.895	95.796	87.688	95.495	91.291	83.634	93.333	94.595
HQ848267 GX-YL5/05 China	74.85	90.303	83.939	87.879	89.091		84.242	84.545	84.848	84.545	84.545	83.939	84.848	84.545	84.545	84.848	84.545	84.848	84.848	85.152	86.97	84.242	84.545	86.061	84.545	85.152	84.242	90.606	88.182	90.833	88.026	83.03	82.727	83.03	89.697	89.697	89.697	89.394	90	89.697	88.788	89.394	89.697	83.636	90	90.909	82.576	87.879	89.091
KF411041 CK/CH/LGX/091109/13 China	74.775	91.212	96.024	90.303	90.606	84.242		98.777	99.083	99.694	99.694	99.083	99.388	99.694	99.694	99.388	99.083	99.388	99.388	99.083	93.884	99.388	99.388	95.719	99.694	99.083	99.083	92.966	91.212	77.5	83.172	80.547	80.243	80.547	90.303	90.303	90.303	90	90	90.303	89.697	90	90.303	86.061	90	86.364	84.091	93.272	88.485
KP118886 ck/CH/LSD/111235/14 China	74.775	91.212	96.024	90.303	90.606	84.545	98.777		98.471	99.083	99.083	98.471	98.777	99.083	99.083	98.777	98.471	98.777	98.777	98.471	93.884	98.777	98.777	95.719	99.083	98.471	99.083	92.661	91.212	77.222	83.495	79.939	79.635	79.939	90.303	90.303	90.303	90	90	90.303	89.697	90	90.303	85.758	90.606	85.455	83.485	93.272	88.485
KX185058 ck/CH/LGS/08I/16 China	74.775	91.212	95.719	90	90.303	84.848	99.083	98.471		99.388	99.388	98.777	99.083	99.388	99.388	99.083	98.777	99.083	99.083	98.777	93.578	99.083	99.083	95.413	99.388	99.083	98.777	93.272	91.212	78.056	83.819	80.547	80.243	80.547	90.303	90.303	90.303	90	90	90.303	89.697	90	90.303	86.061	90	86.061	84.697	93.272	88.485
KX219791 ck/CH/LHLJ/07I/16 China	75.075	91.515	96.33	90.606	90.909	84.545	99.694	99.083	99.388		100	99.388	99.694	100	100	99.694	99.388	99.694	99.694	99.388	94.19	99.694	99.694	96.024	100	99.388	99.388	93.272	91.515	77.778	83.495	80.243	79.939	80.243	90.606	90.606	90.606	90.303	90.303	90.606	90	90.303	90.606	86.364	90.303	86.061	84.394	93.578	88.788
KX219792 ck/CH/LGS/06I/16 China	75.075	91.515	96.33	90.606	90.909	84.545	99.694	99.083	99.388	100		99.388	99.694	100	100	99.694	99.388	99.694	99.694	99.388	94.19	99.694	99.694	96.024	100	99.388	99.388	93.272	91.515	77.778	83.495	80.243	79.939	80.243	90.606	90.606	90.606	90.303	90.303	90.606	90	90.303	90.606	86.364	90.303	86.061	84.394	93.578	88.788
KX375805 ck/CH/LJS/07V/16 China	74.474	90.909	95.719	90	90.303	83.939	99.083	98.471	98.777	99.388	99.388		99.083	99.388	99.388	99.083	98.777	99.083	99.083	98.777	93.578	99.083	99.083	95.413	99.388	98.777	98.777	92.661	90.909	77.222	82.848	79.635	79.331	79.635	90	90	90	89.697	89.697	90	89.394	89.697	90	86.364	89.697	85.455	83.788	92.966	88.182
KX252789 ck/CH/LHLJ/090605/16 China	75.375	91.212	96.024	90.303	90.606	84.848	99.388	98.777	99.083	99.694	99.694	99.083		99.694	99.694	99.388	99.083	99.388	99.388	99.083	94.495	99.388	99.388	95.719	99.694	99.083	99.083	92.966	91.212	78.056	83.172	79.939	79.635	79.939	90.303	90.303	90.303	90	90	90.303	89.697	90	90.303	86.364	90	85.758	84.394	93.272	88.485
KX252777 ck/CH/LSD/07I/16 China	75.075	91.515	96.33	90.606	90.909	84.545	99.694	99.083	99.388	100	100	99.388	99.694		100	99.694	99.388	99.694	99.694	99.388	94.19	99.694	99.694	96.024	100	99.388	99.388	93.272	91.515	77.778	83.495	80.243	79.939	80.243	90.606	90.606	90.606	90.303	90.303	90.606	90	90.303	90.606	86.364	90.303	86.061	84.394	93.578	88.788
KX364293 ck/CH/LJL/07III/16 China	75.075	91.515	96.33	90.606	90.909	84.545	99.694	99.083	99.388	100	100	99.388	99.694	100		99.694	99.388	99.694	99.694	99.388	94.19	99.694	99.694	96.024	100	99.388	99.388	93.272	91.515	77.778	83.495	80.243	79.939	80.243	90.606	90.606	90.606	90.303	90.303	90.606	90	90.303	90.606	86.364	90.303	86.061	84.394	93.578	88.788
KX219794 ck/CH/LJS/101109/16 China	75.375	91.212	96.024	90.303	90.606	84.848	99.388	98.777	99.083	99.694	99.694	99.083	99.388	99.694	99.694		99.694	100	100	99.694	93.884	99.388	99.388	95.719	99.694	99.694	99.083	93.578	91.212	78.056	83.819	80.547	80.243	80.547	90.303	90.303	90.303	90	90	90.303	89.697	90.606	90.303	86.061	90	86.364	84.091	93.272	89.091
KX236009 ck/CH/LSX/130132/16 China	75.075	90.909	95.719	90	90.303	84.545	99.083	98.471	98.777	99.388	99.388	98.777	99.083	99.388	99.388	99.694		99.694	99.694	99.388	93.578	99.083	99.083	95.413	99.388	99.388	98.777	93.272	90.909	77.778	83.495	80.243	79.939	80.243	90	90	90	89.697	89.697	90	89.394	90.303	90	85.758	89.697	86.061	83.788	92.966	88.788
KX259250 ck/CH/LJS/101113/16 China	75.375	91.212	96.024	90.303	90.606	84.848	99.388	98.777	99.083	99.694	99.694	99.083	99.388	99.694	99.694	100	99.694		100	99.694	93.884	99.388	99.388	95.719	99.694	99.694	99.083	93.578	91.212	78.056	83.819	80.547	80.243	80.547	90.303	90.303	90.303	90	90	90.303	89.697	90.606	90.303	86.061	90	86.364	84.091	93.272	89.091
KX302862 ck/CH/LJS/101111/16 China	75.375	91.212	96.024	90.303	90.606	84.848	99.388	98.777	99.083	99.694	99.694	99.083	99.388	99.694	99.694	100	99.694	100		99.694	93.884	99.388	99.388	95.719	99.694	99.694	99.083	93.578	91.212	78.056	83.819	80.547	80.243	80.547	90.303	90.303	90.303	90	90	90.303	89.697	90.606	90.303	86.061	90	86.364	84.091	93.272	89.091
KX364299 ck/CH/LSD/101223/16 China	75.075	90.909	95.719	90.606	90.909	85.152	99.083	98.471	98.777	99.388	99.388	98.777	99.083	99.388	99.388	99.694	99.388	99.694	99.694		93.578	99.083	99.083	96.024	99.388	99.388	98.777	93.884	90.909	78.333	83.495	80.243	79.939	80.243	90	90	90	89.697	89.697	90	89.394	90.303	90	85.758	89.697	86.061	83.788	92.966	89.394
KX236007 ck/CH/LSD/100408/16 China	75.075	90.909	95.719	87.273	90.606	86.97	93.884	93.884	93.578	94.19	94.19	93.578	94.495	94.19	94.19	93.884	93.578	93.884	93.884	93.578		93.884	94.19	94.495	94.19	93.578	94.19	91.131	89.091	80	84.79	82.371	82.067	82.371	90	90	90	89.697	90.303	90	89.394	89.697	90	85.455	89.697	86.97	82.273	92.966	88.182
KX219801 ck/CH/LSD/120437/16 China	74.775	91.212	96.024	90.303	90.606	84.242	99.388	98.777	99.083	99.694	99.694	99.083	99.388	99.694	99.694	99.388	99.083	99.388	99.388	99.083	93.884		99.388	95.719	99.694	99.083	99.083	92.966	91.212	77.5	83.172	80.243	79.939	80.243	90.303	90.303	90.303	90	90	90.303	89.697	90	90.303	86.061	90	85.758	84.091	93.272	88.485
MK032181 gCoV/ck/Chi/I0347/11 China	75.375	91.515	96.33	90.606	91.212	84.545	99.388	98.777	99.083	99.694	99.694	99.083	99.388	99.694	99.694	99.388	99.083	99.388	99.388	99.083	94.19	99.388		96.33	99.694	99.083	99.083	92.966	91.515	77.778	83.495	80.547	80.243	80.547	90.606	90.606	90.606	90.303	90.303	90.606	90	90.303	90.606	86.364	90.303	86.061	84.394	93.578	88.788
KX275391 ck/CH/LHLJ/140927/16 China	76.786	92.192	96.061	90	93.093	86.061	95.719	95.719	95.413	96.024	96.024	95.413	95.719	96.024	96.024	95.719	95.413	95.719	95.719	96.024	94.495	95.719	96.33		96.024	95.413	96.024	92.661	90.303	79.167	84.466	81.627	81.325	81.627	91.291	91.291	91.291	90.991	90.909	91.291	90.691	90.991	91.291	85.886	90.991	87.688	83.934	94.19	90.09
KX219800 ck/CH/LSD/130611/16 China	75.075	91.515	96.33	90.606	90.909	84.545	99.694	99.083	99.388	100	100	99.388	99.694	100	100	99.694	99.388	99.694	99.694	99.388	94.19	99.694	99.694	96.024		99.388	99.388	93.272	91.515	77.778	83.495	80.243	79.939	80.243	90.606	90.606	90.606	90.303	90.303	90.606	90	90.303	90.606	86.364	90.303	86.061	84.394	93.578	88.788
KX252787 ck/CH/LLN/131040/16/ China	75.375	91.515	95.719	90	90.303	85.152	99.083	98.471	99.083	99.388	99.388	98.777	99.083	99.388	99.388	99.694	99.388	99.694	99.694	99.388	93.578	99.083	99.083	95.413	99.388		98.777	93.272	91.515	78.333	84.142	80.547	80.243	80.547	90.606	90.606	90.606	90.303	90.303	90.606	90	90.909	90.606	86.364	90.303	86.061	84.394	93.578	89.394
KX252785 ck/CH/LSD/100311/16 China	75.075	91.515	96.33	90	90.909	84.242	99.083	99.083	98.777	99.388	99.388	98.777	99.083	99.388	99.388	99.083	98.777	99.083	99.083	98.777	94.19	99.083	99.083	96.024	99.388	98.777		92.966	91.515	77.5	83.495	80.243	79.939	80.243	90.606	90.606	90.606	90.303	90.303	90.606	90	90.303	90.606	86.061	90.303	85.758	84.091	93.578	88.788
KY407556 gCoV/ck/Chi/I0114/14 China	73.874	86.364	92.049	85.152	87.576	90.606	92.966	92.661	93.272	93.272	93.272	92.661	92.966	93.272	93.272	93.578	93.272	93.578	93.578	93.884	91.131	92.966	92.966	92.661	93.272	93.272	92.966		85.152	83.333	87.055	82.067	81.763	82.067	85.455	85.455	85.455	85.152	86.364	85.455	84.848	85.758	85.455	82.121	85.152	87.879	81.364	88.379	84.848
MK618759 K047-12/12 Korea	76.048	95.152	89.697	93.333	94.242	88.182	91.212	91.212	91.212	91.515	91.515	90.909	91.212	91.515	91.515	91.212	90.909	91.212	91.212	90.909	89.091	91.212	91.515	90.303	91.515	91.515	91.515	85.152		81.111	84.79	81.212	80.909	81.212	96.061	96.061	96.061	95.758	95.152	96.061	95.455	95.152	96.061	87.879	95.758	90	83.788	93.636	94.242
HM245924 CQ04-1/04 China	70.914	83.056	77.222	80.833	81.944	90.833	77.5	77.222	78.056	77.778	77.778	77.222	78.056	77.778	77.778	78.056	77.778	78.056	78.056	78.333	80	77.5	77.778	79.167	77.778	78.333	77.5	83.333	81.111		87.702	76.389	76.111	76.389	82.5	82.5	82.5	82.222	82.778	82.5	81.667	82.222	82.5	76.944	82.222	83.611	75.972	80.833	81.944
KX252779 ck/CH/LLN/06I/16 China	77.742	85.113	83.495	81.877	83.819	88.026	83.172	83.495	83.819	83.495	83.495	82.848	83.172	83.495	83.495	83.819	83.495	83.819	83.819	83.495	84.79	83.172	83.495	84.466	83.495	84.142	83.495	87.055	84.79	87.702		83.819	83.495	83.819	85.113	85.113	85.113	84.79	86.084	85.113	84.466	85.761	85.113	81.877	84.79	86.408	82.524	85.761	83.819
MK032177 gCoV/ck/Chi/I0724/17 China	77.538	82.583	81.024	81.212	82.583	83.03	80.547	79.939	80.547	80.243	80.243	79.635	79.939	80.243	80.243	80.547	80.243	80.547	80.547	80.243	82.371	80.243	80.547	81.627	80.243	80.547	80.243	82.067	81.212	76.389	83.819		99.688	100	82.583	82.583	82.583	82.282	83.333	82.583	81.682	82.583	82.583	81.381	82.282	88.288	77.327	82.675	81.381
MK032179 gCoV/ck/Chi/I0922/17 China	77.231	82.282	80.723	80.909	82.282	82.727	80.243	79.635	80.243	79.939	79.939	79.331	79.635	79.939	79.939	80.243	79.939	80.243	80.243	79.939	82.067	79.939	80.243	81.325	79.939	80.243	79.939	81.763	80.909	76.111	83.495	99.688		99.688	82.282	82.282	82.282	81.982	83.03	82.282	81.381	82.282	82.282	81.081	81.982	87.988	77.027	82.371	81.081
MK032180 gCoV/ck/China/I0737/17 China	77.538	82.583	81.024	81.212	82.583	83.03	80.547	79.939	80.547	80.243	80.243	79.635	79.939	80.243	80.243	80.547	80.243	80.547	80.547	80.243	82.371	80.243	80.547	81.627	80.243	80.547	80.243	82.067	81.212	76.389	83.819	100	99.688		82.583	82.583	82.583	82.282	83.333	82.583	81.682	82.583	82.583	81.381	82.282	88.288	77.327	82.675	81.381
OM525803 D535/4/FR/05	76.855	98.799	90.691	93.03	95.796	89.697	90.303	90.303	90.303	90.606	90.606	90	90.303	90.606	90.606	90.303	90	90.303	90.303	90	90	90.303	90.606	91.291	90.606	90.606	90.606	85.455	96.061	82.5	85.113	82.583	82.282	82.583		100	100	99.7	98.485	100	98.799	97.898	100	90.39	99.7	93.393	86.036	96.97	98.198
KY933089 1148-A/field/17 UK	76.855	98.799	90.691	93.03	95.796	89.697	90.303	90.303	90.303	90.606	90.606	90	90.303	90.606	90.606	90.303	90	90.303	90.303	90	90	90.303	90.606	91.291	90.606	90.606	90.606	85.455	96.061	82.5	85.113	82.583	82.282	82.583	100		100	99.7	98.485	100	98.799	97.898	100	90.39	99.7	93.393	86.036	96.97	98.198
MN548289 QX UK	76.855	98.799	90.691	93.03	95.796	89.697	90.303	90.303	90.303	90.606	90.606	90	90.303	90.606	90.606	90.303	90	90.303	90.303	90	90	90.303	90.606	91.291	90.606	90.606	90.606	85.455	96.061	82.5	85.113	82.583	82.282	82.583	100	100		99.7	98.485	100	98.799	97.898	100	90.39	99.7	93.393	86.036	96.97	98.198
KY933090 L1148/vaccine/17 UK	76.558	98.498	90.39	92.727	95.495	89.394	90	90	90	90.303	90.303	89.697	90	90.303	90.303	90	89.697	90	90	89.697	89.697	90	90.303	90.991	90.303	90.303	90.303	85.152	95.758	82.222	84.79	82.282	81.982	82.282	99.7	99.7	99.7		98.182	99.7	98.498	97.598	99.7	90.09	99.399	93.093	85.736	96.667	97.898
MK581205 gCoV/Ck/Pol/548/04 Poland	76.647	97.273	90.909	92.121	95.455	90	90	90	90	90.303	90.303	89.697	90	90.303	90.303	90	89.697	90	90	89.697	90.303	90	90.303	90.909	90.303	90.303	90.303	86.364	95.152	82.778	86.084	83.333	83.03	83.333	98.485	98.485	98.485	98.182		98.485	97.576	96.97	98.485	89.697	98.182	93.939	86.515	96.061	96.667
OM525806 D722/SK/06	76.855	98.799	90.691	93.03	95.796	89.697	90.303	90.303	90.303	90.606	90.606	90	90.303	90.606	90.606	90.303	90	90.303	90.303	90	90	90.303	90.606	91.291	90.606	90.606	90.606	85.455	96.061	82.5	85.113	82.583	82.282	82.583	100	100	100	99.7	98.485		98.799	97.898	100	90.39	99.7	93.393	86.036	96.97	98.198
OM525804 D591/2/GR/05	76.261	97.598	90.09	92.121	95.195	88.788	89.697	89.697	89.697	90	90	89.394	89.697	90	90	89.697	89.394	89.697	89.697	89.394	89.394	89.697	90	90.691	90	90	90	84.848	95.455	81.667	84.466	81.682	81.381	81.682	98.799	98.799	98.799	98.498	97.576	98.799		96.997	98.799	89.79	98.498	92.492	85.736	95.758	96.997
KX272465 AR251-15/14 Sudan	76.558	97.297	90.991	91.515	94.895	89.394	90	90	90	90.303	90.303	89.697	90	90.303	90.303	90.606	90.303	90.606	90.606	90.303	89.697	90	90.303	90.991	90.303	90.909	90.303	85.758	95.152	82.222	85.761	82.583	82.282	82.583	97.898	97.898	97.898	97.598	96.97	97.898	96.997		97.898	88.889	97.598	92.492	85.135	96.061	96.697
FN430414 ITA/90254/05 Italy	76.855	98.799	90.691	93.03	95.796	89.697	90.303	90.303	90.303	90.606	90.606	90	90.303	90.606	90.606	90.303	90	90.303	90.303	90	90	90.303	90.606	91.291	90.606	90.606	90.606	85.455	96.061	82.5	85.113	82.583	82.282	82.583	100	100	100	99.7	98.485	100	98.799	97.898		90.39	99.7	93.393	86.036	96.97	98.198
JQ088078 CK/SWE/065/8946/10 Sweden	78.042	89.79	85.586	86.061	87.688	83.636	86.061	85.758	86.061	86.364	86.364	86.364	86.364	86.364	86.364	86.061	85.758	86.061	86.061	85.758	85.455	86.061	86.364	85.886	86.364	86.364	86.061	82.121	87.879	76.944	81.877	81.381	81.081	81.381	90.39	90.39	90.39	90.09	89.697	90.39	89.79	88.889	90.39		90.09	86.186	88.739	88.788	88.589
KT886454 gCoV/Ck/Pol/74/09 Poland	76.558	98.498	90.39	92.727	95.495	90	90	90.606	90	90.303	90.303	89.697	90	90.303	90.303	90	89.697	90	90	89.697	89.697	90	90.303	90.991	90.303	90.303	90.303	85.152	95.758	82.222	84.79	82.282	81.982	82.282	99.7	99.7	99.7	99.399	98.182	99.7	98.498	97.598	99.7	90.09		93.093	85.736	96.667	97.898
MK581206 gCoV/Ck/Pol/195/12 Poland	76.558	92.192	87.087	88.182	91.291	90.909	86.364	85.455	86.061	86.061	86.061	85.455	85.758	86.061	86.061	86.364	86.061	86.364	86.364	86.061	86.97	85.758	86.061	87.688	86.061	86.061	85.758	87.879	90	83.611	86.408	88.288	87.988	88.288	93.393	93.393	93.393	93.093	93.939	93.393	92.492	92.492	93.393	86.186	93.093		83.333	90.909	92.192
HUOM525805 D683/HU/06	79.08	86.336	82.733	82.576	83.634	82.576	84.091	83.485	84.697	84.394	84.394	83.788	84.394	84.394	84.394	84.091	83.788	84.091	84.091	83.788	82.273	84.091	84.394	83.934	84.394	84.394	84.091	81.364	83.788	75.972	82.524	77.327	77.027	77.327	86.036	86.036	86.036	85.736	86.515	86.036	85.736	85.135	86.036	88.739	85.736	83.333		85	84.234
KX236001 ck/CH/LSD/03I/16 China	76.577	97.273	93.578	90.606	93.333	87.879	93.272	93.272	93.272	93.578	93.578	92.966	93.272	93.578	93.578	93.272	92.966	93.272	93.272	92.966	92.966	93.272	93.578	94.19	93.578	93.578	93.578	88.379	93.636	80.833	85.761	82.675	82.371	82.675	96.97	96.97	96.97	96.667	96.061	96.97	95.758	96.061	96.97	88.788	96.667	90.909	85		95.152
KP662631 ck/ZA/3665/11 South Africa	75.668	96.997	88.889	92.121	94.595	89.091	88.485	88.485	88.485	88.788	88.788	88.182	88.485	88.788	88.788	89.091	88.788	89.091	89.091	89.394	88.182	88.485	88.788	90.09	88.788	89.394	88.788	84.848	94.242	81.944	83.819	81.381	81.081	81.381	98.198	98.198	98.198	97.898	96.667	98.198	96.997	96.697	98.198	88.589	97.898	92.192	84.234	95.152
KF377577 4/91 vaccine China	77.538	82.583	81.024	81.212	82.583	83.03	80.547	79.939	80.547	80.243	80.243	79.635	79.939	80.243	80.243	80.547	80.243	80.547	80.547	80.243	82.371	80.243	80.547	81.627	80.243	80.547	80.243	82.067	81.212	76.389	83.819	100	99.688	100	82.583	82.583	82.583	82.282	83.333	82.583	81.682	82.583	82.583	81.381	82.282	88.288	77.327	82.675	81.381
KP118881 ck/CH/LBJ/140413/14 China	77.538	82.583	81.024	81.212	82.583	83.03	80.547	79.939	80.547	80.243	80.243	79.635	79.939	80.243	80.243	80.547	80.243	80.547	80.547	80.243	82.371	80.243	80.547	81.627	80.243	80.547	80.243	82.067	81.212	76.389	83.819	100	99.688	100	82.583	82.583	82.583	82.282	83.333	82.583	81.682	82.583	82.583	81.381	82.282	88.288	77.327	82.675	81.381
KP118880 ck/CH/LHB/130927/14 China	77.538	82.583	81.024	81.212	82.583	83.03	80.547	79.939	80.547	80.243	80.243	79.635	79.939	80.243	80.243	80.547	80.243	80.547	80.547	80.243	82.371	80.243	80.547	81.627	80.243	80.547	80.243	82.067	81.212	76.389	83.819	100	99.688	100	82.583	82.583	82.583	82.282	83.333	82.583	81.682	82.583	82.583	81.381	82.282	88.288	77.327	82.675	81.381
KP118888 ck/CH/LLN/130102/15 China	77.538	82.583	81.024	81.212	82.583	83.03	80.547	79.939	80.547	80.243	80.243	79.635	79.939	80.243	80.243	80.547	80.243	80.547	80.547	80.243	82.371	80.243	80.547	81.627	80.243	80.547	80.243	82.067	81.212	76.389	83.819	100	99.688	100	82.583	82.583	82.583	82.282	83.333	82.583	81.682	82.583	82.583	81.381	82.282	88.288	77.327	82.675	81.381
MZ367369 IBV/Ck/Bel/4134_001/19 Belgium	77.538	82.583	81.024	81.212	82.583	83.03	80.547	79.939	80.547	80.243	80.243	79.635	79.939	80.243	80.243	80.547	80.243	80.547	80.547	80.243	82.371	80.243	80.547	81.627	80.243	80.547	80.243	82.067	81.212	76.389	83.819	100	99.688	100	82.583	82.583	82.583	82.282	83.333	82.583	81.682	82.583	82.583	81.381	82.282	88.288	77.327	82.675	81.381
KP118884 ck/CH/LSD/110651/15 China	77.538	82.583	81.024	81.212	82.583	83.03	80.547	79.939	80.547	80.243	80.243	79.635	79.939	80.243	80.243	80.547	80.243	80.547	80.547	80.243	82.371	80.243	80.547	81.627	80.243	80.547	80.243	82.067	81.212	76.389	83.819	99.688	99.377	99.688	82.583	82.583	82.583	82.282	83.333	82.583	81.682	82.583	82.583	81.381	82.282	88.288	77.327	82.675	81.381
KP118882 ck/CH/LBJ/140402/14 China	77.538	82.583	81.024	81.212	82.583	83.03	80.547	79.939	80.547	80.243	80.243	79.635	79.939	80.243	80.243	80.547	80.243	80.547	80.547	80.243	82.371	80.243	80.547	81.627	80.243	80.547	80.243	82.067	81.212	76.389	83.819	100	99.688	100	82.583	82.583	82.583	82.282	83.333	82.583	81.682	82.583	82.583	81.381	82.282	88.288	77.327	82.675	81.381
KP118892 ck/CH/LLN/120101 China	77.538	82.583	81.024	81.212	82.583	83.03	80.547	79.939	80.547	80.243	80.243	79.635	79.939	80.243	80.243	80.547	80.243	80.547	80.547	80.243	82.371	80.243	80.547	81.627	80.243	80.547	80.243	82.067	81.212	76.389	83.819	100	99.688	100	82.583	82.583	82.583	82.282	83.333	82.583	81.682	82.583	82.583	81.381	82.282	88.288	77.327	82.675	81.381
KP118891 ck/CH/LHLJ/111246/14 China	77.538	82.583	81.024	81.212	82.583	83.03	80.547	79.939	80.547	80.243	80.243	79.635	79.939	80.243	80.243	80.547	80.243	80.547	80.547	80.243	82.371	80.243	80.547	81.627	80.243	80.547	80.243	82.067	81.212	76.389	83.819	100	99.688	100	82.583	82.583	82.583	82.282	83.333	82.583	81.682	82.583	82.583	81.381	82.282	88.288	77.327	82.675	81.381
KP118893 ck/CH/LSD/110410/14 China	77.538	82.583	81.024	81.212	82.583	83.03	80.547	79.939	80.547	80.243	80.243	79.635	79.939	80.243	80.243	80.547	80.243	80.547	80.547	80.243	82.371	80.243	80.547	81.627	80.243	80.547	80.243	82.067	81.212	76.389	83.819	100	99.688	100	82.583	82.583	82.583	82.282	83.333	82.583	81.682	82.583	82.583	81.381	82.282	88.288	77.327	82.675	81.381
KP036503 ck/CH/LHB/121010 China	77.538	82.583	81.024	81.212	82.583	83.03	80.547	79.939	80.547	80.243	80.243	79.635	79.939	80.243	80.243	80.547	80.243	80.547	80.547	80.243	82.371	80.243	80.547	81.627	80.243	80.547	80.243	82.067	81.212	76.389	83.819	100	99.688	100	82.583	82.583	82.583	82.282	83.333	82.583	81.682	82.583	82.583	81.381	82.282	88.288	77.327	82.675	81.381
KP036504 ck/CH/LHB/130630 China	77.538	82.583	81.024	81.212	82.583	83.03	80.547	79.939	80.547	80.243	80.243	79.635	79.939	80.243	80.243	80.547	80.243	80.547	80.547	80.243	82.371	80.243	80.547	81.627	80.243	80.547	80.243	82.067	81.212	76.389	83.819	100	99.688	100	82.583	82.583	82.583	82.282	83.333	82.583	81.682	82.583	82.583	81.381	82.282	88.288	77.327	82.675	81.381
KP118883 ck/CH/LHB/121041 China	77.538	82.282	80.723	80.909	82.282	82.727	80.243	79.635	80.243	79.939	79.939	79.331	79.635	79.939	79.939	80.243	79.939	80.243	80.243	79.939	82.067	79.939	80.243	81.627	79.939	80.243	79.939	81.763	80.909	76.111	83.495	99.688	99.377	99.688	82.282	82.282	82.282	81.982	83.03	82.282	81.381	82.282	82.282	81.081	81.982	87.988	77.327	82.371	81.081
KP118887 ck/CH/LHB/140532/14 China	76.923	82.583	81.024	80.606	81.982	83.03	80.547	79.939	80.851	80.243	80.243	80.243	79.939	80.243	80.243	80.547	80.243	80.547	80.547	80.243	82.371	80.243	80.547	81.627	80.243	80.547	80.243	82.067	80.606	76.389	83.495	99.065	98.754	99.065	81.982	81.982	81.982	81.682	82.727	81.982	81.081	82.583	81.982	81.381	81.682	87.688	77.327	82.675	80.781
KP118885 ck/CH/LSD/110857/14 China	77.538	82.583	81.024	81.212	82.583	83.03	80.547	79.939	80.547	80.243	80.243	79.635	79.939	80.243	80.243	80.547	80.243	80.547	80.547	80.243	82.371	80.243	80.547	81.627	80.243	80.547	80.243	82.067	81.212	76.389	83.819	100	99.688	100	82.583	82.583	82.583	82.282	83.333	82.583	81.682	82.583	82.583	81.381	82.282	88.288	77.327	82.675	81.381
KP036502 ck/CH/LHLJ/140906 China	77.538	82.583	81.024	81.212	82.583	83.03	80.547	79.939	80.547	80.243	80.243	79.635	79.939	80.243	80.243	80.547	80.243	80.547	80.547	80.243	82.371	80.243	80.547	81.627	80.243	80.547	80.243	82.067	81.212	76.389	83.819	100	99.688	100	82.583	82.583	82.583	82.282	83.333	82.583	81.682	82.583	82.583	81.381	82.282	88.288	77.327	82.675	81.381
KJ135013 IBVUkr27/11 Ukraine	90.244	87.879	83.838	84.014	85.185	83.333	84.354	84.354	84.354	84.694	84.694	84.014	85.034	84.694	84.694	85.034	84.694	85.034	85.034	84.694	85.034	84.354	84.694	85.859	84.694	85.034	84.694	82.313	85.374	83.673	85.034	82.492	82.155	82.492	87.542	87.542	87.542	87.205	86.395	87.542	86.532	86.532	87.542	87.879	87.205	84.512	86.195	87.415	86.195
KJ425496 ck/CH/LHB/130573 China	76.364	90.332	94.242	86.707	90.03	86.405	92.424	92.424	92.121	92.727	92.727	92.121	93.03	92.727	92.727	92.424	92.121	92.424	92.424	92.121	97.879	92.424	92.727	93.03	92.727	92.121	92.727	89.697	88.52	80	85.113	83.18	82.875	83.18	89.426	89.426	89.426	89.124	89.728	89.426	88.822	89.124	89.426	85.498	89.124	86.405	82.024	91.515	87.613
KP343691 ck/CH/LGX/130530 China	76.061	90.03	93.939	86.405	89.728	86.103	92.121	92.121	91.818	92.424	92.424	91.818	92.727	92.424	92.424	92.121	91.818	92.121	92.121	91.818	98.182	92.121	92.424	92.727	92.424	91.818	92.424	89.394	88.218	79.722	84.79	82.875	82.569	82.875	89.124	89.124	89.124	88.822	89.426	89.124	88.52	88.822	89.124	85.196	88.822	86.103	81.722	91.212	87.311
KT736032 ck/CHLDL150434-II/16 China	76.061	90.03	94.545	87.009	89.728	86.103	92.727	92.727	92.424	93.03	93.03	92.424	93.333	93.03	93.03	92.727	92.424	92.727	92.727	92.424	97.576	92.727	93.03	93.333	93.03	92.424	93.03	90	88.218	79.722	84.79	82.875	82.569	82.875	89.124	89.124	89.124	88.822	89.426	89.124	88.52	88.822	89.124	85.801	88.822	86.103	82.326	91.212	87.311
KU356856 ck/CH/SCYB/140913/25 China	76.364	90.332	94.242	86.707	90.03	86.405	92.424	92.424	92.121	92.727	92.727	92.121	93.03	92.727	92.727	92.424	92.121	92.424	92.424	92.121	97.879	92.424	92.727	93.03	92.727	92.121	92.727	89.697	88.52	80	85.113	83.18	82.875	83.18	89.426	89.426	89.426	89.124	89.728	89.426	88.822	89.124	89.426	85.498	89.124	86.405	82.024	91.515	87.613
MT505388 CK/CH/SCMY/160315/20 China	89.716	91.844	92.553	91.756	92.908	84.229	92.832	92.473	92.473	93.19	93.19	92.473	92.832	93.19	93.19	92.832	92.473	92.832	92.832	92.473	89.964	92.832	92.832	93.972	93.19	92.473	92.832	87.455	90.681	83.871	88.172	84.043	83.688	84.043	91.844	91.844	91.844	91.489	91.398	91.844	91.135	90.78	91.844	90.426	91.489	87.234	90.426	91.756	89.716
KJ425497 ck/CH/LHB/130598/14 China	74.545	86.707	83.939	83.384	84.894	85.801	84.242	84.848	84.848	84.545	84.545	83.939	84.848	84.545	84.545	84.242	83.939	84.242	84.242	84.545	85.455	84.242	84.545	86.061	84.545	84.545	84.545	83.333	85.498	79.167	84.79	81.346	81.04	81.346	86.103	86.103	86.103	85.801	86.707	86.103	85.196	86.405	86.103	82.477	86.405	84.29	81.118	88.182	84.894
FN430415 NGA/A116E7/06 Nigeria	86.23	81.982	81.682	82.424	82.282	75.152	81.818	81.515	81.515	82.121	82.121	81.818	82.424	82.121	82.121	81.818	81.515	81.818	81.818	81.515	80.303	81.818	82.121	82.583	82.121	81.515	81.818	77.273	80.606	69.167	77.023	76.543	76.235	76.543	81.982	81.982	81.982	81.682	81.818	81.982	81.381	81.081	81.982	80.781	81.682	77.778	81.832	81.515	80.18
KR231009 B1648/84 Belgium	87.413	76.282	76.282	76.052	77.885	75.728	75.728	75.405	75.081	75.405	75.405	75.405	75.405	75.405	75.405	75.081	74.757	75.081	75.081	75.405	76.375	75.081	75.728	78.526	75.405	75.405	75.405	76.052	75.728	76.052	78.641	77.346	77.023	77.346	76.603	76.603	76.603	76.282	76.699	76.603	75.962	76.603	76.603	81.41	76.282	76.923	80.769	76.699	75.321
MN548285 CR88 (4/91)/88 France	86.926	77.67	77.346	76.797	79.288	76.471	76.144	76.144	76.144	76.471	76.471	76.471	76.471	76.471	76.471	76.144	75.817	76.144	76.144	76.471	77.124	76.144	76.797	79.288	76.471	76.471	76.471	77.124	77.124	76.797	79.412	78.758	78.431	78.758	77.994	77.994	77.994	77.67	78.105	77.994	77.346	77.67	77.994	82.201	77.67	78.641	80.906	77.778	76.699
MN548288 Italy02/02 Italy	91.873	81.046	79.739	79.412	81.046	79.412	79.085	79.085	79.739	79.412	79.412	78.758	79.739	79.412	79.412	79.739	79.412	79.739	79.739	79.412	80.392	79.085	79.412	80.719	79.412	79.739	79.412	79.085	81.373	79.739	82.68	79.276	78.947	79.276	81.373	81.373	81.373	81.046	81.699	81.373	80.719	81.046	81.373	80.719	81.046	81.373	83.66	81.373	80.065
MG021194 gCoV/Ck/IT/624I/96 Italy	89.619	78.846	78.205	77.994	78.526	76.052	78.317	78.641	77.994	78.641	78.641	77.994	78.964	78.641	78.641	78.317	77.994	78.317	78.317	77.994	78.317	78.317	78.641	80.449	78.641	77.994	78.641	77.023	77.346	76.375	78.641	76.129	75.806	76.129	78.526	78.526	78.526	78.205	77.994	78.526	77.885	77.885	78.526	81.09	78.205	77.885	82.051	78.641	76.603
KU900739 QIA-03342/03 Korea	75.749	93.636	86.97	89.394	91.818	93.939	86.061	86.061	86.667	86.364	86.364	85.758	86.061	86.364	86.364	86.667	86.364	86.667	86.667	86.364	87.576	86.061	86.364	87.879	86.364	86.97	86.364	89.394	91.818	86.111	90.291	84.242	83.939	84.242	94.848	94.848	94.848	94.545	95.152	94.848	93.939	93.939	94.848	85.758	94.545	95.152	84.091	91.818	93.636
KU900744 QIA-Q43/06 Korea	75.749	93.03	86.364	89.091	91.212	93.939	85.758	85.455	86.364	86.061	86.061	85.455	85.758	86.061	86.061	86.364	86.061	86.364	86.364	86.061	86.97	85.758	86.061	87.273	86.061	86.667	85.758	89.394	91.818	86.111	90.939	84.242	83.939	84.242	94.242	94.242	94.242	93.939	94.545	94.242	93.333	93.333	94.242	85.758	93.939	95.152	83.788	91.212	93.03
KJ425504 ck/CH/LHJL/091205 China	75.298	89.489	87.576	85.455	87.688	87.273	88.379	87.768	88.379	88.073	88.073	87.462	88.379	88.073	88.073	87.768	87.462	87.768	87.768	88.073	88.379	87.768	88.073	89.697	88.073	88.073	88.073	86.85	87.576	80.278	86.731	82.831	82.53	82.831	88.889	88.889	88.889	88.589	89.394	88.889	87.988	89.189	88.889	84.685	88.589	87.688	83.634	91.743	87.688
MH539771 IBV/SES/15AB-01 Canada	75.298	89.489	87.576	85.455	87.688	87.273	88.379	87.768	88.379	88.073	88.073	87.462	88.379	88.073	88.073	87.768	87.462	87.768	87.768	88.073	88.379	87.768	88.073	89.697	88.073	88.073	88.073	86.85	87.576	80.278	86.731	82.831	82.53	82.831	88.889	88.889	88.889	88.589	89.394	88.889	87.988	89.189	88.889	84.685	88.589	87.688	83.634	91.743	87.688
MH539772 IBV/SES/15SK-02 Canada	75.298	89.489	87.576	85.455	87.688	87.273	88.379	87.768	88.379	88.073	88.073	87.462	88.379	88.073	88.073	87.768	87.462	87.768	87.768	88.073	88.379	87.768	88.073	89.697	88.073	88.073	88.073	86.85	87.576	80.278	86.731	82.831	82.53	82.831	88.889	88.889	88.889	88.589	89.394	88.889	87.988	89.189	88.889	84.685	88.589	87.688	83.634	91.743	87.688
MK937830 M41/19 China	75.298	89.489	87.576	85.455	87.688	87.273	88.379	87.768	88.379	88.073	88.073	87.462	88.379	88.073	88.073	87.768	87.462	87.768	87.768	88.073	88.379	87.768	88.073	89.697	88.073	88.073	88.073	86.85	87.576	80.278	86.731	82.831	82.53	82.831	88.889	88.889	88.889	88.589	89.394	88.889	87.988	89.189	88.889	84.685	88.589	87.688	83.634	91.743	87.688
MW446887 IBV/M41/Y192 China	75.298	89.489	87.576	85.455	87.688	87.273	88.379	87.768	88.379	88.073	88.073	87.462	88.379	88.073	88.073	87.768	87.462	87.768	87.768	88.073	88.379	87.768	88.073	89.697	88.073	88.073	88.073	86.85	87.576	80.278	86.731	82.831	82.53	82.831	88.889	88.889	88.889	88.589	89.394	88.889	87.988	89.189	88.889	84.685	88.589	87.688	83.634	91.743	87.688
MW429061 IBV/M41/Y28 China	75.298	89.489	87.576	85.455	87.688	87.273	88.379	87.768	88.379	88.073	88.073	87.462	88.379	88.073	88.073	87.768	87.462	87.768	87.768	88.073	88.379	87.768	88.073	89.697	88.073	88.073	88.073	86.85	87.576	80.278	86.731	82.831	82.53	82.831	88.889	88.889	88.889	88.589	89.394	88.889	87.988	89.189	88.889	84.685	88.589	87.688	83.634	91.743	87.688
MW446888 IBV/M41/Y27 China	75.298	89.489	87.576	85.455	87.688	87.273	88.379	87.768	88.379	88.073	88.073	87.462	88.379	88.073	88.073	87.768	87.462	87.768	87.768	88.073	88.379	87.768	88.073	89.697	88.073	88.073	88.073	86.85	87.576	80.278	86.731	82.831	82.53	82.831	88.889	88.889	88.889	88.589	89.394	88.889	87.988	89.189	88.889	84.685	88.589	87.688	83.634	91.743	87.688
MW429062 IBV/M41/N56 China	75.298	89.489	87.576	85.455	87.688	87.273	88.379	87.768	88.379	88.073	88.073	87.462	88.379	88.073	88.073	87.768	87.462	87.768	87.768	88.073	88.379	87.768	88.073	89.697	88.073	88.073	88.073	86.85	87.576	80.278	86.731	82.831	82.53	82.831	88.889	88.889	88.889	88.589	89.394	88.889	87.988	89.189	88.889	84.685	88.589	87.688	83.634	91.743	87.688
MK728875 M41-CK/17 UK	74.702	89.489	87.576	85.455	87.688	87.879	88.379	87.768	88.379	88.073	88.073	87.462	88.379	88.073	88.073	87.768	87.462	87.768	87.768	88.073	88.379	87.768	88.073	89.697	88.073	88.073	88.073	87.462	87.576	80.833	86.731	82.229	81.928	82.229	88.889	88.889	88.889	88.589	89.394	88.889	87.988	89.189	88.889	84.084	88.589	87.087	83.634	91.743	87.688
KJ435286 ck/CH/LSD/1112150 China	75	89.189	87.273	85.758	87.387	87.576	88.073	87.462	88.073	87.768	87.768	87.156	88.073	87.768	87.768	87.462	87.156	87.462	87.462	87.768	88.685	87.462	87.768	89.394	87.768	87.768	87.768	86.544	87.273	80.556	86.408	83.133	82.831	83.133	88.589	88.589	88.589	88.288	89.091	88.589	87.688	88.889	88.589	84.384	88.288	87.387	83.333	91.437	87.387
KY047602 gCoV/Ck/Pol/G052/16 Poland	85.315	78.317	77.67	77.124	78.964	76.144	78.431	78.105	78.431	78.431	78.431	77.778	78.431	78.431	78.431	78.758	78.431	78.758	78.758	78.431	77.778	78.105	78.758	79.288	78.431	78.431	78.431	77.778	77.778	77.124	79.412	77.85	77.524	77.85	78.317	78.317	78.317	77.994	78.758	78.317	77.67	77.994	78.317	77.994	77.994	78.964	80.583	78.105	77.023
MK581207 gCoV/Ck/Pol/G103/16 Poland	84.965	78.641	77.994	77.451	79.288	76.471	78.758	78.431	78.758	78.758	78.758	78.105	78.758	78.758	78.758	79.085	78.758	79.085	79.085	78.758	78.105	78.431	79.085	79.612	78.758	78.758	78.758	78.105	78.105	76.797	79.739	78.176	77.85	78.176	78.641	78.641	78.641	78.317	79.085	78.641	77.994	78.317	78.641	78.317	78.317	79.288	80.906	78.431	77.346
MK581208 gCoV/Ck/Pol/G225/17 Poland	84.965	78.641	77.994	77.451	79.288	76.471	78.758	78.431	78.758	78.758	78.758	78.105	78.758	78.758	78.758	79.085	78.758	79.085	79.085	78.758	78.105	78.431	79.085	79.612	78.758	78.758	78.758	78.105	78.105	76.797	79.739	78.176	77.85	78.176	78.641	78.641	78.641	78.317	79.085	78.641	77.994	78.317	78.641	78.317	78.317	79.288	80.906	78.431	77.346
MK581202 gCoV/Ck/Pol/80/89 Poland	77.341	84.384	84.545	83.183	85.285	82.883	83.939	83.939	84.545	84.242	84.242	83.636	83.939	84.242	84.242	83.939	83.636	83.939	83.939	83.636	83.939	83.939	84.545	84.242	84.242	84.242	84.242	83.939	83.784	76.309	86.538	85.627	85.321	85.627	84.985	84.985	84.985	84.685	85.886	84.985	84.384	83.784	84.985	82.883	84.685	84.985	80.631	86.061	83.183
MK581203 gCoV/Ck/Pol/162/97 Poland	89.003	80.195	78.571	78.361	80.195	78.033	78.689	78.361	78.361	78.689	78.689	79.016	79.016	78.689	78.689	79.016	78.689	79.016	79.016	78.689	78.689	78.361	79.016	81.169	78.689	79.016	78.689	77.049	78.689	78.361	79.672	77.597	77.273	77.597	80.195	80.195	80.195	79.87	79.672	80.195	79.87	79.87	80.195	81.818	79.87	80.195	81.818	79.672	78.896
MK581204 gCoV/Ck/Pol/255/97 Poland	88.542	80.328	79.344	78.808	81.311	78.477	78.477	78.477	78.808	78.808	78.808	79.139	79.139	78.808	78.808	78.477	78.146	78.477	78.477	78.146	78.808	78.477	79.139	81.311	78.808	78.146	78.808	77.815	79.139	78.808	79.801	77.705	77.377	77.705	80.656	80.656	80.656	80.328	80.132	80.656	80	79.672	80.656	82.295	80.328	80.656	83.934	80.464	78.689
MT591566 CK/DE/IB80/16 Germany	87.986	79.739	77.778	77.451	79.085	76.797	77.778	77.778	77.778	78.105	78.105	78.105	77.778	78.105	78.105	77.778	77.451	77.778	77.778	77.451	78.105	77.778	78.431	79.739	78.105	78.105	78.105	76.471	78.431	77.124	79.412	78.289	77.961	78.289	79.412	79.412	79.412	79.085	79.739	79.412	79.085	79.085	79.412	82.353	79.085	77.778	81.699	79.412	77.451
MN987231 IBV/ck/EGY-Monuf/USC-3/13 Egypt	86.713	77.67	77.346	76.144	78.964	76.797	76.797	77.124	76.471	77.124	77.124	76.471	77.124	77.124	77.124	77.451	77.124	77.451	77.451	77.778	77.778	76.797	77.451	79.612	77.124	77.124	77.451	78.431	77.124	77.124	79.412	77.524	77.199	77.524	77.346	77.346	77.346	77.023	77.451	77.346	76.699	77.023	77.346	77.994	77.023	79.612	80.583	77.124	76.699
KR608272 LDT3-A/03 China	75.806	91.909	95.146	88.35	91.586	88.026	93.204	93.204	92.88	93.528	93.528	92.88	93.851	93.528	93.528	93.204	92.88	93.204	93.204	92.88	99.029	93.204	93.528	93.851	93.528	92.88	93.528	90.615	90.291	88.35	84.466	82.848	82.524	82.848	90.939	90.939	90.939	90.615	90.939	90.939	90.291	90.615	90.939	86.084	90.615	87.379	82.524	92.557	88.997
MK574042 ck/CH/LHB/110615/19 China	78.275	85.577	83.974	82.201	84.295	88.35	83.495	83.819	84.142	83.819	83.819	83.172	83.495	83.819	83.819	84.142	83.819	84.142	84.142	83.819	85.113	83.495	83.819	84.936	83.819	84.466	83.819	87.379	85.113	88.026	99.676	84.295	83.974	84.295	85.577	85.577	85.577	85.256	86.408	85.577	84.936	85.577	85.577	82.372	85.256	86.859	83.013	86.084	84.295
MK574043 ck/CH/LHB/110627/19 China	78.275	85.577	83.974	82.201	84.295	88.35	83.495	83.819	84.142	83.819	83.819	83.172	83.495	83.819	83.819	84.142	83.819	84.142	84.142	83.819	85.113	83.495	83.819	84.936	83.819	84.466	83.819	87.379	85.113	88.026	99.676	84.295	83.974	84.295	85.577	85.577	85.577	85.256	86.408	85.577	84.936	85.577	85.577	82.372	85.256	86.859	83.013	86.084	84.295
MN548286 D1466/84 UK	85.512	77.346	75.405	76.375	77.023	75.405	75.728	76.052	75.728	76.052	76.052	76.052	76.052	76.052	76.052	75.728	75.405	75.728	75.728	76.052	76.375	75.728	76.375	77.994	76.052	76.052	76.052	75.728	76.375	75.728	77.346	77.632	77.303	77.632	77.67	77.67	77.67	77.346	76.699	77.67	76.699	77.023	77.67	82.201	77.346	76.052	80.259	77.994	76.375
[truncated: 52 more columns]

## Sheet: Membrane
Table S1g. Nucleotide identities between sequences in the QX dataset (n=101). Membrane gene.
	KR822424 TCoV/080385d/08 France	OM525802 D532/9/CH/05	KX219797 ck/CH/LXJ/02I/16 China	KX252772 ck/CH/LSHH/03II/16 China	KX252778 ck/CH/LJL/05I/16 China	HQ848267 GX-YL5/05 China	KF411041 CK/CH/LGX/091109/13 China	KP118886 ck/CH/LSD/111235/14 China	KX185058 ck/CH/LGS/08I/16 China	KX219791 ck/CH/LHLJ/07I/16 China	KX219792 ck/CH/LGS/06I/16 China	KX375805 ck/CH/LJS/07V/16 China	KX252789 ck/CH/LHLJ/090605/16 China	KX252777 ck/CH/LSD/07I/16 China	KX364293 ck/CH/LJL/07III/16 China	KX219794 ck/CH/LJS/101109/16 China	KX236009 ck/CH/LSX/130132/16 China	KX259250 ck/CH/LJS/101113/16 China	KX302862 ck/CH/LJS/101111/16 China	KX364299 ck/CH/LSD/101223/16 China	KX236007 ck/CH/LSD/100408/16 China	KX219801 ck/CH/LSD/120437/16 China	MK032181 gCoV/ck/Chi/I0347/11 China	KX275391 ck/CH/LHLJ/140927/16 China	KX219800 ck/CH/LSD/130611/16 China	KX252787 ck/CH/LLN/131040/16/ China	KX252785 ck/CH/LSD/100311/16 China	KY407556 gCoV/ck/Chi/I0114/14 China	MK618759 K047-12/12 Korea	HM245924 CQ04-1/04 China	KX252779 ck/CH/LLN/06I/16 China	MK032177 gCoV/ck/Chi/I0724/17 China	MK032179 gCoV/ck/Chi/I0922/17 China	MK032180 gCoV/ck/China/I0737/17 China	OM525803 D535/4/FR/05	KY933089 1148-A/field/17 UK	MN548289 QX UK	KY933090 L1148/vaccine/17 UK	MK581205 gCoV/Ck/Pol/548/04 Poland	OM525806 D722/SK/06	OM525804 D591/2/GR/05	KX272465 AR251-15/14 Sudan	FN430414 ITA/90254/05 Italy	JQ088078 CK/SWE/065/8946/10 Sweden	KT886454 gCoV/Ck/Pol/74/09 Poland	MK581206 gCoV/Ck/Pol/195/12 Poland	OM525805 D683/HU/06	KX236001 ck/CH/LSD/03I/16 China	KP662631 ck/ZA/3665/11 South Africa
KR822424 TCoV/080385d/08 France	85.734	88.287	89.474	89.327	88.012	87.262	87.262	87.555	87.408	87.994	87.701	87.994	88.287	87.848	87.701	87.701	87.701	87.701	87.701	88.726	88.433	87.994	88.287	88.287	87.701	87.994	87.555	88.158	88.546	86.404	93.155	93.155	93.155	87.288	86.864	86.864	86.723	87.853	88.701	87.147	89.124	88.842	85.635	88.842	86.723	91.009	88.402	88.701	93.155
OM525802 D532/9/CH/05	85.734		89.427	92.07	92.364	98.385	90.308	89.721	91.043	91.336	90.015	89.868	90.015	90.015	90.015	89.721	89.721	89.721	89.721	89.721	92.217	91.189	90.162	90.162	90.162	89.427	89.427	93.245	91.924	94.42	89.427	89.721	89.721	89.721	92.149	91.763	91.763	91.634	91.892	92.921	91.377	92.149	92.664	85.294	91.892	91.763	90.088	90.605	91.377
KX219797 ck/CH/LXJ/02I/16 China	88.287	89.427		92.658	92.658	89.427	93.953	93.953	93.953	94.543	94.838	94.395	94.838	94.838	94.543	95.133	95.133	95.133	95.133	94.838	93.068	93.953	94.69	94.838	94.69	94.838	93.953	92.625	89.134	87.812	87.665	90.735	90.735	90.735	91.336	90.896	90.896	90.749	91.043	91.043	90.602	92.07	90.896	84.594	90.896	90.455	89.207	90.265	91.043
KX252772 ck/CH/LSHH/03II/16 China	89.474	92.07	92.658		95.301	91.777	90.896	91.483	90.162	90.455	92.07	91.924	92.07	92.364	91.777	91.777	91.777	91.777	91.777	91.777	91.336	93.245	92.07	92.07	91.924	91.483	91.483	90.162	91.63	89.868	89.134	90.896	90.896	90.896	95.154	94.86	94.86	94.714	92.364	93.539	94.42	93.833	92.07	85.714	92.364	92.217	90.529	90.749	93.245
KX252778 ck/CH/LJL/05I/16 China	89.327	92.364	92.658	95.301		92.658	90.015	90.602	90.455	91.336	91.483	91.043	91.483	91.483	91.63	91.483	91.483	91.483	91.483	91.189	91.189	92.364	91.189	91.336	91.336	91.189	90.602	91.189	91.63	90.455	88.546	90.602	90.602	90.602	93.539	93.098	93.098	92.952	92.07	92.511	92.805	93.539	92.658	85.294	92.511	91.63	90.088	90.602	92.952
HQ848267 GX-YL5/05 China	88.012	98.385	89.427	91.777	92.658		90.015	89.427	91.043	91.336	89.721	89.28	89.721	89.721	90.015	89.427	89.427	89.427	89.427	89.427	92.217	90.896	89.868	89.868	89.868	89.134	89.134	93.539	92.217	94.42	89.574	89.574	89.574	89.574	90.896	90.455	90.455	90.308	91.189	92.217	90.455	91.336	91.924	85.294	91.189	90.602	89.794	89.134	90.896
KF411041 CK/CH/LGX/091109/13 China	87.262	90.308	93.953	90.896	90.015	90.015		96.608	95.87	96.313	97.493	97.05	97.493	97.198	97.198	97.198	97.198	97.198	97.198	97.198	93.363	96.165	97.198	97.198	97.345	96.608	96.608	93.068	88.987	88.693	86.197	89.412	89.412	89.412	91.63	91.189	91.189	91.043	90.162	90.308	91.189	90.455	90.015	83.754	90.015	89.868	88.326	90.118	89.868
KP118886 ck/CH/LSD/111235/14 China	87.262	89.721	93.953	91.483	90.602	89.427	96.608		97.345	97.935	99.115	98.673	99.115	98.82	98.525	98.82	98.82	98.82	98.82	98.82	92.478	96.46	98.82	98.378	98.378	98.23	98.525	94.1	88.399	88.987	86.637	89.412	89.412	89.412	91.336	90.896	90.896	90.749	90.162	90.308	90.896	90.455	88.987	83.333	89.28	89.721	87.885	89.676	89.721
KX185058 ck/CH/LGS/08I/16 China	87.555	91.043	93.953	90.162	90.455	91.043	95.87	97.345		98.23	97.788	97.345	97.788	97.788	97.493	97.493	97.493	97.493	97.493	97.493	92.183	95.428	97.935	97.64	97.64	96.903	97.198	95.575	88.106	90.015	86.931	89.412	89.412	89.412	90.308	89.868	89.868	89.721	89.868	90.896	89.574	90.455	89.134	83.894	89.721	89.427	88.179	89.676	90.015
KX219791 ck/CH/LHLJ/07I/16 China	87.408	91.336	94.543	90.455	91.336	91.336	96.313	97.935	98.23		98.378	97.935	98.378	98.083	97.788	98.083	98.083	98.083	98.083	98.083	92.773	95.723	98.23	97.935	97.935	97.493	97.493	96.165	88.693	90.602	86.344	89.706	89.706	89.706	90.896	90.455	90.455	90.308	90.455	90.455	90.162	90.749	89.28	83.613	89.574	90.015	88.179	89.971	90.015
KX219792 ck/CH/LGS/06I/16 China	87.994	90.015	94.838	92.07	91.483	89.721	97.493	99.115	97.788	98.378		99.558	100	99.705	99.41	99.705	99.705	99.705	99.705	99.705	93.215	97.345	99.705	99.263	99.263	99.115	99.115	94.543	88.987	88.987	86.49	90.147	90.147	90.147	92.217	91.777	91.777	91.63	91.043	90.896	91.483	91.043	89.868	84.174	90.162	90.602	88.767	90.56	90.308
KX375805 ck/CH/LJS/07V/16 China	87.701	89.868	94.395	91.924	91.043	89.28	97.05	98.673	97.345	97.935	99.558		99.558	99.263	98.968	99.263	99.263	99.263	99.263	99.263	92.773	96.903	99.263	98.82	98.82	98.673	98.673	94.1	88.546	88.84	86.344	89.706	89.706	89.706	91.777	91.336	91.336	91.189	90.602	90.455	91.189	90.749	89.574	84.174	90.162	90.455	88.767	90.56	90.015
KX252789 ck/CH/LHLJ/090605/16 China	87.994	90.015	94.838	92.07	91.483	89.721	97.493	99.115	97.788	98.378	100	99.558		99.705	99.41	99.705	99.705	99.705	99.705	99.705	93.215	97.345	99.705	99.263	99.263	99.115	99.115	94.543	88.987	88.987	86.49	90.147	90.147	90.147	92.217	91.777	91.777	91.63	91.043	90.896	91.483	91.043	89.868	84.174	90.162	90.602	88.767	90.56	90.308
KX252777 ck/CH/LSD/07I/16 China	88.287	90.015	94.838	92.364	91.483	89.721	97.198	98.82	97.788	98.083	99.705	99.263	99.705		99.115	99.41	99.41	99.41	99.41	99.41	92.92	97.345	99.705	99.263	99.263	98.82	99.115	94.543	88.987	88.987	86.784	90.441	90.441	90.441	91.924	91.483	91.483	91.336	91.043	91.189	91.189	91.043	89.868	84.454	90.162	90.602	89.06	90.56	90.308
KX364293 ck/CH/LJL/07III/16 China	87.848	90.015	94.543	91.777	91.63	90.015	97.198	98.525	97.493	97.788	99.41	98.968	99.41	99.115		99.115	99.115	99.115	99.115	99.115	93.215	97.05	99.115	98.673	98.673	98.82	98.525	94.838	89.28	89.28	86.784	90.441	90.441	90.441	91.924	91.483	91.483	91.336	91.189	91.189	91.189	91.189	90.015	84.454	90.308	90.896	89.06	90.413	90.602
KX219794 ck/CH/LJS/101109/16 China	87.701	89.721	95.133	91.777	91.483	89.427	97.198	98.82	97.493	98.083	99.705	99.263	99.705	99.41	99.115		100	100	100	99.705	93.215	97.05	99.41	99.263	98.968	99.41	98.82	94.248	88.987	88.693	86.49	90.147	90.147	90.147	91.924	91.483	91.483	91.336	91.043	90.896	91.189	91.043	89.868	84.174	89.868	90.308	88.767	90.265	90.308
KX236009 ck/CH/LSX/130132/16 China	87.701	89.721	95.133	91.777	91.483	89.427	97.198	98.82	97.493	98.083	99.705	99.263	99.705	99.41	99.115	100		100	100	99.705	93.215	97.05	99.41	99.263	98.968	99.41	98.82	94.248	88.987	88.693	86.49	90.147	90.147	90.147	91.924	91.483	91.483	91.336	91.043	90.896	91.189	91.043	89.868	84.174	89.868	90.308	88.767	90.265	90.308
KX259250 ck/CH/LJS/101113/16 China	87.701	89.721	95.133	91.777	91.483	89.427	97.198	98.82	97.493	98.083	99.705	99.263	99.705	99.41	99.115	100	100		100	99.705	93.215	97.05	99.41	99.263	98.968	99.41	98.82	94.248	88.987	88.693	86.49	90.147	90.147	90.147	91.924	91.483	91.483	91.336	91.043	90.896	91.189	91.043	89.868	84.174	89.868	90.308	88.767	90.265	90.308
KX302862 ck/CH/LJS/101111/16 China	87.701	89.721	95.133	91.777	91.483	89.427	97.198	98.82	97.493	98.083	99.705	99.263	99.705	99.41	99.115	100	100	100		99.705	93.215	97.05	99.41	99.263	98.968	99.41	98.82	94.248	88.987	88.693	86.49	90.147	90.147	90.147	91.924	91.483	91.483	91.336	91.043	90.896	91.189	91.043	89.868	84.174	89.868	90.308	88.767	90.265	90.308
KX364299 ck/CH/LSD/101223/16 China	87.701	89.721	94.838	91.777	91.189	89.427	97.198	98.82	97.493	98.083	99.705	99.263	99.705	99.41	99.115	99.705	99.705	99.705	99.705		93.215	97.05	99.41	99.263	98.968	99.115	98.82	94.248	88.987	88.693	86.49	90.147	90.147	90.147	91.924	91.483	91.483	91.336	91.043	90.896	91.189	91.043	89.868	84.174	90.162	90.308	88.767	90.265	90.308
KX236007 ck/CH/LSD/100408/16 China	88.726	92.217	93.068	91.336	91.189	92.217	93.363	92.478	92.183	92.773	93.215	92.773	93.215	92.92	93.215	93.215	93.215	93.215	93.215	93.215		95.28	92.92	93.51	93.068	93.215	92.625	93.953	89.721	90.162	88.106	90.735	90.735	90.735	90.896	90.455	90.455	90.308	90.455	91.043	90.455	90.602	90.602	84.594	89.721	89.574	89.06	90.413	90.015
KX219801 ck/CH/LSD/120437/16 China	88.433	91.189	93.953	93.245	92.364	90.896	96.165	96.46	95.428	95.723	97.345	96.903	97.345	97.345	97.05	97.05	97.05	97.05	97.05	97.05	95.28		97.345	97.345	97.198	96.755	96.755	93.363	89.721	89.427	87.225	90.588	90.588	90.588	92.511	92.07	92.07	91.924	91.189	91.483	92.07	91.483	90.308	84.734	90.162	90.749	89.354	90.708	90.896
MK032181 gCoV/ck/Chi/I0347/11 China	87.994	90.162	94.69	92.07	91.189	89.868	97.198	98.82	97.935	98.23	99.705	99.263	99.705	99.705	99.115	99.41	99.41	99.41	99.41	99.41	92.92	97.345		99.263	99.263	98.82	99.115	94.69	88.693	89.134	86.49	90.294	90.294	90.294	91.924	91.483	91.483	91.336	90.749	90.896	91.189	90.749	89.574	84.174	89.868	90.308	88.767	90.265	90.015
KX275391 ck/CH/LHLJ/140927/16 China	88.287	90.162	94.838	92.07	91.336	89.868	97.198	98.378	97.64	97.935	99.263	98.82	99.263	99.263	98.673	99.263	99.263	99.263	99.263	99.263	93.51	97.345	99.263		99.115	98.673	98.673	94.543	89.134	89.134	86.931	90.588	90.588	90.588	92.217	91.777	91.777	91.63	91.336	91.483	91.189	91.336	90.015	84.594	90.162	90.602	89.207	90.56	90.602
KX219800 ck/CH/LSD/130611/16 China	88.287	90.162	94.69	91.924	91.336	89.868	97.345	98.378	97.64	97.935	99.263	98.82	99.263	99.263	98.673	98.968	98.968	98.968	98.968	98.968	93.068	97.198	99.263	99.115		98.378	98.673	94.395	88.84	88.84	86.637	90.441	90.441	90.441	92.217	91.777	91.777	91.63	91.043	91.189	91.189	91.043	89.868	84.454	90.162	90.602	89.06	90.265	90.308
KX252787 ck/CH/LLN/131040/16/ China	87.701	89.427	94.838	91.483	91.189	89.134	96.608	98.23	96.903	97.493	99.115	98.673	99.115	98.82	98.82	99.41	99.41	99.41	99.41	99.115	93.215	96.755	98.82	98.673	98.378		98.23	93.953	88.693	88.399	86.197	90.147	90.147	90.147	91.63	91.189	91.189	91.043	90.749	90.602	90.896	90.749	89.574	83.894	89.574	90.015	88.473	89.676	90.015
KX252785 ck/CH/LSD/100311/16 China	87.994	89.427	93.953	91.483	90.602	89.134	96.608	98.525	97.198	97.493	99.115	98.673	99.115	99.115	98.525	98.82	98.82	98.82	98.82	98.82	92.625	96.755	99.115	98.673	98.673	98.23		93.953	88.106	88.399	86.05	90	90	90	91.336	90.896	90.896	90.749	90.162	90.308	90.896	90.162	89.134	83.613	89.28	89.721	88.179	89.823	89.427
KY407556 gCoV/ck/Chi/I0114/14 China	87.555	93.245	92.625	90.162	91.189	93.539	93.068	94.1	95.575	96.165	94.543	94.1	94.543	94.543	94.838	94.248	94.248	94.248	94.248	94.248	93.953	93.363	94.69	94.543	94.395	93.953	93.953		89.28	94.126	87.078	89.706	89.706	89.706	89.721	89.28	89.28	89.134	90.308	90.749	88.987	90.455	90.015	84.734	89.868	89.721	89.06	89.676	89.868
MK618759 K047-12/12 Korea	88.158	91.924	89.134	91.63	91.63	92.217	88.987	88.399	88.106	88.693	88.987	88.546	88.987	88.987	89.28	88.987	88.987	88.987	88.987	88.987	89.721	89.721	88.693	89.134	88.84	88.693	88.106	89.28		89.868	89.574	89.574	89.574	89.574	91.483	91.043	91.043	90.896	92.364	92.07	91.336	91.483	92.07	86.275	90.602	91.043	91.116	89.28	91.336
HM245924 CQ04-1/04 China	88.546	94.42	87.812	89.868	90.455	94.42	88.693	88.987	90.015	90.602	88.987	88.84	88.987	88.987	89.28	88.693	88.693	88.693	88.693	88.693	90.162	89.427	89.134	89.134	88.84	88.399	88.399	94.126	89.868		87.812	89.134	89.134	89.134	88.987	88.546	88.546	88.399	88.693	90.015	88.546	89.868	89.721	84.034	88.987	88.399	88.767	87.959	89.28
KX252779 ck/CH/LLN/06I/16 China	86.404	89.427	87.665	89.134	88.546	89.574	86.197	86.637	86.931	86.344	86.49	86.344	86.49	86.784	86.784	86.49	86.49	86.49	86.49	86.49	88.106	87.225	86.49	86.931	86.637	86.197	86.05	87.078	89.574	87.812		88.106	88.106	88.106	88.84	88.399	88.399	88.253	88.106	89.134	88.546	89.134	88.84	84.454	87.812	87.518	88.326	88.106	88.693
MK032177 gCoV/ck/Chi/I0724/17 China	93.155	89.721	90.735	90.896	90.602	89.574	89.412	89.412	89.412	89.706	90.147	89.706	90.147	90.441	90.441	90.147	90.147	90.147	90.147	90.147	90.735	90.588	90.294	90.588	90.441	90.147	90	89.706	89.574	89.134	88.106		100	100	91.483	91.043	91.043	90.896	92.217	93.245	90.749	92.364	92.952	86.415	91.483	91.336	91.557	92.353	91.777
MK032179 gCoV/ck/Chi/I0922/17 China	93.155	89.721	90.735	90.896	90.602	89.574	89.412	89.412	89.412	89.706	90.147	89.706	90.147	90.441	90.441	90.147	90.147	90.147	90.147	90.147	90.735	90.588	90.294	90.588	90.441	90.147	90	89.706	89.574	89.134	88.106	100		100	91.483	91.043	91.043	90.896	92.217	93.245	90.749	92.364	92.952	86.415	91.483	91.336	91.557	92.353	91.777
MK032180 gCoV/ck/China/I0737/17 China	93.155	89.721	90.735	90.896	90.602	89.574	89.412	89.412	89.412	89.706	90.147	89.706	90.147	90.441	90.441	90.147	90.147	90.147	90.147	90.147	90.735	90.588	90.294	90.588	90.441	90.147	90	89.706	89.574	89.134	88.106	100	100		91.483	91.043	91.043	90.896	92.217	93.245	90.749	92.364	92.952	86.415	91.483	91.336	91.557	92.353	91.777
OM525803 D535/4/FR/05	87.288	92.149	91.336	95.154	93.539	90.896	91.63	91.336	90.308	90.896	92.217	91.777	92.217	91.924	91.924	91.924	91.924	91.924	91.924	91.924	90.896	92.511	91.924	92.217	92.217	91.63	91.336	89.721	91.483	88.987	88.84	91.483	91.483	91.483		99.614	99.614	99.485	93.694	95.495	98.713	95.238	94.08	85.854	94.466	93.436	90.969	92.278	94.466
KY933089 1148-A/field/17 UK	86.864	91.763	90.896	94.86	93.098	90.455	91.189	90.896	89.868	90.455	91.777	91.336	91.777	91.483	91.483	91.483	91.483	91.483	91.483	91.483	90.455	92.07	91.483	91.777	91.777	91.189	90.896	89.28	91.043	88.546	88.399	91.043	91.043	91.043	99.614		100	99.871	93.308	95.109	98.327	94.852	93.694	85.434	94.08	93.05	90.529	91.892	94.08
MN548289 QX UK	86.864	91.763	90.896	94.86	93.098	90.455	91.189	90.896	89.868	90.455	91.777	91.336	91.777	91.483	91.483	91.483	91.483	91.483	91.483	91.483	90.455	92.07	91.483	91.777	91.777	91.189	90.896	89.28	91.043	88.546	88.399	91.043	91.043	91.043	99.614	100		99.871	93.308	95.109	98.327	94.852	93.694	85.434	94.08	93.05	90.529	91.892	94.08
KY933090 L1148/vaccine/17 UK	86.723	91.634	90.749	94.714	92.952	90.308	91.043	90.749	89.721	90.308	91.63	91.189	91.63	91.336	91.336	91.336	91.336	91.336	91.336	91.336	90.308	91.924	91.336	91.63	91.63	91.043	90.749	89.134	90.896	88.399	88.253	90.896	90.896	90.896	99.485	99.871	99.871		93.179	94.981	98.198	94.723	93.565	85.294	93.951	92.921	90.382	91.763	93.951
MK581205 gCoV/Ck/Pol/548/04 Poland	87.853	91.892	91.043	92.364	92.07	91.189	90.162	90.162	89.868	90.455	91.043	90.602	91.043	91.043	91.189	91.043	91.043	91.043	91.043	91.043	90.455	91.189	90.749	91.336	91.043	90.749	90.162	90.308	92.364	88.693	88.106	92.217	92.217	92.217	93.694	93.308	93.308	93.179		94.852	92.921	95.238	94.208	88.235	93.694	98.327	93.465	93.179	94.852
OM525806 D722/SK/06	88.701	92.921	91.043	93.539	92.511	92.217	90.308	90.308	90.896	90.455	90.896	90.455	90.896	91.189	91.189	90.896	90.896	90.896	90.896	90.896	91.043	91.483	90.896	91.483	91.189	90.602	90.308	90.749	92.07	90.015	89.134	93.245	93.245	93.245	95.495	95.109	95.109	94.981	94.852		94.723	96.268	95.238	88.375	95.367	94.208	93.612	92.664	96.01
OM525804 D591/2/GR/05	87.147	91.377	90.602	94.42	92.805	90.455	91.189	90.896	89.574	90.162	91.483	91.189	91.483	91.189	91.189	91.189	91.189	91.189	91.189	91.189	90.455	92.07	91.189	91.189	91.189	90.896	90.896	88.987	91.336	88.546	88.546	90.749	90.749	90.749	98.713	98.327	98.327	98.198	92.921	94.723		94.723	94.08	85.994	94.208	92.664	91.116	92.021	94.208
KX272465 AR251-15/14 Sudan	89.124	92.149	92.07	93.833	93.539	91.336	90.455	90.455	90.455	90.749	91.043	90.749	91.043	91.043	91.189	91.043	91.043	91.043	91.043	91.043	90.602	91.483	90.749	91.336	91.043	90.749	90.162	90.455	91.483	89.868	89.134	92.364	92.364	92.364	95.238	94.852	94.852	94.723	95.238	96.268	94.723		95.753	88.515	96.268	94.595	93.759	94.208	98.456
FN430414 ITA/90254/05 Italy	88.842	92.664	90.896	92.07	92.658	91.924	90.015	88.987	89.134	89.28	89.868	89.574	89.868	89.868	90.015	89.868	89.868	89.868	89.868	89.868	90.602	90.308	89.574	90.015	89.868	89.574	89.134	90.015	92.07	89.721	88.84	92.952	92.952	92.952	94.08	93.694	93.694	93.565	94.208	95.238	94.08	95.753		87.815	96.911	93.565	93.025	93.565	95.238
JQ088078 CK/SWE/065/8946/10 Sweden	85.635	85.294	84.594	85.714	85.294	85.294	83.754	83.333	83.894	83.613	84.174	84.174	84.174	84.454	84.454	84.174	84.174	84.174	84.174	84.174	84.594	84.734	84.174	84.594	84.454	83.894	83.613	84.734	86.275	84.034	84.454	86.415	86.415	86.415	85.854	85.434	85.434	85.294	88.235	88.375	85.994	88.515	87.815		87.535	87.395	93.207	87.815	88.655
KT886454 gCoV/Ck/Pol/74/09 Poland	88.842	91.892	90.896	92.364	92.511	91.189	90.015	89.28	89.721	89.574	90.162	90.162	90.162	90.162	90.308	89.868	89.868	89.868	89.868	90.162	89.721	90.162	89.868	90.162	90.162	89.574	89.28	89.868	90.602	88.987	87.812	91.483	91.483	91.483	94.466	94.08	94.08	93.951	93.694	95.367	94.208	96.268	96.911	87.535		93.565	92.438	93.308	95.495
MK581206 gCoV/Ck/Pol/195/12 Poland	86.723	91.763	90.455	92.217	91.63	90.602	89.868	89.721	89.427	90.015	90.602	90.455	90.602	90.602	90.896	90.308	90.308	90.308	90.308	90.308	89.574	90.749	90.308	90.602	90.602	90.015	89.721	89.721	91.043	88.399	87.518	91.336	91.336	91.336	93.436	93.05	93.05	92.921	98.327	94.208	92.664	94.595	93.565	87.395	93.565		92.584	92.793	94.466
OM525805 D683/HU/06	91.009	90.088	89.207	90.529	90.088	89.794	88.326	87.885	88.179	88.179	88.767	88.767	88.767	89.06	89.06	88.767	88.767	88.767	88.767	88.767	89.06	89.354	88.767	89.207	89.06	88.473	88.179	89.06	91.116	88.767	88.326	91.557	91.557	91.557	90.969	90.529	90.529	90.382	93.465	93.612	91.116	93.759	93.025	93.207	92.438	92.584		92.584	93.906
KX236001 ck/CH/LSD/03I/16 China	88.402	90.605	90.265	90.749	90.602	89.134	90.118	89.676	89.676	89.971	90.56	90.56	90.56	90.56	90.413	90.265	90.265	90.265	90.265	90.265	90.413	90.708	90.265	90.56	90.265	89.676	89.823	89.676	89.28	87.959	88.106	92.353	92.353	92.353	92.278	91.892	91.892	91.763	93.179	92.664	92.021	94.208	93.565	87.815	93.308	92.793	92.584		93.308
KP662631 ck/ZA/3665/11 South Africa	88.701	91.377	91.043	93.245	92.952	90.896	89.868	89.721	90.015	90.015	90.308	90.015	90.308	90.308	90.602	90.308	90.308	90.308	90.308	90.308	90.015	90.896	90.015	90.602	90.308	90.015	89.427	89.868	91.336	89.28	88.693	91.777	91.777	91.777	94.466	94.08	94.08	93.951	94.852	96.01	94.208	98.456	95.238	88.655	95.495	94.466	93.906	93.308
KF377577 4/91 vaccine China	93.155	89.721	90.735	90.896	90.602	89.574	89.412	89.412	89.412	89.706	90.147	89.706	90.147	90.441	90.441	90.147	90.147	90.147	90.147	90.147	90.735	90.588	90.294	90.588	90.441	90.147	90	89.706	89.574	89.134	88.106	100	100	100	91.483	91.043	91.043	90.896	92.217	93.245	90.749	92.364	92.952	86.415	91.483	91.336	91.557	92.353	91.777
KP118881 ck/CH/LBJ/140413/14 China	93.155	89.721	90.735	90.896	90.602	89.574	89.412	89.412	89.412	89.706	90.147	89.706	90.147	90.441	90.441	90.147	90.147	90.147	90.147	90.147	90.735	90.588	90.294	90.588	90.441	90.147	90	89.706	89.574	89.134	88.106	100	100	100	91.483	91.043	91.043	90.896	92.217	93.245	90.749	92.364	92.952	86.415	91.483	91.336	91.557	92.353	91.777
KP118880 ck/CH/LHB/130927/14 China	93.155	89.721	90.735	90.896	90.602	89.574	89.412	89.412	89.412	89.706	90.147	89.706	90.147	90.441	90.441	90.147	90.147	90.147	90.147	90.147	90.735	90.588	90.294	90.588	90.441	90.147	90	89.706	89.574	89.134	88.106	100	100	100	91.483	91.043	91.043	90.896	92.217	93.245	90.749	92.364	92.952	86.415	91.483	91.336	91.557	92.353	91.777
KP118888 ck/CH/LLN/130102/15 China	93.155	89.721	90.735	90.896	90.602	89.574	89.412	89.412	89.412	89.706	90.147	89.706	90.147	90.441	90.441	90.147	90.147	90.147	90.147	90.147	90.735	90.588	90.294	90.588	90.441	90.147	90	89.706	89.574	89.134	88.106	100	100	100	91.483	91.043	91.043	90.896	92.217	93.245	90.749	92.364	92.952	86.415	91.483	91.336	91.557	92.353	91.777
MZ367369 IBV/Ck/Bel/4134_001/19 Belgium	93.155	89.721	90.735	90.896	90.602	89.574	89.412	89.412	89.412	89.706	90.147	89.706	90.147	90.441	90.441	90.147	90.147	90.147	90.147	90.147	90.735	90.588	90.294	90.588	90.441	90.147	90	89.706	89.574	89.134	88.106	100	100	100	91.483	91.043	91.043	90.896	92.217	93.245	90.749	92.364	92.952	86.415	91.483	91.336	91.557	92.353	91.777
KP118884 ck/CH/LSD/110651/15 China	93.155	89.721	90.735	90.896	90.602	89.574	89.412	89.412	89.412	89.706	90.147	89.706	90.147	90.441	90.441	90.147	90.147	90.147	90.147	90.147	90.735	90.588	90.294	90.588	90.441	90.147	90	89.706	89.574	89.134	88.106	100	100	100	91.483	91.043	91.043	90.896	92.217	93.245	90.749	92.364	92.952	86.415	91.483	91.336	91.557	92.353	91.777
KP118882 ck/CH/LBJ/140402/14 China	93.155	89.721	90.735	90.896	90.602	89.574	89.412	89.412	89.412	89.706	90.147	89.706	90.147	90.441	90.441	90.147	90.147	90.147	90.147	90.147	90.735	90.588	90.294	90.588	90.441	90.147	90	89.706	89.574	89.134	88.106	100	100	100	91.483	91.043	91.043	90.896	92.217	93.245	90.749	92.364	92.952	86.415	91.483	91.336	91.557	92.353	91.777
KP118892 ck/CH/LLN/120101 China	89.732	86.344	87.353	87.518	87.225	86.197	86.029	86.029	86.029	86.324	86.765	86.324	86.765	87.059	87.059	86.765	86.765	86.765	86.765	86.765	87.353	87.353	86.912	87.206	87.059	86.765	86.618	86.324	86.197	85.756	84.875	96.413	96.413	96.413	88.106	87.665	87.665	87.518	88.84	89.868	87.372	88.987	89.868	83.333	88.399	88.399	88.326	88.971	88.399
KP118891 ck/CH/LHLJ/111246/14 China	93.155	89.721	90.735	90.896	90.602	89.574	89.412	89.412	89.412	89.706	90.147	89.706	90.147	90.441	90.441	90.147	90.147	90.147	90.147	90.147	90.735	90.588	90.294	90.588	90.441	90.147	90	89.706	89.574	89.134	88.106	100	100	100	91.483	91.043	91.043	90.896	92.217	93.245	90.749	92.364	92.952	86.415	91.483	91.336	91.557	92.353	91.777
KP118893 ck/CH/LSD/110410/14 China	93.155	89.721	90.735	90.896	90.602	89.574	89.412	89.412	89.412	89.706	90.147	89.706	90.147	90.441	90.441	90.147	90.147	90.147	90.147	90.147	90.735	90.588	90.294	90.588	90.441	90.147	90	89.706	89.574	89.134	88.106	100	100	100	91.483	91.043	91.043	90.896	92.217	93.245	90.749	92.364	92.952	86.415	91.483	91.336	91.557	92.353	91.777
KP036503 ck/CH/LHB/121010 China	93.155	89.721	90.735	90.896	90.602	89.574	89.412	89.412	89.412	89.706	90.147	89.706	90.147	90.441	90.441	90.147	90.147	90.147	90.147	90.147	90.735	90.588	90.294	90.588	90.441	90.147	90	89.706	89.574	89.134	88.106	100	100	100	91.483	91.043	91.043	90.896	92.217	93.245	90.749	92.364	92.952	86.415	91.483	91.336	91.557	92.353	91.777
KP036504 ck/CH/LHB/130630 China	93.155	89.721	90.735	90.896	90.602	89.574	89.412	89.412	89.412	89.706	90.147	89.706	90.147	90.441	90.441	90.147	90.147	90.147	90.147	90.147	90.735	90.588	90.294	90.588	90.441	90.147	90	89.706	89.574	89.134	88.106	100	100	100	91.483	91.043	91.043	90.896	92.217	93.245	90.749	92.364	92.952	86.415	91.483	91.336	91.557	92.353	91.777
KP118883 ck/CH/LHB/121041 China	93.155	89.721	90.735	90.896	90.602	89.574	89.412	89.412	89.412	89.706	90.147	89.706	90.147	90.441	90.441	90.147	90.147	90.147	90.147	90.147	90.735	90.588	90.294	90.588	90.441	90.147	90	89.706	89.574	89.134	88.106	100	100	100	91.483	91.043	91.043	90.896	92.217	93.245	90.749	92.364	92.952	86.415	91.483	91.336	91.557	92.353	91.777
KP118887 ck/CH/LHB/140532/14 China	93.155	89.721	90.735	90.896	90.602	89.574	89.412	89.412	89.412	89.706	90.147	89.706	90.147	90.441	90.441	90.147	90.147	90.147	90.147	90.147	90.735	90.588	90.294	90.588	90.441	90.147	90	89.706	89.574	89.134	88.106	100	100	100	91.483	91.043	91.043	90.896	92.217	93.245	90.749	92.364	92.952	86.415	91.483	91.336	91.557	92.353	91.777
KP118885 ck/CH/LSD/110857/14 China	93.155	89.721	90.735	90.896	90.602	89.574	89.412	89.412	89.412	89.706	90.147	89.706	90.147	90.441	90.441	90.147	90.147	90.147	90.147	90.147	90.735	90.588	90.294	90.588	90.441	90.147	90	89.706	89.574	89.134	88.106	100	100	100	91.483	91.043	91.043	90.896	92.217	93.245	90.749	92.364	92.952	86.415	91.483	91.336	91.557	92.353	91.777
KP036502 ck/CH/LHLJ/140906 China	93.006	89.574	90.588	90.749	90.455	89.427	89.265	89.265	89.265	89.559	90	89.559	90	90.294	90.294	90	90	90	90	90	90.588	90.441	90.147	90.441	90.294	90	89.853	89.559	89.427	88.987	87.959	99.851	99.851	99.851	91.336	90.896	90.896	90.749	92.07	93.245	90.602	92.217	92.805	86.555	91.336	91.189	91.703	92.5	91.63
KJ135013 IBVUkr27/11 Ukraine	90.511	86.667	88.382	89.574	89.28	89.134	87.647	87.5	87.5	88.088	88.235	87.794	88.235	88.529	88.529	88.235	88.235	88.235	88.235	88.235	88.824	88.824	88.382	88.676	88.529	88.529	87.794	88.676	88.84	88.987	88.253	94.768	94.768	94.768	87.518	87.092	87.092	86.95	89.645	89.362	87.092	89.22	88.652	87.535	88.085	88.794	92.144	88.636	88.936
KJ425496 ck/CH/LHB/130573 China	88.235	91.642	90.602	89.443	89.736	91.642	91.336	90.455	90.602	91.777	90.896	90.602	90.896	90.602	90.896	90.602	90.602	90.602	90.602	90.602	97.357	92.952	90.749	90.896	90.749	90.602	90.308	92.952	87.83	90.162	86.364	89.381	89.381	89.381	89.003	88.563	88.563	88.416	88.856	89.15	88.856	88.856	88.71	83.217	88.123	88.27	87.463	88.399	88.27
KP343691 ck/CH/LGX/130530 China	88.235	91.642	90.602	89.443	89.736	91.642	91.336	90.455	90.602	91.777	90.896	90.602	90.896	90.602	90.896	90.602	90.602	90.602	90.602	90.602	97.357	92.952	90.749	90.896	90.749	90.602	90.308	92.952	87.83	90.162	86.364	89.381	89.381	89.381	89.003	88.563	88.563	88.416	88.856	89.15	88.856	88.856	88.71	83.217	88.123	88.27	87.463	88.399	88.27
KT736032 ck/CHLDL150434-II/16 China	88.088	91.496	90.455	89.296	89.589	91.496	91.189	90.308	90.455	91.63	90.749	90.455	90.749	90.455	90.749	90.455	90.455	90.455	90.455	90.455	97.21	92.805	90.602	90.749	90.602	90.455	90.162	92.805	87.977	90.015	86.364	89.233	89.233	89.233	89.15	88.71	88.71	88.563	89.003	89.003	89.003	88.71	88.563	83.077	87.977	88.416	87.317	88.253	88.123
KU356856 ck/CH/SCYB/140913/25 China	88.235	91.642	90.602	89.443	89.736	91.642	91.336	90.455	90.602	91.777	90.896	90.602	90.896	90.602	90.896	90.602	90.602	90.602	90.602	90.602	97.357	92.952	90.749	90.896	90.749	90.602	90.308	92.952	87.83	90.162	86.364	89.381	89.381	89.381	89.003	88.563	88.563	88.416	88.856	89.15	88.856	88.856	88.71	83.217	88.123	88.27	87.463	88.399	88.27
MT505388 CK/CH/SCMY/160315/20 China	89.793	85.39	86.745	90.015	88.546	87.078	88.66	87.187	86.451	86.598	87.776	87.776	87.776	87.776	87.776	87.482	87.482	87.482	87.482	87.482	88.071	89.102	87.776	88.071	88.218	87.482	87.187	86.009	87.665	86.784	86.197	91.031	91.031	91.031	88.652	88.227	88.227	88.085	86.241	86.383	88.369	86.241	86.099	83.894	85.532	86.241	88.913	87.055	86.099
KJ425497 ck/CH/LHB/130598/14 China	91.324	89.296	89.427	90.469	89.736	89.003	89.28	88.546	88.84	88.84	89.427	89.427	89.427	89.721	89.574	89.134	89.134	89.134	89.134	89.134	89.574	90.308	89.427	89.721	89.721	88.84	88.987	88.987	89.443	88.106	88.71	92.773	92.773	92.773	90.909	90.469	90.469	90.323	92.229	92.229	91.056	92.375	92.082	87.972	91.789	91.642	92.595	97.504	91.789
FN430415 NGA/A116E7/06 Nigeria	90.429	80.12	84.466	85.437	87.379	85.761	83.172	81.877	82.524	82.848	82.848	82.524	82.848	82.848	82.848	82.524	82.524	82.524	82.524	82.848	84.466	85.761	82.848	83.172	82.848	82.201	82.524	84.466	84.142	85.113	79.288	90	90	90	80.723	80.422	80.422	80.422	82.53	82.229	80.723	83.735	83.434	78.947	82.831	82.53	88.835	80.422	83.133
KR231009 B1648/84 Belgium	91.777	85.816	87.812	89.427	89.427	88.84	87.665	88.253	88.399	88.253	88.546	88.253	88.546	88.546	88.693	88.253	88.253	88.253	88.253	88.253	88.106	88.546	88.253	88.399	88.253	87.959	87.812	88.253	88.84	88.106	89.28	90.708	90.708	90.708	87.092	86.667	86.667	86.525	88.369	88.511	87.234	89.362	88.936	87.955	88.369	87.518	92.584	89.504	88.936
MN548285 CR88 (4/91)/88 France	90.896	85.674	87.812	89.427	89.134	88.546	87.518	87.665	87.225	87.665	88.253	87.812	88.253	88.253	88.399	88.253	88.253	88.253	88.253	88.253	88.399	88.546	87.959	88.399	88.253	88.546	87.518	87.959	88.253	87.665	88.253	91.003	91.003	91.003	86.525	86.099	86.099	85.957	89.504	87.801	85.816	89.078	88.652	86.835	87.518	88.369	91.263	87.66	88.369
MN548288 Italy02/02 Italy	91.813	86.383	89.574	90.455	90.162	89.427	88.987	88.84	88.253	88.546	89.427	89.134	89.427	89.427	89.721	89.427	89.427	89.427	89.427	89.427	89.574	89.427	89.134	89.427	89.427	89.134	88.693	88.987	90.015	88.253	89.28	91.458	91.458	91.458	87.66	87.234	87.234	87.092	88.794	89.078	87.801	90.071	90.496	88.235	89.929	87.943	92.584	88.936	89.929
MG021194 gCoV/Ck/IT/624I/96 Italy	90.643	85.816	87.812	89.28	88.253	88.546	87.372	87.078	87.225	87.078	87.665	87.665	87.665	87.959	87.812	87.665	87.665	87.665	87.665	87.665	88.693	88.399	87.665	88.106	87.959	87.372	87.518	87.959	89.427	88.399	89.721	90.574	90.574	90.574	86.383	85.957	85.957	85.816	88.369	88.511	86.525	88.085	89.362	88.375	87.518	87.234	92.731	88.369	87.66
KU900739 QIA-03342/03 Korea	87.853	92.664	90.455	93.245	92.217	91.777	90.308	90.308	89.721	90.308	90.602	90.162	90.602	90.308	90.602	90.602	90.602	90.602	90.602	90.602	91.336	90.896	90.308	90.896	90.602	90.308	90.015	90.602	93.098	89.868	89.427	91.924	91.924	91.924	97.812	97.426	97.426	97.297	93.694	96.139	97.555	94.981	95.109	87.115	94.337	93.05	92.291	92.021	94.852
KU900744 QIA-Q43/06 Korea	87.712	92.535	90.308	93.098	92.07	91.63	89.868	90.162	89.574	90.162	90.455	90.015	90.455	90.162	90.455	90.455	90.455	90.455	90.455	90.455	91.189	90.749	90.162	90.749	90.455	90.162	89.868	90.455	92.952	89.721	89.28	91.777	91.777	91.777	97.426	97.04	97.04	96.911	93.565	96.01	97.169	94.852	94.981	86.975	94.208	92.921	92.144	91.892	94.723
KJ425504 ck/CH/LHJL/091205 China	90.19	90.162	90.265	91.043	90.162	89.427	89.676	89.086	88.643	88.791	89.971	89.823	89.971	89.971	90.265	89.971	89.971	89.971	89.971	89.971	91.003	90.708	89.676	89.971	89.676	89.676	89.233	89.676	89.28	87.959	88.546	91.618	91.618	91.618	91.336	90.896	90.896	90.749	92.07	91.63	90.896	92.364	93.245	86.835	91.336	91.777	91.557	96.903	92.07
MH539771 IBV/SES/15AB-01 Canada	90.19	90.162	90.265	91.043	90.162	89.427	89.676	89.086	88.643	88.791	89.971	89.823	89.971	89.971	90.265	89.971	89.971	89.971	89.971	89.971	91.003	90.708	89.676	89.971	89.676	89.676	89.233	89.676	89.28	87.959	88.546	91.618	91.618	91.618	91.336	90.896	90.896	90.749	92.07	91.63	90.896	92.364	93.245	86.835	91.336	91.777	91.557	96.903	92.07
MH539772 IBV/SES/15SK-02 Canada	90.19	90.162	90.265	91.043	90.162	89.427	89.676	89.086	88.643	88.791	89.971	89.823	89.971	89.971	90.265	89.971	89.971	89.971	89.971	89.971	91.003	90.708	89.676	89.971	89.676	89.676	89.233	89.676	89.28	87.959	88.546	91.618	91.618	91.618	91.336	90.896	90.896	90.749	92.07	91.63	90.896	92.364	93.245	86.835	91.336	91.777	91.557	96.903	92.07
MK937830 M41/19 China	90.19	90.162	90.265	91.043	90.162	89.427	89.676	89.086	88.643	88.791	89.971	89.823	89.971	89.971	90.265	89.971	89.971	89.971	89.971	89.971	91.003	90.708	89.676	89.971	89.676	89.676	89.233	89.676	89.28	87.959	88.546	91.618	91.618	91.618	91.336	90.896	90.896	90.749	92.07	91.63	90.896	92.364	93.245	86.835	91.336	91.777	91.557	96.903	92.07
MW446887 IBV/M41/Y192 China	90.19	90.162	90.265	91.043	90.162	89.427	89.676	89.086	88.643	88.791	89.971	89.823	89.971	89.971	90.265	89.971	89.971	89.971	89.971	89.971	91.003	90.708	89.676	89.971	89.676	89.676	89.233	89.676	89.28	87.959	88.546	91.618	91.618	91.618	91.336	90.896	90.896	90.749	92.07	91.63	90.896	92.364	93.245	86.835	91.336	91.777	91.557	96.903	92.07
MW429061 IBV/M41/Y28 China	90.19	90.162	90.265	91.043	90.162	89.427	89.676	89.086	88.643	88.791	89.971	89.823	89.971	89.971	90.265	89.971	89.971	89.971	89.971	89.971	91.003	90.708	89.676	89.971	89.676	89.676	89.233	89.676	89.28	87.959	88.546	91.618	91.618	91.618	91.336	90.896	90.896	90.749	92.07	91.63	90.896	92.364	93.245	86.835	91.336	91.777	91.557	96.903	92.07
MW446888 IBV/M41/Y27 China	90.19	90.162	90.265	91.043	90.162	89.427	89.676	89.086	88.643	88.791	89.971	89.823	89.971	89.971	90.265	89.971	89.971	89.971	89.971	89.971	91.003	90.708	89.676	89.971	89.676	89.676	89.233	89.676	89.28	87.959	88.546	91.618	91.618	91.618	91.336	90.896	90.896	90.749	92.07	91.63	90.896	92.364	93.245	86.835	91.336	91.777	91.557	96.903	92.07
MW429062 IBV/M41/N56 China	90.19	90.162	90.265	91.043	90.162	89.427	89.676	89.086	88.643	88.791	89.971	89.823	89.971	89.971	90.265	89.971	89.971	89.971	89.971	89.971	91.003	90.708	89.676	89.971	89.676	89.676	89.233	89.676	89.28	87.959	88.546	91.618	91.618	91.618	91.336	90.896	90.896	90.749	92.07	91.63	90.896	92.364	93.245	86.835	91.336	91.777	91.557	96.903	92.07
MK728875 M41-CK/17 UK	90.19	90.162	90.265	91.043	90.162	89.427	89.676	89.086	88.643	88.791	89.971	89.823	89.971	89.971	90.265	89.971	89.971	89.971	89.971	89.971	91.003	90.708	89.676	89.971	89.676	89.676	89.233	89.676	89.28	87.959	88.546	91.618	91.618	91.618	91.336	90.896	90.896	90.749	92.07	91.63	90.896	92.364	93.245	86.835	91.336	91.777	91.557	96.903	92.07
KJ435286 ck/CH/LSD/1112150 China	90.044	90.015	90.118	90.896	90.015	89.28	89.528	88.938	88.496	88.643	89.823	89.676	89.823	89.823	90.118	89.823	89.823	89.823	89.823	89.823	90.855	90.56	89.528	89.823	89.528	89.528	89.086	89.528	89.134	87.812	88.399	91.471	91.471	91.471	91.189	90.749	90.749	90.602	91.924	91.483	90.749	92.217	93.098	86.695	91.189	91.777	91.41	96.755	91.924
KY047602 gCoV/Ck/Pol/G052/16 Poland	90.058	85.248	88.399	89.574	89.721	88.399	87.372	87.372	86.931	87.812	87.959	87.518	87.959	87.959	87.959	87.959	87.959	87.959	87.959	87.959	88.399	88.253	87.812	88.106	87.959	88.253	87.225	87.959	87.959	87.812	87.959	91.458	91.458	91.458	86.95	86.525	86.525	86.383	89.078	87.518	86.525	89.078	87.66	87.115	87.66	88.369	91.41	87.943	88.227
MK581207 gCoV/Ck/Pol/G103/16 Poland	90.058	85.248	88.399	89.574	89.721	88.399	87.372	87.372	86.931	87.812	87.959	87.518	87.959	87.959	87.959	87.959	87.959	87.959	87.959	87.959	88.399	88.253	87.812	88.106	87.959	88.253	87.225	87.959	87.959	87.812	87.959	91.458	91.458	91.458	86.95	86.525	86.525	86.383	89.078	87.518	86.525	89.078	87.66	87.115	87.66	88.369	91.41	87.943	88.227
MK581208 gCoV/Ck/Pol/G225/17 Poland	90.205	85.39	87.518	89.574	89.427	88.546	87.518	87.078	86.784	87.372	87.665	87.225	87.665	87.959	87.959	87.372	87.372	87.372	87.372	87.372	88.399	88.253	87.665	87.812	87.959	87.665	87.225	88.106	87.665	87.959	88.106	91.458	91.458	91.458	86.667	86.241	86.241	86.099	88.936	87.801	86.241	88.511	87.234	87.115	87.66	88.652	91.41	87.801	87.801
MK581202 gCoV/Ck/Pol/80/89 Poland	88.348	86.784	87.758	88.253	88.106	86.784	87.611	87.021	87.021	87.021	87.758	87.611	87.758	87.758	88.053	87.758	87.758	87.758	87.758	87.758	88.053	87.758	87.463	88.053	87.758	87.463	87.316	87.168	85.903	85.903	86.49	89.778	89.778	89.778	88.106	87.665	87.665	87.518	89.427	88.693	87.959	90.015	89.427	85.854	88.693	90.015	89.941	89.971	90.162
MK581203 gCoV/Ck/Pol/162/97 Poland	90.643	88.27	88.088	89.721	88.84	88.106	88.088	87.941	88.235	87.941	88.529	88.529	88.529	88.529	88.676	88.529	88.529	88.529	88.529	88.529	87.794	88.824	88.235	88.676	88.529	88.235	87.794	87.5	88.546	87.812	88.987	91.029	91.029	91.029	89.883	89.443	89.443	89.296	92.229	91.496	89.736	92.669	91.202	89.076	90.616	91.349	94.2	91.777	92.375
MK581204 gCoV/Ck/Pol/255/97 Poland	91.003	88.987	89.381	89.721	89.868	88.987	88.348	88.643	88.201	88.643	89.233	88.791	89.233	89.233	89.233	89.233	89.233	89.233	89.233	89.233	90.118	89.823	88.938	89.528	89.233	88.938	88.643	89.233	88.987	88.399	87.812	92.593	92.593	92.593	91.189	90.749	90.749	90.602	90.896	91.483	90.602	92.364	92.511	86.415	91.924	89.868	90.822	91.003	91.63
MT591566 CK/DE/IB80/16 Germany	91.52	85.816	89.134	90.455	89.868	88.399	88.106	87.812	88.253	87.959	88.399	88.399	88.399	88.693	88.546	88.399	88.399	88.399	88.399	88.399	88.693	88.84	88.546	88.84	88.693	88.399	88.546	87.812	88.987	88.106	90.015	93.962	93.962	93.962	87.801	87.376	87.376	87.234	88.085	89.362	87.943	89.929	89.504	86.695	88.085	87.234	91.41	89.078	88.936
MN987231 IBV/ck/EGY-Monuf/USC-3/13 Egypt	90.205	85.532	88.546	89.721	89.28	88.399	87.959	88.253	87.959	88.106	88.546	88.106	88.546	88.546	88.693	88.546	88.546	88.546	88.546	88.546	87.812	88.546	88.253	88.693	88.546	88.253	87.812	88.106	88.693	88.106	88.84	90.427	90.427	90.427	86.809	86.383	86.383	86.241	88.936	88.511	85.957	90.355	88.227	87.955	87.66	87.801	92.291	88.227	89.645
KR608272 LDT3-A/03 China	87.408	92.07	91.445	90.162	90.162	91.777	92.183	91.298	91.445	92.625	91.74	91.74	91.74	91.445	91.74	91.445	91.445	91.445	91.445	91.445	97.935	93.805	91.593	91.74	91.593	91.445	91.15	93.51	87.959	90.015	86.49	88.824	88.824	88.824	89.427	88.987	88.987	88.84	88.987	89.28	89.28	89.28	88.84	83.333	88.253	88.987	87.739	89.233	88.693
MK574042 ck/CH/LHB/110615/19 China	85.526	89.427	87.225	88.987	88.546	89.721	87.665	87.518	87.518	87.518	87.959	87.812	87.959	87.665	88.253	87.665	87.665	87.665	87.665	87.665	88.987	88.399	87.665	87.812	87.812	87.372	87.225	88.399	89.28	89.134	96.329	87.078	87.078	87.078	88.253	87.812	87.812	87.665	87.372	87.518	87.959	88.253	88.399	83.613	87.518	86.931	87.151	87.518	87.812
MK574043 ck/CH/LHB/110627/19 China	85.673	89.574	87.372	89.134	88.399	89.868	87.518	87.372	87.372	87.372	87.812	87.665	87.812	87.518	88.106	87.518	87.518	87.518	87.518	87.518	89.134	88.253	87.518	87.665	87.665	87.225	87.078	88.253	89.134	88.987	96.476	87.225	87.225	87.225	88.106	87.665	87.665	87.518	87.518	87.665	87.812	88.399	88.546	83.754	87.665	87.078	87.298	87.665	87.959
MN548286 D1466/84 UK	92.217	86.099	88.546	90.308	90.455	88.987	88.399	88.106	88.253	88.106	88.693	88.399	88.693	88.693	88.84	88.399	88.399	88.399	88.399	88.399	88.84	89.134	88.399	88.546	88.693	88.106	87.959	88.106	89.134	87.959	89.28	91.864	91.864	91.864	88.085	87.66	87.66	87.518	89.22	89.078	88.227	89.929	89.645	88.095	89.504	88.369	92.438	90.213	89.362
[truncated: 52 more columns]

## Sheet: 5a
Table S1h. Nucleotide identities between sequences in the QX dataset (n=101). Gene 5a.
	KR822424 TCoV/080385d/08 France	OM525802 D532/9/CH/05	KX219797 ck/CH/LXJ/02I/16 China	KX252772 ck/CH/LSHH/03II/16 China	KX252778 ck/CH/LJL/05I/16 China	HQ848267 GX-YL5/05 China	KF411041 CK/CH/LGX/091109/13 China	KP118886 ck/CH/LSD/111235/14 China	KX185058 ck/CH/LGS/08I/16 China	KX219791 ck/CH/LHLJ/07I/16 China	KX219792 ck/CH/LGS/06I/16 China	KX375805 ck/CH/LJS/07V/16 China	KX252789 ck/CH/LHLJ/090605/16 China	KX252777 ck/CH/LSD/07I/16 China	KX364293 ck/CH/LJL/07III/16 China	KX219794 ck/CH/LJS/101109/16 China	KX236009 ck/CH/LSX/130132/16 China	KX259250 ck/CH/LJS/101113/16 China	KX302862 ck/CH/LJS/101111/16 China	KX364299 ck/CH/LSD/101223/16 China	KX236007 ck/CH/LSD/100408/16 China	KX219801 ck/CH/LSD/120437/16 China	MK032181 gCoV/ck/Chi/I0347/11 China	KX275391 ck/CH/LHLJ/140927/16 China	KX219800 ck/CH/LSD/130611/16 China	KX252787 ck/CH/LLN/131040/16/ China	KX252785 ck/CH/LSD/100311/16 China	KY407556 gCoV/ck/Chi/I0114/14 China	MK618759 K047-12/12 Korea	HM245924 CQ04-1/04 China	KX252779 ck/CH/LLN/06I/16 China	MK032177 gCoV/ck/Chi/I0724/17 China	MK032179 gCoV/ck/Chi/I0922/17 China	MK032180 gCoV/ck/China/I0737/17 China	OM525803 D535/4/FR/05	KY933089 1148-A/field/17 UK	MN548289 QX UK	KY933090 L1148/vaccine/17 UK	MK581205 gCoV/Ck/Pol/548/04 Poland	OM525806 D722/SK/06	OM525804 D591/2/GR/05	KX272465 AR251-15/14 Sudan	FN430414 ITA/90254/05 Italy	JQ088078 CK/SWE/065/8946/10 Sweden	KT886454 gCoV/Ck/Pol/74/09 Poland	MK581206 gCoV/Ck/Pol/195/12 Poland	OM525805 D683/HU/06	KX236001 ck/CH/LSD/03I/16 China	KP662631 ck/ZA/3665/11 South Africa
KR822424 TCoV/080385d/08 France	86.364	82.828	87.879	85.354	84.848	84.343	87.879	86.364	85.354	86.364	86.364	84.848	85.354	84.848	88.384	88.384	88.384	88.384	88.384	84.848	84.848	85.354	84.848	84.848	84.848	86.869	83.838	87.374	85.354	87.374	88.384	88.384	88.384	88.889	88.889	88.889	89.394	92.424	87.374	92.929	88.384	89.394	91.414	93.434	92.424	87.374	93.434	91.919	88.384
OM525802 D532/9/CH/05	86.364		93.434	87.879	97.98	97.475	92.929	83.838	95.96	97.98	93.939	93.939	82.828	83.333	82.828	91.414	91.414	91.414	91.414	91.414	96.465	82.323	83.333	82.323	96.465	97.475	83.838	93.939	84.343	97.98	86.364	91.414	91.414	91.414	86.364	86.364	86.364	85.859	88.889	91.919	90.909	91.414	91.919	90.909	88.889	86.869	90.404	86.869	91.414
KX219797 ck/CH/LXJ/02I/16 China	82.828	93.434		90.404	92.929	92.424	94.949	85.354	93.939	92.929	91.414	91.414	85.859	86.364	86.869	87.374	87.374	87.374	87.374	87.374	92.424	83.838	86.364	85.354	92.929	92.929	87.374	91.414	84.848	92.929	87.374	87.374	87.374	87.374	85.859	85.859	85.859	86.364	85.859	86.869	87.879	87.374	87.879	86.364	85.354	81.818	86.364	82.828	87.374
KX252772 ck/CH/LSHH/03II/16 China	87.879	87.879	90.404		87.374	86.869	88.889	87.374	88.889	87.374	86.869	86.869	86.869	87.374	87.879	88.889	88.889	88.889	88.889	88.889	86.869	84.848	88.384	86.364	87.374	87.374	88.384	85.354	86.869	87.374	95.96	88.889	88.889	88.889	87.879	87.879	87.879	88.384	88.384	88.384	88.889	88.889	89.899	89.899	87.374	87.374	87.879	88.384	87.374
KX252778 ck/CH/LJL/05I/16 China	85.354	97.98	92.929	87.374		99.495	92.929	83.838	95.455	99.495	93.939	93.939	83.333	83.838	83.333	90.404	90.404	90.404	90.404	90.404	98.485	82.323	83.333	82.828	96.465	97.475	83.838	94.949	84.343	100	86.364	90.404	90.404	90.404	85.354	85.354	85.354	84.848	87.879	90.909	89.899	90.404	90.909	89.899	87.879	85.859	90.404	86.869	90.404
HQ848267 GX-YL5/05 China	84.848	97.475	92.424	86.869	99.495		92.424	83.333	94.949	98.99	93.434	93.434	82.828	83.333	82.828	89.899	89.899	89.899	89.899	89.899	97.98	81.818	82.828	82.323	95.96	96.97	83.333	94.444	83.838	99.495	85.859	89.899	89.899	89.899	84.848	84.848	84.848	84.343	87.374	90.404	89.394	89.899	90.404	89.394	87.374	85.354	89.899	86.364	89.899
KF411041 CK/CH/LGX/091109/13 China	84.343	92.929	94.949	88.889	92.929	92.424		88.384	92.424	92.929	92.424	92.424	86.364	86.869	86.364	86.364	86.364	86.364	86.364	86.364	91.414	87.879	86.869	85.859	92.424	93.434	87.879	92.929	86.364	92.929	87.879	86.364	86.364	86.364	88.889	88.889	88.889	88.384	84.848	86.869	86.364	86.364	87.374	84.848	84.848	83.333	85.354	83.333	86.869
KP118886 ck/CH/LSD/111235/14 China	87.879	83.838	85.354	87.374	83.838	83.333	88.384		84.848	83.838	84.343	84.343	94.949	96.465	95.96	83.838	83.838	83.838	83.838	83.838	83.333	95.96	95.455	95.455	84.343	84.343	95.96	83.333	97.475	83.838	86.869	83.838	83.838	83.838	96.97	96.97	96.97	97.475	87.374	82.828	87.879	83.838	85.354	85.354	86.869	84.343	82.828	85.354	88.384
KX185058 ck/CH/LGS/08I/16 China	86.364	95.96	93.939	88.889	95.455	94.949	92.424	84.848		95.455	96.97	96.97	83.333	83.838	83.333	91.414	91.414	91.414	91.414	91.414	94.949	82.323	83.838	82.828	95.455	95.455	85.354	91.919	83.838	95.455	86.869	91.414	91.414	91.414	85.354	85.354	85.354	85.859	89.899	90.909	90.909	91.414	92.424	89.394	88.889	85.354	90.404	86.364	89.899
KX219791 ck/CH/LHLJ/07I/16 China	85.354	97.98	92.929	87.374	99.495	98.99	92.929	83.838	95.455		93.434	93.434	82.828	83.333	82.828	90.404	90.404	90.404	90.404	90.404	97.98	82.323	83.838	82.323	96.465	97.475	84.343	94.949	83.838	99.495	85.859	90.404	90.404	90.404	85.354	85.354	85.354	84.848	87.879	90.909	89.899	90.404	90.909	89.899	87.879	85.859	89.899	86.364	90.404
KX219792 ck/CH/LGS/06I/16 China	86.364	93.939	91.414	86.869	93.939	93.434	92.424	84.343	96.97	93.434		100	82.828	83.333	82.828	89.394	89.394	89.394	89.394	89.394	94.444	81.818	82.828	82.323	94.444	94.444	84.343	90.404	84.343	93.939	86.869	89.394	89.394	89.394	84.848	84.848	84.848	85.354	87.879	88.889	89.394	89.394	90.404	87.374	87.879	84.343	89.394	86.364	88.384
KX375805 ck/CH/LJS/07V/16 China	86.364	93.939	91.414	86.869	93.939	93.434	92.424	84.343	96.97	93.434	100		82.828	83.333	82.828	89.394	89.394	89.394	89.394	89.394	94.444	81.818	82.828	82.323	94.444	94.444	84.343	90.404	84.343	93.939	86.869	89.394	89.394	89.394	84.848	84.848	84.848	85.354	87.879	88.889	89.394	89.394	90.404	87.374	87.879	84.343	89.394	86.364	88.384
KX252789 ck/CH/LHLJ/090605/16 China	84.848	82.828	85.859	86.869	83.333	82.828	86.364	94.949	83.333	82.828	82.828	82.828		98.485	97.98	80.808	80.808	80.808	80.808	80.808	82.828	92.929	96.97	97.475	82.323	82.323	96.465	80.808	95.455	83.333	86.869	80.808	80.808	80.808	94.444	94.444	94.444	94.949	84.343	80.303	84.848	80.808	82.828	84.343	83.838	82.323	80.808	84.343	85.354
KX252777 ck/CH/LSD/07I/16 China	85.354	83.333	86.364	87.374	83.838	83.333	86.869	96.465	83.838	83.333	83.333	83.333	98.485		99.495	81.313	81.313	81.313	81.313	81.313	83.333	93.434	98.485	98.99	82.828	82.828	97.98	81.818	96.97	83.838	87.374	81.313	81.313	81.313	94.949	94.949	94.949	95.455	84.848	80.808	85.354	81.313	83.333	84.848	84.343	82.828	81.313	84.848	85.859
KX364293 ck/CH/LJL/07III/16 China	84.848	82.828	86.869	87.879	83.333	82.828	86.364	95.96	83.333	82.828	82.828	82.828	97.98	99.495		80.808	80.808	80.808	80.808	80.808	82.828	92.929	97.98	98.485	82.323	82.323	97.475	81.313	96.465	83.333	86.869	80.808	80.808	80.808	94.444	94.444	94.444	94.949	84.343	80.303	84.848	80.808	82.828	84.343	83.838	82.323	80.808	84.343	85.354
KX219794 ck/CH/LJS/101109/16 China	88.384	91.414	87.374	88.889	90.404	89.899	86.364	83.838	91.414	90.404	89.394	89.394	80.808	81.313	80.808		100	100	100	100	89.899	81.313	81.313	80.303	89.899	89.899	82.828	86.869	83.333	90.404	88.889	100	100	100	84.848	84.848	84.848	85.354	90.909	96.465	92.424	99.495	94.444	90.909	90.909	88.889	97.98	89.899	90.909
KX236009 ck/CH/LSX/130132/16 China	88.384	91.414	87.374	88.889	90.404	89.899	86.364	83.838	91.414	90.404	89.394	89.394	80.808	81.313	80.808	100		100	100	100	89.899	81.313	81.313	80.303	89.899	89.899	82.828	86.869	83.333	90.404	88.889	100	100	100	84.848	84.848	84.848	85.354	90.909	96.465	92.424	99.495	94.444	90.909	90.909	88.889	97.98	89.899	90.909
KX259250 ck/CH/LJS/101113/16 China	88.384	91.414	87.374	88.889	90.404	89.899	86.364	83.838	91.414	90.404	89.394	89.394	80.808	81.313	80.808	100	100		100	100	89.899	81.313	81.313	80.303	89.899	89.899	82.828	86.869	83.333	90.404	88.889	100	100	100	84.848	84.848	84.848	85.354	90.909	96.465	92.424	99.495	94.444	90.909	90.909	88.889	97.98	89.899	90.909
KX302862 ck/CH/LJS/101111/16 China	88.384	91.414	87.374	88.889	90.404	89.899	86.364	83.838	91.414	90.404	89.394	89.394	80.808	81.313	80.808	100	100	100		100	89.899	81.313	81.313	80.303	89.899	89.899	82.828	86.869	83.333	90.404	88.889	100	100	100	84.848	84.848	84.848	85.354	90.909	96.465	92.424	99.495	94.444	90.909	90.909	88.889	97.98	89.899	90.909
KX364299 ck/CH/LSD/101223/16 China	88.384	91.414	87.374	88.889	90.404	89.899	86.364	83.838	91.414	90.404	89.394	89.394	80.808	81.313	80.808	100	100	100	100		89.899	81.313	81.313	80.303	89.899	89.899	82.828	86.869	83.333	90.404	88.889	100	100	100	84.848	84.848	84.848	85.354	90.909	96.465	92.424	99.495	94.444	90.909	90.909	88.889	97.98	89.899	90.909
KX236007 ck/CH/LSD/100408/16 China	84.848	96.465	92.424	86.869	98.485	97.98	91.414	83.333	94.949	97.98	94.444	94.444	82.828	83.333	82.828	89.899	89.899	89.899	89.899	89.899		80.808	82.828	82.323	97.98	97.98	83.333	93.434	83.838	98.485	85.859	89.899	89.899	89.899	83.838	83.838	83.838	84.343	87.879	89.394	89.394	89.899	90.404	89.394	87.374	84.343	89.899	86.364	88.889
KX219801 ck/CH/LSD/120437/16 China	84.848	82.323	83.838	84.848	82.323	81.818	87.879	95.96	82.323	82.323	81.818	81.818	92.929	93.434	92.929	81.313	81.313	81.313	81.313	81.313	80.808		92.424	93.434	82.828	82.828	92.929	82.323	93.434	82.323	86.364	81.313	81.313	81.313	94.949	94.949	94.949	94.444	86.364	81.313	85.859	81.313	82.323	83.838	84.848	83.333	81.313	82.323	86.364
MK032181 gCoV/ck/Chi/I0347/11 China	85.354	83.333	86.364	88.384	83.333	82.828	86.869	95.455	83.838	83.838	82.828	82.828	96.97	98.485	97.98	81.313	81.313	81.313	81.313	81.313	82.828	92.424		97.475	82.828	82.828	98.485	81.818	95.455	83.333	87.879	81.313	81.313	81.313	93.939	93.939	93.939	94.444	84.848	80.808	85.354	81.313	84.343	85.859	84.343	82.828	80.808	84.343	85.859
KX275391 ck/CH/LHLJ/140927/16 China	84.848	82.323	85.354	86.364	82.828	82.323	85.859	95.455	82.828	82.323	82.323	82.323	97.475	98.99	98.485	80.303	80.303	80.303	80.303	80.303	82.323	93.434	97.475		81.818	81.818	96.97	80.808	95.96	82.828	86.364	80.303	80.303	80.303	93.939	93.939	93.939	94.444	83.838	79.798	84.343	80.303	82.323	84.848	83.333	82.323	80.303	84.343	84.848
KX219800 ck/CH/LSD/130611/16 China	84.848	96.465	92.929	87.374	96.465	95.96	92.424	84.343	95.455	96.465	94.444	94.444	82.323	82.828	82.323	89.899	89.899	89.899	89.899	89.899	97.98	82.828	82.828	81.818		98.99	83.333	92.424	82.828	96.465	85.859	89.899	89.899	89.899	83.838	83.838	83.838	84.343	88.889	89.394	89.394	89.899	90.404	89.394	87.374	84.343	88.889	85.354	88.889
KX252787 ck/CH/LLN/131040/16/ China	84.848	97.475	92.929	87.374	97.475	96.97	93.434	84.343	95.455	97.475	94.444	94.444	82.323	82.828	82.323	89.899	89.899	89.899	89.899	89.899	97.98	82.828	82.828	81.818	98.99		83.333	93.434	82.828	97.475	85.859	89.899	89.899	89.899	84.848	84.848	84.848	84.343	88.889	90.404	89.394	89.899	90.404	89.394	87.374	85.354	88.889	85.354	89.899
KX252785 ck/CH/LSD/100311/16 China	86.869	83.838	87.374	88.384	83.838	83.333	87.879	95.96	85.354	84.343	84.343	84.343	96.465	97.98	97.475	82.828	82.828	82.828	82.828	82.828	83.333	92.929	98.485	96.97	83.333	83.333		82.828	95.96	83.838	88.384	82.828	82.828	82.828	95.455	95.455	95.455	95.96	85.859	82.323	86.364	82.828	84.343	84.848	85.354	84.343	82.323	85.859	86.869
KY407556 gCoV/ck/Chi/I0114/14 China	83.838	93.939	91.414	85.354	94.949	94.444	92.929	83.333	91.919	94.949	90.404	90.404	80.808	81.818	81.313	86.869	86.869	86.869	86.869	86.869	93.434	82.323	81.818	80.808	92.424	93.434	82.828		82.828	94.949	83.838	86.869	86.869	86.869	84.343	84.343	84.343	83.838	85.354	88.384	86.869	86.869	87.374	85.859	86.364	84.343	86.869	83.333	87.374
MK618759 K047-12/12 Korea	87.374	84.343	84.848	86.869	84.343	83.838	86.364	97.475	83.838	83.838	84.343	84.343	95.455	96.97	96.465	83.333	83.333	83.333	83.333	83.333	83.838	93.434	95.455	95.96	82.828	82.828	95.96	82.828		84.343	87.374	83.333	83.333	83.333	96.97	96.97	96.97	97.475	85.859	82.828	87.374	83.333	85.354	85.859	86.364	85.859	83.333	87.879	87.879
HM245924 CQ04-1/04 China	85.354	97.98	92.929	87.374	100	99.495	92.929	83.838	95.455	99.495	93.939	93.939	83.333	83.838	83.333	90.404	90.404	90.404	90.404	90.404	98.485	82.323	83.333	82.828	96.465	97.475	83.838	94.949	84.343		86.364	90.404	90.404	90.404	85.354	85.354	85.354	84.848	87.879	90.909	89.899	90.404	90.909	89.899	87.879	85.859	90.404	86.869	90.404
KX252779 ck/CH/LLN/06I/16 China	87.374	86.364	87.374	95.96	86.364	85.859	87.879	86.869	86.869	85.859	86.869	86.869	86.869	87.374	86.869	88.889	88.889	88.889	88.889	88.889	85.859	86.364	87.879	86.364	85.859	85.859	88.384	83.838	87.374	86.364		88.889	88.889	88.889	87.374	87.374	87.374	87.879	88.889	88.384	88.384	88.889	89.394	88.384	87.879	87.879	89.899	88.889	86.869
MK032177 gCoV/ck/Chi/I0724/17 China	88.384	91.414	87.374	88.889	90.404	89.899	86.364	83.838	91.414	90.404	89.394	89.394	80.808	81.313	80.808	100	100	100	100	100	89.899	81.313	81.313	80.303	89.899	89.899	82.828	86.869	83.333	90.404	88.889		100	100	84.848	84.848	84.848	85.354	90.909	96.465	92.424	99.495	94.444	90.909	90.909	88.889	97.98	89.899	90.909
MK032179 gCoV/ck/Chi/I0922/17 China	88.384	91.414	87.374	88.889	90.404	89.899	86.364	83.838	91.414	90.404	89.394	89.394	80.808	81.313	80.808	100	100	100	100	100	89.899	81.313	81.313	80.303	89.899	89.899	82.828	86.869	83.333	90.404	88.889	100		100	84.848	84.848	84.848	85.354	90.909	96.465	92.424	99.495	94.444	90.909	90.909	88.889	97.98	89.899	90.909
MK032180 gCoV/ck/China/I0737/17 China	88.384	91.414	87.374	88.889	90.404	89.899	86.364	83.838	91.414	90.404	89.394	89.394	80.808	81.313	80.808	100	100	100	100	100	89.899	81.313	81.313	80.303	89.899	89.899	82.828	86.869	83.333	90.404	88.889	100	100		84.848	84.848	84.848	85.354	90.909	96.465	92.424	99.495	94.444	90.909	90.909	88.889	97.98	89.899	90.909
OM525803 D535/4/FR/05	88.889	86.364	85.859	87.879	85.354	84.848	88.889	96.97	85.354	85.354	84.848	84.848	94.444	94.949	94.444	84.848	84.848	84.848	84.848	84.848	83.838	94.949	93.939	93.939	83.838	84.848	95.455	84.343	96.97	85.354	87.374	84.848	84.848	84.848		100	100	99.495	86.869	85.859	88.384	84.848	86.364	86.364	87.374	86.869	83.838	86.869	89.899
KY933089 1148-A/field/17 UK	88.889	86.364	85.859	87.879	85.354	84.848	88.889	96.97	85.354	85.354	84.848	84.848	94.444	94.949	94.444	84.848	84.848	84.848	84.848	84.848	83.838	94.949	93.939	93.939	83.838	84.848	95.455	84.343	96.97	85.354	87.374	84.848	84.848	84.848	100		100	99.495	86.869	85.859	88.384	84.848	86.364	86.364	87.374	86.869	83.838	86.869	89.899
MN548289 QX UK	88.889	86.364	85.859	87.879	85.354	84.848	88.889	96.97	85.354	85.354	84.848	84.848	94.444	94.949	94.444	84.848	84.848	84.848	84.848	84.848	83.838	94.949	93.939	93.939	83.838	84.848	95.455	84.343	96.97	85.354	87.374	84.848	84.848	84.848	100	100		99.495	86.869	85.859	88.384	84.848	86.364	86.364	87.374	86.869	83.838	86.869	89.899
KY933090 L1148/vaccine/17 UK	89.394	85.859	86.364	88.384	84.848	84.343	88.384	97.475	85.859	84.848	85.354	85.354	94.949	95.455	94.949	85.354	85.354	85.354	85.354	85.354	84.343	94.444	94.444	94.444	84.343	84.343	95.96	83.838	97.475	84.848	87.879	85.354	85.354	85.354	99.495	99.495	99.495		87.374	85.354	88.889	85.354	86.869	86.869	87.879	86.364	84.343	87.374	89.394
MK581205 gCoV/Ck/Pol/548/04 Poland	92.424	88.889	85.859	88.384	87.879	87.374	84.848	87.374	89.899	87.879	87.879	87.879	84.343	84.848	84.343	90.909	90.909	90.909	90.909	90.909	87.879	86.364	84.848	83.838	88.889	88.889	85.859	85.354	85.859	87.879	88.889	90.909	90.909	90.909	86.869	86.869	86.869	87.374		89.899	96.02	90.909	91.919	93.939	96.97	88.889	90.909	88.889	94.949
OM525806 D722/SK/06	87.374	91.919	86.869	88.384	90.909	90.404	86.869	82.828	90.909	90.909	88.889	88.889	80.303	80.808	80.303	96.465	96.465	96.465	96.465	96.465	89.394	81.313	80.808	79.798	89.394	90.404	82.323	88.384	82.828	90.909	88.384	96.465	96.465	96.465	85.859	85.859	85.859	85.354	89.899		91.414	96.465	93.434	90.404	89.899	88.889	95.455	88.889	90.909
OM525804 D591/2/GR/05	92.929	90.909	87.879	88.889	89.899	89.394	86.364	87.879	90.909	89.899	89.394	89.394	84.848	85.354	84.848	92.424	92.424	92.424	92.424	92.424	89.394	85.859	85.354	84.343	89.394	89.394	86.364	86.869	87.374	89.899	88.384	92.424	92.424	92.424	88.384	88.384	88.384	88.889	96.02	91.414		92.424	92.929	95.455	96.465	88.889	91.414	89.899	96.97
KX272465 AR251-15/14 Sudan	88.384	91.414	87.374	88.889	90.404	89.899	86.364	83.838	91.414	90.404	89.394	89.394	80.808	81.313	80.808	99.495	99.495	99.495	99.495	99.495	89.899	81.313	81.313	80.303	89.899	89.899	82.828	86.869	83.333	90.404	88.889	99.495	99.495	99.495	84.848	84.848	84.848	85.354	90.909	96.465	92.424		94.444	90.909	90.909	88.889	97.98	89.899	90.909
FN430414 ITA/90254/05 Italy	89.394	91.919	87.879	89.899	90.909	90.404	87.374	85.354	92.424	90.909	90.404	90.404	82.828	83.333	82.828	94.444	94.444	94.444	94.444	94.444	90.404	82.323	84.343	82.323	90.404	90.404	84.343	87.374	85.354	90.909	89.394	94.444	94.444	94.444	86.364	86.364	86.364	86.869	91.919	93.434	92.929	94.444		93.434	91.919	89.899	93.434	90.909	91.919
JQ088078 CK/SWE/065/8946/10 Sweden	91.414	90.909	86.364	89.899	89.899	89.394	84.848	85.354	89.394	89.899	87.374	87.374	84.343	84.848	84.343	90.909	90.909	90.909	90.909	90.909	89.394	83.838	85.859	84.848	89.394	89.394	84.848	85.859	85.859	89.899	88.384	90.909	90.909	90.909	86.364	86.364	86.364	86.869	93.939	90.404	95.455	90.909	93.434		93.939	87.879	89.899	88.889	93.939
KT886454 gCoV/Ck/Pol/74/09 Poland	93.434	88.889	85.354	87.374	87.879	87.374	84.848	86.869	88.889	87.879	87.879	87.879	83.838	84.343	83.838	90.909	90.909	90.909	90.909	90.909	87.374	84.848	84.343	83.333	87.374	87.374	85.354	86.364	86.364	87.879	87.879	90.909	90.909	90.909	87.374	87.374	87.374	87.879	96.97	89.899	96.465	90.909	91.919	93.939		88.889	90.909	88.889	95.455
MK581206 gCoV/Ck/Pol/195/12 Poland	92.424	86.869	81.818	87.374	85.859	85.354	83.333	84.343	85.354	85.859	84.343	84.343	82.323	82.828	82.323	88.889	88.889	88.889	88.889	88.889	84.343	83.333	82.828	82.323	84.343	85.354	84.343	84.343	85.859	85.859	87.879	88.889	88.889	88.889	86.869	86.869	86.869	86.364	88.889	88.889	88.889	88.889	89.899	87.879	88.889		88.889	97.98	88.889
OM525805 D683/HU/06	87.374	90.404	86.364	87.879	90.404	89.899	85.354	82.828	90.404	89.899	89.394	89.394	80.808	81.313	80.808	97.98	97.98	97.98	97.98	97.98	89.899	81.313	80.808	80.303	88.889	88.889	82.323	86.869	83.333	90.404	89.899	97.98	97.98	97.98	83.838	83.838	83.838	84.343	90.909	95.455	91.414	97.98	93.434	89.899	90.909	88.889		89.899	89.899
KX236001 ck/CH/LSD/03I/16 China	93.434	86.869	82.828	88.384	86.869	86.364	83.333	85.354	86.364	86.364	86.364	86.364	84.343	84.848	84.343	89.899	89.899	89.899	89.899	89.899	86.364	82.323	84.343	84.343	85.354	85.354	85.859	83.333	87.879	86.869	88.889	89.899	89.899	89.899	86.869	86.869	86.869	87.374	88.889	88.889	89.899	89.899	90.909	88.889	88.889	97.98	89.899		88.889
KP662631 ck/ZA/3665/11 South Africa	91.919	91.414	87.374	87.374	90.404	89.899	86.869	88.384	89.899	90.404	88.384	88.384	85.354	85.859	85.354	90.909	90.909	90.909	90.909	90.909	88.889	86.364	85.859	84.848	88.889	89.899	86.869	87.374	87.879	90.404	86.869	90.909	90.909	90.909	89.899	89.899	89.899	89.394	94.949	90.909	96.97	90.909	91.919	93.939	95.455	88.889	89.899	88.889
KF377577 4/91 vaccine China	88.384	91.414	87.374	88.889	90.404	89.899	86.364	83.838	91.414	90.404	89.394	89.394	80.808	81.313	80.808	100	100	100	100	100	89.899	81.313	81.313	80.303	89.899	89.899	82.828	86.869	83.333	90.404	88.889	100	100	100	84.848	84.848	84.848	85.354	90.909	96.465	92.424	99.495	94.444	90.909	90.909	88.889	97.98	89.899	90.909
KP118881 ck/CH/LBJ/140413/14 China	88.384	91.414	87.374	88.889	90.404	89.899	86.364	83.838	91.414	90.404	89.394	89.394	80.808	81.313	80.808	100	100	100	100	100	89.899	81.313	81.313	80.303	89.899	89.899	82.828	86.869	83.333	90.404	88.889	100	100	100	84.848	84.848	84.848	85.354	90.909	96.465	92.424	99.495	94.444	90.909	90.909	88.889	97.98	89.899	90.909
KP118880 ck/CH/LHB/130927/14 China	88.384	91.414	87.374	88.889	90.404	89.899	86.364	83.838	91.414	90.404	89.394	89.394	80.808	81.313	80.808	100	100	100	100	100	89.899	81.313	81.313	80.303	89.899	89.899	82.828	86.869	83.333	90.404	88.889	100	100	100	84.848	84.848	84.848	85.354	90.909	96.465	92.424	99.495	94.444	90.909	90.909	88.889	97.98	89.899	90.909
KP118888 ck/CH/LLN/130102/15 China	88.384	91.414	87.374	88.889	90.404	89.899	86.364	83.838	91.414	90.404	89.394	89.394	80.808	81.313	80.808	100	100	100	100	100	89.899	81.313	81.313	80.303	89.899	89.899	82.828	86.869	83.333	90.404	88.889	100	100	100	84.848	84.848	84.848	85.354	90.909	96.465	92.424	99.495	94.444	90.909	90.909	88.889	97.98	89.899	90.909
MZ367369 IBV/Ck/Bel/4134_001/19 Belgium	88.384	91.414	87.374	88.889	90.404	89.899	86.364	83.838	91.414	90.404	89.394	89.394	80.808	81.313	80.808	100	100	100	100	100	89.899	81.313	81.313	80.303	89.899	89.899	82.828	86.869	83.333	90.404	88.889	100	100	100	84.848	84.848	84.848	85.354	90.909	96.465	92.424	99.495	94.444	90.909	90.909	88.889	97.98	89.899	90.909
KP118884 ck/CH/LSD/110651/15 China	88.384	91.414	87.374	88.889	90.404	89.899	86.364	83.838	91.414	90.404	89.394	89.394	80.808	81.313	80.808	100	100	100	100	100	89.899	81.313	81.313	80.303	89.899	89.899	82.828	86.869	83.333	90.404	88.889	100	100	100	84.848	84.848	84.848	85.354	90.909	96.465	92.424	99.495	94.444	90.909	90.909	88.889	97.98	89.899	90.909
KP118882 ck/CH/LBJ/140402/14 China	88.384	91.414	87.374	88.889	90.404	89.899	86.364	83.838	91.414	90.404	89.394	89.394	80.808	81.313	80.808	100	100	100	100	100	89.899	81.313	81.313	80.303	89.899	89.899	82.828	86.869	83.333	90.404	88.889	100	100	100	84.848	84.848	84.848	85.354	90.909	96.465	92.424	99.495	94.444	90.909	90.909	88.889	97.98	89.899	90.909
KP118892 ck/CH/LLN/120101 China	88.384	91.414	87.374	88.889	90.404	89.899	86.364	83.838	91.414	90.404	89.394	89.394	80.808	81.313	80.808	100	100	100	100	100	89.899	81.313	81.313	80.303	89.899	89.899	82.828	86.869	83.333	90.404	88.889	100	100	100	84.848	84.848	84.848	85.354	90.909	96.465	92.424	99.495	94.444	90.909	90.909	88.889	97.98	89.899	90.909
KP118891 ck/CH/LHLJ/111246/14 China	88.384	91.414	87.374	88.889	90.404	89.899	86.364	83.838	91.414	90.404	89.394	89.394	80.808	81.313	80.808	100	100	100	100	100	89.899	81.313	81.313	80.303	89.899	89.899	82.828	86.869	83.333	90.404	88.889	100	100	100	84.848	84.848	84.848	85.354	90.909	96.465	92.424	99.495	94.444	90.909	90.909	88.889	97.98	89.899	90.909
KP118893 ck/CH/LSD/110410/14 China	88.384	91.414	87.374	88.889	90.404	89.899	86.364	83.838	91.414	90.404	89.394	89.394	80.808	81.313	80.808	100	100	100	100	100	89.899	81.313	81.313	80.303	89.899	89.899	82.828	86.869	83.333	90.404	88.889	100	100	100	84.848	84.848	84.848	85.354	90.909	96.465	92.424	99.495	94.444	90.909	90.909	88.889	97.98	89.899	90.909
KP036503 ck/CH/LHB/121010 China	88.384	91.414	87.374	88.889	90.404	89.899	86.364	83.838	91.414	90.404	89.394	89.394	80.808	81.313	80.808	100	100	100	100	100	89.899	81.313	81.313	80.303	89.899	89.899	82.828	86.869	83.333	90.404	88.889	100	100	100	84.848	84.848	84.848	85.354	90.909	96.465	92.424	99.495	94.444	90.909	90.909	88.889	97.98	89.899	90.909
KP036504 ck/CH/LHB/130630 China	88.384	91.414	87.374	88.889	90.404	89.899	86.364	83.838	91.414	90.404	89.394	89.394	80.808	81.313	80.808	100	100	100	100	100	89.899	81.313	81.313	80.303	89.899	89.899	82.828	86.869	83.333	90.404	88.889	100	100	100	84.848	84.848	84.848	85.354	90.909	96.465	92.424	99.495	94.444	90.909	90.909	88.889	97.98	89.899	90.909
KP118883 ck/CH/LHB/121041 China	88.384	91.414	87.374	88.889	90.404	89.899	86.364	83.838	91.414	90.404	89.394	89.394	80.808	81.313	80.808	100	100	100	100	100	89.899	81.313	81.313	80.303	89.899	89.899	82.828	86.869	83.333	90.404	88.889	100	100	100	84.848	84.848	84.848	85.354	90.909	96.465	92.424	99.495	94.444	90.909	90.909	88.889	97.98	89.899	90.909
KP118887 ck/CH/LHB/140532/14 China	87.879	90.909	86.869	88.384	89.899	89.394	85.859	83.333	90.909	89.899	88.889	88.889	80.303	80.808	80.303	99.495	99.495	99.495	99.495	99.495	89.394	80.808	80.808	79.798	89.394	89.394	82.323	86.364	82.828	89.899	88.384	99.495	99.495	99.495	84.343	84.343	84.343	84.848	90.404	95.96	91.919	98.99	93.939	90.404	90.404	88.384	97.475	89.394	90.404
KP118885 ck/CH/LSD/110857/14 China	88.384	91.414	87.374	88.889	90.404	89.899	86.364	83.838	91.414	90.404	89.394	89.394	80.808	81.313	80.808	100	100	100	100	100	89.899	81.313	81.313	80.303	89.899	89.899	82.828	86.869	83.333	90.404	88.889	100	100	100	84.848	84.848	84.848	85.354	90.909	96.465	92.424	99.495	94.444	90.909	90.909	88.889	97.98	89.899	90.909
KP036502 ck/CH/LHLJ/140906 China	88.384	91.414	87.374	88.889	90.404	89.899	86.364	83.838	91.414	90.404	89.394	89.394	80.808	81.313	80.808	100	100	100	100	100	89.899	81.313	81.313	80.303	89.899	89.899	82.828	86.869	83.333	90.404	88.889	100	100	100	84.848	84.848	84.848	85.354	90.909	96.465	92.424	99.495	94.444	90.909	90.909	88.889	97.98	89.899	90.909
KJ135013 IBVUkr27/11 Ukraine	93.939	91.414	87.879	88.889	90.404	89.899	87.374	88.889	90.909	90.404	89.899	89.899	85.859	86.364	85.859	92.424	92.424	92.424	92.424	92.424	89.899	85.859	86.364	85.354	89.899	89.899	87.374	87.879	88.384	90.404	88.384	92.424	92.424	92.424	89.394	89.394	89.394	89.899	96.517	91.414	98.01	92.424	93.434	95.455	97.475	89.394	91.414	90.404	97.98
KJ425496 ck/CH/LHB/130573 China	88.384	87.879	86.364	91.414	88.384	87.879	85.354	84.848	89.899	87.879	88.889	88.889	84.343	84.848	84.343	89.394	89.394	89.394	89.394	89.394	88.889	82.828	84.343	84.343	88.384	88.384	85.859	84.848	84.343	88.384	90.909	89.394	89.394	89.394	84.848	84.848	84.848	85.354	89.899	88.384	90.404	89.394	89.899	88.889	88.889	86.869	89.394	88.889	88.889
KP343691 ck/CH/LGX/130530 China	87.879	87.374	85.859	90.909	87.879	87.374	84.848	84.343	89.394	87.374	88.384	88.384	83.838	84.343	83.838	88.889	88.889	88.889	88.889	88.889	88.384	82.323	83.838	83.838	87.879	87.879	85.354	84.343	83.838	87.879	90.404	88.889	88.889	88.889	84.343	84.343	84.343	84.848	89.394	87.879	89.899	88.889	89.394	88.384	88.384	86.364	88.889	88.384	88.384
KT736032 ck/CHLDL150434-II/16 China	87.879	87.374	85.859	90.909	87.879	87.374	84.848	84.343	89.394	87.374	88.384	88.384	83.838	84.343	83.838	88.889	88.889	88.889	88.889	88.889	88.384	82.323	83.838	83.838	87.879	87.879	85.354	84.343	83.838	87.879	90.404	88.889	88.889	88.889	84.343	84.343	84.343	84.848	89.394	87.879	89.899	88.889	89.394	88.384	88.384	86.364	88.889	88.384	88.384
KU356856 ck/CH/SCYB/140913/25 China	87.879	87.374	85.859	90.909	87.879	87.374	84.848	84.343	89.394	87.374	88.384	88.384	83.838	84.343	83.838	88.889	88.889	88.889	88.889	88.889	88.384	82.323	83.838	83.838	87.879	87.879	85.354	84.343	83.838	87.879	90.404	88.889	88.889	88.889	84.343	84.343	84.343	84.848	89.394	87.879	89.899	88.889	89.394	88.384	88.384	86.364	88.889	88.384	88.384
MT505388 CK/CH/SCMY/160315/20 China	87.374	86.364	88.384	89.899	85.354	84.848	88.889	88.889	87.374	85.354	86.869	86.869	85.859	86.364	85.859	89.394	89.394	89.394	89.394	89.394	84.848	87.374	86.364	85.354	85.859	85.859	87.879	85.354	87.374	85.354	90.909	89.394	89.394	89.394	88.889	88.889	88.889	89.394	88.384	88.384	89.899	89.394	87.374	86.364	87.879	86.869	89.394	86.869	87.374
KJ425497 ck/CH/LHB/130598/14 China	88.384	91.414	87.374	88.889	90.404	89.899	86.364	83.838	91.414	90.404	89.394	89.394	80.808	81.313	80.808	100	100	100	100	100	89.899	81.313	81.313	80.303	89.899	89.899	82.828	86.869	83.333	90.404	88.889	100	100	100	84.848	84.848	84.848	85.354	90.909	96.465	92.424	99.495	94.444	90.909	90.909	88.889	97.98	89.899	90.909
FN430415 NGA/A116E7/06 Nigeria	89.899	90.909	86.869	87.879	89.899	89.394	85.354	87.879	89.899	89.899	87.879	87.879	86.364	86.869	86.364	91.414	91.414	91.414	91.414	91.414	89.394	84.848	86.869	85.859	89.394	89.394	87.374	86.364	88.384	89.899	86.869	91.414	91.414	91.414	88.889	88.889	88.889	89.394	93.434	90.909	94.444	91.414	92.424	94.949	93.434	88.384	90.404	89.394	94.949
KR231009 B1648/84 Belgium	90.909	88.889	84.848	87.374	89.394	88.889	83.838	85.354	88.384	88.889	87.374	87.374	83.838	84.343	83.838	89.899	89.899	89.899	89.899	89.899	88.889	83.838	83.838	83.333	87.879	87.879	84.848	86.364	86.364	89.394	89.394	89.899	89.899	89.899	85.859	85.859	85.859	86.364	95.455	89.394	94.949	89.899	90.909	94.949	95.455	88.384	90.909	89.394	93.434
MN548285 CR88 (4/91)/88 France	94.444	90.909	87.374	89.394	89.899	89.394	86.869	88.889	90.909	89.899	89.899	89.899	85.859	86.364	85.859	92.929	92.929	92.929	92.929	92.929	89.394	85.859	86.364	85.354	89.394	89.394	87.374	87.374	88.384	89.899	88.889	92.929	92.929	92.929	89.394	89.394	89.394	89.899	97.015	91.919	98.507	92.929	93.939	95.96	97.98	89.899	91.919	90.909	97.475
MN548288 Italy02/02 Italy	92.424	89.394	86.364	87.879	88.384	87.879	84.848	87.374	89.394	88.384	87.879	87.879	84.343	84.848	84.343	91.919	91.919	91.919	91.919	91.919	87.879	85.354	84.848	83.838	87.879	87.879	85.859	86.364	86.869	88.384	88.384	91.919	91.919	91.919	87.879	87.879	87.879	88.384	96.517	90.909	97.512	91.919	92.424	94.444	96.97	89.394	91.919	89.394	96.465
MG021194 gCoV/Ck/IT/624I/96 Italy	90.404	88.889	85.859	87.374	87.879	87.374	85.354	87.879	88.384	87.879	87.374	87.374	84.343	85.859	85.354	88.889	88.889	88.889	88.889	88.889	87.374	83.838	85.859	84.848	87.374	87.374	85.354	86.364	87.374	87.879	85.859	88.889	88.889	88.889	87.374	87.374	87.374	87.879	92.929	87.879	94.444	88.889	91.919	93.434	93.939	85.859	87.879	86.869	93.434
KU900739 QIA-03342/03 Korea	89.394	83.838	80.303	84.848	84.343	83.838	80.303	82.323	83.838	84.848	82.828	82.828	82.323	82.828	82.323	87.879	87.879	87.879	87.879	87.879	83.838	79.293	83.333	82.323	82.323	82.323	84.848	81.313	83.333	84.343	85.354	87.879	87.879	87.879	83.838	83.838	83.838	84.343	84.848	86.364	85.859	88.384	87.879	85.859	84.848	92.424	86.869	92.929	84.848
KU900744 QIA-Q43/06 Korea	88.384	84.343	79.798	83.838	83.838	83.333	79.798	81.313	83.333	84.343	82.323	82.323	81.313	81.818	81.313	86.869	86.869	86.869	86.869	86.869	83.333	78.788	82.323	81.313	82.323	81.818	83.838	80.808	82.323	83.838	84.343	86.869	86.869	86.869	82.828	82.828	82.828	83.333	83.838	85.354	84.848	87.374	86.869	84.848	83.838	90.404	85.859	91.919	83.838
KJ425504 ck/CH/LHJL/091205 China	88.889	83.333	79.293	83.838	81.818	81.313	78.788	81.313	82.323	82.323	82.828	82.828	78.788	80.303	79.798	84.848	84.848	84.848	84.848	84.848	82.323	77.273	81.818	79.798	81.818	81.818	82.323	79.293	82.323	81.818	83.838	84.848	84.848	84.848	81.818	81.818	81.818	82.323	86.364	84.848	86.364	84.848	86.869	87.374	86.364	88.889	84.343	90.404	85.354
MH539771 IBV/SES/15AB-01 Canada	88.889	83.333	79.293	83.838	81.818	81.313	78.788	81.313	82.323	82.323	82.828	82.828	78.788	80.303	79.798	84.848	84.848	84.848	84.848	84.848	82.323	77.273	81.818	79.798	81.818	81.818	82.323	79.293	82.323	81.818	83.838	84.848	84.848	84.848	81.818	81.818	81.818	82.323	86.364	84.848	86.364	84.848	86.869	87.374	86.364	88.889	84.343	90.404	85.354
MH539772 IBV/SES/15SK-02 Canada	88.889	83.333	79.293	83.838	81.818	81.313	78.788	81.313	82.323	82.323	82.828	82.828	78.788	80.303	79.798	84.848	84.848	84.848	84.848	84.848	82.323	77.273	81.818	79.798	81.818	81.818	82.323	79.293	82.323	81.818	83.838	84.848	84.848	84.848	81.818	81.818	81.818	82.323	86.364	84.848	86.364	84.848	86.869	87.374	86.364	88.889	84.343	90.404	85.354
MK937830 M41/19 China	88.384	82.828	78.788	83.333	81.313	80.808	78.283	80.808	81.818	81.818	82.323	82.323	78.283	79.798	79.293	84.343	84.343	84.343	84.343	84.343	81.818	76.768	81.313	79.293	81.313	81.313	81.818	78.788	81.818	81.313	83.333	84.343	84.343	84.343	81.313	81.313	81.313	81.818	85.859	84.343	85.859	84.343	86.364	86.869	85.859	88.384	83.838	89.899	84.848
MW446887 IBV/M41/Y192 China	88.384	82.828	78.788	83.333	81.313	80.808	78.283	80.808	81.818	81.818	82.323	82.323	78.283	79.798	79.293	84.343	84.343	84.343	84.343	84.343	81.818	76.768	81.313	79.293	81.313	81.313	81.818	78.788	81.818	81.313	83.333	84.343	84.343	84.343	81.313	81.313	81.313	81.818	85.859	84.343	85.859	84.343	86.364	86.869	85.859	88.384	83.838	89.899	84.848
MW429061 IBV/M41/Y28 China	88.384	82.828	78.788	83.333	81.313	80.808	78.283	80.808	81.818	81.818	82.323	82.323	78.283	79.798	79.293	84.343	84.343	84.343	84.343	84.343	81.818	76.768	81.313	79.293	81.313	81.313	81.818	78.788	81.818	81.313	83.333	84.343	84.343	84.343	81.313	81.313	81.313	81.818	85.859	84.343	85.859	84.343	86.364	86.869	85.859	88.384	83.838	89.899	84.848
MW446888 IBV/M41/Y27 China	88.384	82.828	78.788	83.333	81.313	80.808	78.283	80.808	81.818	81.818	82.323	82.323	78.283	79.798	79.293	84.343	84.343	84.343	84.343	84.343	81.818	76.768	81.313	79.293	81.313	81.313	81.818	78.788	81.818	81.313	83.333	84.343	84.343	84.343	81.313	81.313	81.313	81.818	85.859	84.343	85.859	84.343	86.364	86.869	85.859	88.384	83.838	89.899	84.848
MW429062 IBV/M41/N56 China	88.384	82.828	78.788	83.333	81.313	80.808	78.283	80.808	81.818	81.818	82.323	82.323	78.283	79.798	79.293	84.343	84.343	84.343	84.343	84.343	81.818	76.768	81.313	79.293	81.313	81.313	81.818	78.788	81.818	81.313	83.333	84.343	84.343	84.343	81.313	81.313	81.313	81.818	85.859	84.343	85.859	84.343	86.364	86.869	85.859	88.384	83.838	89.899	84.848
MK728875 M41-CK/17 UK	88.889	83.333	79.293	83.838	81.818	81.313	78.788	81.313	82.323	82.323	82.828	82.828	78.788	80.303	79.798	84.848	84.848	84.848	84.848	84.848	82.323	77.273	81.818	79.798	81.818	81.818	82.323	79.293	82.323	81.818	83.838	84.848	84.848	84.848	81.818	81.818	81.818	82.323	86.364	84.848	86.364	84.848	86.869	87.374	86.364	88.889	84.343	90.404	85.354
KJ435286 ck/CH/LSD/1112150 China	89.394	83.838	79.798	84.343	82.323	81.818	79.293	81.818	82.323	82.828	82.828	82.828	79.293	80.808	80.303	85.354	85.354	85.354	85.354	85.354	82.828	77.778	82.323	80.303	82.323	82.323	82.828	79.798	82.828	82.323	84.343	85.354	85.354	85.354	82.323	82.323	82.323	82.828	86.869	85.354	86.869	85.354	87.374	87.879	86.869	89.394	84.848	90.909	85.859
KY047602 gCoV/Ck/Pol/G052/16 Poland	94.444	90.909	87.374	89.394	89.899	89.394	86.869	88.889	90.909	89.899	89.899	89.899	85.859	86.364	85.859	92.929	92.929	92.929	92.929	92.929	89.394	85.859	86.364	85.354	89.394	89.394	87.374	87.374	88.384	89.899	88.889	92.929	92.929	92.929	89.394	89.394	89.394	89.899	96.97	91.919	98.485	92.929	93.939	95.96	97.98	89.899	91.919	90.909	97.475
MK581207 gCoV/Ck/Pol/G103/16 Poland	94.444	90.909	87.374	89.394	89.899	89.394	86.869	88.889	90.909	89.899	89.899	89.899	85.859	86.364	85.859	92.929	92.929	92.929	92.929	92.929	89.394	85.859	86.364	85.354	89.394	89.394	87.374	87.374	88.384	89.899	88.889	92.929	92.929	92.929	89.394	89.394	89.394	89.899	96.97	91.919	98.485	92.929	93.939	95.96	97.98	89.899	91.919	90.909	97.475
MK581208 gCoV/Ck/Pol/G225/17 Poland	91.414	89.899	86.364	88.384	89.899	89.394	85.859	85.859	90.909	89.394	90.909	90.909	84.343	84.848	84.343	91.414	91.414	91.414	91.414	91.414	89.899	83.838	84.343	83.838	88.889	88.889	85.354	86.364	86.869	89.899	88.889	91.414	91.414	91.414	87.374	87.374	87.374	87.879	94.949	91.414	96.465	91.414	92.424	93.939	94.949	87.374	91.414	89.394	94.444
MK581202 gCoV/Ck/Pol/80/89 Poland	87.374	89.394	85.859	86.869	90.404	89.899	85.354	83.333	90.909	89.899	89.394	89.394	81.313	82.323	81.818	92.424	92.424	92.424	92.424	92.424	89.899	80.808	81.818	81.818	87.879	87.879	83.333	87.879	83.838	90.404	87.879	92.424	92.424	92.424	83.838	83.838	83.838	84.343	88.384	90.909	90.404	92.424	91.919	87.879	88.384	87.374	92.424	89.394	88.384
MK581203 gCoV/Ck/Pol/162/97 Poland	92.929	89.394	86.364	88.889	88.384	87.879	85.354	87.879	90.404	88.384	88.384	88.384	84.848	85.354	84.848	91.414	91.414	91.414	91.414	91.414	87.879	84.848	85.354	84.343	88.889	88.889	86.364	85.354	86.364	88.384	88.384	91.414	91.414	91.414	87.374	87.374	87.374	87.879	97.475	90.404	96.465	91.414	92.424	94.444	96.465	88.384	90.404	89.394	95.455
MK581204 gCoV/Ck/Pol/255/97 Poland	92.929	90.909	86.364	87.879	89.899	89.394	86.869	87.374	89.899	89.899	88.889	88.889	84.343	84.848	84.343	91.414	91.414	91.414	91.414	91.414	88.384	85.354	84.848	83.838	88.384	89.394	85.859	87.374	86.869	89.899	87.374	91.414	91.414	91.414	88.889	88.889	88.889	88.384	95.522	91.414	97.015	91.414	92.424	94.444	96.465	89.394	90.404	89.394	96.97
MT591566 CK/DE/IB80/16 Germany	91.919	89.899	86.364	88.889	89.899	89.394	84.848	86.869	88.889	89.899	86.869	86.869	85.354	85.859	85.354	89.899	89.899	89.899	89.899	89.899	88.384	84.848	85.859	84.848	87.374	88.384	86.869	86.869	87.374	89.899	87.879	89.899	89.899	89.899	88.889	88.889	88.889	88.384	93.939	90.404	95.96	89.899	91.414	93.939	94.444	89.899	88.889	89.899	95.96
MN987231 IBV/ck/EGY-Monuf/USC-3/13 Egypt	90.404	89.394	85.859	89.394	89.394	88.889	85.354	86.364	88.384	88.889	87.374	87.374	85.859	86.364	85.859	89.899	89.899	89.899	89.899	89.899	89.394	84.343	85.859	85.859	88.384	88.384	86.364	85.354	87.879	89.394	88.889	89.899	89.899	89.899	87.374	87.374	87.374	87.879	94.949	89.394	93.939	89.899	91.414	93.434	92.929	88.889	89.899	90.909	92.929
KR608272 LDT3-A/03 China	87.374	86.869	85.354	90.404	87.374	86.869	84.343	83.838	88.889	86.869	87.879	87.879	83.333	83.838	83.333	88.384	88.384	88.384	88.384	88.384	87.879	81.818	83.333	83.333	87.374	87.374	84.848	83.838	83.333	87.374	89.899	88.384	88.384	88.384	83.838	83.838	83.838	84.343	88.889	87.374	89.394	88.384	88.889	87.879	87.879	85.859	88.384	87.879	87.879
MK574042 ck/CH/LHB/110615/19 China	82.323	89.394	91.919	87.374	89.394	88.889	91.414	84.848	89.394	88.889	88.889	88.889	83.838	84.848	85.354	84.343	84.343	84.343	84.343	84.343	87.879	83.838	84.343	83.838	87.879	88.889	85.354	88.384	84.343	89.394	86.364	84.343	84.343	84.343	85.354	85.354	85.354	84.848	83.333	84.848	85.354	84.343	83.838	82.828	82.828	81.313	84.343	82.323	85.859
MK574043 ck/CH/LHB/110627/19 China	82.323	89.394	91.919	87.374	89.394	88.889	91.414	84.848	89.394	88.889	88.889	88.889	83.838	84.848	85.354	84.343	84.343	84.343	84.343	84.343	87.879	83.838	84.343	83.838	87.879	88.889	85.354	88.384	84.343	89.394	86.364	84.343	84.343	84.343	85.354	85.354	85.354	84.848	83.333	84.848	85.354	84.343	83.838	82.828	82.828	81.313	84.343	82.323	85.859
MN548286 D1466/84 UK	88.889	88.889	84.343	87.374	88.384	87.879	85.354	83.838	87.374	88.384	87.374	87.374	81.313	82.828	82.323	90.909	90.909	90.909	90.909	90.909	88.889	80.808	82.828	81.818	88.889	88.889	83.333	86.869	83.838	88.384	88.384	90.909	90.909	90.909	83.838	83.838	83.838	84.343	88.384	89.899	87.374	90.909	91.919	87.374	88.384	90.909	90.909	90.909	86.364
[truncated: 52 more columns]

## Sheet: 5b
Table S1i. Nucleotide identities between sequences in the QX dataset (n=101). Gene 5b.
	KR822424 TCoV/080385d/08 France	OM525802 D532/9/CH/05	KX219797 ck/CH/LXJ/02I/16 China	KX252772 ck/CH/LSHH/03II/16 China	KX252778 ck/CH/LJL/05I/16 China	HQ848267 GX-YL5/05 China	KF411041 CK/CH/LGX/091109/13 China	KP118886 ck/CH/LSD/111235/14 China	KX185058 ck/CH/LGS/08I/16 China	KX219791 ck/CH/LHLJ/07I/16 China	KX219792 ck/CH/LGS/06I/16 China	KX375805 ck/CH/LJS/07V/16 China	KX252789 ck/CH/LHLJ/090605/16 China	KX252777 ck/CH/LSD/07I/16 China	KX364293 ck/CH/LJL/07III/16 China	KX219794 ck/CH/LJS/101109/16 China	KX236009 ck/CH/LSX/130132/16 China	KX259250 ck/CH/LJS/101113/16 China	KX302862 ck/CH/LJS/101111/16 China	KX364299 ck/CH/LSD/101223/16 China	KX236007 ck/CH/LSD/100408/16 China	KX219801 ck/CH/LSD/120437/16 China	MK032181 gCoV/ck/Chi/I0347/11 China	KX275391 ck/CH/LHLJ/140927/16 China	KX219800 ck/CH/LSD/130611/16 China	KX252787 ck/CH/LLN/131040/16/ China	KX252785 ck/CH/LSD/100311/16 China	KY407556 gCoV/ck/Chi/I0114/14 China	MK618759 K047-12/12 Korea	HM245924 CQ04-1/04 China	KX252779 ck/CH/LLN/06I/16 China	MK032177 gCoV/ck/Chi/I0724/17 China	MK032179 gCoV/ck/Chi/I0922/17 China	MK032180 gCoV/ck/China/I0737/17 China	OM525803 D535/4/FR/05	KY933089 1148-A/field/17 UK	MN548289 QX UK	KY933090 L1148/vaccine/17 UK	MK581205 gCoV/Ck/Pol/548/04 Poland	OM525806 D722/SK/06	OM525804 D591/2/GR/05	KX272465 AR251-15/14 Sudan	FN430414 ITA/90254/05 Italy	JQ088078 CK/SWE/065/8946/10 Sweden	KT886454 gCoV/Ck/Pol/74/09 Poland	MK581206 gCoV/Ck/Pol/195/12 Poland	>OM525805 D683/HU/06	KX236001 ck/CH/LSD/03I/16 China	KP662631 ck/ZA/3665/11 South Africa
KR822424 TCoV/080385d/08 France	90.763	89.96	89.96	89.157	91.566	89.96	91.165	90.361	91.968	89.96	89.558	89.558	89.96	90.763	93.976	93.976	93.976	93.976	93.976	89.157	91.165	91.165	88.755	90.361	90.361	91.165	90.361	87.952	91.968	89.96	93.173	93.976	93.173	91.165	91.165	91.165	91.165	96.787	90.763	98.394	93.574	95.582	95.984	98.394	94.378	96.787	96.386	95.181	93.976
OM525802 D532/9/CH/05	90.763		97.59	97.189	97.189	92.369	98.394	98.795	98.795	91.968	96.787	96.386	96.386	96.787	97.189	92.771	92.771	92.771	92.771	92.771	97.189	98.394	98.795	95.582	97.189	97.189	98.795	93.574	95.582	91.968	98.394	91.968	92.771	91.968	98.795	98.795	98.795	97.992	89.96	96.787	90.763	92.369	89.96	88.353	90.763	89.157	90.763	92.369	90.361
KX219797 ck/CH/LXJ/02I/16 China	89.96	97.59		97.189	96.386	92.369	98.394	98.795	97.992	91.968	95.984	95.582	96.386	96.787	97.189	91.968	91.968	91.968	91.968	91.968	96.386	98.394	97.189	95.582	96.386	96.386	97.189	94.378	94.779	91.968	98.394	91.165	91.968	91.165	97.992	97.992	97.992	97.189	89.96	95.181	89.96	92.369	89.157	87.55	89.96	88.353	89.96	91.566	89.558
KX252772 ck/CH/LSHH/03II/16 China	89.96	97.189	97.189		95.984	91.968	97.189	98.394	97.59	91.566	95.582	95.181	96.787	97.189	97.189	92.369	92.369	92.369	92.369	92.369	95.984	98.394	96.787	95.984	95.984	95.984	96.787	92.771	95.181	91.566	97.189	91.566	92.369	91.566	97.59	97.59	97.59	96.787	89.157	94.779	89.96	91.968	89.558	88.353	89.96	88.755	90.361	91.165	89.558
KX252778 ck/CH/LJL/05I/16 China	89.157	97.189	96.386	95.984		92.771	97.189	97.59	97.59	92.369	96.386	95.984	95.181	95.582	95.984	90.763	90.763	90.763	90.763	90.763	100	97.189	95.984	94.378	96.787	96.787	95.984	92.369	93.574	92.369	97.189	89.96	90.763	89.96	96.787	96.787	96.787	95.984	88.353	94.779	89.157	90.361	89.157	86.747	89.157	88.353	89.96	90.763	88.755
HQ848267 GX-YL5/05 China	91.566	92.369	92.369	91.968	92.771		91.566	92.771	91.968	97.992	92.369	91.968	90.763	91.165	91.968	95.582	95.582	95.582	95.582	95.582	92.771	93.173	91.968	89.96	92.771	92.771	91.968	94.378	89.96	98.795	91.566	94.779	95.582	94.779	92.771	92.771	92.771	92.771	90.763	92.369	91.566	95.984	92.369	89.157	91.566	92.369	93.976	92.771	89.96
KF411041 CK/CH/LGX/091109/13 China	89.96	98.394	98.394	97.189	97.189	91.566		98.795	98.795	91.165	96.787	96.386	96.386	96.787	97.189	91.968	91.968	91.968	91.968	91.968	97.189	98.394	97.189	95.582	97.189	97.189	97.189	93.574	94.779	91.165	100	91.165	91.968	91.165	97.992	97.992	97.992	97.189	89.96	96.386	89.96	91.566	89.157	87.55	89.96	88.755	89.96	91.566	89.558
KP118886 ck/CH/LSD/111235/14 China	91.165	98.795	98.795	98.394	97.59	92.771	98.795		99.197	92.369	97.189	96.787	97.59	97.992	98.394	93.173	93.173	93.173	93.173	93.173	97.59	99.598	98.394	96.787	97.59	97.59	98.394	93.976	95.984	92.369	98.795	92.369	93.173	92.369	99.197	99.197	99.197	98.394	90.361	96.386	91.165	92.771	90.361	88.755	91.165	89.558	91.165	92.771	90.763
KX185058 ck/CH/LGS/08I/16 China	90.361	98.795	97.992	97.59	97.59	91.968	98.795	99.197		91.566	97.189	96.787	96.787	97.189	97.59	92.369	92.369	92.369	92.369	92.369	97.59	98.795	97.59	95.984	97.59	97.59	97.59	93.173	95.181	91.566	98.795	91.566	92.369	91.566	98.394	98.394	98.394	97.59	89.558	97.189	90.361	91.968	89.558	87.952	90.361	88.755	90.361	91.968	89.96
KX219791 ck/CH/LHLJ/07I/16 China	91.968	91.968	91.968	91.566	92.369	97.992	91.165	92.369	91.566		92.771	92.369	91.165	91.566	92.369	95.984	95.984	95.984	95.984	95.984	92.369	92.771	91.566	90.361	93.173	93.173	91.566	95.582	89.558	99.197	91.165	95.181	95.984	95.181	92.369	92.369	92.369	92.369	91.165	91.968	92.771	96.386	93.574	91.165	92.771	92.771	94.378	93.173	91.968
KX219792 ck/CH/LGS/06I/16 China	89.96	96.787	95.984	95.582	96.386	92.369	96.787	97.189	97.189	92.771		99.598	95.582	95.984	96.386	91.968	91.968	91.968	91.968	91.968	96.386	96.787	95.582	94.779	99.598	99.598	95.582	93.574	93.976	91.968	96.787	91.165	91.968	91.165	96.386	96.386	96.386	96.386	89.157	94.378	90.763	91.566	91.165	88.353	90.763	90.763	91.566	90.763	90.361
KX375805 ck/CH/LJS/07V/16 China	89.558	96.386	95.582	95.181	95.984	91.968	96.386	96.787	96.787	92.369	99.598		95.181	95.582	95.984	91.566	91.566	91.566	91.566	91.566	95.984	96.386	95.181	94.378	99.197	99.197	95.181	93.173	93.574	91.566	96.386	90.763	91.566	90.763	95.984	95.984	95.984	95.984	88.755	93.976	90.361	91.165	90.763	87.952	90.361	90.361	91.165	90.361	89.96
KX252789 ck/CH/LHLJ/090605/16 China	89.558	96.386	96.386	96.787	95.181	90.763	96.386	97.59	96.787	91.165	95.582	95.181		99.598	98.394	91.165	91.165	91.165	91.165	91.165	95.181	97.189	97.59	98.394	95.984	95.984	97.59	92.369	97.59	90.361	96.386	90.361	91.165	90.361	96.787	96.787	96.787	95.984	87.952	93.976	90.361	90.763	88.755	87.952	90.361	88.353	89.157	90.361	89.157
KX252777 ck/CH/LSD/07I/16 China	89.96	96.787	96.787	97.189	95.582	91.165	96.787	97.992	97.189	91.566	95.984	95.582	99.598		98.795	91.566	91.566	91.566	91.566	91.566	95.582	97.59	97.992	98.795	96.386	96.386	97.992	92.771	97.992	90.763	96.787	90.763	91.566	90.763	97.189	97.189	97.189	96.386	88.353	94.378	90.763	91.165	89.157	88.353	90.763	88.755	89.558	90.763	89.558
KX364293 ck/CH/LJL/07III/16 China	90.763	97.189	97.189	97.189	95.984	91.968	97.189	98.394	97.59	92.369	96.386	95.984	98.394	98.795		92.369	92.369	92.369	92.369	92.369	95.984	98.795	98.394	97.59	96.787	96.787	98.394	92.771	96.787	91.566	97.189	91.566	92.369	91.566	97.59	97.59	97.59	96.787	89.157	94.779	91.566	91.968	89.96	89.157	91.566	89.157	89.96	91.165	90.361
KX219794 ck/CH/LJS/101109/16 China	93.976	92.771	91.968	92.369	90.763	95.582	91.968	93.173	92.369	95.984	91.968	91.566	91.165	91.566	92.369		100	100	100	100	90.763	93.574	92.369	90.361	92.369	92.369	92.369	93.976	89.558	95.984	91.968	99.197	100	99.197	93.574	93.574	93.574	93.574	93.173	92.771	93.976	99.598	94.378	91.566	93.976	93.173	95.582	95.582	92.369
KX236009 ck/CH/LSX/130132/16 China	93.976	92.771	91.968	92.369	90.763	95.582	91.968	93.173	92.369	95.984	91.968	91.566	91.165	91.566	92.369	100		100	100	100	90.763	93.574	92.369	90.361	92.369	92.369	92.369	93.976	89.558	95.984	91.968	99.197	100	99.197	93.574	93.574	93.574	93.574	93.173	92.771	93.976	99.598	94.378	91.566	93.976	93.173	95.582	95.582	92.369
KX259250 ck/CH/LJS/101113/16 China	93.976	92.771	91.968	92.369	90.763	95.582	91.968	93.173	92.369	95.984	91.968	91.566	91.165	91.566	92.369	100	100		100	100	90.763	93.574	92.369	90.361	92.369	92.369	92.369	93.976	89.558	95.984	91.968	99.197	100	99.197	93.574	93.574	93.574	93.574	93.173	92.771	93.976	99.598	94.378	91.566	93.976	93.173	95.582	95.582	92.369
KX302862 ck/CH/LJS/101111/16 China	93.976	92.771	91.968	92.369	90.763	95.582	91.968	93.173	92.369	95.984	91.968	91.566	91.165	91.566	92.369	100	100	100		100	90.763	93.574	92.369	90.361	92.369	92.369	92.369	93.976	89.558	95.984	91.968	99.197	100	99.197	93.574	93.574	93.574	93.574	93.173	92.771	93.976	99.598	94.378	91.566	93.976	93.173	95.582	95.582	92.369
KX364299 ck/CH/LSD/101223/16 China	93.976	92.771	91.968	92.369	90.763	95.582	91.968	93.173	92.369	95.984	91.968	91.566	91.165	91.566	92.369	100	100	100	100		90.763	93.574	92.369	90.361	92.369	92.369	92.369	93.976	89.558	95.984	91.968	99.197	100	99.197	93.574	93.574	93.574	93.574	93.173	92.771	93.976	99.598	94.378	91.566	93.976	93.173	95.582	95.582	92.369
KX236007 ck/CH/LSD/100408/16 China	89.157	97.189	96.386	95.984	100	92.771	97.189	97.59	97.59	92.369	96.386	95.984	95.181	95.582	95.984	90.763	90.763	90.763	90.763	90.763		97.189	95.984	94.378	96.787	96.787	95.984	92.369	93.574	92.369	97.189	89.96	90.763	89.96	96.787	96.787	96.787	95.984	88.353	94.779	89.157	90.361	89.157	86.747	89.157	88.353	89.96	90.763	88.755
KX219801 ck/CH/LSD/120437/16 China	91.165	98.394	98.394	98.394	97.189	93.173	98.394	99.598	98.795	92.771	96.787	96.386	97.189	97.59	98.795	93.574	93.574	93.574	93.574	93.574	97.189		97.992	96.386	97.189	97.189	97.992	93.574	95.582	92.771	98.394	92.771	93.574	92.771	98.795	98.795	98.795	97.992	90.361	95.984	91.165	93.173	90.361	88.755	91.165	89.558	91.165	92.369	90.763
MK032181 gCoV/ck/Chi/I0347/11 China	91.165	98.795	97.189	96.787	95.984	91.968	97.189	98.394	97.59	91.566	95.582	95.181	97.59	97.992	98.394	92.369	92.369	92.369	92.369	92.369	95.984	97.992		96.787	95.984	95.984	100	93.574	96.787	91.566	97.189	91.566	92.369	91.566	98.394	98.394	98.394	97.59	89.558	95.582	91.165	91.968	89.558	88.755	91.165	88.755	90.361	91.968	89.96
KX275391 ck/CH/LHLJ/140927/16 China	88.755	95.582	95.582	95.984	94.378	89.96	95.582	96.787	95.984	90.361	94.779	94.378	98.394	98.795	97.59	90.361	90.361	90.361	90.361	90.361	94.378	96.386	96.787		95.181	95.181	96.787	91.566	98.394	89.558	95.582	89.558	90.361	89.558	95.984	95.984	95.984	95.181	87.149	93.976	89.558	89.96	87.952	87.149	89.558	88.353	88.353	89.558	88.353
KX219800 ck/CH/LSD/130611/16 China	90.361	97.189	96.386	95.984	96.787	92.771	97.189	97.59	97.59	93.173	99.598	99.197	95.984	96.386	96.787	92.369	92.369	92.369	92.369	92.369	96.787	97.189	95.984	95.181		100	95.984	93.976	94.378	92.369	97.189	91.566	92.369	91.566	96.787	96.787	96.787	96.787	89.558	94.779	91.165	91.968	91.566	88.755	91.165	91.165	91.968	91.165	90.763
KX252787 ck/CH/LLN/131040/16/ China	90.361	97.189	96.386	95.984	96.787	92.771	97.189	97.59	97.59	93.173	99.598	99.197	95.984	96.386	96.787	92.369	92.369	92.369	92.369	92.369	96.787	97.189	95.984	95.181	100		95.984	93.976	94.378	92.369	97.189	91.566	92.369	91.566	96.787	96.787	96.787	96.787	89.558	94.779	91.165	91.968	91.566	88.755	91.165	91.165	91.968	91.165	90.763
KX252785 ck/CH/LSD/100311/16 China	91.165	98.795	97.189	96.787	95.984	91.968	97.189	98.394	97.59	91.566	95.582	95.181	97.59	97.992	98.394	92.369	92.369	92.369	92.369	92.369	95.984	97.992	100	96.787	95.984	95.984		93.574	96.787	91.566	97.189	91.566	92.369	91.566	98.394	98.394	98.394	97.59	89.558	95.582	91.165	91.968	89.558	88.755	91.165	88.755	90.361	91.968	89.96
KY407556 gCoV/ck/Chi/I0114/14 China	90.361	93.574	94.378	92.771	92.369	94.378	93.574	93.976	93.173	95.582	93.574	93.173	92.369	92.771	92.771	93.976	93.976	93.976	93.976	93.976	92.369	93.574	93.574	91.566	93.976	93.976	93.574		90.763	95.582	93.574	93.173	93.976	93.173	93.976	93.976	93.976	93.976	90.361	93.173	90.361	94.378	91.165	89.558	90.361	91.165	92.771	92.369	89.558
MK618759 K047-12/12 Korea	87.952	95.582	94.779	95.181	93.574	89.96	94.779	95.984	95.181	89.558	93.976	93.574	97.59	97.992	96.787	89.558	89.558	89.558	89.558	89.558	93.574	95.582	96.787	98.394	94.378	94.378	96.787	90.763		88.755	94.779	88.755	89.558	88.755	95.181	95.181	95.181	94.378	86.345	93.173	88.755	89.157	87.149	86.345	88.755	87.55	87.55	88.755	87.55
HM245924 CQ04-1/04 China	91.968	91.968	91.968	91.566	92.369	98.795	91.165	92.369	91.566	99.197	91.968	91.566	90.361	90.763	91.566	95.984	95.984	95.984	95.984	95.984	92.369	92.771	91.566	89.558	92.369	92.369	91.566	95.582	88.755		91.165	95.181	95.984	95.181	92.369	92.369	92.369	92.369	91.165	91.968	91.968	96.386	92.771	90.361	91.968	91.968	94.378	93.173	91.165
KX252779 ck/CH/LLN/06I/16 China	89.96	98.394	98.394	97.189	97.189	91.566	100	98.795	98.795	91.165	96.787	96.386	96.386	96.787	97.189	91.968	91.968	91.968	91.968	91.968	97.189	98.394	97.189	95.582	97.189	97.189	97.189	93.574	94.779	91.165		91.165	91.968	91.165	97.992	97.992	97.992	97.189	89.96	96.386	89.96	91.566	89.157	87.55	89.96	88.755	89.96	91.566	89.558
MK032177 gCoV/ck/Chi/I0724/17 China	93.173	91.968	91.165	91.566	89.96	94.779	91.165	92.369	91.566	95.181	91.165	90.763	90.361	90.763	91.566	99.197	99.197	99.197	99.197	99.197	89.96	92.771	91.566	89.558	91.566	91.566	91.566	93.173	88.755	95.181	91.165		99.197	98.394	92.771	92.771	92.771	92.771	92.369	91.968	93.173	98.795	93.574	90.763	93.173	92.369	94.779	94.779	91.566
MK032179 gCoV/ck/Chi/I0922/17 China	93.976	92.771	91.968	92.369	90.763	95.582	91.968	93.173	92.369	95.984	91.968	91.566	91.165	91.566	92.369	100	100	100	100	100	90.763	93.574	92.369	90.361	92.369	92.369	92.369	93.976	89.558	95.984	91.968	99.197		99.197	93.574	93.574	93.574	93.574	93.173	92.771	93.976	99.598	94.378	91.566	93.976	93.173	95.582	95.582	92.369
MK032180 gCoV/ck/China/I0737/17 China	93.173	91.968	91.165	91.566	89.96	94.779	91.165	92.369	91.566	95.181	91.165	90.763	90.361	90.763	91.566	99.197	99.197	99.197	99.197	99.197	89.96	92.771	91.566	89.558	91.566	91.566	91.566	93.173	88.755	95.181	91.165	98.394	99.197		92.771	92.771	92.771	92.771	92.369	91.968	93.173	98.795	93.574	90.763	93.173	92.369	94.779	94.779	91.566
OM525803 D535/4/FR/05	91.165	98.795	97.992	97.59	96.787	92.771	97.992	99.197	98.394	92.369	96.386	95.984	96.787	97.189	97.59	93.574	93.574	93.574	93.574	93.574	96.787	98.795	98.394	95.984	96.787	96.787	98.394	93.976	95.181	92.369	97.992	92.771	93.574	92.771		100	100	99.197	90.361	96.386	91.165	93.173	90.361	88.755	91.165	89.558	91.165	92.771	90.763
KY933089 1148-A/field/17 UK	91.165	98.795	97.992	97.59	96.787	92.771	97.992	99.197	98.394	92.369	96.386	95.984	96.787	97.189	97.59	93.574	93.574	93.574	93.574	93.574	96.787	98.795	98.394	95.984	96.787	96.787	98.394	93.976	95.181	92.369	97.992	92.771	93.574	92.771	100		100	99.197	90.361	96.386	91.165	93.173	90.361	88.755	91.165	89.558	91.165	92.771	90.763
MN548289 QX UK	91.165	98.795	97.992	97.59	96.787	92.771	97.992	99.197	98.394	92.369	96.386	95.984	96.787	97.189	97.59	93.574	93.574	93.574	93.574	93.574	96.787	98.795	98.394	95.984	96.787	96.787	98.394	93.976	95.181	92.369	97.992	92.771	93.574	92.771	100	100		99.197	90.361	96.386	91.165	93.173	90.361	88.755	91.165	89.558	91.165	92.771	90.763
KY933090 L1148/vaccine/17 UK	91.165	97.992	97.189	96.787	95.984	92.771	97.189	98.394	97.59	92.369	96.386	95.984	95.984	96.386	96.787	93.574	93.574	93.574	93.574	93.574	95.984	97.992	97.59	95.181	96.787	96.787	97.59	93.976	94.378	92.369	97.189	92.771	93.574	92.771	99.197	99.197	99.197		90.361	95.582	91.165	93.173	90.361	88.755	91.165	89.558	91.165	92.771	91.165
MK581205 gCoV/Ck/Pol/548/04 Poland	96.787	89.96	89.96	89.157	88.353	90.763	89.96	90.361	89.558	91.165	89.157	88.755	87.952	88.353	89.157	93.173	93.173	93.173	93.173	93.173	88.353	90.361	89.558	87.149	89.558	89.558	89.558	90.361	86.345	91.165	89.96	92.369	93.173	92.369	90.361	90.361	90.361	90.361		89.96	96.787	92.771	94.779	95.181	96.787	93.574	95.984	95.582	94.378
OM525806 D722/SK/06	90.763	96.787	95.181	94.779	94.779	92.369	96.386	96.386	97.189	91.968	94.378	93.976	93.976	94.378	94.779	92.771	92.771	92.771	92.771	92.771	94.779	95.984	95.582	93.976	94.779	94.779	95.582	93.173	93.173	91.968	96.386	91.968	92.771	91.968	96.386	96.386	96.386	95.582	89.96		90.763	92.369	89.96	88.353	90.763	90.361	90.763	92.369	89.157
OM525804 D591/2/GR/05	98.394	90.763	89.96	89.96	89.157	91.566	89.96	91.165	90.361	92.771	90.763	90.361	90.361	90.763	91.566	93.976	93.976	93.976	93.976	93.976	89.157	91.165	91.165	89.558	91.165	91.165	91.165	90.361	88.755	91.968	89.96	93.173	93.976	93.173	91.165	91.165	91.165	91.165	96.787	90.763		93.574	96.386	96.787	99.197	95.181	96.787	96.386	95.984
KX272465 AR251-15/14 Sudan	93.574	92.369	92.369	91.968	90.361	95.984	91.566	92.771	91.968	96.386	91.566	91.165	90.763	91.165	91.968	99.598	99.598	99.598	99.598	99.598	90.361	93.173	91.968	89.96	91.968	91.968	91.968	94.378	89.157	96.386	91.566	98.795	99.598	98.795	93.173	93.173	93.173	93.173	92.771	92.369	93.574		93.976	91.165	93.574	92.771	95.181	95.181	91.968
FN430414 ITA/90254/05 Italy	95.582	89.96	89.157	89.558	89.157	92.369	89.157	90.361	89.558	93.574	91.165	90.763	88.755	89.157	89.96	94.378	94.378	94.378	94.378	94.378	89.157	90.361	89.558	87.952	91.566	91.566	89.558	91.165	87.149	92.771	89.157	93.574	94.378	93.574	90.361	90.361	90.361	90.361	94.779	89.96	96.386	93.976		94.779	96.386	94.779	96.386	95.984	94.779
JQ088078 CK/SWE/065/8946/10 Sweden	95.984	88.353	87.55	88.353	86.747	89.157	87.55	88.755	87.952	91.165	88.353	87.952	87.952	88.353	89.157	91.566	91.566	91.566	91.566	91.566	86.747	88.755	88.755	87.149	88.755	88.755	88.755	89.558	86.345	90.361	87.55	90.763	91.566	90.763	88.755	88.755	88.755	88.755	95.181	88.353	96.787	91.165	94.779		96.787	93.574	94.378	94.378	95.181
KT886454 gCoV/Ck/Pol/74/09 Poland	98.394	90.763	89.96	89.96	89.157	91.566	89.96	91.165	90.361	92.771	90.763	90.361	90.361	90.763	91.566	93.976	93.976	93.976	93.976	93.976	89.157	91.165	91.165	89.558	91.165	91.165	91.165	90.361	88.755	91.968	89.96	93.173	93.976	93.173	91.165	91.165	91.165	91.165	96.787	90.763	99.197	93.574	96.386	96.787		95.181	96.787	96.386	95.984
MK581206 gCoV/Ck/Pol/195/12 Poland	94.378	89.157	88.353	88.755	88.353	92.369	88.755	89.558	88.755	92.771	90.763	90.361	88.353	88.755	89.157	93.173	93.173	93.173	93.173	93.173	88.353	89.558	88.755	88.353	91.165	91.165	88.755	91.165	87.55	91.968	88.755	92.369	93.173	92.369	89.558	89.558	89.558	89.558	93.574	90.361	95.181	92.771	94.779	93.574	95.181		96.787	93.574	93.574
>OM525805 D683/HU/06	96.787	90.763	89.96	90.361	89.96	93.976	89.96	91.165	90.361	94.378	91.566	91.165	89.157	89.558	89.96	95.582	95.582	95.582	95.582	95.582	89.96	91.165	90.361	88.353	91.968	91.968	90.361	92.771	87.55	94.378	89.96	94.779	95.582	94.779	91.165	91.165	91.165	91.165	95.984	90.763	96.787	95.181	96.386	94.378	96.787	96.787		95.582	95.181
KX236001 ck/CH/LSD/03I/16 China	96.386	92.369	91.566	91.165	90.763	92.771	91.566	92.771	91.968	93.173	90.763	90.361	90.361	90.763	91.165	95.582	95.582	95.582	95.582	95.582	90.763	92.369	91.968	89.558	91.165	91.165	91.968	92.369	88.755	93.173	91.566	94.779	95.582	94.779	92.771	92.771	92.771	92.771	95.582	92.369	96.386	95.181	95.984	94.378	96.386	93.574	95.582		94.779
KP662631 ck/ZA/3665/11 South Africa	95.181	90.361	89.558	89.558	88.755	89.96	89.558	90.763	89.96	91.968	90.361	89.96	89.157	89.558	90.361	92.369	92.369	92.369	92.369	92.369	88.755	90.763	89.96	88.353	90.763	90.763	89.96	89.558	87.55	91.165	89.558	91.566	92.369	91.566	90.763	90.763	90.763	91.165	94.378	89.157	95.984	91.968	94.779	95.181	95.984	93.574	95.181	94.779
KF377577 4/91 vaccine China	93.976	92.771	91.968	92.369	90.763	95.582	91.968	93.173	92.369	95.984	91.968	91.566	91.165	91.566	92.369	100	100	100	100	100	90.763	93.574	92.369	90.361	92.369	92.369	92.369	93.976	89.558	95.984	91.968	99.197	100	99.197	93.574	93.574	93.574	93.574	93.173	92.771	93.976	99.598	94.378	91.566	93.976	93.173	95.582	95.582	92.369
KP118881 ck/CH/LBJ/140413/14 China	93.976	92.771	91.968	92.369	90.763	95.582	91.968	93.173	92.369	95.984	91.968	91.566	91.165	91.566	92.369	100	100	100	100	100	90.763	93.574	92.369	90.361	92.369	92.369	92.369	93.976	89.558	95.984	91.968	99.197	100	99.197	93.574	93.574	93.574	93.574	93.173	92.771	93.976	99.598	94.378	91.566	93.976	93.173	95.582	95.582	92.369
KP118880 ck/CH/LHB/130927/14 China	93.976	92.771	91.968	92.369	90.763	95.582	91.968	93.173	92.369	95.984	91.968	91.566	91.165	91.566	92.369	100	100	100	100	100	90.763	93.574	92.369	90.361	92.369	92.369	92.369	93.976	89.558	95.984	91.968	99.197	100	99.197	93.574	93.574	93.574	93.574	93.173	92.771	93.976	99.598	94.378	91.566	93.976	93.173	95.582	95.582	92.369
KP118888 ck/CH/LLN/130102/15 China	93.976	92.771	91.968	92.369	90.763	95.582	91.968	93.173	92.369	95.984	91.968	91.566	91.165	91.566	92.369	100	100	100	100	100	90.763	93.574	92.369	90.361	92.369	92.369	92.369	93.976	89.558	95.984	91.968	99.197	100	99.197	93.574	93.574	93.574	93.574	93.173	92.771	93.976	99.598	94.378	91.566	93.976	93.173	95.582	95.582	92.369
MZ367369 IBV/Ck/Bel/4134_001/19 Belgium	93.976	92.771	91.968	92.369	90.763	95.582	91.968	93.173	92.369	95.984	91.968	91.566	91.165	91.566	92.369	100	100	100	100	100	90.763	93.574	92.369	90.361	92.369	92.369	92.369	93.976	89.558	95.984	91.968	99.197	100	99.197	93.574	93.574	93.574	93.574	93.173	92.771	93.976	99.598	94.378	91.566	93.976	93.173	95.582	95.582	92.369
KP118884 ck/CH/LSD/110651/15 China	93.976	92.771	91.968	92.369	90.763	95.582	91.968	93.173	92.369	95.984	91.968	91.566	91.165	91.566	92.369	100	100	100	100	100	90.763	93.574	92.369	90.361	92.369	92.369	92.369	93.976	89.558	95.984	91.968	99.197	100	99.197	93.574	93.574	93.574	93.574	93.173	92.771	93.976	99.598	94.378	91.566	93.976	93.173	95.582	95.582	92.369
KP118882 ck/CH/LBJ/140402/14 China	93.574	92.369	91.566	91.968	90.361	95.181	91.566	92.771	91.968	95.582	91.566	91.165	90.763	91.165	91.968	99.598	99.598	99.598	99.598	99.598	90.361	93.173	91.968	89.96	91.968	91.968	91.968	93.574	89.157	95.582	91.566	98.795	99.598	99.598	93.173	93.173	93.173	93.173	92.771	92.369	93.574	99.197	93.976	91.165	93.574	92.771	95.181	95.181	91.968
KP118892 ck/CH/LLN/120101 China	93.976	92.771	91.968	92.369	90.763	95.582	91.968	93.173	92.369	95.984	91.968	91.566	91.165	91.566	92.369	100	100	100	100	100	90.763	93.574	92.369	90.361	92.369	92.369	92.369	93.976	89.558	95.984	91.968	99.197	100	99.197	93.574	93.574	93.574	93.574	93.173	92.771	93.976	99.598	94.378	91.566	93.976	93.173	95.582	95.582	92.369
KP118891 ck/CH/LHLJ/111246/14 China	93.976	92.771	91.968	92.369	90.763	95.582	91.968	93.173	92.369	95.984	91.968	91.566	91.165	91.566	92.369	100	100	100	100	100	90.763	93.574	92.369	90.361	92.369	92.369	92.369	93.976	89.558	95.984	91.968	99.197	100	99.197	93.574	93.574	93.574	93.574	93.173	92.771	93.976	99.598	94.378	91.566	93.976	93.173	95.582	95.582	92.369
KP118893 ck/CH/LSD/110410/14 China	93.976	92.771	91.968	92.369	90.763	95.582	91.968	93.173	92.369	95.984	91.968	91.566	91.165	91.566	92.369	100	100	100	100	100	90.763	93.574	92.369	90.361	92.369	92.369	92.369	93.976	89.558	95.984	91.968	99.197	100	99.197	93.574	93.574	93.574	93.574	93.173	92.771	93.976	99.598	94.378	91.566	93.976	93.173	95.582	95.582	92.369
KP036503 ck/CH/LHB/121010 China	93.976	92.771	91.968	92.369	90.763	95.582	91.968	93.173	92.369	95.984	91.968	91.566	91.165	91.566	92.369	100	100	100	100	100	90.763	93.574	92.369	90.361	92.369	92.369	92.369	93.976	89.558	95.984	91.968	99.197	100	99.197	93.574	93.574	93.574	93.574	93.173	92.771	93.976	99.598	94.378	91.566	93.976	93.173	95.582	95.582	92.369
KP036504 ck/CH/LHB/130630 China	93.976	92.771	91.968	92.369	90.763	95.582	91.968	93.173	92.369	95.984	91.968	91.566	91.165	91.566	92.369	100	100	100	100	100	90.763	93.574	92.369	90.361	92.369	92.369	92.369	93.976	89.558	95.984	91.968	99.197	100	99.197	93.574	93.574	93.574	93.574	93.173	92.771	93.976	99.598	94.378	91.566	93.976	93.173	95.582	95.582	92.369
KP118883 ck/CH/LHB/121041 China	93.976	92.771	91.968	92.369	90.763	95.582	91.968	93.173	92.369	95.984	91.968	91.566	91.165	91.566	92.369	100	100	100	100	100	90.763	93.574	92.369	90.361	92.369	92.369	92.369	93.976	89.558	95.984	91.968	99.197	100	99.197	93.574	93.574	93.574	93.574	93.173	92.771	93.976	99.598	94.378	91.566	93.976	93.173	95.582	95.582	92.369
KP118887 ck/CH/LHB/140532/14 China	93.976	92.771	91.968	92.369	90.763	95.582	91.968	93.173	92.369	95.984	91.968	91.566	91.165	91.566	92.369	100	100	100	100	100	90.763	93.574	92.369	90.361	92.369	92.369	92.369	93.976	89.558	95.984	91.968	99.197	100	99.197	93.574	93.574	93.574	93.574	93.173	92.771	93.976	99.598	94.378	91.566	93.976	93.173	95.582	95.582	92.369
KP118885 ck/CH/LSD/110857/14 China	93.976	92.771	91.968	92.369	90.763	95.582	91.968	93.173	92.369	95.984	91.968	91.566	91.165	91.566	92.369	100	100	100	100	100	90.763	93.574	92.369	90.361	92.369	92.369	92.369	93.976	89.558	95.984	91.968	99.197	100	99.197	93.574	93.574	93.574	93.574	93.173	92.771	93.976	99.598	94.378	91.566	93.976	93.173	95.582	95.582	92.369
KP036502 ck/CH/LHLJ/140906 China	93.574	92.369	91.566	91.968	90.361	95.181	91.566	92.771	91.968	95.582	91.566	91.165	90.763	91.165	91.968	99.598	99.598	99.598	99.598	99.598	90.361	93.173	91.968	89.96	91.968	91.968	91.968	93.574	89.157	95.582	91.566	98.795	99.598	99.598	93.173	93.173	93.173	93.173	92.771	92.369	93.574	99.197	93.976	91.165	93.574	92.771	95.181	95.181	91.968
KJ135013 IBVUkr27/11 Ukraine	98.795	91.165	90.361	90.361	89.558	91.968	90.361	91.566	90.763	93.173	91.165	90.763	90.763	91.165	91.968	94.378	94.378	94.378	94.378	94.378	89.558	91.566	91.566	89.96	91.566	91.566	91.566	90.763	89.157	92.369	90.361	93.574	94.378	93.574	91.566	91.566	91.566	91.566	97.189	91.165	99.598	93.976	96.787	97.189	99.598	95.582	97.189	96.787	96.386
KJ425496 ck/CH/LHB/130573 China	90.361	96.787	96.787	97.59	95.582	91.968	96.787	97.992	97.189	91.566	95.181	94.779	97.189	97.59	97.992	92.369	92.369	92.369	92.369	92.369	95.582	98.394	97.189	96.386	95.582	95.582	97.189	92.369	95.582	91.566	96.787	91.566	92.369	91.566	97.189	97.189	97.189	96.386	88.755	94.378	90.361	91.968	88.755	87.952	90.361	88.353	89.96	90.763	89.157
KP343691 ck/CH/LGX/130530 China	89.96	97.189	97.189	97.992	95.984	92.369	97.189	98.394	97.59	91.968	95.582	95.181	96.787	97.189	97.59	92.771	92.771	92.771	92.771	92.771	95.984	98.795	96.787	95.984	95.984	95.984	96.787	92.771	95.181	91.968	97.189	91.968	92.771	91.968	97.59	97.59	97.59	96.787	89.157	94.779	89.96	92.369	89.157	87.55	89.96	88.755	90.361	91.165	89.558
KT736032 ck/CHLDL150434-II/16 China	89.96	97.189	97.189	97.992	95.984	92.369	97.189	98.394	97.59	91.968	95.582	95.181	96.787	97.189	97.59	92.771	92.771	92.771	92.771	92.771	95.984	98.795	96.787	95.984	95.984	95.984	96.787	92.771	95.181	91.968	97.189	91.968	92.771	91.968	97.59	97.59	97.59	96.787	89.157	94.779	89.96	92.369	89.157	87.55	89.96	88.755	90.361	91.165	89.558
KU356856 ck/CH/SCYB/140913/25 China	89.558	96.787	96.787	97.59	95.582	91.968	96.787	97.992	97.189	91.566	95.181	94.779	96.386	96.787	97.189	92.369	92.369	92.369	92.369	92.369	95.582	98.394	96.386	95.582	95.582	95.582	96.386	92.369	94.779	91.566	96.787	91.566	92.369	91.566	97.189	97.189	97.189	96.386	88.755	94.378	89.558	91.968	88.755	87.149	89.558	88.353	89.96	90.763	89.157
MT505388 CK/CH/SCMY/160315/20 China	91.165	97.189	97.992	96.787	95.984	92.771	97.992	98.394	97.59	92.369	96.386	95.984	95.984	96.386	96.787	93.173	93.173	93.173	93.173	93.173	95.984	97.992	96.787	95.181	96.787	96.787	96.787	94.779	94.378	92.369	97.992	92.369	93.173	92.369	97.59	97.59	97.59	97.59	91.165	94.779	91.165	92.771	90.361	88.755	91.165	89.558	91.165	92.771	90.763
KJ425497 ck/CH/LHB/130598/14 China	93.976	92.771	91.968	92.369	90.763	95.582	91.968	93.173	92.369	95.984	91.968	91.566	91.165	91.566	92.369	100	100	100	100	100	90.763	93.574	92.369	90.361	92.369	92.369	92.369	93.976	89.558	95.984	91.968	99.197	100	99.197	93.574	93.574	93.574	93.574	93.173	92.771	93.976	99.598	94.378	91.566	93.976	93.173	95.582	95.582	92.369
FN430415 NGA/A116E7/06 Nigeria	95.582	89.157	88.353	88.755	88.353	91.968	88.755	89.558	88.755	92.369	89.96	89.558	89.157	89.558	89.96	92.771	92.771	92.771	92.771	92.771	88.353	89.558	89.558	89.157	90.361	90.361	89.558	89.558	88.353	91.566	88.755	91.968	92.771	91.968	89.558	89.558	89.558	89.558	93.976	90.763	96.386	92.369	94.378	93.976	96.386	95.984	95.582	94.378	93.976
KR231009 B1648/84 Belgium	94.378	91.165	90.361	90.361	89.96	92.369	90.361	91.566	90.763	91.968	90.361	89.96	90.361	90.763	90.763	94.378	94.378	94.378	94.378	94.378	89.96	91.165	91.566	89.558	90.763	90.763	91.566	90.763	88.755	91.968	90.361	93.574	94.378	93.574	92.369	92.369	92.369	92.369	92.771	91.968	94.378	93.976	93.173	91.968	94.378	92.771	94.378	94.779	91.165
MN548285 CR88 (4/91)/88 France	98.795	91.165	90.361	90.361	89.558	91.968	90.361	91.566	90.763	93.173	91.165	90.763	90.763	91.165	91.968	94.378	94.378	94.378	94.378	94.378	89.558	91.566	91.566	89.96	91.566	91.566	91.566	90.763	89.157	92.369	90.361	93.574	94.378	93.574	91.566	91.566	91.566	91.566	97.189	91.165	99.598	93.976	96.787	97.189	99.598	95.582	97.189	96.787	96.386
MN548288 Italy02/02 Italy	98.394	90.763	89.96	89.96	89.157	91.566	89.96	91.165	90.361	92.771	90.763	90.361	90.361	90.763	91.566	93.976	93.976	93.976	93.976	93.976	89.157	91.165	91.165	89.558	91.165	91.165	91.165	90.361	88.755	91.968	89.96	93.173	93.976	93.173	91.165	91.165	91.165	91.165	96.787	90.763	99.197	93.574	96.386	96.787	99.197	95.181	96.787	96.386	95.984
MG021194 gCoV/Ck/IT/624I/96 Italy	96.787	90.763	89.96	89.96	89.157	92.369	90.361	91.165	90.361	93.574	91.566	91.165	89.558	89.96	90.763	94.779	94.779	94.779	94.779	94.779	89.157	91.165	90.361	88.755	91.968	91.968	90.361	91.165	87.952	92.771	90.361	93.976	94.779	93.976	91.165	91.165	91.165	91.165	95.984	91.566	97.59	94.378	96.386	95.181	97.59	96.386	97.59	95.582	95.984
KU900739 QIA-03342/03 Korea	95.181	92.369	91.566	91.968	90.361	93.173	91.566	92.771	91.968	94.378	91.566	91.165	91.165	91.566	92.369	95.984	95.984	95.984	95.984	95.984	90.361	92.771	91.968	90.361	91.968	91.968	91.968	91.968	89.558	93.574	91.566	95.181	95.984	95.181	92.771	92.771	92.771	91.968	94.378	92.369	95.984	95.582	96.787	93.574	95.984	93.574	95.181	96.787	93.574
KU900744 QIA-Q43/06 Korea	95.181	92.369	91.566	92.369	90.361	93.173	91.566	92.771	91.968	93.574	89.96	89.558	90.763	91.165	91.566	95.984	95.984	95.984	95.984	95.984	90.361	92.771	91.968	89.96	90.361	90.361	91.968	91.968	89.157	93.574	91.566	95.181	95.984	95.181	92.771	92.771	92.771	91.968	94.378	92.369	95.181	95.582	95.181	92.771	95.181	92.771	95.181	96.787	92.771
KJ425504 ck/CH/LHJL/091205 China	95.984	91.165	90.361	90.361	89.558	91.968	90.361	91.566	90.763	92.369	89.558	89.157	89.157	89.558	90.361	95.181	95.181	95.181	95.181	95.181	89.558	91.566	90.763	88.353	89.96	89.96	90.763	91.165	87.55	92.369	90.361	94.378	95.181	94.378	91.566	91.566	91.566	91.566	95.181	91.165	95.984	94.779	95.181	93.976	95.984	93.173	95.181	98.795	94.378
MH539771 IBV/SES/15AB-01 Canada	95.984	91.165	90.361	90.361	89.558	91.968	90.361	91.566	90.763	92.369	89.558	89.157	89.157	89.558	90.361	95.181	95.181	95.181	95.181	95.181	89.558	91.566	90.763	88.353	89.96	89.96	90.763	91.165	87.55	92.369	90.361	94.378	95.181	94.378	91.566	91.566	91.566	91.566	95.181	91.165	95.984	94.779	95.181	93.976	95.984	93.173	95.181	98.795	94.378
MH539772 IBV/SES/15SK-02 Canada	95.984	91.165	90.361	90.361	89.558	91.968	90.361	91.566	90.763	92.369	89.558	89.157	89.157	89.558	90.361	95.181	95.181	95.181	95.181	95.181	89.558	91.566	90.763	88.353	89.96	89.96	90.763	91.165	87.55	92.369	90.361	94.378	95.181	94.378	91.566	91.566	91.566	91.566	95.181	91.165	95.984	94.779	95.181	93.976	95.984	93.173	95.181	98.795	94.378
MK937830 M41/19 China	95.582	90.763	89.96	89.96	89.157	91.566	89.96	91.165	90.361	91.968	89.157	88.755	88.755	89.157	89.96	94.779	94.779	94.779	94.779	94.779	89.157	91.165	90.361	87.952	89.558	89.558	90.361	90.763	87.149	91.968	89.96	93.976	94.779	93.976	91.165	91.165	91.165	91.165	94.779	90.763	95.582	94.378	95.582	94.378	95.582	92.771	94.779	98.394	94.779
MW446887 IBV/M41/Y192 China	95.582	90.763	89.96	89.96	89.157	91.566	89.96	91.165	90.361	91.968	89.157	88.755	88.755	89.157	89.96	94.779	94.779	94.779	94.779	94.779	89.157	91.165	90.361	87.952	89.558	89.558	90.361	90.763	87.149	91.968	89.96	93.976	94.779	93.976	91.165	91.165	91.165	91.165	94.779	90.763	95.582	94.378	95.582	94.378	95.582	92.771	94.779	98.394	94.779
MW429061 IBV/M41/Y28 China	95.582	90.763	89.96	89.96	89.157	91.566	89.96	91.165	90.361	91.968	89.157	88.755	88.755	89.157	89.96	94.779	94.779	94.779	94.779	94.779	89.157	91.165	90.361	87.952	89.558	89.558	90.361	90.763	87.149	91.968	89.96	93.976	94.779	93.976	91.165	91.165	91.165	91.165	94.779	90.763	95.582	94.378	95.582	94.378	95.582	92.771	94.779	98.394	94.779
MW446888 IBV/M41/Y27 China	95.582	90.763	89.96	89.96	89.157	91.566	89.96	91.165	90.361	91.968	89.157	88.755	88.755	89.157	89.96	94.779	94.779	94.779	94.779	94.779	89.157	91.165	90.361	87.952	89.558	89.558	90.361	90.763	87.149	91.968	89.96	93.976	94.779	93.976	91.165	91.165	91.165	91.165	94.779	90.763	95.582	94.378	95.582	94.378	95.582	92.771	94.779	98.394	94.779
MW429062 IBV/M41/N56 China	95.582	90.763	89.96	89.96	89.157	91.566	89.96	91.165	90.361	91.968	89.157	88.755	88.755	89.157	89.96	94.779	94.779	94.779	94.779	94.779	89.157	91.165	90.361	87.952	89.558	89.558	90.361	90.763	87.149	91.968	89.96	93.976	94.779	93.976	91.165	91.165	91.165	91.165	94.779	90.763	95.582	94.378	95.582	94.378	95.582	92.771	94.779	98.394	94.779
MK728875 M41-CK/17 UK	95.582	90.763	89.96	89.96	89.157	91.566	89.96	91.165	90.361	91.968	89.157	88.755	88.755	89.157	89.96	94.779	94.779	94.779	94.779	94.779	89.157	91.165	90.361	87.952	89.558	89.558	90.361	90.763	87.149	91.968	89.96	93.976	94.779	93.976	91.165	91.165	91.165	91.165	94.779	90.763	95.582	94.378	95.582	94.378	95.582	92.771	94.779	98.394	94.779
KJ435286 ck/CH/LSD/1112150 China	94.779	90.763	89.96	89.558	89.157	91.165	89.96	91.165	90.361	91.566	89.157	88.755	88.755	89.157	89.558	94.378	94.378	94.378	94.378	94.378	89.157	90.763	90.361	87.952	89.558	89.558	90.361	90.763	87.149	91.566	89.96	93.574	94.378	93.574	91.165	91.165	91.165	91.165	93.976	91.165	94.779	93.976	95.181	93.574	94.779	91.968	93.976	98.394	93.976
KY047602 gCoV/Ck/Pol/G052/16 Poland	96.787	89.96	89.157	89.558	88.353	92.369	89.157	90.361	89.558	93.574	90.763	90.361	89.96	90.361	90.763	94.779	94.779	94.779	94.779	94.779	88.353	90.361	90.361	89.157	91.165	91.165	90.361	91.165	88.353	92.771	89.157	93.976	94.779	93.976	90.361	90.361	90.361	90.361	95.181	89.96	97.59	94.378	96.386	95.984	97.59	95.984	97.59	94.779	95.984
MK581207 gCoV/Ck/Pol/G103/16 Poland	96.787	89.96	89.157	89.558	88.353	92.369	89.157	90.361	89.558	93.574	90.763	90.361	89.96	90.361	90.763	94.779	94.779	94.779	94.779	94.779	88.353	90.361	90.361	89.157	91.165	91.165	90.361	91.165	88.353	92.771	89.157	93.976	94.779	93.976	90.361	90.361	90.361	90.361	95.181	89.96	97.59	94.378	96.386	95.984	97.59	95.984	97.59	94.779	95.984
MK581208 gCoV/Ck/Pol/G225/17 Poland	95.181	90.361	89.558	89.96	89.558	93.574	89.558	90.763	89.96	93.976	91.968	91.566	89.558	89.96	90.361	94.378	94.378	94.378	94.378	94.378	89.558	90.763	89.96	89.558	92.369	92.369	89.96	91.566	88.755	93.173	89.558	93.574	94.378	93.574	90.763	90.763	90.763	90.763	95.181	91.165	95.984	93.976	95.582	93.574	95.984	97.59	97.59	94.378	94.378
MK581202 gCoV/Ck/Pol/80/89 Poland	91.165	93.976	92.369	92.369	91.968	93.574	93.173	93.574	93.574	93.173	93.173	92.771	92.369	91.968	91.968	94.779	94.779	94.779	94.779	94.779	91.968	93.173	92.771	91.566	93.574	93.574	92.771	93.574	90.763	93.173	93.173	93.976	94.779	93.976	93.574	93.574	93.574	93.574	90.361	94.779	91.165	94.378	91.165	88.755	91.165	91.968	93.574	92.771	89.558
MK581203 gCoV/Ck/Pol/162/97 Poland	91.968	93.976	92.369	92.771	93.574	95.181	93.173	93.574	93.574	94.779	93.976	93.574	91.566	91.968	92.771	95.582	95.582	95.582	95.582	95.582	93.574	93.976	92.771	90.763	94.378	94.378	92.771	94.378	89.96	94.779	93.173	94.779	95.582	94.779	93.574	93.574	93.574	93.574	91.968	93.976	91.968	95.181	92.771	89.558	91.968	92.771	94.378	93.976	91.165
MK581204 gCoV/Ck/Pol/255/97 Poland	96.386	90.361	90.361	89.96	89.558	94.378	89.558	90.763	89.96	94.779	91.968	91.566	89.558	89.96	90.361	94.378	94.378	94.378	94.378	94.378	89.558	90.763	89.96	88.755	92.369	92.369	89.96	92.369	87.952	93.976	89.558	93.574	94.378	93.574	90.763	90.763	90.763	90.763	95.582	90.361	97.189	94.779	96.787	94.779	97.189	97.189	97.992	95.181	94.779
MT591566 CK/DE/IB80/16 Germany	98.394	90.763	89.96	89.96	89.157	91.566	89.96	91.165	90.361	92.771	90.763	90.361	90.361	90.763	91.566	93.976	93.976	93.976	93.976	93.976	89.157	91.165	91.165	89.558	91.165	91.165	91.165	90.361	88.755	91.968	89.96	93.173	93.976	93.173	91.165	91.165	91.165	91.566	96.787	90.763	99.197	93.574	96.386	96.787	99.197	95.181	96.787	96.386	96.787
MN987231 IBV/ck/EGY-Monuf/USC-3/13 Egypt	96.386	89.558	88.755	88.755	88.755	91.165	88.755	89.96	89.157	93.173	89.558	89.157	89.157	88.755	89.558	92.771	92.771	92.771	92.771	92.771	88.755	89.96	89.157	87.55	89.96	89.96	89.157	89.96	86.747	92.369	88.755	91.968	92.771	91.968	89.96	89.96	89.96	89.96	95.582	89.558	97.189	92.369	95.984	97.189	97.189	93.976	95.582	95.181	96.386
KR608272 LDT3-A/03 China	90.361	96.787	96.787	97.59	95.582	91.968	96.787	97.992	97.189	91.566	95.181	94.779	97.189	97.59	97.992	92.369	92.369	92.369	92.369	92.369	95.582	98.394	97.189	96.386	95.582	95.582	97.189	92.369	95.582	91.566	96.787	91.566	92.369	91.566	97.189	97.189	97.189	96.386	88.755	94.378	90.361	91.968	88.755	87.952	90.361	88.353	89.96	90.763	89.157
MK574042 ck/CH/LHB/110615/19 China	89.558	95.582	96.386	95.984	94.378	90.763	96.386	96.787	95.984	90.361	94.779	94.378	96.787	97.189	96.787	91.165	91.165	91.165	91.165	91.165	94.378	96.386	96.787	96.787	95.181	95.181	96.787	93.173	95.984	90.361	96.386	90.361	91.165	90.361	95.984	95.984	95.984	95.984	88.755	93.976	89.558	90.763	88.755	87.952	89.558	88.353	89.157	90.361	89.157
MK574043 ck/CH/LHB/110627/19 China	89.558	95.582	96.386	95.984	94.378	90.763	96.386	96.787	95.984	90.361	94.779	94.378	96.787	97.189	96.787	91.165	91.165	91.165	91.165	91.165	94.378	96.386	96.787	96.787	95.181	95.181	96.787	93.173	95.984	90.361	96.386	90.361	91.165	90.361	95.984	95.984	95.984	95.984	88.755	93.976	89.558	90.763	88.755	87.952	89.558	88.353	89.157	90.361	89.157
MN548286 D1466/84 UK	94.378	91.968	91.968	91.968	90.763	95.181	91.165	92.369	91.968	94.779	91.165	90.763	90.361	90.763	91.165	96.386	96.386	96.386	96.386	96.386	90.763	92.369	91.566	89.558	91.566	91.566	91.566	93.173	88.755	94.779	91.165	95.582	96.386	95.582	92.369	92.369	92.369	92.369	93.574	92.369	94.378	96.787	95.181	91.968	94.378	94.378	95.984	95.984	92.771
[truncated: 52 more columns]

## Sheet: Nucleocapsid
Table S1j. Nucleotide identities between sequences in the QX dataset (n=101). Nucleocapsid gene.
	KR822424 TCoV/080385d/08 France	OM525802 D532/9/CH/05	KX219797 ck/CH/LXJ/02I/16 China	KX252772 ck/CH/LSHH/03II/16 China	KX252778 ck/CH/LJL/05I/16 China	HQ848267 GX-YL5/05 China	KF411041 CK/CH/LGX/091109/13 China	KP118886 ck/CH/LSD/111235/14 China	KX185058 ck/CH/LGS/08I/16 China	KX219791 ck/CH/LHLJ/07I/16 China	KX219792 ck/CH/LGS/06I/16 China	KX375805 ck/CH/LJS/07V/16 China	KX252789 ck/CH/LHLJ/090605/16 China	KX252777 ck/CH/LSD/07I/16 China	KX364293 ck/CH/LJL/07III/16 China	KX219794 ck/CH/LJS/101109/16 China	KX236009 ck/CH/LSX/130132/16 China	KX259250 ck/CH/LJS/101113/16 China	KX302862 ck/CH/LJS/101111/16 China	KX364299 ck/CH/LSD/101223/16 China	KX236007 ck/CH/LSD/100408/16 China	KX219801 ck/CH/LSD/120437/16 China	MK032181 gCoV/ck/Chi/I0347/11 China	KX275391 ck/CH/LHLJ/140927/16 China	KX219800 ck/CH/LSD/130611/16 China	KX252787 ck/CH/LLN/131040/16/ China	KX252785 ck/CH/LSD/100311/16 China	KY407556 gCoV/ck/Chi/I0114/14 China	MK618759 K047-12/12 Korea	HM245924 CQ04-1/04 China	KX252779 ck/CH/LLN/06I/16 China	MK032177 gCoV/ck/Chi/I0724/17 China	MK032179 gCoV/ck/Chi/I0922/17 China	MK032180 gCoV/ck/China/I0737/17 China	OM525803 D535/4/FR/05	KY933089 1148-A/field/17 UK	MN548289 QX UK	KY933090 L1148/vaccine/17 UK	MK581205 gCoV/Ck/Pol/548/04 Poland	OM525806 D722/SK/06	OM525804 D591/2/GR/05	KX272465 AR251-15/14 Sudan	FN430414 ITA/90254/05 Italy	JQ088078 CK/SWE/065/8946/10 Sweden	KT886454 gCoV/Ck/Pol/74/09 Poland	MK581206 gCoV/Ck/Pol/195/12 Poland	OM525805 D683/HU/06	KX236001 ck/CH/LSD/03I/16 China	KP662631 ck/ZA/3665/11 South Africa
KR822424 TCoV/080385d/08 France	88.049	87.317	86.667	87.805	86.504	87.805	87.398	87.48	87.236	87.561	87.642	88.943	88.211	88.049	88.211	88.293	88.293	88.293	88.374	88.211	86.829	88.211	87.561	87.317	88.455	88.211	87.967	87.561	86.423	88.293	93.496	93.577	93.577	88.293	88.293	88.293	88.293	90.569	90.813	93.902	93.415	94.878	93.984	93.496	91.789	90.976	91.22	91.22	93.577
OM525802 D532/9/CH/05	88.049		93.008	90	97.724	86.829	94.878	93.008	94.472	89.187	94.472	94.472	94.715	96.341	94.228	97.236	97.317	97.317	97.317	97.236	95.772	92.927	96.911	95.203	94.715	95.366	96.748	93.902	94.634	86.748	95.285	86.911	87.154	87.154	99.024	99.024	99.024	99.024	87.886	88.374	88.049	87.236	87.967	88.293	87.561	87.724	90.65	87.724	88.618
KX219797 ck/CH/LXJ/02I/16 China	87.317	93.008		93.171	91.87	88.211	91.545	99.675	93.984	90.488	92.927	92.927	94.228	93.984	96.016	91.626	91.707	91.707	91.707	91.626	93.74	94.878	93.984	93.821	93.089	92.846	93.821	91.138	92.276	87.886	92.927	86.504	86.748	86.748	93.415	93.415	93.415	93.415	86.992	88.049	87.154	86.829	87.48	86.016	86.911	87.317	88.13	87.967	87.48
KX252772 ck/CH/LSHH/03II/16 China	86.667	90	93.171		90.163	89.431	89.593	93.333	90.488	87.724	90.569	90.732	91.626	91.22	91.138	89.837	89.919	89.919	89.919	89.837	91.382	92.439	90.65	91.463	90.407	90.488	90.244	89.024	90.407	89.106	91.382	85.691	85.935	85.935	90.163	90.163	90.163	90.163	86.829	87.48	86.016	85.691	86.911	85.285	86.341	86.179	87.561	87.317	86.423
KX252778 ck/CH/LJL/05I/16 China	87.805	97.724	91.87	90.163		86.504	94.797	92.033	93.659	88.862	94.878	94.797	94.309	95.854	93.089	97.805	97.886	97.886	97.886	97.805	95.935	92.52	95.203	94.878	94.797	95.772	95.041	93.577	94.065	86.585	95.285	86.341	86.585	86.585	97.642	97.642	97.642	97.642	87.561	87.724	87.48	86.585	87.642	87.642	86.911	86.911	90.163	87.154	87.967
HQ848267 GX-YL5/05 China	86.504	86.829	88.211	89.431	86.504		86.748	88.049	86.179	95.61	86.829	86.992	86.911	86.667	86.667	87.236	87.317	87.317	87.317	87.236	86.992	86.829	87.073	86.748	86.341	87.236	87.236	88.618	86.179	96.585	86.992	86.098	86.341	86.341	86.667	86.667	86.667	86.667	87.154	86.829	86.667	86.098	87.236	84.39	86.585	86.667	87.398	87.236	86.992
KF411041 CK/CH/LGX/091109/13 China	87.805	94.878	91.545	89.593	94.797	86.748		91.707	93.74	88.618	94.472	94.39	94.146	95.366	92.927	94.228	94.309	94.309	94.309	94.228	95.285	91.951	95.447	94.797	94.39	95.041	95.285	94.065	93.821	86.423	94.39	86.667	86.748	86.748	94.715	94.715	94.715	94.715	87.886	88.13	87.724	86.748	87.805	87.642	87.561	87.073	90.407	87.317	88.049
KP118886 ck/CH/LSD/111235/14 China	87.398	93.008	99.675	93.333	92.033	88.049	91.707		94.146	90.325	93.089	93.089	94.228	93.984	96.179	91.789	91.87	91.87	91.87	91.789	93.902	95.041	94.146	93.984	93.252	93.008	93.984	91.138	92.358	87.724	93.089	86.585	86.829	86.829	93.577	93.577	93.577	93.577	86.992	88.049	87.236	86.748	87.561	86.098	86.911	87.317	88.293	88.13	87.48
KX185058 ck/CH/LGS/08I/16 China	87.48	94.472	93.984	90.488	93.659	86.179	93.74	94.146		88.049	95.285	95.285	96.179	95.854	95.691	93.089	93.171	93.171	93.171	93.089	95.935	93.252	95.772	96.504	94.959	95.041	95.61	92.439	94.715	85.528	94.39	87.967	88.211	88.211	95.203	95.203	95.203	95.203	87.48	87.805	88.049	88.13	88.049	86.829	87.561	87.48	88.943	87.48	88.374
KX219791 ck/CH/LHLJ/07I/16 China	87.236	89.187	90.488	87.724	88.862	95.61	88.618	90.325	88.049		88.78	88.699	89.268	89.024	88.618	89.837	89.919	89.919	89.919	89.837	89.187	89.268	89.268	89.024	88.537	89.675	89.593	91.301	87.724	96.098	88.699	86.504	86.748	86.748	88.862	88.862	88.862	88.862	87.317	87.154	86.992	86.585	87.48	85.447	87.073	87.317	88.293	88.049	87.805
KX219792 ck/CH/LGS/06I/16 China	87.561	94.472	92.927	90.569	94.878	86.829	94.472	93.089	95.285	88.78		99.431	94.715	95.203	94.146	94.065	94.146	94.146	94.146	94.065	95.447	92.602	94.797	95.528	95.041	95.528	94.959	93.577	93.902	86.341	95.772	87.154	87.398	87.398	94.553	94.553	94.553	94.553	87.724	87.398	88.049	87.236	88.293	86.829	86.748	86.992	90.244	87.073	87.886
KX375805 ck/CH/LJS/07V/16 China	87.642	94.472	92.927	90.732	94.797	86.992	94.39	93.089	95.285	88.699	99.431		94.715	95.203	94.146	93.984	94.065	94.065	94.065	93.984	95.285	92.52	94.797	95.528	95.041	95.447	94.959	93.496	93.902	86.504	95.691	87.073	87.317	87.317	94.553	94.553	94.553	94.553	87.724	87.398	87.967	87.236	88.211	86.748	86.667	86.911	90.163	87.073	87.805
KX252789 ck/CH/LHLJ/090605/16 China	88.943	94.715	94.228	91.626	94.309	86.911	94.146	94.228	96.179	89.268	94.715	94.715		97.724	95.935	93.902	93.984	93.984	93.984	93.902	97.317	93.496	96.423	97.154	95.691	96.016	96.26	93.415	96.179	86.748	94.634	89.106	89.35	89.35	94.797	94.797	94.797	94.797	89.593	88.943	89.431	89.106	89.431	87.073	89.106	89.187	89.675	88.293	89.837
KX252777 ck/CH/LSD/07I/16 China	88.211	96.341	93.984	91.22	95.854	86.667	95.366	93.984	95.854	89.024	95.203	95.203	97.724		95.366	95.285	95.366	95.366	95.366	95.285	98.618	93.984	98.049	98.293	96.748	97.398	97.886	94.39	97.642	86.504	95.447	87.398	87.642	87.642	96.26	96.26	96.26	96.26	88.293	88.862	88.049	87.724	88.049	88.211	87.886	87.724	90.732	87.886	88.537
KX364293 ck/CH/LJL/07III/16 China	88.049	94.228	96.016	91.138	93.089	86.667	92.927	96.179	95.691	88.618	94.146	94.146	95.935	95.366		92.683	92.764	92.764	92.764	92.683	95.122	93.252	95.447	95.447	94.715	94.39	95.285	92.358	93.74	86.26	93.496	87.805	88.049	88.049	94.715	94.715	94.715	94.715	88.374	88.455	88.618	87.967	88.374	86.748	87.886	88.211	89.268	87.886	89.106
KX219794 ck/CH/LJS/101109/16 China	88.211	97.236	91.626	89.837	97.805	87.236	94.228	91.789	93.089	89.837	94.065	93.984	93.902	95.285	92.683		99.919	99.919	99.919	99.837	95.203	91.87	95.041	94.309	94.228	94.878	94.715	94.715	93.496	87.561	94.715	87.561	87.805	87.805	97.154	97.154	97.154	97.154	88.293	88.211	88.374	87.805	88.374	88.13	87.561	87.886	91.301	88.049	88.374
KX236009 ck/CH/LSX/130132/16 China	88.293	97.317	91.707	89.919	97.886	87.317	94.309	91.87	93.171	89.919	94.146	94.065	93.984	95.366	92.764	99.919		100	100	99.919	95.285	91.951	95.122	94.39	94.309	94.959	94.797	94.797	93.577	87.642	94.797	87.642	87.886	87.886	97.236	97.236	97.236	97.236	88.374	88.293	88.455	87.886	88.455	88.211	87.642	87.967	91.382	88.13	88.455
KX259250 ck/CH/LJS/101113/16 China	88.293	97.317	91.707	89.919	97.886	87.317	94.309	91.87	93.171	89.919	94.146	94.065	93.984	95.366	92.764	99.919	100		100	99.919	95.285	91.951	95.122	94.39	94.309	94.959	94.797	94.797	93.577	87.642	94.797	87.642	87.886	87.886	97.236	97.236	97.236	97.236	88.374	88.293	88.455	87.886	88.455	88.211	87.642	87.967	91.382	88.13	88.455
KX302862 ck/CH/LJS/101111/16 China	88.293	97.317	91.707	89.919	97.886	87.317	94.309	91.87	93.171	89.919	94.146	94.065	93.984	95.366	92.764	99.919	100	100		99.919	95.285	91.951	95.122	94.39	94.309	94.959	94.797	94.797	93.577	87.642	94.797	87.642	87.886	87.886	97.236	97.236	97.236	97.236	88.374	88.293	88.455	87.886	88.455	88.211	87.642	87.967	91.382	88.13	88.455
KX364299 ck/CH/LSD/101223/16 China	88.374	97.236	91.626	89.837	97.805	87.236	94.228	91.789	93.089	89.837	94.065	93.984	93.902	95.285	92.683	99.837	99.919	99.919	99.919		95.203	91.87	95.041	94.309	94.228	94.878	94.715	94.715	93.496	87.561	94.715	87.724	87.967	87.967	97.154	97.154	97.154	97.154	88.293	88.211	88.374	87.967	88.374	88.293	87.642	88.049	91.301	88.049	88.537
KX236007 ck/CH/LSD/100408/16 China	88.211	95.772	93.74	91.382	95.935	86.992	95.285	93.902	95.935	89.187	95.447	95.285	97.317	98.618	95.122	95.203	95.285	95.285	95.285	95.203		93.902	97.805	97.886	96.829	97.48	97.642	94.553	97.317	86.829	95.041	87.642	87.886	87.886	95.854	95.854	95.854	95.854	88.049	88.618	88.049	87.967	88.211	88.211	87.48	87.805	90.976	88.13	88.455
KX219801 ck/CH/LSD/120437/16 China	86.829	92.927	94.878	92.439	92.52	86.829	91.951	95.041	93.252	89.268	92.602	92.52	93.496	93.984	93.252	91.87	91.951	91.951	91.951	91.87	93.902		93.659	94.715	93.496	93.659	93.659	91.382	92.927	86.667	93.008	86.098	86.341	86.341	93.008	93.008	93.008	93.008	86.667	87.236	86.585	86.341	87.236	86.829	86.667	87.073	88.699	87.236	86.829
MK032181 gCoV/ck/Chi/I0347/11 China	88.211	96.911	93.984	90.65	95.203	87.073	95.447	94.146	95.772	89.268	94.797	94.797	96.423	98.049	95.447	95.041	95.122	95.122	95.122	95.041	97.805	93.659		97.398	96.504	97.154	99.187	94.797	96.748	87.073	94.959	87.805	88.049	88.049	96.585	96.585	96.585	96.585	88.049	88.862	88.537	88.13	88.293	88.211	87.967	88.049	91.138	88.211	88.699
KX275391 ck/CH/LHLJ/140927/16 China	87.561	95.203	93.821	91.463	94.878	86.748	94.797	93.984	96.504	89.024	95.528	95.528	97.154	98.293	95.447	94.309	94.39	94.39	94.39	94.309	97.886	94.715	97.398		96.585	96.911	97.073	93.74	97.48	86.504	95.122	87.317	87.561	87.561	95.285	95.285	95.285	95.285	87.398	88.455	87.642	87.642	87.724	87.561	87.398	87.317	90.081	88.049	88.13
KX219800 ck/CH/LSD/130611/16 China	87.317	94.715	93.089	90.407	94.797	86.341	94.39	93.252	94.959	88.537	95.041	95.041	95.691	96.748	94.715	94.228	94.309	94.309	94.309	94.228	96.829	93.496	96.504	96.585		96.911	96.179	93.984	95.285	86.098	94.472	86.667	86.911	86.911	94.634	94.634	94.634	94.634	86.992	87.317	87.236	86.992	87.967	87.073	86.829	86.829	89.675	87.724	87.48
KX252787 ck/CH/LLN/131040/16/ China	88.455	95.366	92.846	90.488	95.772	87.236	95.041	93.008	95.041	89.675	95.528	95.447	96.016	97.398	94.39	94.878	94.959	94.959	94.959	94.878	97.48	93.659	97.154	96.911	96.911		96.667	94.959	95.772	87.236	94.878	87.398	87.642	87.642	95.285	95.285	95.285	95.285	88.049	88.374	88.13	87.642	88.699	88.293	87.886	88.049	90.569	87.724	88.78
KX252785 ck/CH/LSD/100311/16 China	88.211	96.748	93.821	90.244	95.041	87.236	95.285	93.984	95.61	89.593	94.959	94.959	96.26	97.886	95.285	94.715	94.797	94.797	94.797	94.715	97.642	93.659	99.187	97.073	96.179	96.667		94.797	96.423	87.236	94.797	87.561	87.805	87.805	96.423	96.423	96.423	96.423	87.886	88.537	88.293	87.886	88.211	88.13	87.724	87.724	90.976	88.049	88.537
KY407556 gCoV/ck/Chi/I0114/14 China	87.967	93.902	91.138	89.024	93.577	88.618	94.065	91.138	92.439	91.301	93.577	93.496	93.415	94.39	92.358	94.715	94.797	94.797	94.797	94.715	94.553	91.382	94.797	93.74	93.984	94.959	94.797		92.927	88.943	93.415	87.724	87.967	87.967	93.902	93.902	93.902	93.902	88.537	87.805	88.537	87.886	88.862	88.049	87.642	88.455	91.301	88.537	88.455
MK618759 K047-12/12 Korea	87.561	94.634	92.276	90.407	94.065	86.179	93.821	92.358	94.715	87.724	93.902	93.902	96.179	97.642	93.74	93.496	93.577	93.577	93.577	93.496	97.317	92.927	96.748	97.48	95.285	95.772	96.423	92.927		85.691	93.659	87.236	87.48	87.48	94.634	94.634	94.634	94.634	86.748	87.967	87.724	87.561	87.724	87.724	86.829	86.423	89.35	88.211	86.911
HM245924 CQ04-1/04 China	86.423	86.748	87.886	89.106	86.585	96.585	86.423	87.724	85.528	96.098	86.341	86.504	86.748	86.504	86.26	87.561	87.642	87.642	87.642	87.561	86.829	86.667	87.073	86.504	86.098	87.236	87.236	88.943	85.691		86.667	85.854	86.098	86.098	86.504	86.504	86.504	86.504	86.911	86.667	86.504	85.854	86.829	84.472	86.423	86.179	87.398	86.992	87.154
KX252779 ck/CH/LLN/06I/16 China	88.293	95.285	92.927	91.382	95.285	86.992	94.39	93.089	94.39	88.699	95.772	95.691	94.634	95.447	93.496	94.715	94.797	94.797	94.797	94.715	95.041	93.008	94.959	95.122	94.472	94.878	94.797	93.415	93.659	86.667		86.585	86.829	86.829	95.366	95.366	95.366	95.366	88.374	88.211	87.805	86.667	88.537	87.073	87.886	87.805	90.081	87.48	88.211
MK032177 gCoV/ck/Chi/I0724/17 China	93.496	86.911	86.504	85.691	86.341	86.098	86.667	86.585	87.967	86.504	87.154	87.073	89.106	87.398	87.805	87.561	87.642	87.642	87.642	87.724	87.642	86.098	87.805	87.317	86.667	87.398	87.561	87.724	87.236	85.854	86.585		99.756	99.756	87.236	87.236	87.236	87.236	90.163	90.488	96.667	99.106	93.902	90.407	91.951	92.358	92.276	90.407	92.033
MK032179 gCoV/ck/Chi/I0922/17 China	93.577	87.154	86.748	85.935	86.585	86.341	86.748	86.829	88.211	86.748	87.398	87.317	89.35	87.642	88.049	87.805	87.886	87.886	87.886	87.967	87.886	86.341	88.049	87.561	86.911	87.642	87.805	87.967	87.48	86.098	86.829	99.756		100	87.48	87.48	87.48	87.48	90.407	90.569	96.911	99.35	93.984	90.65	92.033	92.602	92.358	90.488	92.114
MK032180 gCoV/ck/China/I0737/17 China	93.577	87.154	86.748	85.935	86.585	86.341	86.748	86.829	88.211	86.748	87.398	87.317	89.35	87.642	88.049	87.805	87.886	87.886	87.886	87.967	87.886	86.341	88.049	87.561	86.911	87.642	87.805	87.967	87.48	86.098	86.829	99.756	100		87.48	87.48	87.48	87.48	90.407	90.569	96.911	99.35	93.984	90.65	92.033	92.602	92.358	90.488	92.114
OM525803 D535/4/FR/05	88.293	99.024	93.415	90.163	97.642	86.667	94.715	93.577	95.203	88.862	94.553	94.553	94.797	96.26	94.715	97.154	97.236	97.236	97.236	97.154	95.854	93.008	96.585	95.285	94.634	95.285	96.423	93.902	94.634	86.504	95.366	87.236	87.48	87.48		100	100	100	87.724	88.537	88.211	87.398	88.211	88.374	87.724	87.561	90.813	87.886	88.455
KY933089 1148-A/field/17 UK	88.293	99.024	93.415	90.163	97.642	86.667	94.715	93.577	95.203	88.862	94.553	94.553	94.797	96.26	94.715	97.154	97.236	97.236	97.236	97.154	95.854	93.008	96.585	95.285	94.634	95.285	96.423	93.902	94.634	86.504	95.366	87.236	87.48	87.48	100		100	100	87.724	88.537	88.211	87.398	88.211	88.374	87.724	87.561	90.813	87.886	88.455
MN548289 QX UK	88.293	99.024	93.415	90.163	97.642	86.667	94.715	93.577	95.203	88.862	94.553	94.553	94.797	96.26	94.715	97.154	97.236	97.236	97.236	97.154	95.854	93.008	96.585	95.285	94.634	95.285	96.423	93.902	94.634	86.504	95.366	87.236	87.48	87.48	100	100		100	87.724	88.537	88.211	87.398	88.211	88.374	87.724	87.561	90.813	87.886	88.455
KY933090 L1148/vaccine/17 UK	88.293	99.024	93.415	90.163	97.642	86.667	94.715	93.577	95.203	88.862	94.553	94.553	94.797	96.26	94.715	97.154	97.236	97.236	97.236	97.154	95.854	93.008	96.585	95.285	94.634	95.285	96.423	93.902	94.634	86.504	95.366	87.236	87.48	87.48	100	100	100		87.724	88.537	88.211	87.398	88.211	88.374	87.724	87.561	90.813	87.886	88.455
MK581205 gCoV/Ck/Pol/548/04 Poland	90.569	87.886	86.992	86.829	87.561	87.154	87.886	86.992	87.48	87.317	87.724	87.724	89.593	88.293	88.374	88.293	88.374	88.374	88.374	88.293	88.049	86.667	88.049	87.398	86.992	88.049	87.886	88.537	86.748	86.911	88.374	90.163	90.407	90.407	87.724	87.724	87.724	87.724		93.252	91.789	90.081	90.894	88.374	93.415	92.52	90.732	90.488	92.358
OM525806 D722/SK/06	90.813	88.374	88.049	87.48	87.724	86.829	88.13	88.049	87.805	87.154	87.398	87.398	88.943	88.862	88.455	88.211	88.293	88.293	88.293	88.211	88.618	87.236	88.862	88.455	87.317	88.374	88.537	87.805	87.967	86.667	88.211	90.488	90.569	90.569	88.537	88.537	88.537	88.537	93.252		91.22	90.569	90.813	89.024	92.439	91.789	90.813	90.081	90.569
OM525804 D591/2/GR/05	93.902	88.049	87.154	86.016	87.48	86.667	87.724	87.236	88.049	86.992	88.049	87.967	89.431	88.049	88.618	88.374	88.455	88.455	88.455	88.374	88.049	86.585	88.537	87.642	87.236	88.13	88.293	88.537	87.724	86.504	87.805	96.667	96.911	96.911	88.211	88.211	88.211	88.211	91.789	91.22		96.585	95.528	90.813	92.276	91.463	92.764	90.894	92.276
KX272465 AR251-15/14 Sudan	93.415	87.236	86.829	85.691	86.585	86.098	86.748	86.748	88.13	86.585	87.236	87.236	89.106	87.724	87.967	87.805	87.886	87.886	87.886	87.967	87.967	86.341	88.13	87.642	86.992	87.642	87.886	87.886	87.561	85.854	86.667	99.106	99.35	99.35	87.398	87.398	87.398	87.398	90.081	90.569	96.585		93.659	90.65	91.707	92.276	92.358	90.569	91.789
FN430414 ITA/90254/05 Italy	94.878	87.967	87.48	86.911	87.642	87.236	87.805	87.561	88.049	87.48	88.293	88.211	89.431	88.049	88.374	88.374	88.455	88.455	88.455	88.374	88.211	87.236	88.293	87.724	87.967	88.699	88.211	88.862	87.724	86.829	88.537	93.902	93.984	93.984	88.211	88.211	88.211	88.211	90.894	90.813	95.528	93.659		91.707	93.171	90.894	90.976	91.057	91.463
JQ088078 CK/SWE/065/8946/10 Sweden	93.984	88.293	86.016	85.285	87.642	84.39	87.642	86.098	86.829	85.447	86.829	86.748	87.073	88.211	86.748	88.13	88.211	88.211	88.211	88.293	88.211	86.829	88.211	87.561	87.073	88.293	88.13	88.049	87.724	84.472	87.073	90.407	90.65	90.65	88.374	88.374	88.374	88.374	88.374	89.024	90.813	90.65	91.707		90.163	89.756	91.707	89.431	89.106
KT886454 gCoV/Ck/Pol/74/09 Poland	93.496	87.561	86.911	86.341	86.911	86.585	87.561	86.911	87.561	87.073	86.748	86.667	89.106	87.886	87.886	87.561	87.642	87.642	87.642	87.642	87.48	86.667	87.967	87.398	86.829	87.886	87.724	87.642	86.829	86.423	87.886	91.951	92.033	92.033	87.724	87.724	87.724	87.724	93.415	92.439	92.276	91.707	93.171	90.163		92.276	89.593	90	90.813
MK581206 gCoV/Ck/Pol/195/12 Poland	91.789	87.724	87.317	86.179	86.911	86.667	87.073	87.317	87.48	87.317	86.992	86.911	89.187	87.724	88.211	87.886	87.967	87.967	87.967	88.049	87.805	87.073	88.049	87.317	86.829	88.049	87.724	88.455	86.423	86.179	87.805	92.358	92.602	92.602	87.561	87.561	87.561	87.561	92.52	91.789	91.463	92.276	90.894	89.756	92.276		91.463	89.837	91.87
OM525805 D683/HU/06	90.976	90.65	88.13	87.561	90.163	87.398	90.407	88.293	88.943	88.293	90.244	90.163	89.675	90.732	89.268	91.301	91.382	91.382	91.382	91.301	90.976	88.699	91.138	90.081	89.675	90.569	90.976	91.301	89.35	87.398	90.081	92.276	92.358	92.358	90.813	90.813	90.813	90.813	90.732	90.813	92.764	92.358	90.976	91.707	89.593	91.463		90.569	91.545
KX236001 ck/CH/LSD/03I/16 China	91.22	87.724	87.967	87.317	87.154	87.236	87.317	88.13	87.48	88.049	87.073	87.073	88.293	87.886	87.886	88.049	88.13	88.13	88.13	88.049	88.13	87.236	88.211	88.049	87.724	87.724	88.049	88.537	88.211	86.992	87.48	90.407	90.488	90.488	87.886	87.886	87.886	87.886	90.488	90.081	90.894	90.569	91.057	89.431	90	89.837	90.569		90.569
KP662631 ck/ZA/3665/11 South Africa	91.22	88.618	87.48	86.423	87.967	86.992	88.049	87.48	88.374	87.805	87.886	87.805	89.837	88.537	89.106	88.374	88.455	88.455	88.455	88.537	88.455	86.829	88.699	88.13	87.48	88.78	88.537	88.455	86.911	87.154	88.211	92.033	92.114	92.114	88.455	88.455	88.455	88.455	92.358	90.569	92.276	91.789	91.463	89.106	90.813	91.87	91.545	90.569
KF377577 4/91 vaccine China	93.577	87.154	86.748	85.935	86.585	86.341	86.748	86.829	88.211	86.748	87.398	87.317	89.35	87.642	88.049	87.805	87.886	87.886	87.886	87.967	87.886	86.341	88.049	87.561	86.911	87.642	87.805	87.967	87.48	86.098	86.829	99.756	100	100	87.48	87.48	87.48	87.48	90.407	90.569	96.911	99.35	93.984	90.65	92.033	92.602	92.358	90.488	92.114
KP118881 ck/CH/LBJ/140413/14 China	93.496	87.154	86.748	85.935	86.585	86.341	86.748	86.829	88.211	86.748	87.398	87.317	89.35	87.642	88.049	87.805	87.886	87.886	87.886	87.967	87.886	86.341	88.049	87.561	86.911	87.642	87.805	87.967	87.48	86.098	86.829	99.675	99.919	99.919	87.48	87.48	87.48	87.48	90.407	90.488	96.829	99.268	93.902	90.569	91.951	92.683	92.276	90.407	92.033
KP118880 ck/CH/LHB/130927/14 China	93.577	87.154	86.748	85.935	86.585	86.341	86.748	86.829	88.211	86.748	87.398	87.317	89.35	87.642	88.049	87.805	87.886	87.886	87.886	87.967	87.886	86.341	88.049	87.561	86.911	87.642	87.805	87.967	87.48	86.098	86.829	99.756	100	100	87.48	87.48	87.48	87.48	90.407	90.569	96.911	99.35	93.984	90.65	92.033	92.602	92.358	90.488	92.114
KP118888 ck/CH/LLN/130102/15 China	93.577	87.154	86.748	85.935	86.585	86.341	86.748	86.829	88.211	86.748	87.398	87.317	89.35	87.642	88.049	87.805	87.886	87.886	87.886	87.967	87.886	86.341	88.049	87.561	86.911	87.642	87.805	87.967	87.48	86.098	86.829	99.756	100	100	87.48	87.48	87.48	87.48	90.407	90.569	96.911	99.35	93.984	90.65	92.033	92.602	92.358	90.488	92.114
MZ367369 IBV/Ck/Bel/4134_001/19 Belgium	93.577	87.154	86.748	85.935	86.585	86.341	86.748	86.829	88.211	86.748	87.398	87.317	89.35	87.642	88.049	87.805	87.886	87.886	87.886	87.967	87.886	86.341	88.049	87.561	86.911	87.642	87.805	87.967	87.48	86.098	86.829	99.756	100	100	87.48	87.48	87.48	87.48	90.407	90.569	96.911	99.35	93.984	90.65	92.033	92.602	92.358	90.488	92.114
KP118884 ck/CH/LSD/110651/15 China	93.577	87.154	86.748	85.935	86.585	86.341	86.748	86.829	88.211	86.748	87.398	87.317	89.35	87.642	88.049	87.805	87.886	87.886	87.886	87.967	87.886	86.341	88.049	87.561	86.911	87.642	87.805	87.967	87.48	86.098	86.829	99.756	100	100	87.48	87.48	87.48	87.48	90.407	90.569	96.911	99.35	93.984	90.65	92.033	92.602	92.358	90.488	92.114
KP118882 ck/CH/LBJ/140402/14 China	93.496	87.073	86.748	85.935	86.504	86.341	86.667	86.829	88.13	86.748	87.317	87.236	89.268	87.561	87.967	87.724	87.805	87.805	87.805	87.886	87.805	86.341	87.967	87.48	86.829	87.561	87.724	87.886	87.398	86.098	86.748	99.675	99.919	99.919	87.398	87.398	87.398	87.398	90.325	90.488	96.829	99.268	93.902	90.569	91.951	92.52	92.276	90.407	92.033
KP118892 ck/CH/LLN/120101 China	93.577	87.154	86.748	85.935	86.585	86.341	86.748	86.829	88.211	86.748	87.398	87.317	89.35	87.642	88.049	87.805	87.886	87.886	87.886	87.967	87.886	86.341	88.049	87.561	86.911	87.642	87.805	87.967	87.48	86.098	86.829	99.756	100	100	87.48	87.48	87.48	87.48	90.407	90.569	96.911	99.35	93.984	90.65	92.033	92.602	92.358	90.488	92.114
KP118891 ck/CH/LHLJ/111246/14 China	93.577	87.154	86.748	85.935	86.585	86.341	86.748	86.829	88.211	86.748	87.398	87.317	89.35	87.642	88.049	87.805	87.886	87.886	87.886	87.967	87.886	86.341	88.049	87.561	86.911	87.642	87.805	87.967	87.48	86.098	86.829	99.756	100	100	87.48	87.48	87.48	87.48	90.407	90.569	96.911	99.35	93.984	90.65	92.033	92.602	92.358	90.488	92.114
KP118893 ck/CH/LSD/110410/14 China	93.577	87.154	86.748	85.935	86.585	86.341	86.748	86.829	88.211	86.748	87.398	87.317	89.35	87.642	88.049	87.805	87.886	87.886	87.886	87.967	87.886	86.341	88.049	87.561	86.911	87.642	87.805	87.967	87.48	86.098	86.829	99.756	100	100	87.48	87.48	87.48	87.48	90.407	90.569	96.911	99.35	93.984	90.65	92.033	92.602	92.358	90.488	92.114
KP036503 ck/CH/LHB/121010 China	93.496	87.236	86.667	85.854	86.504	86.26	86.667	86.748	88.13	86.667	87.317	87.236	89.268	87.561	87.967	87.724	87.805	87.805	87.805	87.886	87.805	86.26	87.967	87.48	86.829	87.561	87.724	87.886	87.398	86.016	86.748	99.675	99.919	99.919	87.398	87.398	87.398	87.398	90.325	90.488	96.829	99.268	93.902	90.732	91.951	92.52	92.276	90.569	92.033
KP036504 ck/CH/LHB/130630 China	93.496	87.073	86.667	85.854	86.504	86.26	86.667	86.748	88.13	86.667	87.317	87.236	89.268	87.561	87.967	87.724	87.805	87.805	87.805	87.886	87.805	86.423	87.967	87.48	86.829	87.724	87.724	87.886	87.398	86.179	86.748	99.675	99.919	99.919	87.398	87.398	87.398	87.398	90.325	90.488	96.829	99.268	93.902	90.569	91.951	92.52	92.276	90.407	92.033
KP118883 ck/CH/LHB/121041 China	93.252	86.829	86.423	85.61	86.26	86.016	86.423	86.504	87.886	86.423	87.073	86.992	89.024	87.317	87.724	87.48	87.561	87.561	87.561	87.642	87.561	86.016	87.724	87.236	86.585	87.317	87.48	87.642	87.154	85.772	86.504	99.431	99.675	99.675	87.154	87.154	87.154	87.154	90.081	90.244	96.585	99.024	93.659	90.325	91.707	92.276	92.033	90.163	91.789
KP118887 ck/CH/LHB/140532/14 China	93.577	87.154	86.748	85.935	86.585	86.341	86.748	86.829	88.211	86.748	87.398	87.317	89.35	87.642	88.049	87.805	87.886	87.886	87.886	87.967	87.886	86.341	88.049	87.561	86.911	87.642	87.805	87.967	87.48	86.098	86.829	99.756	100	100	87.48	87.48	87.48	87.48	90.407	90.569	96.911	99.35	93.984	90.65	92.033	92.602	92.358	90.488	92.114
KP118885 ck/CH/LSD/110857/14 China	93.496	87.073	86.667	85.854	86.504	86.26	86.667	86.748	88.13	86.667	87.317	87.236	89.268	87.561	87.967	87.724	87.805	87.805	87.805	87.886	87.805	86.26	87.967	87.48	86.829	87.561	87.724	87.886	87.398	86.016	86.748	99.675	99.919	99.919	87.398	87.398	87.398	87.398	90.325	90.488	96.829	99.268	93.902	90.569	91.951	92.52	92.276	90.407	92.033
KP036502 ck/CH/LHLJ/140906 China	93.333	86.911	86.504	86.016	86.341	86.098	86.504	86.585	87.967	86.504	87.154	87.073	89.106	87.398	87.805	87.561	87.642	87.642	87.642	87.724	87.642	86.098	87.805	87.317	86.667	87.398	87.561	87.724	87.236	85.854	86.585	99.512	99.756	99.756	87.236	87.236	87.236	87.236	90.325	90.325	96.667	99.106	93.74	90.569	91.789	92.439	92.276	90.407	91.87
KJ135013 IBVUkr27/11 Ukraine	93.74	87.073	87.073	86.098	86.667	86.423	86.992	87.073	87.398	86.667	87.154	87.073	88.537	87.154	88.13	87.398	87.48	87.48	87.48	87.398	87.317	86.341	87.642	87.073	86.748	87.724	87.236	87.561	86.992	86.016	87.317	94.065	94.309	94.309	87.073	87.073	87.073	87.073	92.033	91.22	95.447	93.821	94.797	90.894	92.358	92.195	90.732	91.22	91.22
KJ425496 ck/CH/LHB/130573 China	87.398	94.39	91.789	90.732	94.553	86.911	94.553	91.789	93.333	88.943	94.309	94.228	93.74	94.878	92.276	93.984	94.065	94.065	94.065	93.984	94.228	92.195	93.821	94.39	93.74	93.902	93.659	93.008	92.846	86.992	96.016	86.26	86.341	86.341	94.146	94.146	94.146	94.146	87.154	87.236	86.667	86.179	87.48	87.236	87.154	86.341	89.187	87.48	87.398
KP343691 ck/CH/LGX/130530 China	87.317	94.309	91.707	90.65	94.472	86.829	94.472	91.707	93.252	88.862	94.228	94.146	93.659	94.797	92.195	93.902	93.984	93.984	93.984	93.902	94.146	92.276	93.74	94.309	93.659	93.984	93.577	92.927	92.764	87.073	95.935	86.179	86.26	86.26	94.065	94.065	94.065	94.065	87.073	87.154	86.585	86.098	87.398	87.154	87.073	86.26	89.106	87.398	87.317
KT736032 ck/CHLDL150434-II/16 China	86.667	93.984	90.894	90.325	94.309	86.423	94.309	91.057	92.927	88.374	93.74	93.659	93.089	94.309	91.789	93.74	93.821	93.821	93.821	93.74	94.146	91.789	93.577	94.309	93.171	93.659	93.415	92.764	92.683	86.585	95.041	85.528	85.61	85.61	93.902	93.902	93.902	93.902	86.585	86.504	85.935	85.447	86.667	86.992	86.341	85.772	89.024	86.829	87.154
KU356856 ck/CH/SCYB/140913/25 China	89.024	90.488	88.862	89.187	91.057	86.179	91.057	89.024	90.569	86.341	91.22	91.138	92.358	91.057	90.488	90.325	90.407	90.407	90.407	90.325	90.894	89.35	90.325	90.894	90.407	90.488	90.163	89.593	91.87	85.935	92.358	88.374	88.455	88.455	90.569	90.569	90.569	90.569	88.13	86.911	88.78	88.13	89.756	87.48	88.537	87.154	88.374	89.187	88.862
MT505388 CK/CH/SCMY/160315/20 China	91.138	88.293	87.724	87.561	88.699	86.179	88.455	87.886	89.106	86.341	88.943	88.862	90.732	89.024	89.024	88.293	88.374	88.374	88.374	88.293	89.106	88.211	89.024	89.024	88.374	88.862	88.862	87.317	90	85.691	89.187	93.74	93.984	93.984	88.374	88.374	88.374	88.374	90.407	89.106	93.659	93.333	91.463	88.943	90.081	90.081	90.894	90.488	91.057
KJ425497 ck/CH/LHB/130598/14 China	93.496	87.073	86.667	85.854	86.504	86.26	86.667	86.748	88.13	86.667	87.317	87.236	89.268	87.561	87.967	87.724	87.805	87.805	87.805	87.886	87.805	86.26	87.967	87.48	86.829	87.561	87.724	87.886	87.398	86.016	86.748	99.675	99.919	99.919	87.398	87.398	87.398	87.398	90.325	90.488	96.829	99.268	93.902	90.569	91.951	92.52	92.276	90.407	92.033
FN430415 NGA/A116E7/06 Nigeria	90.325	88.293	87.236	86.829	87.724	88.211	87.805	87.398	87.236	88.293	87.236	87.154	88.618	88.049	87.724	88.374	88.455	88.455	88.455	88.374	88.211	87.317	88.78	88.374	87.642	88.618	88.293	88.78	88.049	87.642	87.561	90.813	91.057	91.057	88.374	88.374	88.374	88.374	90.488	90.976	91.463	90.732	91.301	88.537	89.675	92.114	91.138	91.301	91.138
KR231009 B1648/84 Belgium	92.033	87.724	87.561	87.561	87.642	86.748	87.561	87.724	87.805	87.724	87.805	87.724	88.943	88.374	88.211	88.374	88.455	88.455	88.455	88.537	88.374	87.642	88.618	88.293	87.724	88.862	88.455	88.374	87.724	87.154	88.211	91.789	92.033	92.033	87.967	87.967	87.967	87.967	91.22	91.301	91.87	91.545	91.789	89.837	91.626	92.764	91.463	92.195	91.463
MN548285 CR88 (4/91)/88 France	92.602	87.154	86.504	86.423	86.504	85.691	86.667	86.585	87.805	86.26	86.992	86.992	88.699	87.154	87.886	86.829	86.911	86.911	86.911	86.911	87.073	86.504	87.48	87.073	86.423	87.154	87.48	87.317	86.667	85.61	87.48	91.138	91.382	91.382	87.48	87.48	87.48	87.48	91.463	89.837	91.301	90.976	92.033	90.488	93.171	92.033	90.325	89.675	90.732
MN548288 Italy02/02 Italy	94.797	88.049	87.398	87.073	87.561	87.154	87.561	87.48	87.967	87.561	87.642	87.561	89.106	88.049	88.537	87.886	87.967	87.967	87.967	87.967	87.805	87.236	88.211	87.805	87.154	88.13	88.211	88.13	88.293	86.748	88.211	91.463	91.545	91.545	88.293	88.293	88.293	88.293	90.976	90.163	91.789	91.301	94.553	91.87	94.146	91.626	90.244	92.033	91.057
MG021194 gCoV/Ck/IT/624I/96 Italy	92.52	87.561	87.073	86.585	87.073	87.073	87.398	87.154	87.317	87.48	87.48	87.561	89.024	87.724	87.967	88.049	88.13	88.13	88.13	88.049	88.049	86.26	88.293	87.398	87.073	88.211	87.886	88.455	87.48	87.073	87.805	93.333	93.577	93.577	87.805	87.805	87.805	87.805	92.114	91.301	94.878	93.089	94.634	90.813	91.301	91.87	91.789	91.22	91.87
KU900739 QIA-03342/03 Korea	91.22	88.049	88.211	87.642	87.886	86.748	88.455	88.374	88.537	87.398	88.293	88.293	89.675	88.537	89.35	88.862	88.943	88.943	88.943	88.862	88.862	88.049	88.862	88.537	87.886	88.862	88.537	88.862	87.073	86.585	88.211	91.138	91.382	91.382	88.211	88.211	88.211	88.211	91.057	90.65	91.951	91.057	91.545	88.537	90.65	91.463	91.057	91.626	90.569
KU900744 QIA-Q43/06 Korea	90.488	87.398	87.642	87.154	86.911	86.911	87.805	87.805	87.967	87.48	87.805	87.724	89.106	87.967	88.374	88.049	88.13	88.13	88.13	88.049	88.211	87.154	88.374	88.13	87.317	87.805	88.049	88.211	86.829	86.992	87.642	90.488	90.732	90.732	87.561	87.561	87.561	87.561	90.813	89.837	91.057	90.244	90.732	88.618	90.163	90.65	90.65	91.463	90.163
KJ425504 ck/CH/LHJL/091205 China	90.407	87.398	87.642	87.154	86.992	86.992	87.48	87.805	87.236	87.724	86.911	86.911	88.13	87.886	87.805	87.886	87.967	87.967	87.967	87.886	87.967	87.398	88.13	87.805	87.561	87.561	87.886	88.211	87.398	86.748	87.236	89.675	89.756	89.756	87.724	87.724	87.724	87.724	90.407	89.675	90.569	89.837	90.488	88.618	89.919	89.919	90.244	97.561	90.407
MH539771 IBV/SES/15AB-01 Canada	90.407	87.398	87.642	87.154	86.992	86.992	87.48	87.805	87.236	87.724	86.911	86.911	88.13	87.886	87.805	87.886	87.967	87.967	87.967	87.886	87.967	87.398	88.13	87.805	87.561	87.561	87.886	88.211	87.398	86.748	87.236	89.675	89.756	89.756	87.724	87.724	87.724	87.724	90.407	89.675	90.569	89.837	90.488	88.618	89.919	89.919	90.244	97.561	90.407
MH539772 IBV/SES/15SK-02 Canada	90.569	87.561	87.805	87.154	87.154	87.154	87.642	87.967	87.398	87.886	87.073	87.073	88.293	88.049	87.967	88.049	88.13	88.13	88.13	88.049	88.13	87.398	88.293	87.967	87.724	87.724	88.049	88.374	87.561	86.911	87.398	89.837	89.919	89.919	87.886	87.886	87.886	87.886	90.569	89.837	90.732	90	90.65	88.78	90.081	90.081	90.407	97.724	90.569
MK937830 M41/19 China	90.569	87.561	87.805	87.154	87.154	87.154	87.48	87.967	87.398	87.886	86.911	86.911	88.293	88.049	87.967	88.049	88.13	88.13	88.13	88.049	88.13	87.398	88.293	87.967	87.724	87.724	88.049	88.374	87.561	86.911	87.398	89.756	89.837	89.837	87.886	87.886	87.886	87.886	90.569	89.837	90.65	89.919	90.813	88.943	90.081	90.081	90.325	97.724	90.732
MW446887 IBV/M41/Y192 China	90.569	87.561	87.805	87.154	87.154	87.154	87.48	87.967	87.398	87.886	86.911	86.911	88.293	88.049	87.967	88.049	88.13	88.13	88.13	88.049	88.13	87.398	88.293	87.967	87.724	87.724	88.049	88.374	87.561	86.911	87.398	89.756	89.837	89.837	87.886	87.886	87.886	87.886	90.569	89.837	90.65	89.919	90.813	88.943	90.081	90.081	90.325	97.724	90.732
MW429061 IBV/M41/Y28 China	90.569	87.561	87.805	87.154	87.154	87.154	87.48	87.967	87.398	87.886	86.911	86.911	88.293	88.049	87.967	88.049	88.13	88.13	88.13	88.049	88.13	87.398	88.293	87.967	87.724	87.724	88.049	88.374	87.561	86.911	87.398	89.756	89.837	89.837	87.886	87.886	87.886	87.886	90.569	89.837	90.65	89.919	90.813	88.943	90.081	90.081	90.325	97.724	90.732
MW446888 IBV/M41/Y27 China	90.569	87.561	87.805	87.154	87.154	87.154	87.48	87.967	87.398	87.886	86.911	86.911	88.293	88.049	87.967	88.049	88.13	88.13	88.13	88.049	88.13	87.398	88.293	87.967	87.724	87.724	88.049	88.374	87.561	86.911	87.398	89.756	89.837	89.837	87.886	87.886	87.886	87.886	90.569	89.837	90.65	89.919	90.813	88.943	90.081	90.081	90.325	97.724	90.732
MW429062 IBV/M41/N56 China	90.488	87.48	87.724	87.073	87.073	87.073	87.398	87.886	87.317	87.805	86.829	86.829	88.211	87.967	87.886	87.967	88.049	88.049	88.049	87.967	88.049	87.317	88.211	87.886	87.642	87.642	87.967	88.293	87.48	86.829	87.317	89.675	89.756	89.756	87.805	87.805	87.805	87.805	90.488	89.756	90.569	89.837	90.732	88.862	90	90	90.244	97.642	90.65
MK728875 M41-CK/17 UK	90.569	87.561	87.805	87.154	87.154	87.154	87.48	87.967	87.398	87.886	86.911	86.911	88.293	88.049	87.967	88.049	88.13	88.13	88.13	88.049	88.13	87.398	88.293	87.967	87.724	87.724	88.049	88.374	87.561	86.911	87.398	89.756	89.837	89.837	87.886	87.886	87.886	87.886	90.569	89.837	90.65	89.919	90.813	88.943	90.081	90.081	90.325	97.724	90.732
KJ435286 ck/CH/LSD/1112150 China	90.488	87.48	87.724	87.073	87.073	87.073	87.398	87.886	87.317	87.805	86.829	86.829	88.211	87.967	87.886	87.967	88.049	88.049	88.049	87.967	88.049	87.317	88.211	87.886	87.642	87.642	87.967	88.293	87.48	86.829	87.317	89.675	89.756	89.756	87.805	87.805	87.805	87.805	90.488	89.756	90.569	89.837	90.732	88.862	90	90	90.244	97.642	90.65
KY047602 gCoV/Ck/Pol/G052/16 Poland	93.252	87.886	86.992	86.179	87.724	86.098	87.073	87.073	87.48	86.667	87.154	87.073	88.293	87.398	87.724	88.862	88.943	88.943	88.943	89.024	87.48	86.423	87.642	86.992	86.992	87.967	87.398	87.886	87.073	85.854	87.317	93.008	93.089	93.089	87.886	87.886	87.886	87.886	90.407	90.894	92.764	92.927	93.008	92.358	91.545	91.301	91.87	90.894	91.057
MK581207 gCoV/Ck/Pol/G103/16 Poland	92.764	88.049	87.154	86.585	87.967	86.423	87.236	87.236	87.48	87.236	87.561	87.48	88.211	87.642	87.724	89.106	89.187	89.187	89.187	89.268	87.724	86.585	87.724	87.398	86.992	88.13	87.561	88.13	86.992	86.504	87.724	92.276	92.358	92.358	88.049	88.049	88.049	88.049	90.244	91.545	92.033	92.195	92.195	92.033	90.976	91.22	92.114	91.057	91.22
MK581208 gCoV/Ck/Pol/G225/17 Poland	92.846	88.618	88.374	87.398	88.374	87.724	88.699	88.455	88.618	88.537	89.106	89.024	90.163	88.943	89.35	89.024	89.106	89.106	89.106	89.024	88.78	87.236	88.943	88.455	87.967	89.268	88.943	88.943	87.561	87.317	89.024	93.577	93.659	93.659	88.862	88.862	88.862	88.862	92.033	92.114	93.984	93.333	93.821	89.187	92.358	92.764	92.927	91.138	92.033
MK581202 gCoV/Ck/Pol/80/89 Poland	90.325	88.862	87.805	87.398	88.211	86.829	88.455	87.967	88.13	87.561	88.13	88.049	89.187	89.187	88.537	89.024	89.106	89.106	89.106	89.024	88.862	87.886	89.593	89.106	88.618	89.35	89.268	88.862	88.049	86.748	88.455	90.488	90.569	90.569	88.78	88.78	88.78	88.78	91.626	92.114	90.488	90.244	90.65	88.455	91.626	92.033	91.382	90.163	91.138
MK581203 gCoV/Ck/Pol/162/97 Poland	90.081	88.211	87.317	87.073	87.561	85.935	87.724	87.317	86.748	86.423	87.398	87.398	88.537	88.293	87.561	88.211	88.293	88.293	88.293	88.374	87.967	87.073	88.374	87.724	87.398	88.293	88.049	88.374	86.911	85.935	87.967	91.138	91.382	91.382	88.049	88.049	88.049	88.049	91.463	91.707	91.057	91.138	90.488	88.78	90.976	92.358	91.301	89.187	89.756
MK581204 gCoV/Ck/Pol/255/97 Poland	91.22	88.455	87.48	86.667	88.049	87.073	87.967	87.317	87.236	87.561	87.48	87.48	88.537	88.211	87.724	88.699	88.78	88.78	88.78	88.862	88.211	86.667	88.211	87.724	87.236	88.455	88.049	88.862	86.748	86.667	88.374	90.407	90.65	90.65	88.618	88.618	88.618	88.618	91.789	91.301	90.081	90.407	89.512	89.675	91.789	92.683	90.732	89.431	90.407
MT591566 CK/DE/IB80/16 Germany	93.171	87.154	86.423	85.691	86.748	85.691	86.667	86.504	87.561	86.26	87.154	87.073	88.862	87.48	87.724	87.48	87.561	87.561	87.561	87.561	87.642	85.935	88.049	87.236	86.829	87.561	87.805	87.48	87.398	85.528	86.585	97.073	97.317	97.317	86.992	86.992	86.992	86.992	90.732	90	95.935	96.829	93.089	90.569	92.764	90.732	91.22	90.325	90.894
MN987231 IBV/ck/EGY-Monuf/USC-3/13 Egypt	92.195	88.049	87.48	86.667	87.724	86.585	87.154	87.48	87.724	86.992	87.48	87.398	88.374	87.805	87.967	88.537	88.618	88.618	88.618	88.699	87.724	86.829	87.967	87.48	87.236	88.049	87.724	87.967	87.561	86.098	87.886	91.545	91.626	91.626	87.967	87.967	87.967	87.967	90.488	91.138	91.463	91.301	91.22	91.138	91.057	91.057	91.22	91.301	91.22
KR608272 LDT3-A/03 China	87.317	94.39	91.789	90.732	94.553	86.911	94.553	91.789	93.333	88.943	94.309	94.228	93.74	94.878	92.276	93.984	94.065	94.065	94.065	93.984	94.228	92.195	93.821	94.39	93.74	93.902	93.659	93.008	92.846	86.992	96.016	86.179	86.26	86.26	94.146	94.146	94.146	94.146	87.154	87.236	86.667	86.098	87.48	87.154	87.073	86.26	89.187	87.317	87.398
MK574042 ck/CH/LHB/110615/19 China	86.504	95.854	91.057	88.537	95.528	85.285	92.927	91.138	92.764	87.724	92.683	92.683	93.089	94.39	92.033	95.122	95.203	95.203	95.203	95.122	93.74	90.976	93.74	93.74	93.333	93.415	93.74	92.114	92.683	85.285	93.659	85.122	85.366	85.366	96.016	96.016	96.016	96.016	85.854	86.585	86.016	85.366	86.667	86.748	85.772	85.528	88.455	86.992	86.667
MK574043 ck/CH/LHB/110627/19 China	86.504	95.854	91.057	88.537	95.528	85.122	92.846	91.138	92.764	87.561	92.683	92.683	93.089	94.39	92.033	95.122	95.203	95.203	95.203	95.122	93.74	90.976	93.74	93.74	93.171	93.252	93.74	91.951	92.683	85.122	93.659	85.122	85.366	85.366	96.016	96.016	96.016	96.016	85.935	86.667	86.016	85.366	86.667	86.748	85.854	85.528	88.455	86.992	86.748
MN548286 D1466/84 UK	91.626	87.724	86.992	85.61	87.317	86.504	87.236	86.911	86.992	87.398	86.911	86.829	88.293	87.886	87.642	88.049	88.13	88.13	88.13	88.049	87.724	86.585	87.967	87.398	87.154	88.211	87.805	87.967	87.154	86.423	86.911	92.195	92.439	92.439	87.642	87.642	87.642	87.642	89.837	90.407	91.87	92.276	91.22	90	89.024	91.87	90.488	90.732	90.894
[truncated: 52 more columns]
