# Supplementary material for: Infectious Bronchitis Virus: A Comprehensive Multilocus Genomic Analysis to Compare DMV/1639 and QX Strains
Source: Preprints.org preprint supplement (doi:10.20944/preprints202208.0057.v1), 2022-08-02
Supplement: Supplementary file 2 [file Suppl Table S1.xlsx]

## Sheet: 1a
Table S1a. Nucleotide identities between sequences in the DMV dataset (n=37). Gene 1a.
	OM525800 DMV26/OH/20	OM525798 FLS/AZ/17	OM525799 DMV25/OH/20	OM525801 DMV28/OH/20	MW024789 IA1162/20 USA	AY514485 Cal/99 USA	FJ904713 Mass41/06 USA	FJ904716 Conn46/96 USA	FJ904717 Conn46/72 USA	FJ904718 Conn46/83 USA	KF696629 Conn vaccine/13 China	FJ904719 Conn46/91 USA	GU393333 FL18288/71 USA	GQ504720 ArkDPI/81 USA	KY776700 gCoV/ck/I0712/11 China	KY776701 gCoV/ck/I0108/17 China	KP868573 CK/CH/LJL/130908/15 China	KC506155 ck/CH/LJL/111054/13 China	KJ425485 ck/CH/LDL/110931/14 China	MH779860 Ark99 field virus/18 USA	FJ904714 Cal/95 USA	GU393331 Cal56b/91 USA	FJ904715 Cal557/03 USA	MN512434 IBV/Ck/Can/17-035614/17 Canada	MN512435 IBV/Ck/Can/17-036989/17 Canada	MN512438 IBV/Ck/Can/18-049707/18 Canada	MN512436 IBV/Can/18-048192T/18 Canada	MN512437 IBV/Ck/Can/18-04830/18 Canada	MN711790 GA/1472/04 USA	MN757859 CK/CR/1160/16 Costa Rica	GU393332 Delaware 072/92 USA	KF411040 CK/CH/LLN/111169/13 China	KU317090 SAIBK2/11 China	EU637854 CK/CH/LSD/05I/08 China	EU095850 TCoV/MG10/08 Canada	GQ427175 TCoV/IN-517/94 USA	GQ427174 TCoV/TX-GL/01 USA
OM525800 DMV26/OH/20		92.05	99.992	99.987	93.939	92.834	95.569	93.87	93.962	93.908	93.979	93.95	93.878	93.096	93.227	93.244	92.493	94.151	92.908	92.337	93.083	94.655	92.737	90.887	90.878	90.878	90.7	90.986	91.45	91.949	92.537	84.808	85.583	88.178	90.754	91.013	91.578
OM525798 FLS/AZ/17	92.05		92.059	92.046	92.505	92.147	93.226	93.256	93.332	93.277	93.332	93.302	93.222	91.308	91.165	91.182	90.895	91.614	90.105	93.045	92	92.885	91.254	90.68	90.655	90.655	90.409	90.78	93.576	93.627	89.777	85.415	86.35	88.538	92.293	93.204	92.394
OM525799 DMV25/OH/20	99.992	92.059		99.987	93.947	92.838	95.577	93.878	93.971	93.916	93.988	93.958	93.886	93.104	93.235	93.252	92.502	94.159	92.917	92.345	93.087	94.664	92.745	90.891	90.882	90.882	90.704	90.99	91.458	91.949	92.546	84.808	85.592	88.186	90.762	91.021	91.587
OM525801 DMV28/OH/20	99.987	92.046	99.987		93.934	92.834	95.565	93.865	93.958	93.903	93.975	93.946	93.882	93.091	93.223	93.24	92.489	94.147	92.904	92.333	93.083	94.659	92.732	90.887	90.878	90.878	90.7	90.986	91.445	91.953	92.533	84.799	85.583	88.178	90.75	91.008	91.574
MW024789 IA1162/20 USA	93.939	92.505	93.947	93.934		93.724	94.356	92.91	93.003	92.948	93.02	92.99	92.944	94.369	94.352	94.369	93.627	95.263	93.982	92.278	94.537	94.697	94.533	91.547	91.505	91.505	91.336	91.631	91.477	91.974	93.611	85.019	85.988	88.234	90.931	91.13	92.293
AY514485 Cal/99 USA	92.834	92.147	92.838	92.834	93.724		94.343	92.99	93.058	93.003	93.075	93.045	92.99	94.213	94.221	94.238	93.311	95.099	93.439	92.147	95.553	95.713	93.821	90.903	90.844	90.844	90.632	90.978	91.127	92.147	93.11	85.023	86.042	88.803	90.842	91.118	92.592
FJ904713 Mass41/06 USA	95.569	93.226	95.577	95.565	94.356	94.343		96.598	96.69	96.644	96.707	96.678	96.581	93.842	93.707	93.741	93.083	94.871	93.228	94.482	94.373	96.969	94.015	91.728	91.702	91.702	91.483	91.82	92.786	93.243	92.941	85.174	86.152	89.191	91.902	92.144	92.415
FJ904716 Conn46/96 USA	93.87	93.256	93.878	93.865	92.91	92.99	96.598		99.848	99.827	99.848	99.836	99.646	92.042	91.578	91.578	91.039	92.12	90.476	96.451	92.109	95.81	92.088	92.051	92.026	92.026	91.833	92.179	93.069	93.315	90.156	85.381	86.047	89.507	92.268	92.687	91.671
FJ904717 Conn46/72 USA	93.962	93.332	93.971	93.958	93.003	93.058	96.69	99.848		99.945	99.949	99.937	99.747	92.101	91.62	91.637	91.098	92.179	90.535	96.518	92.177	95.869	92.156	92.152	92.127	92.127	91.934	92.28	93.136	93.399	90.215	85.423	86.105	89.583	92.369	92.779	91.738
FJ904718 Conn46/83 USA	93.908	93.277	93.916	93.903	92.948	93.003	96.644	99.827	99.945		99.895	99.882	99.692	92.046	91.566	91.582	91.043	92.124	90.48	96.463	92.122	95.814	92.101	92.098	92.073	92.073	91.879	92.225	93.081	93.344	90.16	85.393	86.076	89.536	92.314	92.724	91.683
KF696629 Conn vaccine/13 China	93.979	93.332	93.988	93.975	93.02	93.075	96.707	99.848	99.949	99.895		99.954	99.764	92.118	91.637	91.654	91.114	92.196	90.552	96.535	92.194	95.886	92.172	92.169	92.144	92.144	91.951	92.297	93.153	93.399	90.232	85.44	86.105	89.6	92.386	92.796	91.755
FJ904719 Conn46/91 USA	93.95	93.302	93.958	93.946	92.99	93.045	96.678	99.836	99.937	99.882	99.954		99.734	92.088	91.616	91.633	91.093	92.166	90.523	96.506	92.164	95.857	92.143	92.14	92.115	92.115	91.922	92.267	93.123	93.386	90.202	85.41	86.076	89.57	92.373	92.783	91.726
GU393333 FL18288/71 USA	93.878	93.222	93.886	93.882	92.944	92.99	96.581	99.646	99.747	99.692	99.764	99.734		92.017	91.553	91.57	91.013	92.12	90.485	96.434	92.118	95.785	92.105	92.094	92.068	92.068	91.875	92.221	93.077	93.365	90.164	85.406	86.08	89.499	92.268	92.729	91.646
GQ504720 ArkDPI/81 USA	93.096	91.308	93.104	93.091	94.369	94.213	93.842	92.042	92.101	92.046	92.118	92.088	92.017		98.986	99.019	98.436	96.047	97.211	92.092	95.557	94.723	97.045	91.379	91.311	91.311	91.306	91.454	91.216	91.469	96.881	85.271	86.156	87.425	90.819	90.834	92.796
KY776700 gCoV/ck/I0712/11 China	93.227	91.165	93.235	93.223	94.352	94.221	93.707	91.578	91.62	91.566	91.637	91.616	91.553	98.986		99.966	98.923	96.19	97.865	91.173	95.709	94.841	97.222	91	90.933	90.933	90.935	91.083	91.182	91.325	97.459	84.985	85.945	87.467	90.524	90.607	92.864
KY776701 gCoV/ck/I0108/17 China	93.244	91.182	93.252	93.24	94.369	94.238	93.741	91.578	91.637	91.582	91.654	91.633	91.57	99.019	99.966		98.957	96.224	97.899	91.19	95.743	94.874	97.239	91.017	90.95	90.95	90.952	91.1	91.199	91.342	97.493	85.002	85.962	87.467	90.541	90.623	92.881
KP868573 CK/CH/LJL/130908/15 China	92.493	90.895	92.502	92.489	93.627	93.311	93.083	91.039	91.098	91.043	91.114	91.093	91.013	98.436	98.923	98.957		95.289	96.958	90.752	94.849	94.015	96.317	91.698	91.631	91.631	91.635	91.783	90.853	90.6	96.553	84.943	85.929	87.147	90.087	90.4	92.3
KC506155 ck/CH/LJL/111054/13 China	94.151	91.614	94.159	94.147	95.263	95.099	94.871	92.12	92.179	92.124	92.196	92.166	92.12	96.047	96.19	96.224	95.289		98.239	91.631	96.308	95.331	95.756	92.985	92.909	92.909	92.71	93.072	90.948	91.766	97.826	85.128	86.181	88.571	90.554	90.847	92.674
KJ425485 ck/CH/LDL/110931/14 China	92.908	90.105	92.917	92.904	93.982	93.439	93.228	90.476	90.535	90.48	90.552	90.523	90.485	97.211	97.865	97.899	96.958	98.239		90.072	95.171	93.704	96.699	91.673	91.606	91.606	91.61	91.757	89.903	90.358	99.441	84.816	85.844	87.266	89.635	89.701	91.864
MH779860 Ark99 field virus/18 USA	92.337	93.045	92.345	92.333	92.278	92.147	94.482	96.451	96.518	96.463	96.535	96.506	96.434	92.092	91.173	91.19	90.752	91.631	90.072		91.612	94.166	91.49	91.379	91.303	91.303	91.184	91.504	92.978	93.382	89.768	85.524	85.996	89.069	92.302	92.737	91.62
FJ904714 Cal/95 USA	93.083	92	93.087	93.083	94.537	95.553	94.373	92.109	92.177	92.122	92.194	92.164	92.118	95.557	95.709	95.743	94.849	96.308	95.171	91.612		95.203	95.62	91.715	91.656	91.656	91.479	91.833	91.283	92.185	94.834	85.49	86.367	88.47	90.905	91.046	92.899
GU393331 Cal56b/91 USA	94.655	92.885	94.664	94.659	94.697	95.713	96.969	95.81	95.869	95.814	95.886	95.857	95.785	94.723	94.841	94.874	94.015	95.331	93.704	94.166	95.203		94.516	92.06	92.018	92.018	91.816	92.153	92.092	92.792	93.375	85.019	85.937	89.119	91.62	91.921	93.53
FJ904715 Cal557/03 USA	92.737	91.254	92.745	92.732	94.533	93.821	94.015	92.088	92.156	92.101	92.172	92.143	92.105	97.045	97.222	97.239	96.317	95.756	96.699	91.49	95.62	94.516		91.105	91.038	91.038	91.074	91.205	90.891	91.498	96.352	85.04	85.933	87.401	90.537	90.644	92.27
MN512434 IBV/Ck/Can/17-035614/17 Canada	90.887	90.68	90.891	90.887	91.547	90.903	91.728	92.051	92.152	92.098	92.169	92.14	92.094	91.379	91	91.017	91.698	92.985	91.673	91.379	91.715	92.06	91.105		99.84	99.84	99.243	99.605	89.898	90.773	91.311	84.897	85.579	88.056	90.066	90.687	90.453
MN512435 IBV/Ck/Can/17-036989/17 Canada	90.878	90.655	90.882	90.878	91.505	90.844	91.702	92.026	92.127	92.073	92.144	92.115	92.068	91.311	90.933	90.95	91.631	92.909	91.606	91.303	91.656	92.018	91.038	99.84		100	99.117	99.479	89.839	90.748	91.244	84.881	85.511	88.014	90.041	90.637	90.386
MN512438 IBV/Ck/Can/18-049707/18 Canada	90.878	90.655	90.882	90.878	91.505	90.844	91.702	92.026	92.127	92.073	92.144	92.115	92.068	91.311	90.933	90.95	91.631	92.909	91.606	91.303	91.656	92.018	91.038	99.84	100		99.117	99.479	89.839	90.748	91.244	84.881	85.511	88.014	90.041	90.637	90.386
MN512436 IBV/Can/18-048192T/18 Canada	90.7	90.409	90.704	90.7	91.336	90.632	91.483	91.833	91.934	91.879	91.951	91.922	91.875	91.306	90.935	90.952	91.635	92.71	91.61	91.184	91.479	91.816	91.074	99.243	99.117	99.117		99.536	89.797	90.599	91.247	84.783	85.415	87.861	89.486	90.077	89.89
MN512437 IBV/Ck/Can/18-04830/18 Canada	90.986	90.78	90.99	90.986	91.631	90.978	91.82	92.179	92.28	92.225	92.297	92.267	92.221	91.454	91.083	91.1	91.783	93.072	91.757	91.504	91.833	92.153	91.205	99.605	99.479	99.479	99.536		89.979	90.847	91.395	84.985	85.634	88.15	89.764	90.38	90.159
MN711790 GA/1472/04 USA	91.45	93.576	91.458	91.445	91.477	91.127	92.786	93.069	93.136	93.081	93.153	93.123	93.077	91.216	91.182	91.199	90.853	90.948	89.903	92.978	91.283	92.092	90.891	89.898	89.839	89.839	89.797	89.979		93.531	89.574	85.372	86.409	87.904	92.655	93.364	92.42
MN757859 CK/CR/1160/16 Costa Rica	91.949	93.627	91.949	91.953	91.974	92.147	93.243	93.315	93.399	93.344	93.399	93.386	93.365	91.469	91.325	91.342	90.6	91.766	90.358	93.382	92.185	92.792	91.498	90.773	90.748	90.748	90.599	90.847	93.531		90.013	85.313	86.063	88.678	93.177	93.973	92.024
GU393332 Delaware 072/92 USA	92.537	89.777	92.546	92.533	93.611	93.11	92.941	90.156	90.215	90.16	90.232	90.202	90.164	96.881	97.459	97.493	96.553	97.826	99.441	89.768	94.834	93.375	96.352	91.311	91.244	91.244	91.247	91.395	89.574	90.013		84.538	85.524	87.191	89.273	89.356	91.486
KF411040 CK/CH/LLN/111169/13 China	84.808	85.415	84.808	84.799	85.019	85.023	85.174	85.381	85.423	85.393	85.44	85.41	85.406	85.271	84.985	85.002	84.943	85.128	84.816	85.524	85.49	85.019	85.04	84.897	84.881	84.881	84.783	84.985	85.372	85.313	84.538		93.955	84.538	85.008	85.31	84.923
KU317090 SAIBK2/11 China	85.583	86.35	85.592	85.583	85.988	86.042	86.152	86.047	86.105	86.076	86.105	86.076	86.08	86.156	85.945	85.962	85.929	86.181	85.844	85.996	86.367	85.937	85.933	85.579	85.511	85.511	85.415	85.634	86.409	86.063	85.524	93.955		85.259	85.832	86.176	85.958
EU637854 CK/CH/LSD/05I/08 China	88.178	88.538	88.186	88.178	88.234	88.803	89.191	89.507	89.583	89.536	89.6	89.57	89.499	87.425	87.467	87.467	87.147	88.571	87.266	89.069	88.47	89.119	87.401	88.056	88.014	88.014	87.861	88.15	87.904	88.678	87.191	84.538	85.259		87.602	88.072	87.56
EU095850 TCoV/MG10/08 Canada	90.754	92.293	90.762	90.75	90.931	90.842	91.902	92.268	92.369	92.314	92.386	92.373	92.268	90.819	90.524	90.541	90.087	90.554	89.635	92.302	90.905	91.62	90.537	90.066	90.041	90.041	89.486	89.764	92.655	93.177	89.273	85.008	85.832	87.602		94.724	94.9
GQ427175 TCoV/IN-517/94 USA	91.013	93.204	91.021	91.008	91.13	91.118	92.144	92.687	92.779	92.724	92.796	92.783	92.729	90.834	90.607	90.623	90.4	90.847	89.701	92.737	91.046	91.921	90.644	90.687	90.637	90.637	90.077	90.38	93.364	93.973	89.356	85.31	86.176	88.072	94.724		93.344
GQ427174 TCoV/TX-GL/01 USA	91.578	92.394	91.587	91.574	92.293	92.592	92.415	91.671	91.738	91.683	91.755	91.726	91.646	92.796	92.864	92.881	92.3	92.674	91.864	91.62	92.899	93.53	92.27	90.453	90.386	90.386	89.89	90.159	92.42	92.024	91.486	84.923	85.958	87.56	94.9	93.344

## Sheet: 1ab
Table S1b. Nucleotide identities between sequences in the DMV dataset (n=37). Gene 1ab.
	OM525800 DMV26/OH/20	OM525798 FLS/AZ/17	OM525799 DMV25/OH/20	OM525801 DMV28/OH/20	MW024789 IA1162/20 USA	AY514485 Cal/99 USA	FJ904713 Mass41/06 USA	FJ904716 Conn46/96 USA	FJ904717 Conn46/72 USA	FJ904718 Conn46/83 USA	KF696629 Conn vaccine/13 China	FJ904719 Conn46/91 USA	GU393333 FL18288/71 USA	GQ504720 ArkDPI/81 USA	KY776700 gCoV/ck/I0712/11 China	KY776701 gCoV/ck/I0108/17 China	KP868573 CK/CH/LJL/130908/15 China	KC506155 ck/CH/LJL/111054/13 China	KJ425485 ck/CH/LDL/110931/14 China	MH779860 Ark99 field virus/18 USA	FJ904714 Cal/95 USA	GU393331 Cal56b/91 USA	FJ904715 Cal557/03 USA	MN512434 IBV/Ck/Can/17-035614/17 Canada	MN512435 IBV/Ck/Can/17-036989/17 Canada	MN512438 IBV/Ck/Can/18-049707/18 Canada	MN512436 IBV/Can/18-048192T/18 Canada	MN512437 IBV/Ck/Can/18-04830/18 Canada	MN711790 GA/1472/04 USA	MN757859 CK/CR/1160/16 Costa Rica	GU393332 Delaware 072/92 USA	KF411040 CK/CH/LLN/111169/13 China	KU317090 SAIBK2/11 China	EU637854 CK/CH/LSD/05I/08 China	EU095850 TCoV/MG10/08 Canada	GQ427175 TCoV/IN-517/94 USA	GQ427174 TCoV/TX-GL/01 USA
OM525800 DMV26/OH/20		93.994	99.99	99.987	95.17	94.748	95.689	95.456	95.546	95.519	95.561	95.513	95.436	94.582	94.781	94.806	94.319	95.693	93.43	94.059	94.318	95.773	94.182	93.683	93.673	93.668	93.555	93.716	93.55	93.3	93.135	87.896	86.961	89.107	92.655	92.689	93.544
OM525798 FLS/AZ/17	93.994		94.004	93.996	94.436	94.383	94.308	95.155	95.235	95.208	95.24	95.193	95.105	93.521	93.406	93.431	93.265	94.04	91.628	94.542	93.727	94.828	93.484	93.58	93.545	93.54	93.392	93.603	94.798	94.255	91.313	88.197	87.348	89.407	93.7	94.038	94.145
OM525799 DMV25/OH/20	99.99	94.004		99.992	95.17	94.755	95.699	95.466	95.556	95.529	95.571	95.524	95.446	94.592	94.791	94.816	94.329	95.703	93.44	94.069	94.325	95.783	94.192	93.691	93.681	93.676	93.562	93.723	93.561	93.295	93.145	87.891	86.961	89.117	92.665	92.699	93.554
OM525801 DMV28/OH/20	99.987	93.996	99.992		95.162	94.753	95.692	95.458	95.549	95.521	95.564	95.516	95.443	94.584	94.784	94.809	94.321	95.696	93.432	94.062	94.323	95.781	94.184	93.688	93.678	93.673	93.56	93.721	93.553	93.298	93.138	87.886	86.956	89.112	92.658	92.692	93.546
MW024789 IA1162/20 USA	95.17	94.436	95.17	95.162		95.404	94.891	95.029	95.12	95.092	95.135	95.087	95.019	95.466	95.497	95.522	94.964	96.281	93.879	94.014	95.255	95.939	95.419	94.147	94.112	94.107	94.005	94.171	93.632	93.305	93.539	88.102	87.082	89.16	92.923	92.861	94.093
AY514485 Cal/99 USA	94.748	94.383	94.755	94.753	95.404		95.079	95.509	95.585	95.557	95.6	95.552	95.434	95.685	95.715	95.74	95.067	96.676	93.706	94.112	96.112	96.982	95.301	94.19	94.135	94.13	94.002	94.198	93.685	93.529	93.396	88.365	87.16	89.545	92.996	92.959	94.466
FJ904713 Mass41/06 USA	95.689	94.308	95.699	95.692	94.891	95.079		96.594	96.675	96.642	96.68	96.642	96.539	94.524	94.298	94.333	94.288	95.364	94.907	95.092	94.76	96.665	94.667	93.658	93.633	93.628	93.495	93.676	93.749	93.8	94.154	87.647	87.29	89.726	93.198	93.065	93.825
FJ904716 Conn46/96 USA	95.456	95.155	95.466	95.458	95.029	95.509	96.594		99.864	99.847	99.859	99.832	99.623	94.516	94.225	94.24	93.783	95.03	91.995	96.849	94.119	97.231	94.373	95.051	95.026	95.021	94.894	95.09	94.953	94.3	91.685	88.68	87.202	89.999	93.896	93.96	94.06
FJ904717 Conn46/72 USA	95.546	95.235	95.556	95.549	95.12	95.585	96.675	99.864		99.952	99.955	99.927	99.718	94.587	94.285	94.31	93.853	95.1	92.06	96.924	94.185	97.301	94.439	95.146	95.121	95.116	94.99	95.186	95.028	94.386	91.75	88.73	87.263	90.08	93.992	94.046	94.125
FJ904718 Conn46/83 USA	95.519	95.208	95.529	95.521	95.092	95.557	96.642	99.847	99.952		99.927	99.889	99.691	94.559	94.258	94.283	93.825	95.073	92.042	96.896	94.157	97.273	94.411	95.119	95.094	95.089	94.962	95.158	95.001	94.358	91.733	88.717	87.25	90.057	93.964	94.018	94.098
KF696629 Conn vaccine/13 China	95.561	95.24	95.571	95.564	95.135	95.6	96.68	99.859	99.955	99.927		99.932	99.734	94.602	94.3	94.325	93.868	95.115	92.075	96.939	94.2	97.316	94.454	95.161	95.136	95.131	95.005	95.201	95.043	94.391	91.765	88.745	87.268	90.095	94.007	94.061	94.14
FJ904719 Conn46/91 USA	95.513	95.193	95.524	95.516	95.087	95.552	96.642	99.832	99.927	99.889	99.932		99.686	94.554	94.258	94.283	93.825	95.068	92.027	96.891	94.152	97.268	94.406	95.114	95.089	95.084	94.957	95.153	94.996	94.353	91.718	88.697	87.22	90.052	93.969	94.023	94.092
GU393333 FL18288/71 USA	95.436	95.105	95.446	95.443	95.019	95.434	96.539	99.623	99.718	99.691	99.734	99.686		94.436	94.145	94.17	93.702	94.965	91.99	96.798	94.074	97.15	94.318	95.011	94.986	94.981	94.854	95.05	94.908	94.325	91.685	88.634	87.197	89.979	93.886	93.985	93.989
GQ504720 ArkDPI/81 USA	94.582	93.521	94.592	94.584	95.466	95.685	94.524	94.516	94.587	94.559	94.602	94.554	94.436		98.837	98.872	98.258	96.809	95.721	94.592	95.989	96.15	97.057	94.122	94.062	94.057	94.043	94.12	94.004	92.918	95.476	88.147	87.328	88.834	92.908	92.709	94.483
KY776700 gCoV/ck/I0712/11 China	94.781	93.406	94.791	94.784	95.497	95.715	94.298	94.225	94.285	94.258	94.3	94.258	94.145	98.837		99.965	98.946	97.09	96.325	93.506	96.125	96.195	97.163	93.801	93.741	93.736	93.726	93.804	94.185	92.953	96.105	88.147	87.132	88.825	92.56	92.654	94.297
KY776701 gCoV/ck/I0108/17 China	94.806	93.431	94.816	94.809	95.522	95.74	94.333	94.24	94.31	94.283	94.325	94.283	94.17	98.872	99.965		98.981	97.125	96.36	93.531	96.16	96.23	97.188	93.826	93.766	93.761	93.752	93.829	94.21	92.978	96.14	88.172	87.157	88.83	92.585	92.679	94.322
KP868573 CK/CH/LJL/130908/15 China	94.319	93.265	94.329	94.321	94.964	95.067	94.288	93.783	93.853	93.825	93.868	93.825	93.702	98.258	98.946	98.981		96.432	96.149	93.129	95.331	95.411	96.322	94.183	94.122	94.117	94.108	94.186	93.818	92.531	95.49	88.011	87.097	88.523	92.211	92.43	93.923
KC506155 ck/CH/LJL/111054/13 China	95.693	94.04	95.703	95.696	96.281	96.676	95.364	95.03	95.1	95.073	95.115	95.068	94.965	96.809	97.09	97.125	96.432		96.879	93.854	96.603	96.764	96.545	95.427	95.372	95.367	95.236	95.442	93.688	93.361	96.513	88.549	87.308	89.422	92.803	92.922	94.484
KJ425485 ck/CH/LDL/110931/14 China	93.43	91.628	93.44	93.432	93.879	93.706	94.907	91.995	92.06	92.042	92.075	92.027	91.99	95.721	96.325	96.36	96.149	96.879		91.598	94.492	93.794	95.542	92.702	92.662	92.657	92.656	92.733	91.487	91.864	99.063	87.469	87.122	88.448	91.3	91.344	92.643
MH779860 Ark99 field virus/18 USA	94.059	94.542	94.069	94.062	94.014	94.112	95.092	96.849	96.924	96.896	96.939	96.891	96.798	94.592	93.506	93.531	93.129	93.854	91.598		93.572	95.532	93.715	93.861	93.816	93.811	93.728	93.899	94.582	93.883	91.364	87.971	87.278	89.708	93.856	93.809	93.781
FJ904714 Cal/95 USA	94.318	93.727	94.325	94.323	95.255	96.112	94.76	94.119	94.185	94.157	94.2	94.152	94.074	95.989	96.125	96.16	95.331	96.603	94.492	93.572		96.075	95.916	93.801	93.761	93.756	93.633	93.834	93.355	93.295	94.288	88.257	87.403	89.311	92.837	92.815	94.357
GU393331 Cal56b/91 USA	95.773	94.828	95.783	95.781	95.939	96.982	96.665	97.231	97.301	97.273	97.316	97.268	97.15	96.15	96.195	96.23	95.411	96.764	93.794	95.532	96.075		95.856	94.915	94.89	94.885	94.743	94.944	94.446	93.868	93.594	88.313	87.207	89.869	93.483	93.481	95.104
FJ904715 Cal557/03 USA	94.182	93.484	94.192	94.184	95.419	95.301	94.667	94.373	94.439	94.411	94.454	94.406	94.318	97.057	97.163	97.188	96.322	96.545	95.542	93.715	95.916	95.856		93.698	93.638	93.633	93.669	93.726	93.247	92.775	95.337	87.853	87.099	88.633	92.476	92.253	93.849
MN512434 IBV/Ck/Can/17-035614/17 Canada	93.683	93.58	93.691	93.688	94.147	94.19	93.658	95.051	95.146	95.119	95.161	95.114	95.011	94.122	93.801	93.826	94.183	95.427	92.702	93.861	93.801	94.915	93.698		99.844	99.839	99.488	99.694	93.073	92.812	92.403	88.272	86.972	89.158	92.353	92.51	93.08
MN512435 IBV/Ck/Can/17-036989/17 Canada	93.673	93.545	93.681	93.678	94.112	94.135	93.633	95.026	95.121	95.094	95.136	95.089	94.986	94.062	93.741	93.766	94.122	95.372	92.662	93.816	93.761	94.89	93.638	99.844		99.995	99.383	99.598	93.038	92.797	92.363	88.262	86.922	89.113	92.318	92.47	93.02
MN512438 IBV/Ck/Can/18-049707/18 Canada	93.668	93.54	93.676	93.673	94.107	94.13	93.628	95.021	95.116	95.089	95.131	95.084	94.981	94.057	93.736	93.761	94.117	95.367	92.657	93.811	93.756	94.885	93.633	99.839	99.995		99.378	99.593	93.033	92.792	92.357	88.257	86.922	89.113	92.313	92.465	93.015
MN512436 IBV/Can/18-048192T/18 Canada	93.555	93.392	93.562	93.56	94.005	94.002	93.495	94.894	94.99	94.962	95.005	94.957	94.854	94.043	93.726	93.752	94.108	95.236	92.656	93.728	93.633	94.743	93.669	99.488	99.383	99.378		99.683	92.987	92.681	92.356	88.187	86.856	89.039	92.192	92.325	92.926
MN512437 IBV/Ck/Can/18-04830/18 Canada	93.716	93.603	93.723	93.721	94.171	94.198	93.676	95.09	95.186	95.158	95.201	95.153	95.05	94.12	93.804	93.829	94.186	95.442	92.733	93.899	93.834	94.944	93.726	99.694	99.598	99.593	99.683		93.095	92.839	92.434	88.308	86.986	89.2	92.354	92.532	93.082
MN711790 GA/1472/04 USA	93.55	94.798	93.561	93.553	93.632	93.685	93.749	94.953	95.028	95.001	95.043	94.996	94.908	94.004	94.185	94.21	93.818	93.688	91.487	94.582	93.355	94.446	93.247	93.073	93.038	93.033	92.987	93.095		94.289	91.303	88.262	87.459	89.154	93.866	94.296	94.045
MN757859 CK/CR/1160/16 Costa Rica	93.3	94.255	93.295	93.298	93.305	93.529	93.8	94.3	94.386	94.358	94.391	94.353	94.325	92.918	92.953	92.978	92.531	93.361	91.864	93.883	93.295	93.868	92.775	92.812	92.797	92.792	92.681	92.839	94.289		91.559	88.197	87.413	89.46	94.138	94.586	93.414
GU393332 Delaware 072/92 USA	93.135	91.313	93.145	93.138	93.539	93.396	94.154	91.685	91.75	91.733	91.765	91.718	91.685	95.476	96.105	96.14	95.49	96.513	99.063	91.364	94.288	93.594	95.337	92.403	92.363	92.357	92.356	92.434	91.303	91.559		87.211	86.758	88.246	90.954	91.008	92.292
KF411040 CK/CH/LLN/111169/13 China	87.896	88.197	87.891	87.886	88.102	88.365	87.647	88.68	88.73	88.717	88.745	88.697	88.634	88.147	88.147	88.172	88.011	88.549	87.469	87.971	88.257	88.313	87.853	88.272	88.262	88.257	88.187	88.308	88.262	88.197	87.211		93.888	86.509	87.847	88.151	87.854
KU317090 SAIBK2/11 China	86.961	87.348	86.961	86.956	87.082	87.16	87.29	87.202	87.263	87.25	87.268	87.22	87.197	87.328	87.132	87.157	87.097	87.308	87.122	87.278	87.403	87.207	87.099	86.972	86.922	86.922	86.856	86.986	87.459	87.413	86.758	93.888		87.065	87.211	87.496	87.34
EU637854 CK/CH/LSD/05I/08 China	89.107	89.407	89.117	89.112	89.16	89.545	89.726	89.999	90.08	90.057	90.095	90.052	89.979	88.834	88.825	88.83	88.523	89.422	88.448	89.708	89.311	89.869	88.633	89.158	89.113	89.113	89.039	89.2	89.154	89.46	88.246	86.509	87.065		88.904	89.216	88.972
EU095850 TCoV/MG10/08 Canada	92.655	93.7	92.665	92.658	92.923	92.996	93.198	93.896	93.992	93.964	94.007	93.969	93.886	92.908	92.56	92.585	92.211	92.803	91.3	93.856	92.837	93.483	92.476	92.353	92.318	92.313	92.192	92.354	93.866	94.138	90.954	87.847	87.211	88.904		95.509	95.724
GQ427175 TCoV/IN-517/94 USA	92.689	94.038	92.699	92.692	92.861	92.959	93.065	93.96	94.046	94.018	94.061	94.023	93.985	92.709	92.654	92.679	92.43	92.922	91.344	93.809	92.815	93.481	92.253	92.51	92.47	92.465	92.325	92.532	94.296	94.586	91.008	88.151	87.496	89.216	95.509		94.145
GQ427174 TCoV/TX-GL/01 USA	93.544	94.145	93.554	93.546	94.093	94.466	93.825	94.06	94.125	94.098	94.14	94.092	93.989	94.483	94.297	94.322	93.923	94.484	92.643	93.781	94.357	95.104	93.849	93.08	93.02	93.015	92.926	93.082	94.045	93.414	92.292	87.854	87.34	88.972	95.724	94.145

## Sheet: Spike
Table S1c. Nucleotide identities between sequences in the DMV dataset (n=37). Spike gene.
	OM525800 DMV26/OH/20	OM525798 FLS/AZ/17	OM525799 DMV25/OH/20	OM525801 DMV28/OH/20	MW024789 IA1162/20 USA	AY514485 Cal/99 USA	FJ904713 Mass41/06 USA	FJ904716 Conn46/96 USA	FJ904717 Conn46/72 USA	FJ904718 Conn46/83 USA	KF696629 Conn vaccine/13 China	FJ904719 Conn46/91 USA	GU393333 FL18288/71 USA	GQ504720 ArkDPI/81 USA	KY776700 gCoV/ck/I0712/11 China	KY776701 gCoV/ck/I0108/17 China	KP868573 CK/CH/LJL/130908/15 China	KC506155 ck/CH/LJL/111054/13 China	KJ425485 ck/CH/LDL/110931/14 China	MH779860 Ark99 field virus/18 USA	FJ904714 Cal/95 USA	GU393331 Cal56b/91 USA	FJ904715 Cal557/03 USA	MN512434 IBV/Ck/Can/17-035614/17 Canada	MN512435 IBV/Ck/Can/17-036989/17 Canada	MN512438 IBV/Ck/Can/18-049707/18 Canada	MN512436 IBV/Can/18-048192T/18 Canada	MN512437 IBV/Ck/Can/18-04830/18 Canada	MN711790 GA/1472/04 USA	MN757859 CK/CR/1160/16 Costa Rica	GU393332 Delaware 072/92 USA	KF411040 CK/CH/LLN/111169/13 China	KU317090 SAIBK2/11 China	EU637854 CK/CH/LSD/05I/08 China	EU095850 TCoV/MG10/08 Canada	GQ427175 TCoV/IN-517/94 USA	GQ427174 TCoV/TX-GL/01 USA
OM525800 DMV26/OH/20		89.526	100	100	88.499	84.742	82.18	82.241	82.227	82.256	82.284	82.142	81.961	84.202	84.059	83.945	81.753	82.398	82.38	85.482	88.527	88.299	85.106	94.944	94.916	94.944	94.944	94.916	86.023	91.09	66.845	82.341	79.892	80.871	46.464	46.503	46.17
OM525798 FLS/AZ/17	89.526		89.526	89.526	86.929	87.731	84.6	84.708	84.664	84.692	84.721	84.55	84.598	85.881	85.966	85.853	84.344	84.758	84.714	86.934	90.725	90.268	86.128	87.671	87.7	87.728	87.757	87.728	87.02	86.934	66.657	84.749	79.152	80.273	46.259	46.529	46.324
OM525799 DMV25/OH/20	100	89.526		100	88.499	84.742	82.18	82.241	82.227	82.256	82.284	82.142	81.961	84.202	84.059	83.945	81.753	82.398	82.38	85.482	88.527	88.299	85.106	94.944	94.916	94.944	94.944	94.916	86.023	91.09	66.845	82.341	79.892	80.871	46.464	46.503	46.17
OM525801 DMV28/OH/20	100	89.526	100		88.499	84.742	82.18	82.241	82.227	82.256	82.284	82.142	81.961	84.202	84.059	83.945	81.753	82.398	82.38	85.482	88.527	88.299	85.106	94.944	94.916	94.944	94.944	94.916	86.023	91.09	66.845	82.341	79.892	80.871	46.464	46.503	46.17
MW024789 IA1162/20 USA	88.499	86.929	88.499	88.499		85.014	82.336	82.34	82.355	82.383	82.412	82.212	82.145	84.33	84.387	84.274	82.051	82.45	82.45	85.755	85.674	85.131	83.39	90.497	90.497	90.525	90.582	90.582	84.53	88.158	66.648	82.383	79.533	82.821	46.439	46.374	46.247
AY514485 Cal/99 USA	84.742	87.731	84.742	84.742	85.014		87.037	86.752	86.923	86.952	86.98	86.781	86.496	90.655	90.912	90.798	86.268	87.123	87.265	89.174	86.536	85.653	84.81	83.604	83.575	83.604	83.718	83.661	85.356	83.974	67.099	87.037	80.928	81.88	46.799	46.734	46.607
FJ904713 Mass41/06 USA	82.18	84.6	82.18	82.18	82.336	87.037		97.42	97.478	97.506	97.535	97.277	96.933	87.749	88.177	88.063	96.819	97.506	99.255	86.068	84.429	83.632	84.554	81.867	81.839	81.867	81.867	81.867	85.271	83.362	68.376	97.28	81.904	84.578	45.754	45.973	46.077
FJ904716 Conn46/96 USA	82.241	84.708	82.241	82.241	82.34	86.752	97.42		99.598	99.626	99.655	99.397	98.822	87.55	87.977	87.863	94.612	99.283	97.478	85.783	84.55	83.808	84.128	81.842	81.813	81.842	81.842	81.842	85.014	83.191	68.248	99.397	81.504	84.149	45.625	45.767	45.742
FJ904717 Conn46/72 USA	82.227	84.664	82.227	82.227	82.355	86.923	97.478	99.598		99.971	99.943	99.684	99.052	87.55	87.977	87.863	94.583	99.512	97.707	85.84	84.534	83.737	84.214	81.914	81.886	81.914	81.914	81.914	85.185	83.191	68.446	99.627	81.532	84.32	45.805	45.947	45.922
FJ904718 Conn46/83 USA	82.256	84.692	82.256	82.256	82.383	86.952	97.506	99.626	99.971		99.971	99.655	99.08	87.578	88.006	87.892	94.612	99.541	97.736	85.869	84.563	83.765	84.242	81.942	81.914	81.942	81.942	81.942	85.214	83.219	68.475	99.656	81.561	84.349	45.78	45.921	45.897
KF696629 Conn vaccine/13 China	82.284	84.721	82.284	82.284	82.412	86.98	97.535	99.655	99.943	99.971		99.684	99.109	87.607	88.034	87.92	94.64	99.57	97.764	85.897	84.591	83.794	84.27	81.971	81.942	81.971	81.971	81.971	85.242	83.248	68.503	99.684	81.589	84.378	45.805	45.947	45.922
FJ904719 Conn46/91 USA	82.142	84.55	82.142	82.142	82.212	86.781	97.277	99.397	99.684	99.655	99.684		98.879	87.379	87.806	87.692	94.411	99.312	97.506	85.67	84.363	83.566	84.043	81.772	81.743	81.772	81.772	81.772	85.014	83.048	68.39	99.426	81.389	84.206	45.805	45.947	45.922
GU393333 FL18288/71 USA	81.961	84.598	81.961	81.961	82.145	86.496	96.933	98.822	99.052	99.08	99.109	98.879		87.293	87.664	87.55	94.038	98.966	97.163	85.527	84.383	83.585	83.844	81.704	81.704	81.733	81.704	81.704	84.786	82.877	68.324	98.852	81.246	83.948	45.471	45.638	45.639
GQ504720 ArkDPI/81 USA	84.202	85.881	84.202	84.202	84.33	90.655	87.749	87.55	87.55	87.578	87.607	87.379	87.293		99.345	99.231	87.664	87.692	88.006	96.068	86.308	85.169	84.725	83.348	83.234	83.262	83.433	83.404	85.783	83.404	67.551	87.521	81.697	82.194	46.413	46.477	46.272
KY776700 gCoV/ck/I0712/11 China	84.059	85.966	84.059	84.059	84.387	90.912	88.177	87.977	87.977	88.006	88.034	87.806	87.664	99.345		99.886	88.12	88.12	88.433	95.726	86.166	85.198	84.867	83.319	83.205	83.234	83.404	83.376	85.783	83.376	67.579	87.949	81.839	82.479	46.619	46.683	46.427
KY776701 gCoV/ck/I0108/17 China	83.945	85.853	83.945	83.945	84.274	90.798	88.063	87.863	87.863	87.892	87.92	87.692	87.55	99.231	99.886		88.006	88.006	88.319	95.78	86.052	85.084	84.753	83.205	83.091	83.12	83.291	83.262	85.67	83.262	67.466	87.835	81.725	82.365	46.567	46.632	46.375
KP868573 CK/CH/LJL/130908/15 China	81.753	84.344	81.753	81.753	82.051	86.268	96.819	94.612	94.583	94.612	94.64	94.411	94.038	87.664	88.12	88.006		94.612	96.79	85.556	84.486	83.746	84.412	81.469	81.44	81.469	81.469	81.469	84.729	83.134	67.668	94.389	81.732	84.263	46.166	46.384	46.437
KC506155 ck/CH/LJL/111054/13 China	82.398	84.758	82.398	82.398	82.45	87.123	97.506	99.283	99.512	99.541	99.57	99.312	98.966	87.692	88.12	88.006	94.612		97.736	86.011	84.572	83.775	84.384	82.085	82.056	82.085	82.085	82.085	85.242	83.419	68.443	99.37	81.532	84.406	45.883	46.024	45.999
KJ425485 ck/CH/LDL/110931/14 China	82.38	84.714	82.38	82.38	82.45	87.265	99.255	97.478	97.707	97.736	97.764	97.506	97.163	88.006	88.433	88.319	96.79	97.736		86.268	84.572	83.803	84.725	82.067	82.038	82.067	82.067	82.067	85.413	83.618	68.49	97.509	82.161	84.721	45.831	46.024	46.077
MH779860 Ark99 field virus/18 USA	85.482	86.934	85.482	85.482	85.755	89.174	86.068	85.783	85.84	85.869	85.897	85.67	85.527	96.068	95.726	95.78	85.556	86.011	86.268		87.333	85.938	85.548	84.401	84.287	84.315	84.458	84.429	87.208	84.344	67.494	85.84	80.843	80.969	46.413	46.529	46.298
FJ904714 Cal/95 USA	88.527	90.725	88.527	88.527	85.674	86.536	84.429	84.55	84.534	84.563	84.591	84.363	84.383	86.308	86.166	86.052	84.486	84.572	84.572	87.333		97.631	89.078	87.186	87.243	87.272	87.272	87.186	88.13	87.105	66.789	84.591	80.119	80.956	46.824	46.786	46.581
GU393331 Cal56b/91 USA	88.299	90.268	88.299	88.299	85.131	85.653	83.632	83.808	83.737	83.765	83.794	83.566	83.585	85.169	85.198	85.084	83.746	83.775	83.803	85.938	97.631		89.277	87.129	87.215	87.243	87.215	87.129	87.987	86.934	66.902	83.794	79.92	80.33	46.542	46.503	46.324
FJ904715 Cal557/03 USA	85.106	86.128	85.106	85.106	83.39	84.81	84.554	84.128	84.214	84.242	84.27	84.043	83.844	84.725	84.867	84.753	84.412	84.384	84.725	85.548	89.078	89.277		84.255	84.312	84.34	84.34	84.312	88.245	84.851	66.732	84.242	80.17	80.579	46.747	46.812	46.555
MN512434 IBV/Ck/Can/17-035614/17 Canada	94.944	87.671	94.944	94.944	90.497	83.604	81.867	81.842	81.914	81.942	81.971	81.772	81.704	83.348	83.319	83.205	81.469	82.085	82.067	84.401	87.186	87.129	84.255		99.8	99.829	99.829	99.829	84.999	90.72	66.902	81.999	80.034	82.01	46.079	46.169	45.835
MN512435 IBV/Ck/Can/17-036989/17 Canada	94.916	87.7	94.916	94.916	90.497	83.575	81.839	81.813	81.886	81.914	81.942	81.743	81.704	83.234	83.205	83.091	81.44	82.056	82.038	84.287	87.243	87.215	84.312	99.8		99.971	99.686	99.686	84.999	90.663	66.93	81.971	80.063	82.038	46.182	46.22	45.938
MN512438 IBV/Ck/Can/18-049707/18 Canada	94.944	87.728	94.944	94.944	90.525	83.604	81.867	81.842	81.914	81.942	81.971	81.772	81.733	83.262	83.234	83.12	81.469	82.085	82.067	84.315	87.272	87.243	84.34	99.829	99.971		99.714	99.714	85.027	90.692	66.93	81.999	80.091	82.067	46.182	46.22	45.938
MN512436 IBV/Can/18-048192T/18 Canada	94.944	87.757	94.944	94.944	90.582	83.718	81.867	81.842	81.914	81.942	81.971	81.772	81.704	83.433	83.404	83.291	81.469	82.085	82.067	84.458	87.272	87.215	84.34	99.829	99.686	99.714		99.886	85.056	90.749	67.015	81.999	80.148	82.124	46.207	46.246	45.913
MN512437 IBV/Ck/Can/18-04830/18 Canada	94.916	87.728	94.916	94.916	90.582	83.661	81.867	81.842	81.914	81.942	81.971	81.772	81.704	83.404	83.376	83.262	81.469	82.085	82.067	84.429	87.186	87.129	84.312	99.829	99.686	99.714	99.886		85.056	90.692	66.986	81.999	80.119	82.067	46.182	46.272	45.938
MN711790 GA/1472/04 USA	86.023	87.02	86.023	86.023	84.53	85.356	85.271	85.014	85.185	85.214	85.242	85.014	84.786	85.783	85.783	85.67	84.729	85.242	85.413	87.208	88.13	87.987	88.245	84.999	84.999	85.027	85.056	85.056		85.112	67.099	85.185	80.615	80.895	46.644	46.709	46.452
MN757859 CK/CR/1160/16 Costa Rica	91.09	86.934	91.09	91.09	88.158	83.974	83.362	83.191	83.191	83.219	83.248	83.048	82.877	83.404	83.376	83.262	83.134	83.419	83.618	84.344	87.105	86.934	84.851	90.72	90.663	90.692	90.749	90.692	85.112		66.789	83.276	80.074	81.709	46.002	46.117	45.913
GU393332 Delaware 072/92 USA	66.845	66.657	66.845	66.845	66.648	67.099	68.376	68.248	68.446	68.475	68.503	68.39	68.324	67.551	67.579	67.466	67.668	68.443	68.49	67.494	66.789	66.902	66.732	66.902	66.93	66.93	67.015	66.986	67.099	66.789		68.512	66.987	67.496	43.361	43.091	43.375
KF411040 CK/CH/LLN/111169/13 China	82.341	84.749	82.341	82.341	82.383	87.037	97.28	99.397	99.627	99.656	99.684	99.426	98.852	87.521	87.949	87.835	94.389	99.37	97.509	85.84	84.591	83.794	84.242	81.999	81.971	81.999	81.999	81.999	85.185	83.276	68.512		81.589	84.406	45.78	45.921	45.871
KU317090 SAIBK2/11 China	79.892	79.152	79.892	79.892	79.533	80.928	81.904	81.504	81.532	81.561	81.589	81.389	81.246	81.697	81.839	81.725	81.732	81.532	82.161	80.843	80.119	79.92	80.17	80.034	80.063	80.091	80.148	80.119	80.615	80.074	66.987	81.589		86.021	45.548	45.638	45.433
EU637854 CK/CH/LSD/05I/08 China	80.871	80.273	80.871	80.871	82.821	81.88	84.578	84.149	84.32	84.349	84.378	84.206	83.948	82.194	82.479	82.365	84.263	84.406	84.721	80.969	80.956	80.33	80.579	82.01	82.038	82.067	82.124	82.067	80.895	81.709	67.496	84.406	86.021		45.625	45.715	45.562
EU095850 TCoV/MG10/08 Canada	46.464	46.259	46.464	46.464	46.439	46.799	45.754	45.625	45.805	45.78	45.805	45.805	45.471	46.413	46.619	46.567	46.166	45.883	45.831	46.413	46.824	46.542	46.747	46.079	46.182	46.182	46.207	46.182	46.644	46.002	43.361	45.78	45.548	45.625		97.514	95.413
GQ427175 TCoV/IN-517/94 USA	46.503	46.529	46.503	46.503	46.374	46.734	45.973	45.767	45.947	45.921	45.947	45.947	45.638	46.477	46.683	46.632	46.384	46.024	46.024	46.529	46.786	46.503	46.812	46.169	46.22	46.22	46.246	46.272	46.709	46.117	43.091	45.921	45.638	45.715	97.514		95.589
GQ427174 TCoV/TX-GL/01 USA	46.17	46.324	46.17	46.17	46.247	46.607	46.077	45.742	45.922	45.897	45.922	45.922	45.639	46.272	46.427	46.375	46.437	45.999	46.077	46.298	46.581	46.324	46.555	45.835	45.938	45.938	45.913	45.938	46.452	45.913	43.375	45.871	45.433	45.562	95.413	95.589

## Sheet: 3a
Table S1d. Nucleotide identities between sequences in the DMV dataset (n=37). Gene 3a.
	OM525800 DMV26/OH/20	OM525798 FLS/AZ/17	OM525799 DMV25/OH/20	OM525801 DMV28/OH/20	MW024789 IA1162/20 USA	AY514485 Cal/99 USA	FJ904713 Mass41/06 USA	FJ904716 Conn46/96 USA	FJ904717 Conn46/72 USA	FJ904718 Conn46/83 USA	KF696629 Conn vaccine/13 China	FJ904719 Conn46/91 USA	GU393333 FL18288/71 USA	GQ504720 ArkDPI/81 USA	KY776700 gCoV/ck/I0712/11 China	KY776701 gCoV/ck/I0108/17 China	KP868573 CK/CH/LJL/130908/15 China	KC506155 ck/CH/LJL/111054/13 China	KJ425485 ck/CH/LDL/110931/14 China	MH779860 Ark99 field virus/18 USA	FJ904714 Cal/95 USA	GU393331 Cal56b/91 USA	FJ904715 Cal557/03 USA	MN512434 IBV/Ck/Can/17-035614/17 Canada	MN512435 IBV/Ck/Can/17-036989/17 Canada	MN512438 IBV/Ck/Can/18-049707/18 Canada	MN512436 IBV/Can/18-048192T/18 Canada	MN512437 IBV/Ck/Can/18-04830/18 Canada	MN711790 GA/1472/04 USA	MN757859 CK/CR/1160/16 Costa Rica	GU393332 Delaware 072/92 USA	KF411040 CK/CH/LLN/111169/13 China	KU317090 SAIBK2/11 China	EU637854 CK/CH/LSD/05I/08 China	EU095850 TCoV/MG10/08 Canada	GQ427175 TCoV/IN-517/94 USA	GQ427174 TCoV/TX-GL/01 USA
OM525800 DMV26/OH/20		92.529	100	100	89.655	94.253	94.253	94.253	94.253	94.253	94.253	94.253	93.678	94.828	94.253	94.253	84.483	94.253	94.253	94.253	90.23	88.506	91.954	93.103	92.529	92.529	93.103	93.103	93.678	91.954	89.655	94.253	82.759	78.161	90.23	91.954	89.655
OM525798 FLS/AZ/17	92.529		92.529	92.529	91.379	97.701	97.701	97.701	97.701	97.701	97.701	97.701	97.126	91.954	91.379	91.379	85.057	97.701	97.701	97.701	93.678	88.506	91.954	96.552	95.977	95.977	96.552	96.552	94.253	96.552	89.08	97.701	81.609	78.161	94.828	96.552	89.655
OM525799 DMV25/OH/20	100	92.529		100	89.655	94.253	94.253	94.253	94.253	94.253	94.253	94.253	93.678	94.828	94.253	94.253	84.483	94.253	94.253	94.253	90.23	88.506	91.954	93.103	92.529	92.529	93.103	93.103	93.678	91.954	89.655	94.253	82.759	78.161	90.23	91.954	89.655
OM525801 DMV28/OH/20	100	92.529	100		89.655	94.253	94.253	94.253	94.253	94.253	94.253	94.253	93.678	94.828	94.253	94.253	84.483	94.253	94.253	94.253	90.23	88.506	91.954	93.103	92.529	92.529	93.103	93.103	93.678	91.954	89.655	94.253	82.759	78.161	90.23	91.954	89.655
MW024789 IA1162/20 USA	89.655	91.379	89.655	89.655		91.954	91.954	91.954	91.954	91.954	91.954	91.954	91.379	94.828	95.402	95.402	86.782	91.954	91.954	91.954	91.954	90.805	91.954	91.379	90.805	90.805	91.379	91.379	93.103	90.805	91.954	91.954	83.908	81.034	91.954	90.805	87.931
AY514485 Cal/99 USA	94.253	97.701	94.253	94.253	91.954		100	100	100	100	100	100	99.425	92.529	91.954	91.954	85.632	100	100	100	95.977	89.08	92.529	98.851	98.276	98.276	98.851	98.851	95.402	97.701	89.655	100	82.184	78.736	95.977	97.701	91.379
FJ904713 Mass41/06 USA	94.253	97.701	94.253	94.253	91.954	100		100	100	100	100	100	99.425	92.529	91.954	91.954	85.632	100	100	100	95.977	89.08	92.529	98.851	98.276	98.276	98.851	98.851	95.402	97.701	89.655	100	82.184	78.736	95.977	97.701	91.379
FJ904716 Conn46/96 USA	94.253	97.701	94.253	94.253	91.954	100	100		100	100	100	100	99.425	92.529	91.954	91.954	85.632	100	100	100	95.977	89.08	92.529	98.851	98.276	98.276	98.851	98.851	95.402	97.701	89.655	100	82.184	78.736	95.977	97.701	91.379
FJ904717 Conn46/72 USA	94.253	97.701	94.253	94.253	91.954	100	100	100		100	100	100	99.425	92.529	91.954	91.954	85.632	100	100	100	95.977	89.08	92.529	98.851	98.276	98.276	98.851	98.851	95.402	97.701	89.655	100	82.184	78.736	95.977	97.701	91.379
FJ904718 Conn46/83 USA	94.253	97.701	94.253	94.253	91.954	100	100	100	100		100	100	99.425	92.529	91.954	91.954	85.632	100	100	100	95.977	89.08	92.529	98.851	98.276	98.276	98.851	98.851	95.402	97.701	89.655	100	82.184	78.736	95.977	97.701	91.379
KF696629 Conn vaccine/13 China	94.253	97.701	94.253	94.253	91.954	100	100	100	100	100		100	99.425	92.529	91.954	91.954	85.632	100	100	100	95.977	89.08	92.529	98.851	98.276	98.276	98.851	98.851	95.402	97.701	89.655	100	82.184	78.736	95.977	97.701	91.379
FJ904719 Conn46/91 USA	94.253	97.701	94.253	94.253	91.954	100	100	100	100	100	100		99.425	92.529	91.954	91.954	85.632	100	100	100	95.977	89.08	92.529	98.851	98.276	98.276	98.851	98.851	95.402	97.701	89.655	100	82.184	78.736	95.977	97.701	91.379
GU393333 FL18288/71 USA	93.678	97.126	93.678	93.678	91.379	99.425	99.425	99.425	99.425	99.425	99.425	99.425		91.954	91.379	91.379	85.057	99.425	99.425	99.425	95.402	88.506	91.954	98.276	97.701	97.701	98.276	98.276	94.828	97.126	89.08	99.425	81.609	78.161	95.402	97.126	90.805
GQ504720 ArkDPI/81 USA	94.828	91.954	94.828	94.828	94.828	92.529	92.529	92.529	92.529	92.529	92.529	92.529	91.954		99.425	99.425	87.356	92.529	92.529	92.529	91.954	91.379	95.402	91.954	91.379	91.379	91.954	91.954	91.954	91.379	94.828	92.529	86.207	81.609	91.954	91.379	87.931
KY776700 gCoV/ck/I0712/11 China	94.253	91.379	94.253	94.253	95.402	91.954	91.954	91.954	91.954	91.954	91.954	91.954	91.379	99.425		100	87.931	91.954	91.954	91.954	91.954	91.379	94.828	91.379	90.805	90.805	91.379	91.379	92.529	90.805	95.402	91.954	85.632	81.609	91.379	90.805	87.356
KY776701 gCoV/ck/I0108/17 China	94.253	91.379	94.253	94.253	95.402	91.954	91.954	91.954	91.954	91.954	91.954	91.954	91.379	99.425	100		87.931	91.954	91.954	91.954	91.954	91.379	94.828	91.379	90.805	90.805	91.379	91.379	92.529	90.805	95.402	91.954	85.632	81.609	91.379	90.805	87.356
KP868573 CK/CH/LJL/130908/15 China	84.483	85.057	84.483	84.483	86.782	85.632	85.632	85.632	85.632	85.632	85.632	85.632	85.057	87.356	87.931	87.931		85.632	85.632	85.632	85.632	83.908	82.759	84.483	83.908	83.908	84.483	84.483	86.207	84.483	84.483	85.632	83.333	77.586	83.333	84.483	87.931
KC506155 ck/CH/LJL/111054/13 China	94.253	97.701	94.253	94.253	91.954	100	100	100	100	100	100	100	99.425	92.529	91.954	91.954	85.632		100	100	95.977	89.08	92.529	98.851	98.276	98.276	98.851	98.851	95.402	97.701	89.655	100	82.184	78.736	95.977	97.701	91.379
KJ425485 ck/CH/LDL/110931/14 China	94.253	97.701	94.253	94.253	91.954	100	100	100	100	100	100	100	99.425	92.529	91.954	91.954	85.632	100		100	95.977	89.08	92.529	98.851	98.276	98.276	98.851	98.851	95.402	97.701	89.655	100	82.184	78.736	95.977	97.701	91.379
MH779860 Ark99 field virus/18 USA	94.253	97.701	94.253	94.253	91.954	100	100	100	100	100	100	100	99.425	92.529	91.954	91.954	85.632	100	100		95.977	89.08	92.529	98.851	98.276	98.276	98.851	98.851	95.402	97.701	89.655	100	82.184	78.736	95.977	97.701	91.379
FJ904714 Cal/95 USA	90.23	93.678	90.23	90.23	91.954	95.977	95.977	95.977	95.977	95.977	95.977	95.977	95.402	91.954	91.954	91.954	85.632	95.977	95.977	95.977		93.103	91.379	95.402	95.977	95.977	95.402	95.402	91.954	93.678	90.23	95.977	82.759	80.46	93.103	94.828	88.506
GU393331 Cal56b/91 USA	88.506	88.506	88.506	88.506	90.805	89.08	89.08	89.08	89.08	89.08	89.08	89.08	88.506	91.379	91.379	91.379	83.908	89.08	89.08	89.08	93.103		91.379	88.506	89.08	89.08	88.506	88.506	91.379	87.931	87.356	89.08	83.908	79.885	87.931	89.08	87.356
FJ904715 Cal557/03 USA	91.954	91.954	91.954	91.954	91.954	92.529	92.529	92.529	92.529	92.529	92.529	92.529	91.954	95.402	94.828	94.828	82.759	92.529	92.529	92.529	91.379	91.379		91.954	91.379	91.379	91.954	91.954	90.805	91.379	91.379	92.529	83.908	79.31	91.954	91.379	87.356
MN512434 IBV/Ck/Can/17-035614/17 Canada	93.103	96.552	93.103	93.103	91.379	98.851	98.851	98.851	98.851	98.851	98.851	98.851	98.276	91.954	91.379	91.379	84.483	98.851	98.851	98.851	95.402	88.506	91.954		99.425	99.425	100	100	94.253	96.552	89.08	98.851	81.609	78.161	95.402	96.552	90.23
MN512435 IBV/Ck/Can/17-036989/17 Canada	92.529	95.977	92.529	92.529	90.805	98.276	98.276	98.276	98.276	98.276	98.276	98.276	97.701	91.379	90.805	90.805	83.908	98.276	98.276	98.276	95.977	89.08	91.379	99.425		100	99.425	99.425	93.678	95.977	89.08	98.276	81.034	78.736	94.828	95.977	90.805
MN512438 IBV/Ck/Can/18-049707/18 Canada	92.529	95.977	92.529	92.529	90.805	98.276	98.276	98.276	98.276	98.276	98.276	98.276	97.701	91.379	90.805	90.805	83.908	98.276	98.276	98.276	95.977	89.08	91.379	99.425	100		99.425	99.425	93.678	95.977	89.08	98.276	81.034	78.736	94.828	95.977	90.805
MN512436 IBV/Can/18-048192T/18 Canada	93.103	96.552	93.103	93.103	91.379	98.851	98.851	98.851	98.851	98.851	98.851	98.851	98.276	91.954	91.379	91.379	84.483	98.851	98.851	98.851	95.402	88.506	91.954	100	99.425	99.425		100	94.253	96.552	89.08	98.851	81.609	78.161	95.402	96.552	90.23
MN512437 IBV/Ck/Can/18-04830/18 Canada	93.103	96.552	93.103	93.103	91.379	98.851	98.851	98.851	98.851	98.851	98.851	98.851	98.276	91.954	91.379	91.379	84.483	98.851	98.851	98.851	95.402	88.506	91.954	100	99.425	99.425	100		94.253	96.552	89.08	98.851	81.609	78.161	95.402	96.552	90.23
MN711790 GA/1472/04 USA	93.678	94.253	93.678	93.678	93.103	95.402	95.402	95.402	95.402	95.402	95.402	95.402	94.828	91.954	92.529	92.529	86.207	95.402	95.402	95.402	91.954	91.379	90.805	94.253	93.678	93.678	94.253	94.253		93.103	89.08	95.402	81.609	79.885	91.954	94.253	91.954
MN757859 CK/CR/1160/16 Costa Rica	91.954	96.552	91.954	91.954	90.805	97.701	97.701	97.701	97.701	97.701	97.701	97.701	97.126	91.379	90.805	90.805	84.483	97.701	97.701	97.701	93.678	87.931	91.379	96.552	95.977	95.977	96.552	96.552	93.103		88.506	97.701	82.184	78.736	94.828	96.552	89.08
GU393332 Delaware 072/92 USA	89.655	89.08	89.655	89.655	91.954	89.655	89.655	89.655	89.655	89.655	89.655	89.655	89.08	94.828	95.402	95.402	84.483	89.655	89.655	89.655	90.23	87.356	91.379	89.08	89.08	89.08	89.08	89.08	89.08	88.506		89.655	82.184	79.885	89.08	88.506	84.483
KF411040 CK/CH/LLN/111169/13 China	94.253	97.701	94.253	94.253	91.954	100	100	100	100	100	100	100	99.425	92.529	91.954	91.954	85.632	100	100	100	95.977	89.08	92.529	98.851	98.276	98.276	98.851	98.851	95.402	97.701	89.655		82.184	78.736	95.977	97.701	91.379
KU317090 SAIBK2/11 China	82.759	81.609	82.759	82.759	83.908	82.184	82.184	82.184	82.184	82.184	82.184	82.184	81.609	86.207	85.632	85.632	83.333	82.184	82.184	82.184	82.759	83.908	83.908	81.609	81.034	81.034	81.609	81.609	81.609	82.184	82.184	82.184		77.011	82.759	81.034	82.184
EU637854 CK/CH/LSD/05I/08 China	78.161	78.161	78.161	78.161	81.034	78.736	78.736	78.736	78.736	78.736	78.736	78.736	78.161	81.609	81.609	81.609	77.586	78.736	78.736	78.736	80.46	79.885	79.31	78.161	78.736	78.736	78.161	78.161	79.885	78.736	79.885	78.736	77.011		79.31	78.161	80.46
EU095850 TCoV/MG10/08 Canada	90.23	94.828	90.23	90.23	91.954	95.977	95.977	95.977	95.977	95.977	95.977	95.977	95.402	91.954	91.379	91.379	83.333	95.977	95.977	95.977	93.103	87.931	91.954	95.402	94.828	94.828	95.402	95.402	91.954	94.828	89.08	95.977	82.759	79.31		95.977	88.506
GQ427175 TCoV/IN-517/94 USA	91.954	96.552	91.954	91.954	90.805	97.701	97.701	97.701	97.701	97.701	97.701	97.701	97.126	91.379	90.805	90.805	84.483	97.701	97.701	97.701	94.828	89.08	91.379	96.552	95.977	95.977	96.552	96.552	94.253	96.552	88.506	97.701	81.034	78.161	95.977		89.655
GQ427174 TCoV/TX-GL/01 USA	89.655	89.655	89.655	89.655	87.931	91.379	91.379	91.379	91.379	91.379	91.379	91.379	90.805	87.931	87.356	87.356	87.931	91.379	91.379	91.379	88.506	87.356	87.356	90.23	90.805	90.805	90.23	90.23	91.954	89.08	84.483	91.379	82.184	80.46	88.506	89.655

## Sheet: 3b
Table S1e. Nucleotide identities between sequences in the DMV dataset (n=37). Gene 3b.
	OM525800 DMV26/OH/20	OM525798 FLS/AZ/17	OM525799 DMV25/OH/20	OM525801 DMV28/OH/20	MW024789 IA1162/20 USA	AY514485 Cal/99 USA	FJ904713 Mass41/06 USA	FJ904716 Conn46/96 USA	FJ904717 Conn46/72 USA	FJ904718 Conn46/83 USA	KF696629 Conn vaccine/13 China	FJ904719 Conn46/91 USA	GU393333 FL18288/71 USA	GQ504720 ArkDPI/81 USA	KY776700 gCoV/ck/I0712/11 China	KY776701 gCoV/ck/I0108/17 China	KP868573 CK/CH/LJL/130908/15 China	KC506155 ck/CH/LJL/111054/13 China	KJ425485 ck/CH/LDL/110931/14 China	MH779860 Ark99 field virus/18 USA	FJ904714 Cal/95 USA	GU393331 Cal56b/91 USA	FJ904715 Cal557/03 USA	MN512434 IBV/Ck/Can/17-035614/17 Canada	MN512435 IBV/Ck/Can/17-036989/17 Canada	MN512438 IBV/Ck/Can/18-049707/18 Canada	MN512436 IBV/Can/18-048192T/18 Canada	MN512437 IBV/Ck/Can/18-04830/18 Canada	MN711790 GA/1472/04 USA	MN757859 CK/CR/1160/16 Costa Rica	GU393332 Delaware 072/92 USA	KF411040 CK/CH/LLN/111169/13 China	KU317090 SAIBK2/11 China	EU637854 CK/CH/LSD/05I/08 China	EU095850 TCoV/MG10/08 Canada	GQ427175 TCoV/IN-517/94 USA	GQ427174 TCoV/TX-GL/01 USA
OM525800 DMV26/OH/20		94.359	100	100	91.795	95.385	95.385	95.385	95.385	95.385	95.385	95.385	95.385	95.385	95.385	95.385	91.282	95.385	95.385	95.897	91.282	93.333	92.821	94.872	94.872	94.872	94.872	94.872	94.872	92.821	96.41	95.385	71.795	83.59	94.872	94.872	85.641
OM525798 FLS/AZ/17	94.359		94.359	94.359	93.333	95.385	96.41	96.41	96.41	96.41	96.41	96.41	95.385	95.385	95.385	95.385	90.769	96.41	96.41	95.897	92.308	94.359	92.308	95.897	95.897	95.897	96.923	96.923	94.872	93.333	96.41	96.41	72.821	84.103	94.872	94.872	85.128
OM525799 DMV25/OH/20	100	94.359		100	91.795	95.385	95.385	95.385	95.385	95.385	95.385	95.385	95.385	95.385	95.385	95.385	91.282	95.385	95.385	95.897	91.282	93.333	92.821	94.872	94.872	94.872	94.872	94.872	94.872	92.821	96.41	95.385	71.795	83.59	94.872	94.872	85.641
OM525801 DMV28/OH/20	100	94.359	100		91.795	95.385	95.385	95.385	95.385	95.385	95.385	95.385	95.385	95.385	95.385	95.385	91.282	95.385	95.385	95.897	91.282	93.333	92.821	94.872	94.872	94.872	94.872	94.872	94.872	92.821	96.41	95.385	71.795	83.59	94.872	94.872	85.641
MW024789 IA1162/20 USA	91.795	93.333	91.795	91.795		94.872	95.897	95.897	95.897	95.897	95.897	95.897	94.872	94.872	94.872	94.872	90.769	95.897	95.897	94.359	91.282	92.821	91.795	94.872	94.872	94.872	93.846	93.846	93.846	91.282	93.846	95.897	75.385	81.538	94.359	95.385	82.564
AY514485 Cal/99 USA	95.385	95.385	95.385	95.385	94.872		98.974	98.974	98.974	98.974	98.974	98.974	97.949	98.974	98.974	98.974	93.333	98.974	98.974	98.462	93.846	95.897	93.333	97.436	97.436	97.436	96.41	96.41	97.949	94.359	97.949	98.974	73.333	84.615	98.462	98.462	84.615
FJ904713 Mass41/06 USA	95.385	96.41	95.385	95.385	95.897	98.974		100	100	100	100	100	98.974	98.974	98.974	98.974	93.333	100	100	98.462	93.846	95.897	93.333	98.462	98.462	98.462	97.436	97.436	97.949	94.359	97.949	100	73.333	84.103	98.462	98.462	84.615
FJ904716 Conn46/96 USA	95.385	96.41	95.385	95.385	95.897	98.974	100		100	100	100	100	98.974	98.974	98.974	98.974	93.333	100	100	98.462	93.846	95.897	93.333	98.462	98.462	98.462	97.436	97.436	97.949	94.359	97.949	100	73.333	84.103	98.462	98.462	84.615
FJ904717 Conn46/72 USA	95.385	96.41	95.385	95.385	95.897	98.974	100	100		100	100	100	98.974	98.974	98.974	98.974	93.333	100	100	98.462	93.846	95.897	93.333	98.462	98.462	98.462	97.436	97.436	97.949	94.359	97.949	100	73.333	84.103	98.462	98.462	84.615
FJ904718 Conn46/83 USA	95.385	96.41	95.385	95.385	95.897	98.974	100	100	100		100	100	98.974	98.974	98.974	98.974	93.333	100	100	98.462	93.846	95.897	93.333	98.462	98.462	98.462	97.436	97.436	97.949	94.359	97.949	100	73.333	84.103	98.462	98.462	84.615
KF696629 Conn vaccine/13 China	95.385	96.41	95.385	95.385	95.897	98.974	100	100	100	100		100	98.974	98.974	98.974	98.974	93.333	100	100	98.462	93.846	95.897	93.333	98.462	98.462	98.462	97.436	97.436	97.949	94.359	97.949	100	73.333	84.103	98.462	98.462	84.615
FJ904719 Conn46/91 USA	95.385	96.41	95.385	95.385	95.897	98.974	100	100	100	100	100		98.974	98.974	98.974	98.974	93.333	100	100	98.462	93.846	95.897	93.333	98.462	98.462	98.462	97.436	97.436	97.949	94.359	97.949	100	73.333	84.103	98.462	98.462	84.615
GU393333 FL18288/71 USA	95.385	95.385	95.385	95.385	94.872	97.949	98.974	98.974	98.974	98.974	98.974	98.974		97.949	97.949	97.949	92.308	98.974	98.974	97.436	92.821	94.872	93.333	97.436	97.436	97.436	96.41	96.41	96.923	93.333	96.923	98.974	72.308	84.103	97.436	97.436	84.615
GQ504720 ArkDPI/81 USA	95.385	95.385	95.385	95.385	94.872	98.974	98.974	98.974	98.974	98.974	98.974	98.974	97.949		100	100	93.846	98.974	98.974	98.462	93.846	95.897	93.333	97.949	97.949	97.949	96.923	96.923	97.949	95.385	97.949	98.974	73.846	84.103	98.462	98.462	85.128
KY776700 gCoV/ck/I0712/11 China	95.385	95.385	95.385	95.385	94.872	98.974	98.974	98.974	98.974	98.974	98.974	98.974	97.949	100		100	93.846	98.974	98.974	98.462	93.846	95.897	93.333	97.949	97.949	97.949	96.923	96.923	97.949	95.385	97.949	98.974	73.846	84.103	98.462	98.462	85.128
KY776701 gCoV/ck/I0108/17 China	95.385	95.385	95.385	95.385	94.872	98.974	98.974	98.974	98.974	98.974	98.974	98.974	97.949	100	100		93.846	98.974	98.974	98.462	93.846	95.897	93.333	97.949	97.949	97.949	96.923	96.923	97.949	95.385	97.949	98.974	73.846	84.103	98.462	98.462	85.128
KP868573 CK/CH/LJL/130908/15 China	91.282	90.769	91.282	91.282	90.769	93.333	93.333	93.333	93.333	93.333	93.333	93.333	92.308	93.846	93.846	93.846		93.333	93.333	92.821	90.769	91.795	91.795	92.821	92.821	92.821	91.795	91.795	92.308	90.256	92.308	93.333	72.308	83.077	92.821	92.821	90.256
KC506155 ck/CH/LJL/111054/13 China	95.385	96.41	95.385	95.385	95.897	98.974	100	100	100	100	100	100	98.974	98.974	98.974	98.974	93.333		100	98.462	93.846	95.897	93.333	98.462	98.462	98.462	97.436	97.436	97.949	94.359	97.949	100	73.333	84.103	98.462	98.462	84.615
KJ425485 ck/CH/LDL/110931/14 China	95.385	96.41	95.385	95.385	95.897	98.974	100	100	100	100	100	100	98.974	98.974	98.974	98.974	93.333	100		98.462	93.846	95.897	93.333	98.462	98.462	98.462	97.436	97.436	97.949	94.359	97.949	100	73.333	84.103	98.462	98.462	84.615
MH779860 Ark99 field virus/18 USA	95.897	95.897	95.897	95.897	94.359	98.462	98.462	98.462	98.462	98.462	98.462	98.462	97.436	98.462	98.462	98.462	92.821	98.462	98.462		95.385	97.436	92.821	96.923	96.923	96.923	96.923	96.923	97.436	94.872	98.462	98.462	74.872	85.128	98.974	97.949	86.154
FJ904714 Cal/95 USA	91.282	92.308	91.282	91.282	91.282	93.846	93.846	93.846	93.846	93.846	93.846	93.846	92.821	93.846	93.846	93.846	90.769	93.846	93.846	95.385		97.949	91.282	92.308	92.308	92.308	92.308	92.308	92.821	91.282	93.846	93.846	73.846	83.077	94.359	93.333	84.103
GU393331 Cal56b/91 USA	93.333	94.359	93.333	93.333	92.821	95.897	95.897	95.897	95.897	95.897	95.897	95.897	94.872	95.897	95.897	95.897	91.795	95.897	95.897	97.436	97.949		93.333	94.359	94.359	94.359	94.359	94.359	94.872	93.333	95.897	95.897	75.385	85.128	96.41	95.385	86.154
FJ904715 Cal557/03 USA	92.821	92.308	92.821	92.821	91.795	93.333	93.333	93.333	93.333	93.333	93.333	93.333	93.333	93.333	93.333	93.333	91.795	93.333	93.333	92.821	91.282	93.333		93.333	93.333	93.333	92.308	92.308	92.821	90.769	93.333	93.333	71.795	84.615	92.821	92.821	86.154
MN512434 IBV/Ck/Can/17-035614/17 Canada	94.872	95.897	94.872	94.872	94.872	97.436	98.462	98.462	98.462	98.462	98.462	98.462	97.436	97.949	97.949	97.949	92.821	98.462	98.462	96.923	92.308	94.359	93.333		100	100	98.974	98.974	96.923	94.359	97.436	98.462	73.333	84.103	96.923	96.923	85.641
MN512435 IBV/Ck/Can/17-036989/17 Canada	94.872	95.897	94.872	94.872	94.872	97.436	98.462	98.462	98.462	98.462	98.462	98.462	97.436	97.949	97.949	97.949	92.821	98.462	98.462	96.923	92.308	94.359	93.333	100		100	98.974	98.974	96.923	94.359	97.436	98.462	73.333	84.103	96.923	96.923	85.641
MN512438 IBV/Ck/Can/18-049707/18 Canada	94.872	95.897	94.872	94.872	94.872	97.436	98.462	98.462	98.462	98.462	98.462	98.462	97.436	97.949	97.949	97.949	92.821	98.462	98.462	96.923	92.308	94.359	93.333	100	100		98.974	98.974	96.923	94.359	97.436	98.462	73.333	84.103	96.923	96.923	85.641
MN512436 IBV/Can/18-048192T/18 Canada	94.872	96.923	94.872	94.872	93.846	96.41	97.436	97.436	97.436	97.436	97.436	97.436	96.41	96.923	96.923	96.923	91.795	97.436	97.436	96.923	92.308	94.359	92.308	98.974	98.974	98.974		100	95.897	94.872	97.436	97.436	73.333	85.128	95.897	95.897	85.641
MN512437 IBV/Ck/Can/18-04830/18 Canada	94.872	96.923	94.872	94.872	93.846	96.41	97.436	97.436	97.436	97.436	97.436	97.436	96.41	96.923	96.923	96.923	91.795	97.436	97.436	96.923	92.308	94.359	92.308	98.974	98.974	98.974	100		95.897	94.872	97.436	97.436	73.333	85.128	95.897	95.897	85.641
MN711790 GA/1472/04 USA	94.872	94.872	94.872	94.872	93.846	97.949	97.949	97.949	97.949	97.949	97.949	97.949	96.923	97.949	97.949	97.949	92.308	97.949	97.949	97.436	92.821	94.872	92.821	96.923	96.923	96.923	95.897	95.897		93.846	97.436	97.949	73.846	84.615	97.436	97.436	84.615
MN757859 CK/CR/1160/16 Costa Rica	92.821	93.333	92.821	92.821	91.282	94.359	94.359	94.359	94.359	94.359	94.359	94.359	93.333	95.385	95.385	95.385	90.256	94.359	94.359	94.872	91.282	93.333	90.769	94.359	94.359	94.359	94.872	94.872	93.846		95.385	94.359	72.821	84.615	93.846	93.846	85.128
GU393332 Delaware 072/92 USA	96.41	96.41	96.41	96.41	93.846	97.949	97.949	97.949	97.949	97.949	97.949	97.949	96.923	97.949	97.949	97.949	92.308	97.949	97.949	98.462	93.846	95.897	93.333	97.436	97.436	97.436	97.436	97.436	97.436	95.385		97.949	73.333	85.128	98.462	97.436	85.641
KF411040 CK/CH/LLN/111169/13 China	95.385	96.41	95.385	95.385	95.897	98.974	100	100	100	100	100	100	98.974	98.974	98.974	98.974	93.333	100	100	98.462	93.846	95.897	93.333	98.462	98.462	98.462	97.436	97.436	97.949	94.359	97.949		73.333	84.103	98.462	98.462	84.615
KU317090 SAIBK2/11 China	71.795	72.821	71.795	71.795	75.385	73.333	73.333	73.333	73.333	73.333	73.333	73.333	72.308	73.846	73.846	73.846	72.308	73.333	73.333	74.872	73.846	75.385	71.795	73.333	73.333	73.333	73.333	73.333	73.846	72.821	73.333	73.333		72.821	73.846	73.846	77.436
EU637854 CK/CH/LSD/05I/08 China	83.59	84.103	83.59	83.59	81.538	84.615	84.103	84.103	84.103	84.103	84.103	84.103	84.103	84.103	84.103	84.103	83.077	84.103	84.103	85.128	83.077	85.128	84.615	84.103	84.103	84.103	85.128	85.128	84.615	84.615	85.128	84.103	72.821		84.103	83.59	84.615
EU095850 TCoV/MG10/08 Canada	94.872	94.872	94.872	94.872	94.359	98.462	98.462	98.462	98.462	98.462	98.462	98.462	97.436	98.462	98.462	98.462	92.821	98.462	98.462	98.974	94.359	96.41	92.821	96.923	96.923	96.923	95.897	95.897	97.436	93.846	98.462	98.462	73.846	84.103		97.949	85.128
GQ427175 TCoV/IN-517/94 USA	94.872	94.872	94.872	94.872	95.385	98.462	98.462	98.462	98.462	98.462	98.462	98.462	97.436	98.462	98.462	98.462	92.821	98.462	98.462	97.949	93.333	95.385	92.821	96.923	96.923	96.923	95.897	95.897	97.436	93.846	97.436	98.462	73.846	83.59	97.949		84.103
GQ427174 TCoV/TX-GL/01 USA	85.641	85.128	85.641	85.641	82.564	84.615	84.615	84.615	84.615	84.615	84.615	84.615	84.615	85.128	85.128	85.128	90.256	84.615	84.615	86.154	84.103	86.154	86.154	85.641	85.641	85.641	85.641	85.641	84.615	85.128	85.641	84.615	77.436	84.615	85.128	84.103

## Sheet: Envelope
Table S1f. Nucleotide identities between sequences in the DMV dataset (n=37). Envelope gene.
	OM525800 DMV26/OH/20	OM525798 FLS/AZ/17	OM525799 DMV25/OH/20	OM525801 DMV28/OH/20	MW024789 IA1162/20 USA	AY514485 Cal/99 USA	FJ904713 Mass41/06 USA	FJ904716 Conn46/96 USA	FJ904717 Conn46/72 USA	FJ904718 Conn46/83 USA	KF696629 Conn vaccine/13 China	FJ904719 Conn46/91 USA	GU393333 FL18288/71 USA	GQ504720 ArkDPI/81 USA	KY776700 gCoV/ck/I0712/11 China	KY776701 gCoV/ck/I0108/17 China	KP868573 CK/CH/LJL/130908/15 China	KC506155 ck/CH/LJL/111054/13 China	KJ425485 ck/CH/LDL/110931/14 China	MH779860 Ark99 field virus/18 USA	FJ904714 Cal/95 USA	GU393331 Cal56b/91 USA	FJ904715 Cal557/03 USA	MN512434 IBV/Ck/Can/17-035614/17 Canada	MN512435 IBV/Ck/Can/17-036989/17 Canada	MN512438 IBV/Ck/Can/18-049707/18 Canada	MN512436 IBV/Can/18-048192T/18 Canada	MN512437 IBV/Ck/Can/18-04830/18 Canada	MN711790 GA/1472/04 USA	MN757859 CK/CR/1160/16 Costa Rica	GU393332 Delaware 072/92 USA	KF411040 CK/CH/LLN/111169/13 China	KU317090 SAIBK2/11 China	EU637854 CK/CH/LSD/05I/08 China	EU095850 TCoV/MG10/08 Canada	GQ427175 TCoV/IN-517/94 USA	GQ427174 TCoV/TX-GL/01 USA
OM525800 DMV26/OH/20		85.758	100	100	91.049	87.879	93.827	93.519	93.519	93.519	93.519	93.519	92.284	93.21	93.21	93.21	93.21	93.519	93.519	91.987	86.869	85.185	88.552	90	90	90	90	90	88.629	87.879	89.697	93.519	83.636	87.576	90.667	92.667	87.667
OM525798 FLS/AZ/17	85.758		85.758	85.758	87.879	92.121	88.182	89.091	89.091	89.091	89.091	89.091	87.273	89.091	89.091	89.091	89.091	89.091	89.091	87.107	79.538	78.878	84.158	93.939	93.939	93.939	93.939	93.636	81.35	94.242	92.727	89.091	85.758	89.394	90	92	90.667
OM525799 DMV25/OH/20	100	85.758		100	91.049	87.879	93.827	93.519	93.519	93.519	93.519	93.519	92.284	93.21	93.21	93.21	93.21	93.519	93.519	91.987	86.869	85.185	88.552	90	90	90	90	90	88.629	87.879	89.697	93.519	83.636	87.576	90.667	92.667	87.667
OM525801 DMV28/OH/20	100	85.758	100		91.049	87.879	93.827	93.519	93.519	93.519	93.519	93.519	92.284	93.21	93.21	93.21	93.21	93.519	93.519	91.987	86.869	85.185	88.552	90	90	90	90	90	88.629	87.879	89.697	93.519	83.636	87.576	90.667	92.667	87.667
MW024789 IA1162/20 USA	91.049	87.879	91.049	91.049		89.697	96.605	96.914	96.914	96.914	96.914	96.914	95.37	96.914	96.914	96.914	96.914	96.914	96.914	92.949	84.158	84.158	85.809	88.485	88.485	88.485	88.485	88.485	85.574	86.364	89.091	96.914	83.939	88.182	92.333	94.333	87.333
AY514485 Cal/99 USA	87.879	92.121	87.879	87.879	89.697		90.909	91.818	91.818	91.818	91.818	91.818	90	92.121	92.121	92.121	92.121	91.818	91.818	90.881	83.828	83.498	83.828	94.242	94.242	94.242	94.242	93.636	83.923	91.818	94.242	91.818	88.788	92.121	91.667	93.667	90
FJ904713 Mass41/06 USA	93.827	88.182	93.827	93.827	96.605	90.909		98.457	98.457	98.457	98.457	98.457	96.605	98.148	98.148	98.148	98.148	98.457	98.457	94.231	85.479	83.828	86.469	91.212	91.212	91.212	91.212	91.212	87.213	88.485	92.424	98.457	85.758	88.788	94.333	96.333	88.333
FJ904716 Conn46/96 USA	93.519	89.091	93.519	93.519	96.914	91.818	98.457		100	100	100	100	98.148	99.691	99.691	99.691	99.691	100	100	95.192	85.809	84.158	86.139	90.909	90.909	90.909	90.909	90.909	87.541	88.788	90.909	100	86.061	89.697	94.667	96.667	89.333
FJ904717 Conn46/72 USA	93.519	89.091	93.519	93.519	96.914	91.818	98.457	100		100	100	100	98.148	99.691	99.691	99.691	99.691	100	100	95.192	85.809	84.158	86.139	90.909	90.909	90.909	90.909	90.909	87.541	88.788	90.909	100	86.061	89.697	94.667	96.667	89.333
FJ904718 Conn46/83 USA	93.519	89.091	93.519	93.519	96.914	91.818	98.457	100	100		100	100	98.148	99.691	99.691	99.691	99.691	100	100	95.192	85.809	84.158	86.139	90.909	90.909	90.909	90.909	90.909	87.541	88.788	90.909	100	86.061	89.697	94.667	96.667	89.333
KF696629 Conn vaccine/13 China	93.519	89.091	93.519	93.519	96.914	91.818	98.457	100	100	100		100	98.148	99.691	99.691	99.691	99.691	100	100	95.192	85.809	84.158	86.139	90.909	90.909	90.909	90.909	90.909	87.541	88.788	90.909	100	86.061	89.697	94.667	96.667	89.333
FJ904719 Conn46/91 USA	93.519	89.091	93.519	93.519	96.914	91.818	98.457	100	100	100	100		98.148	99.691	99.691	99.691	99.691	100	100	95.192	85.809	84.158	86.139	90.909	90.909	90.909	90.909	90.909	87.541	88.788	90.909	100	86.061	89.697	94.667	96.667	89.333
GU393333 FL18288/71 USA	92.284	87.273	92.284	92.284	95.37	90	96.605	98.148	98.148	98.148	98.148	98.148		97.84	97.84	97.84	97.84	98.148	98.148	93.269	84.818	83.828	85.809	89.697	89.697	89.697	89.697	89.697	87.129	86.97	89.091	98.148	84.848	88.485	93.333	95.333	88.667
GQ504720 ArkDPI/81 USA	93.21	89.091	93.21	93.21	96.914	92.121	98.148	99.691	99.691	99.691	99.691	99.691	97.84		100	100	100	99.691	99.691	95.513	85.479	84.488	86.139	90.606	90.606	90.606	90.606	90.606	87.869	88.485	90.606	99.691	85.758	89.697	94.333	96.333	89.667
KY776700 gCoV/ck/I0712/11 China	93.21	89.091	93.21	93.21	96.914	92.121	98.148	99.691	99.691	99.691	99.691	99.691	97.84	100		100	100	99.691	99.691	95.513	85.479	84.488	86.139	90.606	90.606	90.606	90.606	90.606	87.869	88.485	90.606	99.691	85.758	89.697	94.333	96.333	89.667
KY776701 gCoV/ck/I0108/17 China	93.21	89.091	93.21	93.21	96.914	92.121	98.148	99.691	99.691	99.691	99.691	99.691	97.84	100	100		100	99.691	99.691	95.513	85.479	84.488	86.139	90.606	90.606	90.606	90.606	90.606	87.869	88.485	90.606	99.691	85.758	89.697	94.333	96.333	89.667
KP868573 CK/CH/LJL/130908/15 China	93.21	89.091	93.21	93.21	96.914	92.121	98.148	99.691	99.691	99.691	99.691	99.691	97.84	100	100	100		99.691	99.691	95.513	85.479	84.488	86.139	90.606	90.606	90.606	90.606	90.606	87.869	88.485	90.606	99.691	85.758	89.697	94.333	96.333	89.667
KC506155 ck/CH/LJL/111054/13 China	93.519	89.091	93.519	93.519	96.914	91.818	98.457	100	100	100	100	100	98.148	99.691	99.691	99.691	99.691		100	95.192	85.809	84.158	86.139	90.909	90.909	90.909	90.909	90.909	87.541	88.788	90.909	100	86.061	89.697	94.667	96.667	89.333
KJ425485 ck/CH/LDL/110931/14 China	93.519	89.091	93.519	93.519	96.914	91.818	98.457	100	100	100	100	100	98.148	99.691	99.691	99.691	99.691	100		95.192	85.809	84.158	86.139	90.909	90.909	90.909	90.909	90.909	87.541	88.788	90.909	100	86.061	89.697	94.667	96.667	89.333
MH779860 Ark99 field virus/18 USA	91.987	87.107	91.987	91.987	92.949	90.881	94.231	95.192	95.192	95.192	95.192	95.192	93.269	95.513	95.513	95.513	95.513	95.192	95.192		84.488	83.498	84.158	89.308	89.308	89.308	89.308	89.623	86.23	87.421	89.308	95.192	85.22	88.679	92	94	88.667
FJ904714 Cal/95 USA	86.869	79.538	86.869	86.869	84.158	83.828	85.479	85.809	85.809	85.809	85.809	85.809	84.818	85.479	85.479	85.479	85.479	85.809	85.809	84.488		96.809	90.426	82.838	82.838	82.838	82.838	82.508	92.553	82.508	83.498	85.809	83.168	83.168	84	85.333	82
GU393331 Cal56b/91 USA	85.185	78.878	85.185	85.185	84.158	83.498	83.828	84.158	84.158	84.158	84.158	84.158	83.828	84.488	84.488	84.488	84.488	84.158	84.158	83.498	96.809		89.716	82.508	82.508	82.508	82.508	82.178	91.489	81.188	82.508	84.158	81.518	81.848	83.333	83.667	81.667
FJ904715 Cal557/03 USA	88.552	84.158	88.552	88.552	85.809	83.828	86.469	86.139	86.139	86.139	86.139	86.139	85.809	86.139	86.139	86.139	86.139	86.139	86.139	84.158	90.426	89.716		85.149	85.149	85.149	85.149	84.818	92.199	82.838	85.809	86.139	78.218	83.498	83.667	85	81.333
MN512434 IBV/Ck/Can/17-035614/17 Canada	90	93.939	90	90	88.485	94.242	91.212	90.909	90.909	90.909	90.909	90.909	89.697	90.606	90.606	90.606	90.606	90.909	90.909	89.308	82.838	82.508	85.149		100	100	100	99.394	83.601	95.455	96.97	90.909	88.788	91.515	91.333	94	89.667
MN512435 IBV/Ck/Can/17-036989/17 Canada	90	93.939	90	90	88.485	94.242	91.212	90.909	90.909	90.909	90.909	90.909	89.697	90.606	90.606	90.606	90.606	90.909	90.909	89.308	82.838	82.508	85.149	100		100	100	99.394	83.601	95.455	96.97	90.909	88.788	91.515	91.333	94	89.667
MN512438 IBV/Ck/Can/18-049707/18 Canada	90	93.939	90	90	88.485	94.242	91.212	90.909	90.909	90.909	90.909	90.909	89.697	90.606	90.606	90.606	90.606	90.909	90.909	89.308	82.838	82.508	85.149	100	100		100	99.394	83.601	95.455	96.97	90.909	88.788	91.515	91.333	94	89.667
MN512436 IBV/Can/18-048192T/18 Canada	90	93.939	90	90	88.485	94.242	91.212	90.909	90.909	90.909	90.909	90.909	89.697	90.606	90.606	90.606	90.606	90.909	90.909	89.308	82.838	82.508	85.149	100	100	100		99.394	83.601	95.455	96.97	90.909	88.788	91.515	91.333	94	89.667
MN512437 IBV/Ck/Can/18-04830/18 Canada	90	93.636	90	90	88.485	93.636	91.212	90.909	90.909	90.909	90.909	90.909	89.697	90.606	90.606	90.606	90.606	90.909	90.909	89.623	82.508	82.178	84.818	99.394	99.394	99.394	99.394		83.28	94.848	96.364	90.909	88.788	91.515	91.667	94.333	89.333
MN711790 GA/1472/04 USA	88.629	81.35	88.629	88.629	85.574	83.923	87.213	87.541	87.541	87.541	87.541	87.541	87.129	87.869	87.869	87.869	87.869	87.541	87.541	86.23	92.553	91.489	92.199	83.601	83.601	83.601	83.601	83.28		83.923	83.601	87.541	79.1	81.029	86	88	83
MN757859 CK/CR/1160/16 Costa Rica	87.879	94.242	87.879	87.879	86.364	91.818	88.485	88.788	88.788	88.788	88.788	88.788	86.97	88.485	88.485	88.485	88.485	88.788	88.788	87.421	82.508	81.188	82.838	95.455	95.455	95.455	95.455	94.848	83.923		94.242	88.788	88.485	90.303	91.667	93.667	91.667
GU393332 Delaware 072/92 USA	89.697	92.727	89.697	89.697	89.091	94.242	92.424	90.909	90.909	90.909	90.909	90.909	89.091	90.606	90.606	90.606	90.606	90.909	90.909	89.308	83.498	82.508	85.809	96.97	96.97	96.97	96.97	96.364	83.601	94.242		90.909	86.97	91.515	91.667	94.333	90
KF411040 CK/CH/LLN/111169/13 China	93.519	89.091	93.519	93.519	96.914	91.818	98.457	100	100	100	100	100	98.148	99.691	99.691	99.691	99.691	100	100	95.192	85.809	84.158	86.139	90.909	90.909	90.909	90.909	90.909	87.541	88.788	90.909		86.061	89.697	94.667	96.667	89.333
KU317090 SAIBK2/11 China	83.636	85.758	83.636	83.636	83.939	88.788	85.758	86.061	86.061	86.061	86.061	86.061	84.848	85.758	85.758	85.758	85.758	86.061	86.061	85.22	83.168	81.518	78.218	88.788	88.788	88.788	88.788	88.788	79.1	88.485	86.97	86.061		89.091	86	87.667	85
EU637854 CK/CH/LSD/05I/08 China	87.576	89.394	87.576	87.576	88.182	92.121	88.788	89.697	89.697	89.697	89.697	89.697	88.485	89.697	89.697	89.697	89.697	89.697	89.697	88.679	83.168	81.848	83.498	91.515	91.515	91.515	91.515	91.515	81.029	90.303	91.515	89.697	89.091		89.333	91.333	88.667
EU095850 TCoV/MG10/08 Canada	90.667	90	90.667	90.667	92.333	91.667	94.333	94.667	94.667	94.667	94.667	94.667	93.333	94.333	94.333	94.333	94.333	94.667	94.667	92	84	83.333	83.667	91.333	91.333	91.333	91.333	91.667	86	91.667	91.667	94.667	86	89.333		97.333	92
GQ427175 TCoV/IN-517/94 USA	92.667	92	92.667	92.667	94.333	93.667	96.333	96.667	96.667	96.667	96.667	96.667	95.333	96.333	96.333	96.333	96.333	96.667	96.667	94	85.333	83.667	85	94	94	94	94	94.333	88	93.667	94.333	96.667	87.667	91.333	97.333		91.333
GQ427174 TCoV/TX-GL/01 USA	87.667	90.667	87.667	87.667	87.333	90	88.333	89.333	89.333	89.333	89.333	89.333	88.667	89.667	89.667	89.667	89.667	89.333	89.333	88.667	82	81.667	81.333	89.667	89.667	89.667	89.667	89.333	83	91.667	90	89.333	85	88.667	92	91.333

## Sheet: Membrane
Table S1g. Nucleotide identities between sequences in the DMV dataset (n=37). Membrane gene.
	OM525800 DMV26/OH/20	OM525798 FLS/AZ/17	OM525799 DMV25/OH/20	OM525801 DMV28/OH/20	MW024789 IA1162/20 USA	AY514485 Cal/99 USA	FJ904713 Mass41/06 USA	FJ904716 Conn46/96 USA	FJ904717 Conn46/72 USA	FJ904718 Conn46/83 USA	KF696629 Conn vaccine/13 China	FJ904719 Conn46/91 USA	GU393333 FL18288/71 USA	GQ504720 ArkDPI/81 USA	KY776700 gCoV/ck/I0712/11 China	KY776701 gCoV/ck/I0108/17 China	KP868573 CK/CH/LJL/130908/15 China	KC506155 ck/CH/LJL/111054/13 China	KJ425485 ck/CH/LDL/110931/14 China	MH779860 Ark99 field virus/18 USA	FJ904714 Cal/95 USA	GU393331 Cal56b/91 USA	FJ904715 Cal557/03 USA	MN512434 IBV/Ck/Can/17-035614/17 Canada	MN512435 IBV/Ck/Can/17-036989/17 Canada	MN512438 IBV/Ck/Can/18-049707/18 Canada	MN512436 IBV/Can/18-048192T/18 Canada	MN512437 IBV/Ck/Can/18-04830/18 Canada	MN711790 GA/1472/04 USA	MN757859 CK/CR/1160/16 Costa Rica	GU393332 Delaware 072/92 USA	KF411040 CK/CH/LLN/111169/13 China	KU317090 SAIBK2/11 China	EU637854 CK/CH/LSD/05I/08 China	EU095850 TCoV/MG10/08 Canada	GQ427175 TCoV/IN-517/94 USA	GQ427174 TCoV/TX-GL/01 USA
OM525800 DMV26/OH/20		92.92	100	100	94.345	93.363	95.982	95.833	95.833	95.833	95.833	95.833	95.815	95.833	95.833	95.833	95.833	95.833	95.833	95.387	88.757	93.143	89.153	90.118	89.676	89.676	89.823	89.971	93.304	90.708	89.823	95.815	89.971	94.1	93.546	95.104	92.183
OM525798 FLS/AZ/17	92.92		92.92	92.92	93.51	94.838	95.133	95.133	95.28	95.28	95.28	95.133	96.114	95.133	95.133	95.133	95.133	95.28	95.28	94.838	89.823	93.143	90.265	90.56	90.118	90.118	90.265	90.56	91.445	91.15	91.15	96.114	91.298	94.985	92.552	94.69	93.805
OM525799 DMV25/OH/20	100	92.92		100	94.345	93.363	95.982	95.833	95.833	95.833	95.833	95.833	95.815	95.833	95.833	95.833	95.833	95.833	95.833	95.387	88.757	93.143	89.153	90.118	89.676	89.676	89.823	89.971	93.304	90.708	89.823	95.815	89.971	94.1	93.546	95.104	92.183
OM525801 DMV28/OH/20	100	92.92	100		94.345	93.363	95.982	95.833	95.833	95.833	95.833	95.833	95.815	95.833	95.833	95.833	95.833	95.833	95.833	95.387	88.757	93.143	89.153	90.118	89.676	89.676	89.823	89.971	93.304	90.708	89.823	95.815	89.971	94.1	93.546	95.104	92.183
MW024789 IA1162/20 USA	94.345	93.51	94.345	94.345		94.543	98.363	98.065	98.214	98.214	98.214	98.065	98.356	98.065	98.065	98.065	98.065	98.214	98.214	95.833	89.053	93.714	90.639	89.233	88.791	88.791	88.938	89.086	93.452	89.528	88.201	98.356	89.676	94.1	94.139	96.439	91.15
AY514485 Cal/99 USA	93.363	94.838	93.363	93.363	94.543		96.165	96.46	96.313	96.313	96.313	96.46	97.16	96.46	96.46	96.46	96.46	96.313	96.313	94.838	89.381	93.714	90.265	92.625	92.183	92.183	92.33	92.478	93.215	93.068	91.74	97.16	91.593	96.46	93.584	96.313	92.92
FJ904713 Mass41/06 USA	95.982	95.133	95.982	95.982	98.363	96.165		99.702	99.851	99.851	99.851	99.702	99.851	99.702	99.702	99.702	99.702	99.851	99.851	97.173	89.645	94.286	91.828	90.56	90.118	90.118	90.265	90.413	94.792	90.855	89.528	99.851	91.003	95.723	95.475	98.071	92.478
FJ904716 Conn46/96 USA	95.833	95.133	95.833	95.833	98.065	96.46	99.702		99.851	99.851	99.851	100	99.851	100	100	100	100	99.851	99.851	96.875	89.497	94.286	91.828	90.708	90.265	90.265	90.413	90.56	94.792	91.003	89.676	99.851	90.708	95.723	95.475	98.071	92.33
FJ904717 Conn46/72 USA	95.833	95.28	95.833	95.833	98.214	96.313	99.851	99.851		100	100	99.851	100	99.851	99.851	99.851	99.851	100	100	97.024	89.645	94.286	91.976	90.56	90.118	90.118	90.265	90.413	94.94	90.855	89.528	100	90.855	95.87	95.623	98.22	92.478
FJ904718 Conn46/83 USA	95.833	95.28	95.833	95.833	98.214	96.313	99.851	99.851	100		100	99.851	100	99.851	99.851	99.851	99.851	100	100	97.024	89.645	94.286	91.976	90.56	90.118	90.118	90.265	90.413	94.94	90.855	89.528	100	90.855	95.87	95.623	98.22	92.478
KF696629 Conn vaccine/13 China	95.833	95.28	95.833	95.833	98.214	96.313	99.851	99.851	100	100		99.851	100	99.851	99.851	99.851	99.851	100	100	97.024	89.645	94.286	91.976	90.56	90.118	90.118	90.265	90.413	94.94	90.855	89.528	100	90.855	95.87	95.623	98.22	92.478
FJ904719 Conn46/91 USA	95.833	95.133	95.833	95.833	98.065	96.46	99.702	100	99.851	99.851	99.851		99.851	100	100	100	100	99.851	99.851	96.875	89.497	94.286	91.828	90.708	90.265	90.265	90.413	90.56	94.792	91.003	89.676	99.851	90.708	95.723	95.475	98.071	92.33
GU393333 FL18288/71 USA	95.815	96.114	95.815	95.815	98.356	97.16	99.851	99.851	100	100	100	99.851		99.851	99.851	99.851	99.851	100	100	97.01	90.433	94.286	92.377	91.33	90.882	90.882	91.031	91.181	94.918	91.629	90.284	100	91.629	96.712	95.889	98.505	93.274
GQ504720 ArkDPI/81 USA	95.833	95.133	95.833	95.833	98.065	96.46	99.702	100	99.851	99.851	99.851	100	99.851		100	100	100	99.851	99.851	96.875	89.497	94.286	91.828	90.708	90.265	90.265	90.413	90.56	94.792	91.003	89.676	99.851	90.708	95.723	95.475	98.071	92.33
KY776700 gCoV/ck/I0712/11 China	95.833	95.133	95.833	95.833	98.065	96.46	99.702	100	99.851	99.851	99.851	100	99.851	100		100	100	99.851	99.851	96.875	89.497	94.286	91.828	90.708	90.265	90.265	90.413	90.56	94.792	91.003	89.676	99.851	90.708	95.723	95.475	98.071	92.33
KY776701 gCoV/ck/I0108/17 China	95.833	95.133	95.833	95.833	98.065	96.46	99.702	100	99.851	99.851	99.851	100	99.851	100	100		100	99.851	99.851	96.875	89.497	94.286	91.828	90.708	90.265	90.265	90.413	90.56	94.792	91.003	89.676	99.851	90.708	95.723	95.475	98.071	92.33
KP868573 CK/CH/LJL/130908/15 China	95.833	95.133	95.833	95.833	98.065	96.46	99.702	100	99.851	99.851	99.851	100	99.851	100	100	100		99.851	99.851	96.875	89.497	94.286	91.828	90.708	90.265	90.265	90.413	90.56	94.792	91.003	89.676	99.851	90.708	95.723	95.475	98.071	92.33
KC506155 ck/CH/LJL/111054/13 China	95.833	95.28	95.833	95.833	98.214	96.313	99.851	99.851	100	100	100	99.851	100	99.851	99.851	99.851	99.851		100	97.024	89.645	94.286	91.976	90.56	90.118	90.118	90.265	90.413	94.94	90.855	89.528	100	90.855	95.87	95.623	98.22	92.478
KJ425485 ck/CH/LDL/110931/14 China	95.833	95.28	95.833	95.833	98.214	96.313	99.851	99.851	100	100	100	99.851	100	99.851	99.851	99.851	99.851	100		97.024	89.645	94.286	91.976	90.56	90.118	90.118	90.265	90.413	94.94	90.855	89.528	100	90.855	95.87	95.623	98.22	92.478
MH779860 Ark99 field virus/18 USA	95.387	94.838	95.387	95.387	95.833	94.838	97.173	96.875	97.024	97.024	97.024	96.875	97.01	96.875	96.875	96.875	96.875	97.024	97.024		89.201	93.714	90.639	89.823	89.381	89.381	89.528	89.676	93.452	90.413	90.56	97.01	91.298	94.985	94.585	97.033	93.068
FJ904714 Cal/95 USA	88.757	89.823	88.757	88.757	89.053	89.381	89.645	89.497	89.645	89.645	89.645	89.497	90.433	89.497	89.497	89.497	89.497	89.645	89.645	89.201		98.095	91.728	91.15	90.708	90.708	90.855	91.003	90.089	91.888	91.298	90.433	87.463	89.971	89.454	89.086	92.625
GU393331 Cal56b/91 USA	93.143	93.143	93.143	93.143	93.714	93.714	94.286	94.286	94.286	94.286	94.286	94.286	94.286	94.286	94.286	94.286	94.286	94.286	94.286	93.714	98.095		95.238	94.857	94.476	94.476	94.667	94.857	93.333	95.429	94.095	94.286	92	94.476	94.571	93.905	96
FJ904715 Cal557/03 USA	89.153	90.265	89.153	89.153	90.639	90.265	91.828	91.828	91.976	91.976	91.976	91.828	92.377	91.828	91.828	91.828	91.828	91.976	91.976	90.639	91.728	95.238		90.413	89.971	89.971	90.118	90.265	91.828	91.74	89.233	92.377	88.053	90.118	92.634	91.964	91.15
MN512434 IBV/Ck/Can/17-035614/17 Canada	90.118	90.56	90.118	90.118	89.233	92.625	90.56	90.708	90.56	90.56	90.56	90.708	91.33	90.708	90.708	90.708	90.708	90.56	90.56	89.823	91.15	94.857	90.413		99.558	99.558	99.705	99.853	90.56	98.083	94.69	91.33	89.528	91.888	91.814	91.003	96.313
MN512435 IBV/Ck/Can/17-036989/17 Canada	89.676	90.118	89.676	89.676	88.791	92.183	90.118	90.265	90.118	90.118	90.118	90.265	90.882	90.265	90.265	90.265	90.265	90.118	90.118	89.381	90.708	94.476	89.971	99.558		100	99.263	99.41	90.118	97.64	94.248	90.882	89.086	91.445	91.372	90.56	95.87
MN512438 IBV/Ck/Can/18-049707/18 Canada	89.676	90.118	89.676	89.676	88.791	92.183	90.118	90.265	90.118	90.118	90.118	90.265	90.882	90.265	90.265	90.265	90.265	90.118	90.118	89.381	90.708	94.476	89.971	99.558	100		99.263	99.41	90.118	97.64	94.248	90.882	89.086	91.445	91.372	90.56	95.87
MN512436 IBV/Can/18-048192T/18 Canada	89.823	90.265	89.823	89.823	88.938	92.33	90.265	90.413	90.265	90.265	90.265	90.413	91.031	90.413	90.413	90.413	90.413	90.265	90.265	89.528	90.855	94.667	90.118	99.705	99.263	99.263		99.558	90.265	97.788	94.395	91.031	89.233	91.593	91.519	90.708	96.018
MN512437 IBV/Ck/Can/18-04830/18 Canada	89.971	90.56	89.971	89.971	89.086	92.478	90.413	90.56	90.413	90.413	90.413	90.56	91.181	90.56	90.56	90.56	90.56	90.413	90.413	89.676	91.003	94.857	90.265	99.853	99.41	99.41	99.558		90.413	97.935	94.543	91.181	89.381	91.74	91.667	90.855	96.165
MN711790 GA/1472/04 USA	93.304	91.445	93.304	93.304	93.452	93.215	94.792	94.792	94.94	94.94	94.94	94.792	94.918	94.792	94.792	94.792	94.792	94.94	94.94	93.452	90.089	93.333	91.828	90.56	90.118	90.118	90.265	90.413		91.298	88.938	94.918	89.233	92.773	93.546	93.917	91.445
MN757859 CK/CR/1160/16 Costa Rica	90.708	91.15	90.708	90.708	89.528	93.068	90.855	91.003	90.855	90.855	90.855	91.003	91.629	91.003	91.003	91.003	91.003	90.855	90.855	90.413	91.888	95.429	91.74	98.083	97.64	97.64	97.788	97.935	91.298		96.018	91.629	90.118	91.888	92.404	91.298	97.198
GU393332 Delaware 072/92 USA	89.823	91.15	89.823	89.823	88.201	91.74	89.528	89.676	89.528	89.528	89.528	89.676	90.284	89.676	89.676	89.676	89.676	89.528	89.528	90.56	91.298	94.095	89.233	94.69	94.248	94.248	94.395	94.543	88.938	96.018		90.284	89.381	90.855	90.192	90.118	95.87
KF411040 CK/CH/LLN/111169/13 China	95.815	96.114	95.815	95.815	98.356	97.16	99.851	99.851	100	100	100	99.851	100	99.851	99.851	99.851	99.851	100	100	97.01	90.433	94.286	92.377	91.33	90.882	90.882	91.031	91.181	94.918	91.629	90.284		91.629	96.712	95.889	98.505	93.274
KU317090 SAIBK2/11 China	89.971	91.298	89.971	89.971	89.676	91.593	91.003	90.708	90.855	90.855	90.855	90.708	91.629	90.708	90.708	90.708	90.708	90.855	90.855	91.298	87.463	92	88.053	89.528	89.086	89.086	89.233	89.381	89.233	90.118	89.381	91.629		93.215	90.192	91.298	91.15
EU637854 CK/CH/LSD/05I/08 China	94.1	94.985	94.1	94.1	94.1	96.46	95.723	95.723	95.87	95.87	95.87	95.723	96.712	95.723	95.723	95.723	95.723	95.87	95.87	94.985	89.971	94.476	90.118	91.888	91.445	91.445	91.593	91.74	92.773	91.888	90.855	96.712	93.215		94.174	96.018	93.51
EU095850 TCoV/MG10/08 Canada	93.546	92.552	93.546	93.546	94.139	93.584	95.475	95.475	95.623	95.623	95.623	95.475	95.889	95.475	95.475	95.475	95.475	95.623	95.623	94.585	89.454	94.571	92.634	91.814	91.372	91.372	91.519	91.667	93.546	92.404	90.192	95.889	90.192	94.174		96.503	93.879
GQ427175 TCoV/IN-517/94 USA	95.104	94.69	95.104	95.104	96.439	96.313	98.071	98.071	98.22	98.22	98.22	98.071	98.505	98.071	98.071	98.071	98.071	98.22	98.22	97.033	89.086	93.905	91.964	91.003	90.56	90.56	90.708	90.855	93.917	91.298	90.118	98.505	91.298	96.018	96.503		92.773
GQ427174 TCoV/TX-GL/01 USA	92.183	93.805	92.183	92.183	91.15	92.92	92.478	92.33	92.478	92.478	92.478	92.33	93.274	92.33	92.33	92.33	92.33	92.478	92.478	93.068	92.625	96	91.15	96.313	95.87	95.87	96.018	96.165	91.445	97.198	95.87	93.274	91.15	93.51	93.879	92.773

## Sheet: 5a
Table S1h. Nucleotide identities between sequences in the DMV dataset (n=37). Gene 5a.
	OM525800 DMV26/OH/20	OM525798 FLS/AZ/17	OM525799 DMV25/OH/20	OM525801 DMV28/OH/20	MW024789 IA1162/20 USA	AY514485 Cal/99 USA	FJ904713 Mass41/06 USA	FJ904716 Conn46/96 USA	FJ904717 Conn46/72 USA	FJ904718 Conn46/83 USA	KF696629 Conn vaccine/13 China	FJ904719 Conn46/91 USA	GU393333 FL18288/71 USA	GQ504720 ArkDPI/81 USA	KY776700 gCoV/ck/I0712/11 China	KY776701 gCoV/ck/I0108/17 China	KP868573 CK/CH/LJL/130908/15 China	KC506155 ck/CH/LJL/111054/13 China	KJ425485 ck/CH/LDL/110931/14 China	MH779860 Ark99 field virus/18 USA	FJ904714 Cal/95 USA	GU393331 Cal56b/91 USA	FJ904715 Cal557/03 USA	MN512434 IBV/Ck/Can/17-035614/17 Canada	MN512435 IBV/Ck/Can/17-036989/17 Canada	MN512438 IBV/Ck/Can/18-049707/18 Canada	MN512436 IBV/Can/18-048192T/18 Canada	MN512437 IBV/Ck/Can/18-04830/18 Canada	MN711790 GA/1472/04 USA	MN757859 CK/CR/1160/16 Costa Rica	GU393332 Delaware 072/92 USA	KF411040 CK/CH/LLN/111169/13 China	KU317090 SAIBK2/11 China	EU637854 CK/CH/LSD/05I/08 China	EU095850 TCoV/MG10/08 Canada	GQ427175 TCoV/IN-517/94 USA	GQ427174 TCoV/TX-GL/01 USA
OM525800 DMV26/OH/20		92.424	100	100	93.939	93.939	93.939	93.939	93.939	93.939	93.939	93.939	93.434	93.939	93.939	93.939	93.939	93.939	93.939	93.434	96.465	96.97	93.182	93.939	93.939	93.939	93.939	93.939	93.939	95.455	92.929	93.939	93.939	93.434	97.475	93.434	96.465
OM525798 FLS/AZ/17	92.424		92.424	92.424	97.475	97.475	97.475	97.475	97.475	97.475	97.475	97.475	96.97	97.475	97.475	97.475	97.475	97.475	97.475	97.98	90.404	91.919	97.727	97.475	97.475	97.475	97.475	97.475	97.475	91.414	98.485	97.475	97.475	96.97	90.909	96.465	94.949
OM525799 DMV25/OH/20	100	92.424		100	93.939	93.939	93.939	93.939	93.939	93.939	93.939	93.939	93.434	93.939	93.939	93.939	93.939	93.939	93.939	93.434	96.465	96.97	93.182	93.939	93.939	93.939	93.939	93.939	93.939	95.455	92.929	93.939	93.939	93.434	97.475	93.434	96.465
OM525801 DMV28/OH/20	100	92.424	100		93.939	93.939	93.939	93.939	93.939	93.939	93.939	93.939	93.434	93.939	93.939	93.939	93.939	93.939	93.939	93.434	96.465	96.97	93.182	93.939	93.939	93.939	93.939	93.939	93.939	95.455	92.929	93.939	93.939	93.434	97.475	93.434	96.465
MW024789 IA1162/20 USA	93.939	97.475	93.939	93.939		98.99	98.99	98.99	98.99	98.99	98.99	98.99	98.485	98.99	98.99	98.99	98.99	98.99	98.99	98.485	91.919	93.434	98.232	98.99	98.99	98.99	98.99	98.99	98.99	91.919	97.98	98.99	98.99	98.485	92.424	97.98	96.465
AY514485 Cal/99 USA	93.939	97.475	93.939	93.939	98.99		100	100	100	100	100	100	99.495	100	100	100	100	100	100	98.485	91.919	93.434	98.232	100	100	100	100	100	100	91.919	97.98	100	100	99.495	92.424	98.99	96.465
FJ904713 Mass41/06 USA	93.939	97.475	93.939	93.939	98.99	100		100	100	100	100	100	99.495	100	100	100	100	100	100	98.485	91.919	93.434	98.232	100	100	100	100	100	100	91.919	97.98	100	100	99.495	92.424	98.99	96.465
FJ904716 Conn46/96 USA	93.939	97.475	93.939	93.939	98.99	100	100		100	100	100	100	99.495	100	100	100	100	100	100	98.485	91.919	93.434	98.232	100	100	100	100	100	100	91.919	97.98	100	100	99.495	92.424	98.99	96.465
FJ904717 Conn46/72 USA	93.939	97.475	93.939	93.939	98.99	100	100	100		100	100	100	99.495	100	100	100	100	100	100	98.485	91.919	93.434	98.232	100	100	100	100	100	100	91.919	97.98	100	100	99.495	92.424	98.99	96.465
FJ904718 Conn46/83 USA	93.939	97.475	93.939	93.939	98.99	100	100	100	100		100	100	99.495	100	100	100	100	100	100	98.485	91.919	93.434	98.232	100	100	100	100	100	100	91.919	97.98	100	100	99.495	92.424	98.99	96.465
KF696629 Conn vaccine/13 China	93.939	97.475	93.939	93.939	98.99	100	100	100	100	100		100	99.495	100	100	100	100	100	100	98.485	91.919	93.434	98.232	100	100	100	100	100	100	91.919	97.98	100	100	99.495	92.424	98.99	96.465
FJ904719 Conn46/91 USA	93.939	97.475	93.939	93.939	98.99	100	100	100	100	100	100		99.495	100	100	100	100	100	100	98.485	91.919	93.434	98.232	100	100	100	100	100	100	91.919	97.98	100	100	99.495	92.424	98.99	96.465
GU393333 FL18288/71 USA	93.434	96.97	93.434	93.434	98.485	99.495	99.495	99.495	99.495	99.495	99.495	99.495		99.495	99.495	99.495	99.495	99.495	99.495	97.98	91.919	93.434	97.727	99.495	99.495	99.495	99.495	99.495	99.495	91.414	97.475	99.495	99.495	98.99	91.919	98.485	95.96
GQ504720 ArkDPI/81 USA	93.939	97.475	93.939	93.939	98.99	100	100	100	100	100	100	100	99.495		100	100	100	100	100	98.485	91.919	93.434	98.232	100	100	100	100	100	100	91.919	97.98	100	100	99.495	92.424	98.99	96.465
KY776700 gCoV/ck/I0712/11 China	93.939	97.475	93.939	93.939	98.99	100	100	100	100	100	100	100	99.495	100		100	100	100	100	98.485	91.919	93.434	98.232	100	100	100	100	100	100	91.919	97.98	100	100	99.495	92.424	98.99	96.465
KY776701 gCoV/ck/I0108/17 China	93.939	97.475	93.939	93.939	98.99	100	100	100	100	100	100	100	99.495	100	100		100	100	100	98.485	91.919	93.434	98.232	100	100	100	100	100	100	91.919	97.98	100	100	99.495	92.424	98.99	96.465
KP868573 CK/CH/LJL/130908/15 China	93.939	97.475	93.939	93.939	98.99	100	100	100	100	100	100	100	99.495	100	100	100		100	100	98.485	91.919	93.434	98.232	100	100	100	100	100	100	91.919	97.98	100	100	99.495	92.424	98.99	96.465
KC506155 ck/CH/LJL/111054/13 China	93.939	97.475	93.939	93.939	98.99	100	100	100	100	100	100	100	99.495	100	100	100	100		100	98.485	91.919	93.434	98.232	100	100	100	100	100	100	91.919	97.98	100	100	99.495	92.424	98.99	96.465
KJ425485 ck/CH/LDL/110931/14 China	93.939	97.475	93.939	93.939	98.99	100	100	100	100	100	100	100	99.495	100	100	100	100	100		98.485	91.919	93.434	98.232	100	100	100	100	100	100	91.919	97.98	100	100	99.495	92.424	98.99	96.465
MH779860 Ark99 field virus/18 USA	93.434	97.98	93.434	93.434	98.485	98.485	98.485	98.485	98.485	98.485	98.485	98.485	97.98	98.485	98.485	98.485	98.485	98.485	98.485		91.414	92.929	97.727	98.485	98.485	98.485	98.485	98.485	98.485	91.414	98.485	98.485	98.485	97.98	91.919	97.475	95.96
FJ904714 Cal/95 USA	96.465	90.404	96.465	96.465	91.919	91.919	91.919	91.919	91.919	91.919	91.919	91.919	91.919	91.919	91.919	91.919	91.919	91.919	91.919	91.414		98.485	91.162	91.919	91.919	91.919	91.919	91.919	91.919	93.434	90.909	91.919	91.919	91.414	94.949	91.919	93.939
GU393331 Cal56b/91 USA	96.97	91.919	96.97	96.97	93.434	93.434	93.434	93.434	93.434	93.434	93.434	93.434	93.434	93.434	93.434	93.434	93.434	93.434	93.434	92.929	98.485		92.677	93.434	93.434	93.434	93.434	93.434	93.434	92.929	92.424	93.434	93.434	92.929	95.455	93.434	95.455
FJ904715 Cal557/03 USA	93.182	97.727	93.182	93.182	98.232	98.232	98.232	98.232	98.232	98.232	98.232	98.232	97.727	98.232	98.232	98.232	98.232	98.232	98.232	97.727	91.162	92.677		98.232	98.232	98.232	98.232	98.232	98.232	91.162	97.222	98.232	98.232	97.727	91.667	97.222	95.707
MN512434 IBV/Ck/Can/17-035614/17 Canada	93.939	97.475	93.939	93.939	98.99	100	100	100	100	100	100	100	99.495	100	100	100	100	100	100	98.485	91.919	93.434	98.232		100	100	100	100	100	91.919	97.98	100	100	99.495	92.424	98.99	96.465
MN512435 IBV/Ck/Can/17-036989/17 Canada	93.939	97.475	93.939	93.939	98.99	100	100	100	100	100	100	100	99.495	100	100	100	100	100	100	98.485	91.919	93.434	98.232	100		100	100	100	100	91.919	97.98	100	100	99.495	92.424	98.99	96.465
MN512438 IBV/Ck/Can/18-049707/18 Canada	93.939	97.475	93.939	93.939	98.99	100	100	100	100	100	100	100	99.495	100	100	100	100	100	100	98.485	91.919	93.434	98.232	100	100		100	100	100	91.919	97.98	100	100	99.495	92.424	98.99	96.465
MN512436 IBV/Can/18-048192T/18 Canada	93.939	97.475	93.939	93.939	98.99	100	100	100	100	100	100	100	99.495	100	100	100	100	100	100	98.485	91.919	93.434	98.232	100	100	100		100	100	91.919	97.98	100	100	99.495	92.424	98.99	96.465
MN512437 IBV/Ck/Can/18-04830/18 Canada	93.939	97.475	93.939	93.939	98.99	100	100	100	100	100	100	100	99.495	100	100	100	100	100	100	98.485	91.919	93.434	98.232	100	100	100	100		100	91.919	97.98	100	100	99.495	92.424	98.99	96.465
MN711790 GA/1472/04 USA	93.939	97.475	93.939	93.939	98.99	100	100	100	100	100	100	100	99.495	100	100	100	100	100	100	98.485	91.919	93.434	98.232	100	100	100	100	100		91.919	97.98	100	100	99.495	92.424	98.99	96.465
MN757859 CK/CR/1160/16 Costa Rica	95.455	91.414	95.455	95.455	91.919	91.919	91.919	91.919	91.919	91.919	91.919	91.919	91.414	91.919	91.919	91.919	91.919	91.919	91.919	91.414	93.434	92.929	91.162	91.919	91.919	91.919	91.919	91.919	91.919		92.929	91.919	91.919	91.414	93.434	91.414	92.424
GU393332 Delaware 072/92 USA	92.929	98.485	92.929	92.929	97.98	97.98	97.98	97.98	97.98	97.98	97.98	97.98	97.475	97.98	97.98	97.98	97.98	97.98	97.98	98.485	90.909	92.424	97.222	97.98	97.98	97.98	97.98	97.98	97.98	92.929		97.98	97.98	97.475	91.414	96.97	95.455
KF411040 CK/CH/LLN/111169/13 China	93.939	97.475	93.939	93.939	98.99	100	100	100	100	100	100	100	99.495	100	100	100	100	100	100	98.485	91.919	93.434	98.232	100	100	100	100	100	100	91.919	97.98		100	99.495	92.424	98.99	96.465
KU317090 SAIBK2/11 China	93.939	97.475	93.939	93.939	98.99	100	100	100	100	100	100	100	99.495	100	100	100	100	100	100	98.485	91.919	93.434	98.232	100	100	100	100	100	100	91.919	97.98	100		99.495	92.424	98.99	96.465
EU637854 CK/CH/LSD/05I/08 China	93.434	96.97	93.434	93.434	98.485	99.495	99.495	99.495	99.495	99.495	99.495	99.495	98.99	99.495	99.495	99.495	99.495	99.495	99.495	97.98	91.414	92.929	97.727	99.495	99.495	99.495	99.495	99.495	99.495	91.414	97.475	99.495	99.495		91.919	98.485	95.96
EU095850 TCoV/MG10/08 Canada	97.475	90.909	97.475	97.475	92.424	92.424	92.424	92.424	92.424	92.424	92.424	92.424	91.919	92.424	92.424	92.424	92.424	92.424	92.424	91.919	94.949	95.455	91.667	92.424	92.424	92.424	92.424	92.424	92.424	93.434	91.414	92.424	92.424	91.919		91.919	94.949
GQ427175 TCoV/IN-517/94 USA	93.434	96.465	93.434	93.434	97.98	98.99	98.99	98.99	98.99	98.99	98.99	98.99	98.485	98.99	98.99	98.99	98.99	98.99	98.99	97.475	91.919	93.434	97.222	98.99	98.99	98.99	98.99	98.99	98.99	91.414	96.97	98.99	98.99	98.485	91.919		95.96
GQ427174 TCoV/TX-GL/01 USA	96.465	94.949	96.465	96.465	96.465	96.465	96.465	96.465	96.465	96.465	96.465	96.465	95.96	96.465	96.465	96.465	96.465	96.465	96.465	95.96	93.939	95.455	95.707	96.465	96.465	96.465	96.465	96.465	96.465	92.424	95.455	96.465	96.465	95.96	94.949	95.96

## Sheet: 5b
Table S1i. Nucleotide identities between sequences in the DMV dataset (n=37). Gene 5b.
	OM525800 DMV26/OH/20	OM525798 FLS/AZ/17	OM525799 DMV25/OH/20	OM525801 DMV28/OH/20	MW024789 IA1162/20 USA	AY514485 Cal/99 USA	FJ904713 Mass41/06 USA	FJ904716 Conn46/96 USA	FJ904717 Conn46/72 USA	FJ904718 Conn46/83 USA	KF696629 Conn vaccine/13 China	FJ904719 Conn46/91 USA	GU393333 FL18288/71 USA	GQ504720 ArkDPI/81 USA	KY776700 gCoV/ck/I0712/11 China	KY776701 gCoV/ck/I0108/17 China	KP868573 CK/CH/LJL/130908/15 China	KC506155 ck/CH/LJL/111054/13 China	KJ425485 ck/CH/LDL/110931/14 China	MH779860 Ark99 field virus/18 USA	FJ904714 Cal/95 USA	GU393331 Cal56b/91 USA	FJ904715 Cal557/03 USA	MN512434 IBV/Ck/Can/17-035614/17 Canada	MN512435 IBV/Ck/Can/17-036989/17 Canada	MN512438 IBV/Ck/Can/18-049707/18 Canada	MN512436 IBV/Can/18-048192T/18 Canada	MN512437 IBV/Ck/Can/18-04830/18 Canada	MN711790 GA/1472/04 USA	MN757859 CK/CR/1160/16 Costa Rica	GU393332 Delaware 072/92 USA	KF411040 CK/CH/LLN/111169/13 China	KU317090 SAIBK2/11 China	EU637854 CK/CH/LSD/05I/08 China	GQ427175 TCoV/IN-517/94 USA	EU095850 TCoV/MG10/08 Canada	GQ427174 TCoV/TX-GL/01 USA
OM525800 DMV26/OH/20		97.992	100	100	97.992	97.189	97.59	98.394	97.992	98.394	98.394	98.394	98.394	97.992	97.59	97.59	97.59	98.394	98.394	97.59	97.992	97.59	96.787	98.394	98.394	98.394	98.394	98.394	97.992	97.59	97.59	98.394	98.394	98.394	97.59	96.386	96.787
OM525798 FLS/AZ/17	97.992		97.992	97.992	98.795	98.394	99.197	99.598	99.197	99.598	99.598	99.598	99.598	99.197	98.795	98.795	98.795	99.598	99.598	98.795	99.197	98.394	98.394	99.598	99.598	99.598	99.598	99.598	99.197	98.795	98.795	99.598	99.598	99.598	98.795	96.787	97.992
OM525799 DMV25/OH/20	100	97.992		100	97.992	97.189	97.59	98.394	97.992	98.394	98.394	98.394	98.394	97.992	97.59	97.59	97.59	98.394	98.394	97.59	97.992	97.59	96.787	98.394	98.394	98.394	98.394	98.394	97.992	97.59	97.59	98.394	98.394	98.394	97.59	96.386	96.787
OM525801 DMV28/OH/20	100	97.992	100		97.992	97.189	97.59	98.394	97.992	98.394	98.394	98.394	98.394	97.992	97.59	97.59	97.59	98.394	98.394	97.59	97.992	97.59	96.787	98.394	98.394	98.394	98.394	98.394	97.992	97.59	97.59	98.394	98.394	98.394	97.59	96.386	96.787
MW024789 IA1162/20 USA	97.992	98.795	97.992	97.992		97.59	98.795	98.795	98.394	98.795	98.795	98.795	98.795	98.394	97.992	97.992	97.992	98.795	98.795	97.992	98.394	97.59	98.394	98.795	98.795	98.795	98.795	98.795	98.394	97.992	98.394	98.795	98.795	98.795	97.992	97.189	97.189
AY514485 Cal/99 USA	97.189	98.394	97.189	97.189	97.59		97.992	98.795	98.394	98.795	98.795	98.795	98.795	98.394	97.992	97.992	97.992	98.795	98.795	97.992	98.394	97.59	97.189	98.795	98.795	98.795	98.795	98.795	98.394	97.992	97.992	98.795	98.795	98.795	97.992	95.984	97.189
FJ904713 Mass41/06 USA	97.59	99.197	97.59	97.59	98.795	97.992		99.197	98.795	99.197	99.197	99.197	99.197	98.795	98.394	98.394	98.394	99.197	99.197	98.394	98.795	97.992	98.394	99.197	99.197	99.197	99.197	99.197	98.795	98.394	98.394	99.197	99.197	99.197	98.394	96.386	97.59
FJ904716 Conn46/96 USA	98.394	99.598	98.394	98.394	98.795	98.795	99.197		99.598	100	100	100	100	99.598	99.197	99.197	99.197	100	100	99.197	99.598	98.795	98.394	100	100	100	100	100	99.598	99.197	99.197	100	100	100	99.197	97.189	98.394
FJ904717 Conn46/72 USA	97.992	99.197	97.992	97.992	98.394	98.394	98.795	99.598		99.598	99.598	99.598	99.598	99.197	98.795	98.795	98.795	99.598	99.598	98.795	99.197	98.394	97.992	99.598	99.598	99.598	99.598	99.598	99.197	98.795	98.795	99.598	99.598	99.598	98.795	96.787	97.992
FJ904718 Conn46/83 USA	98.394	99.598	98.394	98.394	98.795	98.795	99.197	100	99.598		100	100	100	99.598	99.197	99.197	99.197	100	100	99.197	99.598	98.795	98.394	100	100	100	100	100	99.598	99.197	99.197	100	100	100	99.197	97.189	98.394
KF696629 Conn vaccine/13 China	98.394	99.598	98.394	98.394	98.795	98.795	99.197	100	99.598	100		100	100	99.598	99.197	99.197	99.197	100	100	99.197	99.598	98.795	98.394	100	100	100	100	100	99.598	99.197	99.197	100	100	100	99.197	97.189	98.394
FJ904719 Conn46/91 USA	98.394	99.598	98.394	98.394	98.795	98.795	99.197	100	99.598	100	100		100	99.598	99.197	99.197	99.197	100	100	99.197	99.598	98.795	98.394	100	100	100	100	100	99.598	99.197	99.197	100	100	100	99.197	97.189	98.394
GU393333 FL18288/71 USA	98.394	99.598	98.394	98.394	98.795	98.795	99.197	100	99.598	100	100	100		99.598	99.197	99.197	99.197	100	100	99.197	99.598	98.795	98.394	100	100	100	100	100	99.598	99.197	99.197	100	100	100	99.197	97.189	98.394
GQ504720 ArkDPI/81 USA	97.992	99.197	97.992	97.992	98.394	98.394	98.795	99.598	99.197	99.598	99.598	99.598	99.598		99.598	99.598	99.598	99.598	99.598	99.598	99.197	98.394	97.992	99.598	99.598	99.598	99.598	99.598	100	99.598	98.795	99.598	99.598	99.598	98.795	96.787	97.992
KY776700 gCoV/ck/I0712/11 China	97.59	98.795	97.59	97.59	97.992	97.992	98.394	99.197	98.795	99.197	99.197	99.197	99.197	99.598		100	100	99.197	99.197	99.197	98.795	97.992	97.59	99.197	99.197	99.197	99.197	99.197	99.598	100	98.394	99.197	99.197	99.197	98.394	96.386	97.59
KY776701 gCoV/ck/I0108/17 China	97.59	98.795	97.59	97.59	97.992	97.992	98.394	99.197	98.795	99.197	99.197	99.197	99.197	99.598	100		100	99.197	99.197	99.197	98.795	97.992	97.59	99.197	99.197	99.197	99.197	99.197	99.598	100	98.394	99.197	99.197	99.197	98.394	96.386	97.59
KP868573 CK/CH/LJL/130908/15 China	97.59	98.795	97.59	97.59	97.992	97.992	98.394	99.197	98.795	99.197	99.197	99.197	99.197	99.598	100	100		99.197	99.197	99.197	98.795	97.992	97.59	99.197	99.197	99.197	99.197	99.197	99.598	100	98.394	99.197	99.197	99.197	98.394	96.386	97.59
KC506155 ck/CH/LJL/111054/13 China	98.394	99.598	98.394	98.394	98.795	98.795	99.197	100	99.598	100	100	100	100	99.598	99.197	99.197	99.197		100	99.197	99.598	98.795	98.394	100	100	100	100	100	99.598	99.197	99.197	100	100	100	99.197	97.189	98.394
KJ425485 ck/CH/LDL/110931/14 China	98.394	99.598	98.394	98.394	98.795	98.795	99.197	100	99.598	100	100	100	100	99.598	99.197	99.197	99.197	100		99.197	99.598	98.795	98.394	100	100	100	100	100	99.598	99.197	99.197	100	100	100	99.197	97.189	98.394
MH779860 Ark99 field virus/18 USA	97.59	98.795	97.59	97.59	97.992	97.992	98.394	99.197	98.795	99.197	99.197	99.197	99.197	99.598	99.197	99.197	99.197	99.197	99.197		98.795	97.992	97.59	99.197	99.197	99.197	99.197	99.197	99.598	99.197	98.394	99.197	99.197	99.197	99.197	97.189	98.394
FJ904714 Cal/95 USA	97.992	99.197	97.992	97.992	98.394	98.394	98.795	99.598	99.197	99.598	99.598	99.598	99.598	99.197	98.795	98.795	98.795	99.598	99.598	98.795		98.394	97.992	99.598	99.598	99.598	99.598	99.598	99.197	98.795	98.795	99.598	99.598	99.598	98.795	96.787	97.992
GU393331 Cal56b/91 USA	97.59	98.394	97.59	97.59	97.59	97.59	97.992	98.795	98.394	98.795	98.795	98.795	98.795	98.394	97.992	97.992	97.992	98.795	98.795	97.992	98.394		97.189	98.795	98.795	98.795	98.795	98.795	98.394	97.992	97.992	98.795	98.795	98.795	97.992	95.984	97.189
FJ904715 Cal557/03 USA	96.787	98.394	96.787	96.787	98.394	97.189	98.394	98.394	97.992	98.394	98.394	98.394	98.394	97.992	97.59	97.59	97.59	98.394	98.394	97.59	97.992	97.189		98.394	98.394	98.394	98.394	98.394	97.992	97.59	98.394	98.394	98.394	98.394	97.59	95.984	96.787
MN512434 IBV/Ck/Can/17-035614/17 Canada	98.394	99.598	98.394	98.394	98.795	98.795	99.197	100	99.598	100	100	100	100	99.598	99.197	99.197	99.197	100	100	99.197	99.598	98.795	98.394		100	100	100	100	99.598	99.197	99.197	100	100	100	99.197	97.189	98.394
MN512435 IBV/Ck/Can/17-036989/17 Canada	98.394	99.598	98.394	98.394	98.795	98.795	99.197	100	99.598	100	100	100	100	99.598	99.197	99.197	99.197	100	100	99.197	99.598	98.795	98.394	100		100	100	100	99.598	99.197	99.197	100	100	100	99.197	97.189	98.394
MN512438 IBV/Ck/Can/18-049707/18 Canada	98.394	99.598	98.394	98.394	98.795	98.795	99.197	100	99.598	100	100	100	100	99.598	99.197	99.197	99.197	100	100	99.197	99.598	98.795	98.394	100	100		100	100	99.598	99.197	99.197	100	100	100	99.197	97.189	98.394
MN512436 IBV/Can/18-048192T/18 Canada	98.394	99.598	98.394	98.394	98.795	98.795	99.197	100	99.598	100	100	100	100	99.598	99.197	99.197	99.197	100	100	99.197	99.598	98.795	98.394	100	100	100		100	99.598	99.197	99.197	100	100	100	99.197	97.189	98.394
MN512437 IBV/Ck/Can/18-04830/18 Canada	98.394	99.598	98.394	98.394	98.795	98.795	99.197	100	99.598	100	100	100	100	99.598	99.197	99.197	99.197	100	100	99.197	99.598	98.795	98.394	100	100	100	100		99.598	99.197	99.197	100	100	100	99.197	97.189	98.394
MN711790 GA/1472/04 USA	97.992	99.197	97.992	97.992	98.394	98.394	98.795	99.598	99.197	99.598	99.598	99.598	99.598	100	99.598	99.598	99.598	99.598	99.598	99.598	99.197	98.394	97.992	99.598	99.598	99.598	99.598	99.598		99.598	98.795	99.598	99.598	99.598	98.795	96.787	97.992
MN757859 CK/CR/1160/16 Costa Rica	97.59	98.795	97.59	97.59	97.992	97.992	98.394	99.197	98.795	99.197	99.197	99.197	99.197	99.598	100	100	100	99.197	99.197	99.197	98.795	97.992	97.59	99.197	99.197	99.197	99.197	99.197	99.598		98.394	99.197	99.197	99.197	98.394	96.386	97.59
GU393332 Delaware 072/92 USA	97.59	98.795	97.59	97.59	98.394	97.992	98.394	99.197	98.795	99.197	99.197	99.197	99.197	98.795	98.394	98.394	98.394	99.197	99.197	98.394	98.795	97.992	98.394	99.197	99.197	99.197	99.197	99.197	98.795	98.394		99.197	99.197	99.197	98.394	96.787	97.59
KF411040 CK/CH/LLN/111169/13 China	98.394	99.598	98.394	98.394	98.795	98.795	99.197	100	99.598	100	100	100	100	99.598	99.197	99.197	99.197	100	100	99.197	99.598	98.795	98.394	100	100	100	100	100	99.598	99.197	99.197		100	100	99.197	97.189	98.394
KU317090 SAIBK2/11 China	98.394	99.598	98.394	98.394	98.795	98.795	99.197	100	99.598	100	100	100	100	99.598	99.197	99.197	99.197	100	100	99.197	99.598	98.795	98.394	100	100	100	100	100	99.598	99.197	99.197	100		100	99.197	97.189	98.394
EU637854 CK/CH/LSD/05I/08 China	98.394	99.598	98.394	98.394	98.795	98.795	99.197	100	99.598	100	100	100	100	99.598	99.197	99.197	99.197	100	100	99.197	99.598	98.795	98.394	100	100	100	100	100	99.598	99.197	99.197	100	100		99.197	97.189	98.394
GQ427175 TCoV/IN-517/94 USA	97.59	98.795	97.59	97.59	97.992	97.992	98.394	99.197	98.795	99.197	99.197	99.197	99.197	98.795	98.394	98.394	98.394	99.197	99.197	99.197	98.795	97.992	97.59	99.197	99.197	99.197	99.197	99.197	98.795	98.394	98.394	99.197	99.197	99.197		97.992	99.197
EU095850 TCoV/MG10/08 Canada	96.386	96.787	96.386	96.386	97.189	95.984	96.386	97.189	96.787	97.189	97.189	97.189	97.189	96.787	96.386	96.386	96.386	97.189	97.189	97.189	96.787	95.984	95.984	97.189	97.189	97.189	97.189	97.189	96.787	96.386	96.787	97.189	97.189	97.189	97.992		98.795
GQ427174 TCoV/TX-GL/01 USA	96.787	97.992	96.787	96.787	97.189	97.189	97.59	98.394	97.992	98.394	98.394	98.394	98.394	97.992	97.59	97.59	97.59	98.394	98.394	98.394	97.992	97.189	96.787	98.394	98.394	98.394	98.394	98.394	97.992	97.59	97.59	98.394	98.394	98.394	99.197	98.795

## Sheet: Nucleocapsid
Table S1j. Nucleotide identities between sequences in the DMV dataset (n=37). Nucleocapsid gene.
	OM525800 DMV26/OH/20	OM525798 FLS/AZ/17	OM525799 DMV25/OH/20	OM525801 DMV28/OH/20	MW024789 IA1162/20 USA	AY514485 Cal/99 USA	FJ904713 Mass41/06 USA	FJ904716 Conn46/96 USA	FJ904717 Conn46/72 USA	FJ904718 Conn46/83 USA	KF696629 Conn vaccine/13 China	FJ904719 Conn46/91 USA	GU393333 FL18288/71 USA	GQ504720 ArkDPI/81 USA	KY776700 gCoV/ck/I0712/11 China	KY776701 gCoV/ck/I0108/17 China	KP868573 CK/CH/LJL/130908/15 China	KC506155 ck/CH/LJL/111054/13 China	KJ425485 ck/CH/LDL/110931/14 China	MH779860 Ark99 field virus/18 USA	FJ904714 Cal/95 USA	GU393331 Cal56b/91 USA	FJ904715 Cal557/03 USA	MN512434 IBV/Ck/Can/17-035614/17 Canada	MN512435 IBV/Ck/Can/17-036989/17 Canada	MN512438 IBV/Ck/Can/18-049707/18 Canada	MN512436 IBV/Can/18-048192T/18 Canada	MN512437 IBV/Ck/Can/18-04830/18 Canada	MN711790 GA/1472/04 USA	MN757859 CK/CR/1160/16 Costa Rica	GU393332 Delaware 072/92 USA	KF411040 CK/CH/LLN/111169/13 China	KU317090 SAIBK2/11 China	EU637854 CK/CH/LSD/05I/08 China	GQ427174 TCoV/TX-GL/01 USA	GQ427175 TCoV/IN-517/94 USA	EU095850 TCoV/MG10/08 Canada
OM525800 DMV26/OH/20		93.76	100	100	95.041	93.821	95.122	95.122	94.959	95.122	95.122	95.122	94.959	94.878	94.878	94.878	94.797	95.122	95.122	94.553	93.659	94.959	93.089	94.797	94.878	94.878	94.715	94.878	94.634	94.715	93.496	90.976	89.187	95.122	95.122	94.797	93.333
OM525798 FLS/AZ/17	93.76		93.76	93.76	94.898	94.045	97.093	97.093	96.931	97.093	97.093	97.093	96.931	96.85	96.85	96.85	96.768	97.093	97.093	96.606	93.76	96.931	93.435	96.037	96.118	96.118	95.955	96.118	96.606	96.362	95.549	90.955	90.183	97.093	97.093	96.524	94.085
OM525799 DMV25/OH/20	100	93.76		100	95.041	93.821	95.122	95.122	94.959	95.122	95.122	95.122	94.959	94.878	94.878	94.878	94.797	95.122	95.122	94.553	93.659	94.959	93.089	94.797	94.878	94.878	94.715	94.878	94.634	94.715	93.496	90.976	89.187	95.122	95.122	94.797	93.333
OM525801 DMV28/OH/20	100	93.76	100		95.041	93.821	95.122	95.122	94.959	95.122	95.122	95.122	94.959	94.878	94.878	94.878	94.797	95.122	95.122	94.553	93.659	94.959	93.089	94.797	94.878	94.878	94.715	94.878	94.634	94.715	93.496	90.976	89.187	95.122	95.122	94.797	93.333
MW024789 IA1162/20 USA	95.041	94.898	95.041	95.041		93.496	96.016	96.016	95.854	96.016	96.016	96.016	95.854	95.772	95.772	95.772	95.691	96.016	96.016	95.772	92.846	95.854	93.496	95.854	95.935	95.935	95.772	95.935	95.691	95.447	95.122	90.325	88.78	96.179	96.016	95.854	93.659
AY514485 Cal/99 USA	93.821	94.045	93.821	93.821	93.496		95.203	95.203	95.041	95.203	95.203	95.203	95.041	95.122	95.122	95.122	95.041	95.203	95.203	94.715	96.585	94.878	95.285	94.146	94.228	94.228	93.902	94.065	94.878	95.772	94.228	91.626	89.837	95.041	95.203	96.016	93.496
FJ904713 Mass41/06 USA	95.122	97.093	95.122	95.122	96.016	95.203		100	99.837	100	100	100	99.675	99.756	99.756	99.756	99.675	100	100	98.374	94.715	99.512	94.634	98.943	99.024	99.024	98.699	98.862	99.35	97.642	96.829	91.626	90.894	99.837	100	98.049	95.772
FJ904716 Conn46/96 USA	95.122	97.093	95.122	95.122	96.016	95.203	100		99.837	100	100	100	99.675	99.756	99.756	99.756	99.675	100	100	98.374	94.715	99.512	94.634	98.943	99.024	99.024	98.699	98.862	99.35	97.642	96.829	91.626	90.894	99.837	100	98.049	95.772
FJ904717 Conn46/72 USA	94.959	96.931	94.959	94.959	95.854	95.041	99.837	99.837		99.837	99.837	99.837	99.512	99.593	99.593	99.593	99.512	99.837	99.837	98.211	94.553	99.35	94.472	98.78	98.862	98.862	98.537	98.699	99.187	97.48	96.667	91.463	90.732	99.675	99.837	97.886	95.61
FJ904718 Conn46/83 USA	95.122	97.093	95.122	95.122	96.016	95.203	100	100	99.837		100	100	99.675	99.756	99.756	99.756	99.675	100	100	98.374	94.715	99.512	94.634	98.943	99.024	99.024	98.699	98.862	99.35	97.642	96.829	91.626	90.894	99.837	100	98.049	95.772
KF696629 Conn vaccine/13 China	95.122	97.093	95.122	95.122	96.016	95.203	100	100	99.837	100		100	99.675	99.756	99.756	99.756	99.675	100	100	98.374	94.715	99.512	94.634	98.943	99.024	99.024	98.699	98.862	99.35	97.642	96.829	91.626	90.894	99.837	100	98.049	95.772
FJ904719 Conn46/91 USA	95.122	97.093	95.122	95.122	96.016	95.203	100	100	99.837	100	100		99.675	99.756	99.756	99.756	99.675	100	100	98.374	94.715	99.512	94.634	98.943	99.024	99.024	98.699	98.862	99.35	97.642	96.829	91.626	90.894	99.837	100	98.049	95.772
GU393333 FL18288/71 USA	94.959	96.931	94.959	94.959	95.854	95.041	99.675	99.675	99.512	99.675	99.675	99.675		99.431	99.431	99.431	99.35	99.675	99.675	98.211	94.553	99.35	94.472	98.618	98.699	98.699	98.374	98.537	99.187	97.561	96.829	91.463	90.732	99.512	99.675	97.724	95.61
GQ504720 ArkDPI/81 USA	94.878	96.85	94.878	94.878	95.772	95.122	99.756	99.756	99.593	99.756	99.756	99.756	99.431		100	100	99.919	99.756	99.756	98.13	94.472	99.268	94.715	98.699	98.78	98.78	98.455	98.618	99.431	97.48	96.585	91.382	90.65	99.593	99.756	97.886	95.61
KY776700 gCoV/ck/I0712/11 China	94.878	96.85	94.878	94.878	95.772	95.122	99.756	99.756	99.593	99.756	99.756	99.756	99.431	100		100	99.919	99.756	99.756	98.13	94.472	99.268	94.715	98.699	98.78	98.78	98.455	98.618	99.431	97.48	96.585	91.382	90.65	99.593	99.756	97.886	95.61
KY776701 gCoV/ck/I0108/17 China	94.878	96.85	94.878	94.878	95.772	95.122	99.756	99.756	99.593	99.756	99.756	99.756	99.431	100	100		99.919	99.756	99.756	98.13	94.472	99.268	94.715	98.699	98.78	98.78	98.455	98.618	99.431	97.48	96.585	91.382	90.65	99.593	99.756	97.886	95.61
KP868573 CK/CH/LJL/130908/15 China	94.797	96.768	94.797	94.797	95.691	95.041	99.675	99.675	99.512	99.675	99.675	99.675	99.35	99.919	99.919	99.919		99.675	99.675	98.049	94.39	99.187	94.634	98.618	98.699	98.699	98.374	98.537	99.35	97.398	96.504	91.301	90.569	99.512	99.675	97.805	95.528
KC506155 ck/CH/LJL/111054/13 China	95.122	97.093	95.122	95.122	96.016	95.203	100	100	99.837	100	100	100	99.675	99.756	99.756	99.756	99.675		100	98.374	94.715	99.512	94.634	98.943	99.024	99.024	98.699	98.862	99.35	97.642	96.829	91.626	90.894	99.837	100	98.049	95.772
KJ425485 ck/CH/LDL/110931/14 China	95.122	97.093	95.122	95.122	96.016	95.203	100	100	99.837	100	100	100	99.675	99.756	99.756	99.756	99.675	100		98.374	94.715	99.512	94.634	98.943	99.024	99.024	98.699	98.862	99.35	97.642	96.829	91.626	90.894	99.837	100	98.049	95.772
MH779860 Ark99 field virus/18 USA	94.553	96.606	94.553	94.553	95.772	94.715	98.374	98.374	98.211	98.374	98.374	98.374	98.211	98.13	98.13	98.13	98.049	98.374	98.374		94.634	98.211	94.472	97.398	97.48	97.48	97.317	97.48	97.886	97.48	96.504	91.463	90.976	98.374	98.374	97.561	95.285
FJ904714 Cal/95 USA	93.659	93.76	93.659	93.659	92.846	96.585	94.715	94.715	94.553	94.715	94.715	94.715	94.553	94.472	94.472	94.472	94.39	94.715	94.715	94.634		94.553	95.691	93.659	93.74	93.74	93.577	93.74	94.309	95.285	93.659	91.301	90.325	94.797	94.715	94.878	93.089
GU393331 Cal56b/91 USA	94.959	96.931	94.959	94.959	95.854	94.878	99.512	99.512	99.35	99.512	99.512	99.512	99.35	99.268	99.268	99.268	99.187	99.512	99.512	98.211	94.553		94.634	98.455	98.537	98.537	98.374	98.537	99.024	97.48	96.667	91.301	90.732	99.512	99.512	97.561	95.447
FJ904715 Cal557/03 USA	93.089	93.435	93.089	93.089	93.496	95.285	94.634	94.634	94.472	94.634	94.634	94.634	94.472	94.715	94.715	94.715	94.634	94.634	94.634	94.472	95.691	94.634		94.065	94.146	94.146	93.984	94.146	94.472	94.878	93.577	90.325	88.943	94.634	94.634	94.39	91.951
MN512434 IBV/Ck/Can/17-035614/17 Canada	94.797	96.037	94.797	94.797	95.854	94.146	98.943	98.943	98.78	98.943	98.943	98.943	98.618	98.699	98.699	98.699	98.618	98.943	98.943	97.398	93.659	98.455	94.065		99.919	99.919	99.756	99.919	98.293	96.585	95.772	90.569	89.837	98.78	98.943	96.992	94.715
MN512435 IBV/Ck/Can/17-036989/17 Canada	94.878	96.118	94.878	94.878	95.935	94.228	99.024	99.024	98.862	99.024	99.024	99.024	98.699	98.78	98.78	98.78	98.699	99.024	99.024	97.48	93.74	98.537	94.146	99.919		100	99.675	99.837	98.374	96.667	95.854	90.65	89.919	98.862	99.024	97.073	94.797
MN512438 IBV/Ck/Can/18-049707/18 Canada	94.878	96.118	94.878	94.878	95.935	94.228	99.024	99.024	98.862	99.024	99.024	99.024	98.699	98.78	98.78	98.78	98.699	99.024	99.024	97.48	93.74	98.537	94.146	99.919	100		99.675	99.837	98.374	96.667	95.854	90.65	89.919	98.862	99.024	97.073	94.797
MN512436 IBV/Can/18-048192T/18 Canada	94.715	95.955	94.715	94.715	95.772	93.902	98.699	98.699	98.537	98.699	98.699	98.699	98.374	98.455	98.455	98.455	98.374	98.699	98.699	97.317	93.577	98.374	93.984	99.756	99.675	99.675		99.837	98.049	96.504	95.691	90.325	89.756	98.699	98.699	96.748	94.472
MN512437 IBV/Ck/Can/18-04830/18 Canada	94.878	96.118	94.878	94.878	95.935	94.065	98.862	98.862	98.699	98.862	98.862	98.862	98.537	98.618	98.618	98.618	98.537	98.862	98.862	97.48	93.74	98.537	94.146	99.919	99.837	99.837	99.837		98.211	96.667	95.854	90.488	89.919	98.862	98.862	96.911	94.634
MN711790 GA/1472/04 USA	94.634	96.606	94.634	94.634	95.691	94.878	99.35	99.35	99.187	99.35	99.35	99.35	99.187	99.431	99.431	99.431	99.35	99.35	99.35	97.886	94.309	99.024	94.472	98.293	98.374	98.374	98.049	98.211		97.236	96.341	91.463	90.569	99.187	99.35	97.48	95.366
MN757859 CK/CR/1160/16 Costa Rica	94.715	96.362	94.715	94.715	95.447	95.772	97.642	97.642	97.48	97.642	97.642	97.642	97.561	97.48	97.48	97.48	97.398	97.642	97.642	97.48	95.285	97.48	94.878	96.585	96.667	96.667	96.504	96.667	97.236		96.341	91.545	90.976	97.642	97.642	97.805	95.041
GU393332 Delaware 072/92 USA	93.496	95.549	93.496	93.496	95.122	94.228	96.829	96.829	96.667	96.829	96.829	96.829	96.829	96.585	96.585	96.585	96.504	96.829	96.829	96.504	93.659	96.667	93.577	95.772	95.854	95.854	95.691	95.854	96.341	96.341		90.163	89.512	96.829	96.829	96.585	93.74
KF411040 CK/CH/LLN/111169/13 China	90.976	90.955	90.976	90.976	90.325	91.626	91.626	91.626	91.463	91.626	91.626	91.626	91.463	91.382	91.382	91.382	91.301	91.626	91.626	91.463	91.301	91.301	90.325	90.569	90.65	90.65	90.325	90.488	91.463	91.545	90.163		93.577	91.545	91.626	92.195	90.65
KU317090 SAIBK2/11 China	89.187	90.183	89.187	89.187	88.78	89.837	90.894	90.894	90.732	90.894	90.894	90.894	90.732	90.65	90.65	90.65	90.569	90.894	90.894	90.976	90.325	90.732	88.943	89.837	89.919	89.919	89.756	89.919	90.569	90.976	89.512	93.577		90.894	90.894	90.569	89.024
EU637854 CK/CH/LSD/05I/08 China	95.122	97.093	95.122	95.122	96.179	95.041	99.837	99.837	99.675	99.837	99.837	99.837	99.512	99.593	99.593	99.593	99.512	99.837	99.837	98.374	94.797	99.512	94.634	98.78	98.862	98.862	98.699	98.862	99.187	97.642	96.829	91.545	90.894		99.837	97.886	95.691
GQ427174 TCoV/TX-GL/01 USA	95.122	97.093	95.122	95.122	96.016	95.203	100	100	99.837	100	100	100	99.675	99.756	99.756	99.756	99.675	100	100	98.374	94.715	99.512	94.634	98.943	99.024	99.024	98.699	98.862	99.35	97.642	96.829	91.626	90.894	99.837		98.049	95.772
GQ427175 TCoV/IN-517/94 USA	94.797	96.524	94.797	94.797	95.854	96.016	98.049	98.049	97.886	98.049	98.049	98.049	97.724	97.886	97.886	97.886	97.805	98.049	98.049	97.561	94.878	97.561	94.39	96.992	97.073	97.073	96.748	96.911	97.48	97.805	96.585	92.195	90.569	97.886	98.049		96.098
EU095850 TCoV/MG10/08 Canada	93.333	94.085	93.333	93.333	93.659	93.496	95.772	95.772	95.61	95.772	95.772	95.772	95.61	95.61	95.61	95.61	95.528	95.772	95.772	95.285	93.089	95.447	91.951	94.715	94.797	94.797	94.472	94.634	95.366	95.041	93.74	90.65	89.024	95.691	95.772	96.098
